# Supplementary material for: A Genome-Wide Association Study Reveals New Genes in a Molecular Network Associated With Alcohol Dependence and Related Clinical Measures
Source: Preprints.org preprint supplement (doi:10.20944/preprints202208.0178.v1), 2022-08-09
Supplement: Supplementary file 1 [file supplementary]

## Sheet: Table S2A
Table S2A. GWAS results for AD (p-values < 5×10-6 and replicated associations)
Chr	Position (hg38)	SNP	Test name	-Log p-value (screening)	P-value (Yates-corrected Chi-sqare)	P-value (Fisher's exact)	P-value (Z-test logOR)	Effect size	Controls_AA	Controls_Aa	Controls_aa	Cases_AA	Cases_Aa	Cases_aa	Replication	-log p-value (original results)
6	46872709	rs220677	ALC:INC/SPB:F/CAT/D	7.87538	1.33235e-08	1.46653e-07	2.26695e-07	10.5706	174	44	2	9	16	1
6	46872709	rs220677	ALC:INC/SPB:F/CAT/CD	7.73236	1.85198e-08	1.46653e-07		2.3306	174	44	2	9	16	1
6	46872709	rs220677	ALC:INC/SPB:F/CAT/A	7.67516	2.11273e-08	6.37636e-07	1.17596e-07	6.27433	174	44	2	9	16	1
6	46872709	rs220677	ALC:INC/SPB:F/GLM:PC1/D	6.78324	1.33235e-08	1.46653e-07	2.26695e-07	10.5706	174	44	2	9	16	1
6	46872709	rs220677	ALC:INC/SPB:F/GLM:PC1/CD	5.97206	1.85198e-08	1.46653e-07		2.3306	174	44	2	9	16	1
6	46872709	rs220677	ALC:INC/SPB:F/GLM:PC1/A	5.97861	2.11273e-08	6.37636e-07	1.17596e-07	6.27433	174	44	2	9	16	1
4	142417942	rs17715398	ALC:INC/SPB:F/CAT/CD	7.22001	6.02539e-08	1.82941e-05		2.3046	201	9	1	19	6	1
4	142417942	rs17715398	ALC:INC/SPB:F/GLM:PC1/A	5.43085	1.12082e-08	3.95016e-06	8.20352e-06	21.9095	201	9	1	19	6	1
4	142417942	rs17715398	ALC:INC/SPB:F/CAT/A	5.40339	1.12082e-08	3.95016e-06	8.20352e-06	21.9095	201	9	1	19	6	1
5	153115323	rs6868545	ALC:INC/SPB/CAT/CD	6.82562	1.49411e-07	8.25175e-06		0.986083	1037	164	7	170	15	6	Schizophrenia	6.1549
5	153115323	rs6868545	ALC:INC/SPB:M/CAT/CD	6.01663	9.62439e-07	3.04197e-05		1.0212	848	133	7	145	14	6	Schizophrenia	6.1549
2	129642537	rs58607060	ALC:INC/SPB/CAT/CD	6.67224	2.12697e-07	2.73335e-06		1.30677	773	385	50	102	68	21
2	129642537	rs58607060	ALC:INC/SPB/CAT/R	6.21033	6.16123e-07	5.29132e-06	1.45509e-06	4.20145	773	385	50	102	68	21
2	129642537	rs58607060	ALC:INC/SPB:M/CAT/CD	6.17528	6.67911e-07	7.63802e-06		1.31541	620	323	45	87	58	20
2	129642537	rs58607060	ALC:INC/SPB:M/CAT/R	6.02513	9.43787e-07	6.84698e-06	2.23194e-06	4.3934	620	323	45	87	58	20
2	129642537	rs58607060	ALC:INC/SPB/CAT/A	5.30829	4.91714e-06	7.6569e-06	4.35584e-06	1.78873	773	385	50	102	68	21
9	124212743	rs10760332	ALC:INC/SPB:F/CAT/CD	6.65705	2.20266e-07	0.000177193		1.54465	167	49	4	16	6	4
12	2349784	rs73035417	ALC:INC/SPB:F/CAT/CD	6.62396	2.37707e-07	0.000214299		1.36504	166	49	4	18	4	4
11	36806319	rs1518754	ALC:INC/SPB:M/CAT/CD	6.61972	2.40036e-07	3.23479e-05		1.08574	798	184	6	132	27	6
1	187394261	rs12728510	ALC:INC/SPB:F/CAT/CD	6.59571	2.53683e-07	5.49147e-05		1.4577	136	73	11	14	5	7
1	246921651	rs10924867	ALC:INC/SPB:F/CAT/CD	6.5021	3.14703e-07	6.27733e-05		1.65422	140	69	11	12	7	7
8	127456099	rs36019116	ALC:INC/SPB/CAT/CD	6.23818	5.77855e-07	2.68864e-05		1.19704	925	265	18	136	44	11
1	61203863	rs6695564	ALC:INC/SPB/CAT/R	6.17599	6.66825e-07	4.3358e-06	1.2191e-06	3.67292	722	421	65	97	69	25
1	61203863	rs6695564	ALC:INC/SPB/CAT/CD	6.12802	7.44696e-07	8.00075e-06		1.27605	722	421	65	97	69	25
12	33941772	rs843783	ALC:INC/SPB:F/CAT/CD	6.0203	9.54344e-07	0.000124828		1.41348	151	60	9	16	4	6
12	33982875	rs11053031	ALC:INC/SPB:F/CAT/CD	6.0203	9.54344e-07	0.000124828		1.41348	151	60	9	16	4	6
20	58008380	rs6025970	ALC:INC/SPB:M/GLM:PC1/R	5.95641	2.51827e-05	3.24813e-06	4.80868e-05	0.268651	346	458	184	66	88	11
2	229125224	rs12478734	ALC:INC/SPB:M/GLM:PC1/CD	5.935	0.000968503	3.1154e-05		0.800519	931	57	0	165	0	0
2	229125224	rs12478734	ALC:INC/SPB:M/GLM:PC1/D	5.935	0.000968503	3.1154e-05		0	931	57	0	165	0	0
2	229125224	rs12478734	ALC:INC/SPB:M/GLM:PC1/A	5.80444	0.00115345	3.94134e-05		0	931	57	0	165	0	0
2	229125224	rs12478734	ALC:INC/SPB/GLM:PC1/D	5.38392	0.000636421	3.17623e-05	0.00714106	0.0661695	1132	75	1	190	1	0
2	229125224	rs12478734	ALC:INC/SPB/GLM:PC1/A	5.32172	0.000702267	4.21588e-05	0.00753619	0.0676515	1132	75	1	190	1	0
17	49922166	rs271643	ALC:INC/SPB:F/CAT/CD	5.75175	1.77112e-06	5.65361e-05		1.79989	113	88	19	7	10	9
4	140428812	rs17387354	ALC:INC/SPB/CAT/CD	5.74203	1.8112e-06	1.52741e-05		1.3151	1113	93	2	161	28	2
4	140428812	rs17387354	ALC:INC/SPB/CAT/A	5.35585	4.40707e-06	2.20823e-05	5.21949e-06	2.76817	1113	93	2	161	28	2
17	49928516	rs271653	ALC:INC/SPB:F/CAT/CD	5.73322	1.84835e-06	5.77473e-05		1.79073	112	89	19	7	10	9
13	88581133	rs78036981	ALC:INC/SPB:F/CAT/CD	5.71064	1.94695e-06	4.04272e-05		2.0426	200	19	1	17	8	1
18	58844907	rs77797842	ALC:INC/SPB:F/CAT/CD	5.68171	2.08106e-06	4.82412e-05	1.59414e-05	2.06685	205	15	0	18	8	0
7	48953377	rs77726484	ALC:INC/SPB:F/CAT/CD	5.65294	2.22361e-06	0.000157423		2.1833	216	4	0	22	4	0
6	46874069	rs220673	ALC:INC/SPB:F/CAT/D	5.63242	2.33119e-06	3.96585e-06	8.72996e-06	7.58082	158	57	5	8	17	1
6	46874069	rs220673	ALC:INC/SPB:F/CAT/CD	5.42272	3.77815e-06	6.71424e-06		1.88867	158	57	5	8	17	1
6	46874069	rs220673	ALC:INC/SPB:F/GLM:PC1/D	5.41564	2.33119e-06	3.96585e-06	8.72996e-06	7.58082	158	57	5	8	17	1
1	100348842	rs77355199	ALC:INC/SPB:F/CAT/CD	5.61326	2.43633e-06	0.000242204		1.64505	146	67	7	12	9	5
18	33595184	rs2032187	ALC:INC/SPB/CAT/R	5.58877	2.57768e-06	2.01677e-05	6.54133e-06	4.81584	785	386	35	121	53	16
18	33595184	rs2032187	ALC:INC/SPB/CAT/CD	5.41339	3.86021e-06	5.38316e-05		1.11711	785	386	35	121	53	16
4	103127261	rs77611518	ALC:INC/SPB:M/CAT/D	5.55093	2.81235e-06	1.10356e-05	3.76954e-06	3.31492	912	70	3	137	26	1
4	103127261	rs77611518	ALC:INC/SPB:M/CAT/A	5.50474	3.12794e-06	1.26861e-05	4.25014e-06	3.09704	912	70	3	137	26	1
19	3150073	rs3815310	ALC:INC/SPB:M/CAT/CD	5.47517	3.34838e-06	5.33091e-05		1.28268	882	91	4	138	23	4
2	3385882	rs72765373	ALC:INC/SPB:F/CAT/CD	5.44474	3.59139e-06	5.90311e-05		1.83665	167	51	2	12	12	2
2	133905193	rs34856203	ALC:INC/SPB:F/CAT/CD	5.4427	3.60827e-06	6.61476e-05	1.96968e-05	2.03325	203	16	0	17	8	0
16	7651178	rs3785223	ALC:INC/SPB:F/CAT/CD	5.3735	4.23154e-06	0.000284093		1.67424	212	7	1	21	5	0
5	161063836	rs115512732	ALC:INC/SPB:M/GLM:PC1/CD	5.3634	0.000851078	3.14858e-05		0.798647	929	58	0	165	0	0
5	161063836	rs115512732	ALC:INC/SPB:M/GLM:PC1/D	5.3634	0.000851078	3.14858e-05		0	929	58	0	165	0	0
11	111062682	rs76055872	ALC:INC/SPB/CAT/CD	5.35376	4.42832e-06	2.19516e-05	7.22467e-06	1.31955	1158	50	0	171	20	0
11	111062682	rs76055872	ALC:INC/SPB/CAT/D	5.35376	4.42832e-06	2.19516e-05	7.22467e-06	3.84188	1158	50	0	171	20	0
16	79246401	rs9922579	ALC:INC/SPB/CAT/CD	5.34444	4.52437e-06	0.000119489		1.06868	986	209	12	156	27	8
2	224290348	rs17793362	ALC:INC/SPB/CAT/D	5.32987	4.67873e-06	1.10502e-05	4.42392e-06	2.32288	1004	191	10	137	52	2
6	32689850	rs7774573	ALC:INC/SPB:M/CAT/A	5.323	4.75336e-06	1.81016e-05	6.25416e-06	3.09704	916	71	1	139	25	1
11	83842929	rs10898157	ALC:INC/SPB:M/CAT/A	5.32296	4.75379e-06	3.51797e-06	4.32273e-06	0.555894	334	445	209	79	66	20
11	83842929	rs10898157	ALC:INC/SPB:M/GLM:PC1/A	5.32274	4.75379e-06	3.51797e-06	4.32273e-06	0.555894	334	445	209	79	66	20
1	101384574	rs6577246	ALC:INC/SPB:F/CAT/CD	5.31916	4.79556e-06	8.05505e-05		1.15108	129	80	11	17	3	6

## Sheet: Table S2B
Table S2B. Genome wide association study results for AD-related phenotypes (p-values < 5×10-6 and replicated associations)
Chr	Position (hg38)	SNP	Test name	-Log p-value (screening)	P-value (linear model)	Effect size (linear model)	P-value (GLM quasipoisson)	Effect size (GLM quasipoisson)	Cases_AA	Cases_Aa	Cases_aa	MAF	Mean_AA	Mean_Aa	Mean_aa	CVAR_AA1	CVAR_Aa2	CVAR_aa3	Replication	-log p-value (original results)
2	60356235	rs76529516	ALC:ATF/SPB/LM:VERS/CD	12.0862	8.19888e-13	249.456	4.10408e-10	1.20935	187	5	0	0.0130208	93.77	356.26	NA	1.38884	1.67742	NA
2	60356235	rs76529516	ALC:ATF/SPB/LM:VERS/D	12.0862	8.19888e-13	249.456	4.10408e-10	1.20935	187	5	0	0.0130208	93.77	356.26	NA	1.38884	1.67742	NA
2	60356235	rs76529516	ALC:ATF/SPB/LM:VERS/A	11.1983	6.33399e-12	244.687	1.29399e-08	1.16332	187	5	0	0.0130208	93.77	356.26	NA	1.38884	1.67742	NA
2	60356235	rs76529516	ALC:ATF/SPB/GLM:VERS/CD	9.38678	8.19888e-13	249.456	4.10408e-10	1.20935	187	5	0	0.0130208	93.77	356.26	NA	1.38884	1.67742	NA
2	60356235	rs76529516	ALC:ATF/SPB/GLM:VERS/D	9.38678	8.19888e-13	249.456	4.10408e-10	1.20935	187	5	0	0.0130208	93.77	356.26	NA	1.38884	1.67742	NA
2	60356235	rs76529516	ALC:ATF/SPB:M/GLM:VERS/CD	8.42835	2.47606e-11	240.892	3.7295e-09	1.13355	161	5	0	0.0150602	98.0906	356.26	NA	1.39772	1.67742	NA
2	60356235	rs76529516	ALC:ATF/SPB:M/GLM:VERS/D	8.42835	2.47606e-11	240.892	3.7295e-09	1.13355	161	5	0	0.0150602	98.0906	356.26	NA	1.39772	1.67742	NA
2	60356235	rs76529516	ALC:ATF/SPB/GLM:VERS/A	7.88807	6.33399e-12	244.687	1.29399e-08	1.16332	187	5	0	0.0130208	93.77	356.26	NA	1.38884	1.67742	NA
2	60356235	rs76529516	ALC:ATF/SPB:M/GLM:VERS/A	7.07449	1.58991e-10	235.294	8.4238e-08	1.0831	161	5	0	0.0150602	98.0906	356.26	NA	1.39772	1.67742	NA
2	75167644	rs7603694	ALC:PACS/SPB/LM/R	10.5147	3.05682e-11	16.4497	4.72822e-07	1.72871	151	38	3	0.114583	3.76159	2.71053	20	0.940512	0.933696	1.62758
2	75167644	rs7603694	ALC:PACS/SPB/LM/CD	10.0134	9.69626e-11	1.38987	6.86067e-07	0.320975	151	38	3	0.114583	3.76159	2.71053	20	0.940512	0.933696	1.62758
2	75167644	rs7603694	ALC:PACS/SPB:M/GLM/R	7.12706	3.41065e-12	16.5767	7.46339e-08	1.76512	130	33	3	0.11747	3.56923	2.84848	20	0.967988	0.966	1.62758
2	75167644	rs7603694	ALC:PACS/SPB:M/GLM/CD	6.57904	2.03383e-11	1.91999	2.6361e-07	0.432278	130	33	3	0.11747	3.56923	2.84848	20	0.967988	0.966	1.62758
2	75167644	rs7603694	ALC:PACS/SPB/GLM/R	6.3253	3.05682e-11	16.4497	4.72822e-07	1.72871	151	38	3	0.114583	3.76159	2.71053	20	0.940512	0.933696	1.62758
2	75167644	rs7603694	ALC:PACS/SPB/GLM/CD	6.16363	9.69626e-11	1.38987	6.86067e-07	0.320975	151	38	3	0.114583	3.76159	2.71053	20	0.940512	0.933696	1.62758
17	71033963	rs59775162	ALC:PACS/SPB/LM/A	7.5218	3.00748e-08	5.05501	3.91073e-07	0.899708	168	21	2	0.065445	3.24405	7	16.5	0.899738	1.12962	0.933381
17	71033963	rs59775162	ALC:PACS/SPB:M/GLM/A	6.84164	8.41972e-09	5.68548	1.43999e-07	0.989481	146	18	1	0.0606061	3.15068	6.83333	29	0.921604	1.15359	NA
17	71033963	rs59775162	ALC:PACS/SPB/LM/CD	6.80236	1.57632e-07	4.59056	3.90712e-06	0.791715	168	21	2	0.065445	3.24405	7	16.5	0.899738	1.12962	0.933381
17	71033963	rs59775162	ALC:PACS/SPB:M/GLM/CD	6.72264	6.0115e-12	5.45666	1.8939e-07	0.931913	146	18	1	0.0606061	3.15068	6.83333	29	0.921604	1.15359	NA
17	71033963	rs59775162	ALC:PACS/SPB/GLM/A	6.40774	3.00748e-08	5.05501	3.91073e-07	0.899708	168	21	2	0.065445	3.24405	7	16.5	0.899738	1.12962	0.933381
17	71033963	rs59775162	ALC:OCSD/SPB/LM/A	6.28065	5.24028e-07	12.4072	5.92321e-06	0.751655	168	21	2	0.065445	10.5179	19.9524	42	0.957379	1.37018	3.71231
17	71033963	rs59775162	ALC:PACS/SPB/LM/D	5.58475	2.60167e-06	4.58204	6.39001e-06	0.880641	168	21	2	0.065445	3.24405	7	16.5	0.899738	1.12962	0.933381
17	71033963	rs59775162	ALC:OCSD/SPB/LM/CD	5.43815	3.6463e-06	11.2672	7.83519e-05	0.664992	168	21	2	0.065445	10.5179	19.9524	42	0.957379	1.37018	3.71231
17	71033963	rs59775162	ALC:PACS/SPB/GLM/CD	5.40814	1.57632e-07	4.59056	3.90712e-06	0.791715	168	21	2	0.065445	3.24405	7	16.5	0.899738	1.12962	0.933381
18	78934037	rs11872169	ALC:PACS/SPB/LM/R	10.3037	4.96957e-11	19.9	3.59805e-06	1.87607	140	50	2	0.140625	3.90714	2.74	23.5	0.949877	0.783268	3.02127
18	78934037	rs11872169	ALC:PACS/SPB/LM/CD	10.0314	9.30293e-11	0.593431	3.57573e-06	0.149181	140	50	2	0.140625	3.90714	2.74	23.5	0.949877	0.783268	3.02127
18	78934037	rs11872169	ALC:PACS/SPB:M/GLM/R	5.98542	6.37076e-12	20.0183	1.03415e-06	1.90948	120	44	2	0.144578	3.675	2.95455	23.5	0.965991	0.814426	3.02127
18	78934037	rs11872169	ALC:PACS/SPB/GLM/CD	5.44664	9.30293e-11	0.593431	3.57573e-06	0.149181	140	50	2	0.140625	3.90714	2.74	23.5	0.949877	0.783268	3.02127
18	78934037	rs11872169	ALC:PACS/SPB/GLM/R	5.44393	4.96957e-11	19.9	3.59805e-06	1.87607	140	50	2	0.140625	3.90714	2.74	23.5	0.949877	0.783268	3.02127
18	78934037	rs11872169	ALC:PACS/SPB:M/GLM/CD	5.42959	3.38255e-11	1.18837	3.71887e-06	0.293177	120	44	2	0.144578	3.675	2.95455	23.5	0.965991	0.814426	3.02127
8	69446892	rs10105764	ALC:PACS/SPB:M/GLM/R	5.96263	7.38391e-12	20.0123	1.08985e-06	1.90777	135	27	2	0.0945122	3.42963	3.77778	23.5	1.00353	0.718554	3.02127
8	69446892	rs10105764	ALC:PACS/SPB/LM/R	5.56644	2.71371e-06	10.4032	0.000136061	1.35902	157	29	4	0.0973684	3.57325	3.72414	14	0.942471	0.7255	1.18041
9	91445909	rs116985970	ALC:ATF/SPB/LM:VERS/A	9.82007	1.51332e-10	181.801	1.1084e-08	0.985217	185	6	1	0.0208333	94.8718	200.833	560	1.38432	0.952609	NA
9	91445909	rs116985970	ALC:ATF/SPB/LM:VERS/CD	8.88426	1.3054e-09	147.946	1.49825e-06	0.746123	185	6	1	0.0208333	94.8718	200.833	560	1.38432	0.952609	NA
9	91445909	rs116985970	ALC:ATF/SPB:M/GLM:VERS/A	8.75289	9.99337e-12	211.248	1.76647e-09	1.04324	160	5	1	0.0210843	99.0368	233.6	560	1.39069	1.07176	NA
9	91445909	rs116985970	ALC:ATF/SPB/GLM:VERS/A	7.9553	1.51332e-10	181.801	1.1084e-08	0.985217	185	6	1	0.0208333	94.8718	200.833	560	1.38432	0.952609	NA
9	91445909	rs116985970	ALC:ATF/SPB/LM:VERS/R	7.58999	2.57047e-08	439.326	6.23338e-05	1.53484	185	6	1	0.0208333	94.8718	200.833	560	1.38432	0.952609	NA
9	91445909	rs116985970	ALC:ATF/SPB:M/GLM:VERS/CD	6.18709	1.27903e-09	166.901	6.49993e-07	0.757945	160	5	1	0.0210843	99.0368	233.6	560	1.39069	1.07176	NA
9	91445909	rs116985970	ALC:ATF/SPB:M/GLM:VERS/D	6.12475	1.5553e-07	177.049	7.50321e-07	0.959263	160	5	1	0.0210843	99.0368	233.6	560	1.39069	1.07176	NA
9	91445909	rs116985970	ALC:ATF/SPB/GLM:VERS/CD	5.82441	1.3054e-09	147.946	1.49825e-06	0.746123	185	6	1	0.0208333	94.8718	200.833	560	1.38432	0.952609	NA
9	91445909	rs116985970	ALC:ATF/SPB/LM:VERS/D	5.75908	1.74148e-06	146.647	5.61732e-06	0.875408	185	6	1	0.0208333	94.8718	200.833	560	1.38432	0.952609	NA
9	91561032	rs76162685	ALC:ATF/SPB:M/GLM:VERS/A	8.75289	9.99337e-12	211.248	1.76647e-09	1.04324	160	5	1	0.0210843	99.0368	233.6	560	1.39069	1.07176	NA
9	91561032	rs76162685	ALC:ATF/SPB/LM:VERS/CD	7.96903	1.07392e-08	125.661	1.14212e-05	0.679707	184	7	1	0.0234375	95.2788	175	560	1.39102	0.856869	NA
9	91561032	rs76162685	ALC:ATF/SPB/LM:VERS/R	7.58999	2.57047e-08	439.326	6.23338e-05	1.53484	184	7	1	0.0234375	95.2788	175	560	1.39102	0.856869	NA
9	91561032	rs76162685	ALC:ATF/SPB/LM:VERS/A	7.58218	2.61707e-08	150.31	4.1761e-07	0.862803	184	7	1	0.0234375	95.2788	175	560	1.39102	0.856869	NA
9	91561032	rs76162685	ALC:ATF/SPB/GLM:VERS/A	6.37923	2.61707e-08	150.31	4.1761e-07	0.862803	184	7	1	0.0234375	95.2788	175	560	1.39102	0.856869	NA
9	91561032	rs76162685	ALC:ATF/SPB:M/GLM:VERS/CD	6.18709	1.27903e-09	166.901	6.49993e-07	0.757945	160	5	1	0.0210843	99.0368	233.6	560	1.39069	1.07176	NA
9	91561032	rs76162685	ALC:ATF/SPB:M/GLM:VERS/D	6.12475	1.5553e-07	177.049	7.50321e-07	0.959263	160	5	1	0.0210843	99.0368	233.6	560	1.39069	1.07176	NA
15	37192893	rs7171671	ALC:ATF/SPB/LM:VERS/R	10.7324	1.85183e-11	301.552	1.54847e-08	1.36091	156	33	3	0.101562	95.2628	98.1	406	1.36662	1.21847	1.6658
15	37192893	rs7171671	ALC:ATF/SPB/LM:VERS/CD	9.79962	1.58629e-10	47.5473	1.10164e-07	0.390513	156	33	3	0.101562	95.2628	98.1	406	1.36662	1.21847	1.6658
15	37192893	rs7171671	ALC:ATF/SPB/GLM:VERS/R	7.8101	1.85183e-11	301.552	1.54847e-08	1.36091	156	33	3	0.101562	95.2628	98.1	406	1.36662	1.21847	1.6658
15	37192893	rs7171671	ALC:ATF/SPB:M/GLM:VERS/R	7.23271	2.26693e-10	293.743	5.85177e-08	1.28994	135	28	3	0.10241	99.1821	105.939	406	1.37022	1.24818	1.6658
15	37192893	rs7171671	ALC:ATF/SPB/GLM:VERS/CD	6.95796	1.58629e-10	47.5473	1.10164e-07	0.390513	156	33	3	0.101562	95.2628	98.1	406	1.36662	1.21847	1.6658
15	37192893	rs7171671	ALC:ATF/SPB:M/GLM:VERS/CD	6.48283	1.60241e-09	54.846	3.28983e-07	0.416299	135	28	3	0.10241	99.1821	105.939	406	1.37022	1.24818	1.6658
15	37217663	rs8034579	ALC:ATF/SPB/LM:VERS/R	10.7324	1.85183e-11	301.552	1.54847e-08	1.36091	158	31	3	0.0963542	95.905	95.0097	406	1.37713	1.16556	1.6658
15	37217663	rs8034579	ALC:ATF/SPB/LM:VERS/CD	9.7715	1.6924e-10	45.3997	1.23064e-07	0.371428	158	31	3	0.0963542	95.905	95.0097	406	1.37713	1.16556	1.6658
15	37217663	rs8034579	ALC:ATF/SPB/GLM:VERS/R	7.8101	1.85183e-11	301.552	1.54847e-08	1.36091	158	31	3	0.0963542	95.905	95.0097	406	1.37713	1.16556	1.6658
15	37217663	rs8034579	ALC:ATF/SPB:M/GLM:VERS/R	7.23271	2.26693e-10	293.743	5.85177e-08	1.28994	137	26	3	0.0963855	99.8656	102.858	406	1.38253	1.18661	1.6658
15	37217663	rs8034579	ALC:ATF/SPB/GLM:VERS/CD	6.90987	1.6924e-10	45.3997	1.23064e-07	0.371428	158	31	3	0.0963542	95.905	95.0097	406	1.37713	1.16556	1.6658
15	37217663	rs8034579	ALC:ATF/SPB:M/GLM:VERS/CD	6.37148	1.89927e-09	52.8047	4.25127e-07	0.397996	137	26	3	0.0963855	99.8656	102.858	406	1.38253	1.18661	1.6658
15	37216191	rs8028015	ALC:ATF/SPB/LM:VERS/R	10.7027	1.98276e-11	301.34	1.52367e-08	1.35879	157	31	3	0.0968586	96.4369	95.0097	406	1.38675	1.16556	1.6658
15	37216191	rs8028015	ALC:ATF/SPB/LM:VERS/CD	9.74272	1.80835e-10	45.0966	1.21271e-07	0.368365	157	31	3	0.0968586	96.4369	95.0097	406	1.38675	1.16556	1.6658
15	37216191	rs8028015	ALC:ATF/SPB/GLM:VERS/R	7.81711	1.98276e-11	301.34	1.52367e-08	1.35879	157	31	3	0.0968586	96.4369	95.0097	406	1.38675	1.16556	1.6658
15	37216191	rs8028015	ALC:ATF/SPB:M/GLM:VERS/R	7.24354	2.43699e-10	293.501	5.70763e-08	1.28768	136	26	3	0.0969697	100.509	102.858	406	1.3939	1.18661	1.6658
15	37216191	rs8028015	ALC:ATF/SPB/GLM:VERS/CD	6.91624	1.80835e-10	45.0966	1.21271e-07	0.368365	157	31	3	0.0968586	96.4369	95.0097	406	1.38675	1.16556	1.6658
15	37216191	rs8028015	ALC:ATF/SPB:M/GLM:VERS/CD	6.3771	2.05419e-09	52.4639	4.19661e-07	0.394752	136	26	3	0.0969697	100.509	102.858	406	1.3939	1.18661	1.6658
8	123710151	rs7002380	ALC:ATF/SPB/LM:VERS/CD	10.6887	2.04772e-11	235.471	3.76657e-09	1.16569	187	5	0	0.0130208	94.1299	342.8	NA	1.37783	1.55421	NA
8	123710151	rs7002380	ALC:ATF/SPB/LM:VERS/D	10.6887	2.04772e-11	235.471	3.76657e-09	1.16569	187	5	0	0.0130208	94.1299	342.8	NA	1.37783	1.55421	NA
8	123710151	rs7002380	ALC:ATF/SPB/LM:VERS/A	9.99148	1.01981e-10	230.97	6.81516e-08	1.12238	187	5	0	0.0130208	94.1299	342.8	NA	1.37783	1.55421	NA
8	123710151	rs7002380	ALC:ATF/SPB/GLM:VERS/CD	8.42405	2.04772e-11	235.471	3.76657e-09	1.16569	187	5	0	0.0130208	94.1299	342.8	NA	1.37783	1.55421	NA
8	123710151	rs7002380	ALC:ATF/SPB/GLM:VERS/D	8.42405	2.04772e-11	235.471	3.76657e-09	1.16569	187	5	0	0.0130208	94.1299	342.8	NA	1.37783	1.55421	NA
8	123710151	rs7002380	ALC:ATF/SPB:M/GLM:VERS/CD	7.53093	4.6256e-10	226.791	2.94493e-08	1.08917	161	5	0	0.0150602	98.5086	342.8	NA	1.38649	1.55421	NA
8	123710151	rs7002380	ALC:ATF/SPB:M/GLM:VERS/D	7.53093	4.6256e-10	226.791	2.94493e-08	1.08917	161	5	0	0.0150602	98.5086	342.8	NA	1.38649	1.55421	NA
8	123710151	rs7002380	ALC:ATF/SPB/GLM:VERS/A	7.16652	1.01981e-10	230.97	6.81516e-08	1.12238	187	5	0	0.0130208	94.1299	342.8	NA	1.37783	1.55421	NA
8	123710151	rs7002380	ALC:ATF/SPB:M/GLM:VERS/A	6.40016	1.97287e-09	221.521	3.97964e-07	1.04184	161	5	0	0.0150602	98.5086	342.8	NA	1.38649	1.55421	NA
1	99827322	rs12042183	ALC:PACS/SPB/LM/R	9.4777	3.32888e-10	25.4444	3.74392e-05	2.09878	168	21	1	0.0605263	3.64881	2.80952	29	0.924697	1.08043	NA
1	99827322	rs12042183	ALC:PACS/SPB/LM/CD	8.74255	1.80905e-09	1.44681	0.000114432	0.335021	168	21	1	0.0605263	3.64881	2.80952	29	0.924697	1.08043	NA
2	187250340	rs79413341	ALC:PACS/SPB/LM/R	9.49223	3.21937e-10	25.4497	3.71097e-05	2.10027	158	31	1	0.0868421	3.61392	3.22581	29	0.928695	0.926819	NA
2	187250340	rs79413341	ALC:PACS/SPB/LM/CD	8.61977	2.40009e-09	1.24438	0.000179194	0.300757	158	31	1	0.0868421	3.61392	3.22581	29	0.928695	0.926819	NA
7	155258449	rs6959431	ALC:OCSD/SPB:F/GLM/CD	10.3535	4.36652e-06	-4.73171	4.431e-11	-0.322402	10	12	4	0.384615	25.1	4.16667	24.75	2.32061	0.945402	3.10387
4	23485481	rs756516	ALC:ATF/SPB/LM:VERS/CD	10.3452	4.51623e-11	115.53	3.07149e-08	0.715501	177	14	1	0.0416667	91.9553	177.157	560	1.33125	1.36878	NA
4	23485481	rs756516	ALC:ATF/SPB/LM:VERS/A	9.20991	6.1672e-10	125.414	2.69e-09	0.8172	177	14	1	0.0416667	91.9553	177.157	560	1.33125	1.36878	NA
4	23485481	rs756516	ALC:ATF/SPB/GLM:VERS/A	8.57025	6.1672e-10	125.414	2.69e-09	0.8172	177	14	1	0.0416667	91.9553	177.157	560	1.33125	1.36878	NA
4	23485481	rs756516	ALC:ATF/SPB/LM:VERS/R	7.58999	2.57047e-08	439.326	6.23338e-05	1.53484	177	14	1	0.0416667	91.9553	177.157	560	1.33125	1.36878	NA
4	23485481	rs756516	ALC:ATF/SPB/GLM:VERS/CD	7.51265	4.51623e-11	115.53	3.07149e-08	0.715501	177	14	1	0.0416667	91.9553	177.157	560	1.33125	1.36878	NA
4	23485481	rs756516	ALC:ATF/SPB:M/GLM:VERS/A	7.41351	1.7281e-08	118.432	3.85914e-08	0.750494	151	14	1	0.0481928	96.2496	177.157	560	1.33257	1.36878	NA
4	23485481	rs756516	ALC:ATF/SPB/GLM:VERS/D	6.5414	4.18714e-07	107.587	2.87472e-07	0.759473	177	14	1	0.0416667	91.9553	177.157	560	1.33125	1.36878	NA
4	23485481	rs756516	ALC:ATF/SPB:M/GLM:VERS/CD	6.48763	1.28389e-09	109.85	3.25361e-07	0.662979	151	14	1	0.0481928	96.2496	177.157	560	1.33257	1.36878	NA
4	23485481	rs756516	ALC:ATF/SPB/LM:VERS/D	6.37808	4.18714e-07	107.587	2.87472e-07	0.759473	177	14	1	0.0416667	91.9553	177.157	560	1.33125	1.36878	NA
4	23485481	rs756516	ALC:ATF/SPB:M/GLM:VERS/D	5.57127	4.88897e-06	101.188	2.6837e-06	0.696	151	14	1	0.0481928	96.2496	177.157	560	1.33257	1.36878	NA
20	51535548	rs73130842	ALC:PACS/SPB/LM/R	10.3037	4.96957e-11	19.9	3.59805e-06	1.87607	162	28	2	0.0833333	3.55556	3.85714	23.5	0.919374	0.824131	3.02127
20	51535548	rs73130842	ALC:PACS/SPB/LM/CD	9.38227	4.14695e-10	2.61413	2.07004e-05	0.537161	162	28	2	0.0833333	3.55556	3.85714	23.5	0.919374	0.824131	3.02127
20	51535548	rs73130842	ALC:PACS/SPB/GLM/R	5.44393	4.96957e-11	19.9	3.59805e-06	1.87607	162	28	2	0.0833333	3.55556	3.85714	23.5	0.919374	0.824131	3.02127
19	12668057	rs56173714	ALC:ATF/SPB/LM:VERS/R	10.2748	5.31127e-11	362.5	7.11227e-07	1.40735	173	17	2	0.0546875	96.7254	95.4588	480	1.28304	1.32877	4.24264
19	12668057	rs56173714	ALC:ATF/SPB/LM:VERS/CD	9.33546	4.6189e-10	56.9843	4.69603e-06	0.409121	173	17	2	0.0546875	96.7254	95.4588	480	1.28304	1.32877	4.24264
19	12668057	rs56173714	ALC:ATF/SPB/GLM:VERS/R	6.14799	5.31127e-11	362.5	7.11227e-07	1.40735	173	17	2	0.0546875	96.7254	95.4588	480	1.28304	1.32877	4.24264
19	12668057	rs56173714	ALC:PACS/SPB/LM/R	5.74955	1.7801e-06	14.8474	0.000354714	1.62232	173	17	2	0.0546875	3.71098	3.05882	18.5	0.889232	0.894874	1.24585
19	12668057	rs56173714	ALC:ATF/SPB:M/GLM:VERS/R	5.59423	7.20678e-10	351.653	2.54545e-06	1.31905	150	14	2	0.0542169	101.394	100.343	480	1.29227	1.29374	4.24264
19	12668057	rs56173714	ALC:ATF/SPB/GLM:VERS/CD	5.32827	4.6189e-10	56.9843	4.69603e-06	0.409121	173	17	2	0.0546875	96.7254	95.4588	480	1.28304	1.32877	4.24264
8	13717137	rs12681268	ALC:OCSD/SPB:F/GLM/D	10.1582	5.39531e-06	-20.125	6.9474e-11	-2.0423	16	9	1	0.211538	23.125	3.33333	0	2.21311	0.853579	NA
8	13717137	rs12681268	ALC:OCSD/SPB:F/GLM/CD	9.75525	3.81901e-05	-16.682	1.75691e-10	-1.96872	16	9	1	0.211538	23.125	3.33333	0	2.21311	0.853579	NA
8	13717137	rs12681268	ALC:OCSD/SPB:F/GLM/A	6.65545	0.000104317	-16.0532	2.21083e-07	-1.92952	16	9	1	0.211538	23.125	3.33333	0	2.21311	0.853579	NA
3	120136563	rs923380	ALC:PACS/SPB:M/GLM/CD	5.88597	9.70941e-11	4.5981	1.30027e-06	0.836219	144	20	1	0.0666667	3.23611	6.05	29	0.988059	0.910467	NA
3	120136563	rs923380	ALC:PACS/SPB:M/GLM/A	5.52202	6.95879e-07	4.71753	3.00592e-06	0.867045	144	20	1	0.0666667	3.23611	6.05	29	0.988059	0.910467	NA
5	59041654	rs1353747	ALC:PACS/SPB/LM/R	9.21305	6.12285e-10	15.4339	1.79285e-06	1.67296	160	29	3	0.0911458	3.425	4.34483	19	0.937732	0.931972	1.35714
5	59041654	rs1353747	ALC:PACS/SPB/LM/CD	8.56266	2.73743e-09	3.08335	5.11442e-06	0.60561	160	29	3	0.0911458	3.425	4.34483	19	0.937732	0.931972	1.35714
5	59041654	rs1353747	ALC:PACS/SPB:M/GLM/R	6.46066	9.8217e-11	15.5583	3.46209e-07	1.70847	137	26	3	0.0963855	3.31387	4.11538	19	0.988812	0.910578	1.35714
5	59041654	rs1353747	ALC:PACS/SPB:M/GLM/CD	5.9366	5.43864e-10	3.20023	1.15719e-06	0.633939	137	26	3	0.0963855	3.31387	4.11538	19	0.988812	0.910578	1.35714
5	59041654	rs1353747	ALC:PACS/SPB/GLM/R	5.74646	6.12285e-10	15.4339	1.79285e-06	1.67296	160	29	3	0.0911458	3.425	4.34483	19	0.937732	0.931972	1.35714
12	32056008	rs11051762	ALC:OCSD/SPB:F/GLM/CD	9.88467	3.7784e-07	-4.06667	1.30416e-10	-0.276737	11	12	3	0.346154	23.8182	3.83333	30.6667	2.58096	0.731997	8.73225
9	105367199	rs11506819	ALC:PACS/SPB/LM/CD	9.03185	9.29286e-10	11.9027	4.82628e-07	1.48237	187	5	0	0.0130208	3.49733	15.4	NA	0.934207	1.31427	NA
9	105367199	rs11506819	ALC:PACS/SPB/LM/D	9.03185	9.29286e-10	11.9027	4.82628e-07	1.48237	187	5	0	0.0130208	3.49733	15.4	NA	0.934207	1.31427	NA
9	105367199	rs11506819	ALC:PACS/SPB/LM/A	8.5615	2.74474e-09	11.7456	3.49585e-06	1.43845	187	5	0	0.0130208	3.49733	15.4	NA	0.934207	1.31427	NA
9	105367199	rs11506819	ALC:PACS/SPB:M/GLM/CD	7.21407	1.38715e-10	12.0398	6.10838e-08	1.52235	161	5	0	0.0150602	3.36025	15.4	NA	0.973805	1.31427	NA
9	105367199	rs11506819	ALC:PACS/SPB:M/GLM/D	7.21407	1.38715e-10	12.0398	6.10838e-08	1.52235	161	5	0	0.0150602	3.36025	15.4	NA	0.973805	1.31427	NA
9	105367199	rs11506819	ALC:PACS/SPB/GLM/CD	6.31639	9.29286e-10	11.9027	4.82628e-07	1.48237	187	5	0	0.0130208	3.49733	15.4	NA	0.934207	1.31427	NA
9	105367199	rs11506819	ALC:PACS/SPB/GLM/D	6.31639	9.29286e-10	11.9027	4.82628e-07	1.48237	187	5	0	0.0130208	3.49733	15.4	NA	0.934207	1.31427	NA
9	105367199	rs11506819	ALC:PACS/SPB:M/GLM/A	5.91681	6.19822e-10	11.8557	1.21114e-06	1.46901	161	5	0	0.0150602	3.36025	15.4	NA	0.973805	1.31427	NA
9	105367199	rs11506819	ALC:PACS/SPB/GLM/A	5.45645	2.74474e-09	11.7456	3.49585e-06	1.43845	187	5	0	0.0130208	3.49733	15.4	NA	0.934207	1.31427	NA
13	101470554	rs78807351	ALC:PACS/SPB:F/GLM/CD	9.81239	1.38277e-09	12.5909	1.54031e-10	1.8288	22	4	0	0.0769231	2.40909	15	NA	1.01925	5.09525	NA
13	101470554	rs78807351	ALC:PACS/SPB:F/GLM/D	9.81239	1.38277e-09	12.5909	1.54031e-10	1.8288	22	4	0	0.0769231	2.40909	15	NA	1.01925	5.09525	NA
8	19756502	rs10101032	ALC:PACS/SPB:F/GLM/R	9.81239	1.38277e-09	12.5909	1.54031e-10	1.8288	13	9	4	0.326923	2.15385	2.77778	15	0.949926	1.07359	5.09525
8	19756502	rs10101032	ALC:PACS/SPB:F/GLM/CD	8.74575	1.41836e-08	5.12188	1.79578e-09	1.0637	13	9	4	0.326923	2.15385	2.77778	15	0.949926	1.07359	5.09525
8	19756502	rs10101032	ALC:PACS/SPB:F/GLM/A	7.02004	1.02375e-05	6.21513	9.54907e-08	1.30442	13	9	4	0.326923	2.15385	2.77778	15	0.949926	1.07359	5.09525
11	74418088	rs645184	ALC:PACS/SPB:F/GLM/R	9.81239	1.38277e-09	12.5909	1.54031e-10	1.8288	13	9	4	0.326923	1.92308	3.11111	15	0.814328	1.34366	5.09525
11	74418088	rs645184	ALC:PACS/SPB:F/GLM/CD	8.84897	9.03197e-09	5.33795	1.4159e-09	1.11149	13	9	4	0.326923	1.92308	3.11111	15	0.814328	1.34366	5.09525
11	74418088	rs645184	ALC:PACS/SPB:F/GLM/A	7.60548	3.4192e-06	6.47731	2.48037e-08	1.36264	13	9	4	0.326923	1.92308	3.11111	15	0.814328	1.34366	5.09525
4	20959615	rs17635274	ALC:PACS/SPB/LM/A	8.5615	2.74474e-09	11.7456	2.8597e-06	1.43845	188	3	1	0.0130208	3.63298	6.33333	29	0.892042	0.973399	NA
4	20959615	rs17635274	ALC:PACS/SPB/LM/R	8.34247	4.54493e-09	25.3246	0.000115855	2.06564	188	3	1	0.0130208	3.63298	6.33333	29	0.892042	0.973399	NA
4	20959615	rs17635274	ALC:PACS/SPB/LM/CD	7.72085	1.90172e-08	8.43745	0.000347635	0.956023	188	3	1	0.0130208	3.63298	6.33333	29	0.892042	0.973399	NA
4	20959615	rs17635274	ALC:PACS/SPB:M/GLM/A	5.76841	1.57218e-10	15.7528	1.70445e-06	1.68632	164	1	1	0.00903614	3.59146	0	29	0.916756	NA	NA
4	20959615	rs17635274	ALC:PACS/SPB/GLM/A	5.54368	2.74474e-09	11.7456	2.8597e-06	1.43845	188	3	1	0.0130208	3.63298	6.33333	29	0.892042	0.973399	NA
12	12993534	rs850946	ALC:PACS/SPB/LM/CD	8.85363	1.40079e-09	5.58762	4.39021e-05	0.868757	179	12	1	0.0364583	3.48045	6.58333	29	0.854548	1.80139	NA
12	12993534	rs850946	ALC:PACS/SPB/LM/R	8.34247	4.54493e-09	25.3246	0.000115855	2.06564	179	12	1	0.0364583	3.48045	6.58333	29	0.854548	1.80139	NA
12	12993534	rs850946	ALC:PACS/SPB/LM/A	6.61699	2.41552e-07	6.20463	7.08087e-06	1.00526	179	12	1	0.0364583	3.48045	6.58333	29	0.854548	1.80139	NA
12	12993534	rs850946	ALC:PACS/SPB:M/GLM/A	5.68577	6.19765e-08	6.32974	2.06173e-06	1.04082	153	12	1	0.0421687	3.33333	6.58333	29	0.866382	1.80139	NA
11	99969184	rs17134786	ALC:PACS/SPB:F/GLM/CD	9.68464	4.50716e-08	11.15	2.06708e-10	1.86238	20	5	0	0.1	2.05	13.2	NA	0.947453	2.77052	NA
11	99969184	rs17134786	ALC:PACS/SPB:F/GLM/D	9.68464	4.50716e-08	11.15	2.06708e-10	1.86238	20	5	0	0.1	2.05	13.2	NA	0.947453	2.77052	NA
11	61080671	rs3016176	ALC:ATF/SPB:M/GLM:VERS/CD	7.82606	2.15225e-10	-4.48195	1.4926e-08	-0.0411803	122	42	2	0.138554	112.439	69.604	466.5	1.31569	1.59072	4.96038
11	61080671	rs3016176	ALC:ATF/SPB/GLM:VERS/CD	7.05878	1.65297e-07	-13.2865	8.73415e-08	-0.132042	137	52	3	0.151042	109.01	65.6129	323.333	1.32229	1.60229	1.25941
11	61080671	rs3016176	ALC:ATF/SPB/LM:VERS/CD	6.78173	1.65297e-07	-13.2865	8.73415e-08	-0.132042	137	52	3	0.151042	109.01	65.6129	323.333	1.32229	1.60229	1.25941
5	52875789	rs11948124	ALC:OCSD/SPB/LM/R	7.29714	5.04499e-08	18.3483	1.8299e-06	1.00158	112	66	13	0.240838	10.9821	10.0909	29	0.976763	0.960958	1.94416
5	52875789	rs11948124	ALC:OCSD/SPB:M/GLM/R	7.01613	2.18728e-10	23.3645	9.63542e-08	1.20944	95	60	10	0.242424	10.5789	8.91667	33.3	0.946324	0.944303	2.99029
5	52875789	rs11948124	ALC:OCSD/SPB/LM/CD	6.48817	3.2496e-07	4.41268	1.02036e-05	0.338871	112	66	13	0.240838	10.9821	10.0909	29	0.976763	0.960958	1.94416
5	52875789	rs11948124	ALC:OCSD/SPB:M/GLM/CD	6.42609	1.20668e-09	4.78465	3.74898e-07	0.384255	95	60	10	0.242424	10.5789	8.91667	33.3	0.946324	0.944303	2.99029
5	52875789	rs11948124	ALC:OCSD/SPB/GLM/R	5.73757	5.04499e-08	18.3483	1.8299e-06	1.00158	112	66	13	0.240838	10.9821	10.0909	29	0.976763	0.960958	1.94416
11	61073809	rs2905495	ALC:ATF/SPB:M/GLM:VERS/CD	7.78307	2.33777e-10	-4.59184	1.6479e-08	-0.0424698	120	44	2	0.144578	113.046	69.8948	466.5	1.31442	1.62679	4.96038
11	61073809	rs2905495	ALC:ATF/SPB/GLM:VERS/CD	6.9937	1.8297e-07	-13.1534	1.0146e-07	-0.131152	135	54	3	0.15625	109.499	65.9976	323.333	1.32057	1.63339	1.25941
11	61073809	rs2905495	ALC:ATF/SPB/LM:VERS/CD	6.73762	1.8297e-07	-13.1534	1.0146e-07	-0.131152	135	54	3	0.15625	109.499	65.9976	323.333	1.32057	1.63339	1.25941
8	14321379	rs117973005	ALC:PACS/SPB/LM/CD	8.74816	1.78583e-09	8.82878	1.17176e-07	1.28141	183	9	0	0.0234375	3.39344	12.2222	NA	0.935716	1.23498	NA
8	14321379	rs117973005	ALC:PACS/SPB/LM/D	8.74816	1.78583e-09	8.82878	1.17176e-07	1.28141	183	9	0	0.0234375	3.39344	12.2222	NA	0.935716	1.23498	NA
8	14321379	rs117973005	ALC:PACS/SPB/LM/A	8.21952	6.03222e-09	8.61689	1.46947e-06	1.22084	183	9	0	0.0234375	3.39344	12.2222	NA	0.935716	1.23498	NA
8	14321379	rs117973005	ALC:PACS/SPB:M/GLM/CD	8.11361	2.35163e-10	8.98655	7.69828e-09	1.32902	157	9	0	0.0271084	3.23567	12.2222	NA	0.98415	1.23498	NA
8	14321379	rs117973005	ALC:PACS/SPB:M/GLM/D	8.11361	2.35163e-10	8.98655	7.69828e-09	1.32902	157	9	0	0.0271084	3.23567	12.2222	NA	0.98415	1.23498	NA
8	14321379	rs117973005	ALC:PACS/SPB/GLM/CD	6.93116	1.78583e-09	8.82878	1.17176e-07	1.28141	183	9	0	0.0234375	3.39344	12.2222	NA	0.935716	1.23498	NA
8	14321379	rs117973005	ALC:PACS/SPB/GLM/D	6.93116	1.78583e-09	8.82878	1.17176e-07	1.28141	183	9	0	0.0234375	3.39344	12.2222	NA	0.935716	1.23498	NA
8	14321379	rs117973005	ALC:PACS/SPB:M/GLM/A	6.39323	1.27043e-09	8.73615	4.04365e-07	1.25448	157	9	0	0.0271084	3.23567	12.2222	NA	0.98415	1.23498	NA
8	14321379	rs117973005	ALC:PACS/SPB/GLM/A	5.83284	6.03222e-09	8.61689	1.46947e-06	1.22084	183	9	0	0.0234375	3.39344	12.2222	NA	0.935716	1.23498	NA
7	106311220	rs60409240	ALC:ATF/SPB/LM:VERS/R	9.50792	3.10515e-10	349.205	1.89738e-06	1.37738	143	47	2	0.132812	96.0449	98.8909	467	1.27286	1.2789	5.00332
7	106311220	rs60409240	ALC:ATF/SPB/LM:VERS/CD	8.64787	2.24975e-09	35.6358	1.03198e-05	0.314255	143	47	2	0.132812	96.0449	98.8909	467	1.27286	1.2789	5.00332
7	106311220	rs60409240	ALC:ATF/SPB/GLM:VERS/R	5.72185	3.10515e-10	349.205	1.89738e-06	1.37738	143	47	2	0.132812	96.0449	98.8909	467	1.27286	1.2789	5.00332
21	28347493	rs1236415	ALC:ATF/SPB/LM:VERS/R	9.47924	3.31711e-10	348.693	1.96359e-06	1.37621	138	52	2	0.145833	99.4593	89.575	466.5	1.26021	1.34152	4.96038
21	28347493	rs1236415	ALC:ATF/SPB/LM:VERS/CD	8.89496	1.27361e-09	13.4142	4.3161e-06	0.12258	138	52	2	0.145833	99.4593	89.575	466.5	1.26021	1.34152	4.96038
21	28347493	rs1236415	ALC:ATF/SPB/GLM:VERS/R	5.70695	3.31711e-10	348.693	1.96359e-06	1.37621	138	52	2	0.145833	99.4593	89.575	466.5	1.26021	1.34152	4.96038
21	28347493	rs1236415	ALC:ATF/SPB/GLM:VERS/CD	5.36491	1.27361e-09	13.4142	4.3161e-06	0.12258	138	52	2	0.145833	99.4593	89.575	466.5	1.26021	1.34152	4.96038
5	58044647	rs114272595	ALC:ATF/SPB/LM:VERS/R	9.47924	3.31711e-10	348.693	1.96359e-06	1.37621	178	12	2	0.0416667	97.0415	92.4917	466.5	1.24733	2.70493	4.96038
5	58044647	rs114272595	ALC:ATF/SPB/LM:VERS/CD	8.57793	2.64281e-09	77.1582	1.20614e-05	0.517666	178	12	2	0.0416667	97.0415	92.4917	466.5	1.24733	2.70493	4.96038
5	58044647	rs114272595	ALC:ATF/SPB/GLM:VERS/R	5.70695	3.31711e-10	348.693	1.96359e-06	1.37621	178	12	2	0.0416667	97.0415	92.4917	466.5	1.24733	2.70493	4.96038
5	58044647	rs114272595	ALC:ATF/SPB/GLM:VERS/A	5.41068	4.71827e-06	93.8389	3.88437e-06	0.700275	178	12	2	0.0416667	97.0415	92.4917	466.5	1.24733	2.70493	4.96038
5	58044647	rs114272595	ALC:ATF/SPB/LM:VERS/A	5.32622	4.71827e-06	93.8389	3.88437e-06	0.700275	178	12	2	0.0416667	97.0415	92.4917	466.5	1.24733	2.70493	4.96038
6	137690898	rs74648690	ALC:PACS/SPB/LM/R	8.34247	4.54493e-09	25.3246	0.000115855	2.06564	180	11	1	0.0338542	3.53333	6	29	0.929458	0.803219	NA
6	137690898	rs74648690	ALC:PACS/SPB/LM/CD	8.25945	5.50242e-09	5.27665	7.60438e-05	0.828997	180	11	1	0.0338542	3.53333	6	29	0.929458	0.803219	NA
6	137690898	rs74648690	ALC:PACS/SPB:M/GLM/A	5.98144	3.3473e-08	7.24441	1.04365e-06	1.12493	156	9	1	0.0331325	3.39103	6.66667	29	0.967236	0.828493	NA
6	137690898	rs74648690	ALC:PACS/SPB/LM/A	5.69467	2.01992e-06	5.93199	2.24957e-05	0.972603	180	11	1	0.0338542	3.53333	6	29	0.929458	0.803219	NA
2	1737400	rs114360452	ALC:PACS/SPB/LM/CD	8.60863	2.46247e-09	12.9628	1.89043e-06	1.54002	188	4	0	0.0104167	3.53723	16.5	NA	0.92463	1.34572	NA
2	1737400	rs114360452	ALC:PACS/SPB/LM/D	8.60863	2.46247e-09	12.9628	1.89043e-06	1.54002	188	4	0	0.0104167	3.53723	16.5	NA	0.92463	1.34572	NA
2	1737400	rs114360452	ALC:PACS/SPB/LM/A	8.20268	6.27072e-09	12.8263	9.14438e-06	1.50217	188	4	0	0.0104167	3.53723	16.5	NA	0.92463	1.34572	NA
2	1737400	rs114360452	ALC:PACS/SPB:M/GLM/CD	6.44637	4.35975e-10	13.0926	3.57792e-07	1.57741	162	4	0	0.0120482	3.40741	16.5	NA	0.957921	1.34572	NA
2	1737400	rs114360452	ALC:PACS/SPB:M/GLM/D	6.44637	4.35975e-10	13.0926	3.57792e-07	1.57741	162	4	0	0.0120482	3.40741	16.5	NA	0.957921	1.34572	NA
2	1737400	rs114360452	ALC:PACS/SPB/GLM/CD	5.72344	2.46247e-09	12.9628	1.89043e-06	1.54002	188	4	0	0.0104167	3.53723	16.5	NA	0.92463	1.34572	NA
2	1737400	rs114360452	ALC:PACS/SPB/GLM/D	5.72344	2.46247e-09	12.9628	1.89043e-06	1.54002	188	4	0	0.0104167	3.53723	16.5	NA	0.92463	1.34572	NA
2	1737400	rs114360452	ALC:PACS/SPB:M/GLM/A	5.43491	1.57965e-09	12.9329	3.67361e-06	1.53161	162	4	0	0.0120482	3.40741	16.5	NA	0.957921	1.34572	NA
17	9954695	rs3786107	ALC:PACS/SPB/LM/CD	9.20009	6.30833e-10	3.59243	7.73168e-06	0.718118	160	31	1	0.0859375	3.30625	5.58065	29	0.910624	0.977633	NA
17	9954695	rs3786107	ALC:PACS/SPB/LM/R	8.34247	4.54493e-09	25.3246	0.000115855	2.06564	160	31	1	0.0859375	3.30625	5.58065	29	0.910624	0.977633	NA
8	78500209	rs11787051	ALC:PACS/SPB/LM/CD	8.46518	3.42629e-09	4.21025	4.97559e-05	0.752578	173	18	1	0.0520833	3.46821	5.66667	29	0.913902	0.915015	NA
8	78500209	rs11787051	ALC:PACS/SPB/LM/R	8.34247	4.54493e-09	25.3246	0.000115855	2.06564	173	18	1	0.0520833	3.46821	5.66667	29	0.913902	0.915015	NA
1	234337336	rs12075141	ALC:ATF/SPB/LM:VERS/CD	9.21684	6.06954e-10	201.251	3.0118e-08	1.05577	186	6	0	0.015625	93.8725	309.333	NA	1.37549	1.43495	NA
1	234337336	rs12075141	ALC:ATF/SPB/LM:VERS/D	9.21684	6.06954e-10	201.251	3.0118e-08	1.05577	186	6	0	0.015625	93.8725	309.333	NA	1.37549	1.43495	NA
1	234337336	rs12075141	ALC:ATF/SPB/LM:VERS/A	8.64878	2.24502e-09	196.31	3.66071e-07	1.00893	186	6	0	0.015625	93.8725	309.333	NA	1.37549	1.43495	NA
1	234337336	rs12075141	ALC:ATF/SPB/GLM:VERS/CD	7.52117	6.06954e-10	201.251	3.0118e-08	1.05577	186	6	0	0.015625	93.8725	309.333	NA	1.37549	1.43495	NA
1	234337336	rs12075141	ALC:ATF/SPB/GLM:VERS/D	7.52117	6.06954e-10	201.251	3.0118e-08	1.05577	186	6	0	0.015625	93.8725	309.333	NA	1.37549	1.43495	NA
1	234337336	rs12075141	ALC:ATF/SPB:M/GLM:VERS/CD	6.58159	1.23946e-08	192.275	2.62068e-07	0.977117	160	6	0	0.0180723	98.2368	309.333	NA	1.38354	1.43495	NA
1	234337336	rs12075141	ALC:ATF/SPB:M/GLM:VERS/D	6.58159	1.23946e-08	192.275	2.62068e-07	0.977117	160	6	0	0.0180723	98.2368	309.333	NA	1.38354	1.43495	NA
1	234337336	rs12075141	ALC:ATF/SPB/GLM:VERS/A	6.43643	2.24502e-09	196.31	3.66071e-07	1.00893	186	6	0	0.015625	93.8725	309.333	NA	1.37549	1.43495	NA
1	234337336	rs12075141	ALC:ATF/SPB:M/GLM:VERS/A	5.63261	3.97075e-08	186.521	2.33021e-06	0.926362	160	6	0	0.0180723	98.2368	309.333	NA	1.38354	1.43495	NA
14	32399667	rs17098983	ALC:PACS/SPB/LM/R	7.8102	1.54812e-08	17.3737	4.29951e-05	1.75631	169	21	2	0.0651042	3.43195	5.19048	21	0.859353	1.18574	1.85616
14	32399667	rs17098983	ALC:PACS/SPB/LM/CD	7.66469	2.16425e-08	3.79951	4.78377e-05	0.690087	169	21	2	0.0651042	3.43195	5.19048	21	0.859353	1.18574	1.85616
14	32399667	rs17098983	ALC:PACS/SPB/LM/A	5.30741	4.92712e-06	4.18518	2.74713e-05	0.781152	169	21	2	0.0651042	3.43195	5.19048	21	0.859353	1.18574	1.85616
13	62296815	rs17228044	ALC:ATF/SPB/LM:VERS/CD	9.17304	6.71359e-10	184.928	5.2625e-09	1.06061	185	7	0	0.0182292	93.6918	283.329	NA	1.3721	1.35235	NA
13	62296815	rs17228044	ALC:ATF/SPB/LM:VERS/D	9.17304	6.71359e-10	184.928	5.2625e-09	1.06061	185	7	0	0.0182292	93.6918	283.329	NA	1.3721	1.35235	NA
13	62296815	rs17228044	ALC:ATF/SPB/LM:VERS/A	8.65425	2.21693e-09	181.346	8.18187e-08	1.02326	185	7	0	0.0182292	93.6918	283.329	NA	1.3721	1.35235	NA
13	62296815	rs17228044	ALC:ATF/SPB/GLM:VERS/CD	8.27881	6.71359e-10	184.928	5.2625e-09	1.06061	185	7	0	0.0182292	93.6918	283.329	NA	1.3721	1.35235	NA
13	62296815	rs17228044	ALC:ATF/SPB/GLM:VERS/D	8.27881	6.71359e-10	184.928	5.2625e-09	1.06061	185	7	0	0.0182292	93.6918	283.329	NA	1.3721	1.35235	NA
13	62296815	rs17228044	ALC:ATF/SPB:M/GLM:VERS/CD	7.45101	9.17266e-09	178.205	3.53986e-08	0.995977	159	7	0	0.0210843	98.054	283.329	NA	1.37959	1.35235	NA
13	62296815	rs17228044	ALC:ATF/SPB:M/GLM:VERS/D	7.45101	9.17266e-09	178.205	3.53986e-08	0.995977	159	7	0	0.0210843	98.054	283.329	NA	1.37959	1.35235	NA
13	62296815	rs17228044	ALC:ATF/SPB/GLM:VERS/A	7.08715	2.21693e-09	181.346	8.18187e-08	1.02326	185	7	0	0.0182292	93.6918	283.329	NA	1.3721	1.35235	NA
13	62296815	rs17228044	ALC:ATF/SPB:M/GLM:VERS/A	6.37981	2.70301e-08	174.116	4.17053e-07	0.955442	159	7	0	0.0210843	98.054	283.329	NA	1.37959	1.35235	NA
10	69097096	rs2229498	ALC:ATF/SPB/LM:VERS/R	6.47984	3.31252e-07	234.846	1.14256e-05	1.17278	142	47	3	0.138021	96.3265	98.2219	340.5	1.25285	1.40576	1.33432
10	69097096	rs2229498	ALC:ATF/SPB/LM:VERS/CD	5.65513	2.21245e-06	29.7501	6.7812e-05	0.266399	142	47	3	0.138021	96.3265	98.2219	340.5	1.25285	1.40576	1.33432
10	69097096	rs2229498	ALC:ATF/SPB:M/GLM:VERS/R	5.60906	6.75908e-10	352.167	2.46003e-06	1.3202	125	39	2	0.129518	101.132	101.832	480.5	1.26733	1.38549	4.27377
2	180010498	rs61432991	ALC:ATF/SPB/LM:VERS/R	9.16601	6.82328e-10	199.48	1.25324e-08	1.08365	120	66	6	0.203125	95.4098	91.7291	302.167	1.28068	1.50304	1.47767
2	180010498	rs61432991	ALC:ATF/SPB/LM:VERS/CD	8.25267	5.589e-09	31.0818	9.54843e-08	0.28198	120	66	6	0.203125	95.4098	91.7291	302.167	1.28068	1.50304	1.47767
2	180010498	rs61432991	ALC:ATF/SPB/GLM:VERS/R	7.90197	6.82328e-10	199.48	1.25324e-08	1.08365	120	66	6	0.203125	95.4098	91.7291	302.167	1.28068	1.50304	1.47767
2	180010498	rs61432991	ALC:ATF/SPB:M/GLM:VERS/R	7.1103	1.00521e-08	191.856	7.75712e-08	1.01352	100	60	6	0.216867	102.135	92.457	302.167	1.30528	1.47106	1.47767
2	180010498	rs61432991	ALC:ATF/SPB/GLM:VERS/CD	7.02007	5.589e-09	31.0818	9.54843e-08	0.28198	120	66	6	0.203125	95.4098	91.7291	302.167	1.28068	1.50304	1.47767
2	180010498	rs61432991	ALC:ATF/SPB:M/GLM:VERS/CD	6.44303	5.90393e-08	27.3553	3.60555e-07	0.237122	100	60	6	0.216867	102.135	92.457	302.167	1.30528	1.47106	1.47767
12	2419818	rs1009281	ALC:PACS/SPB:F/GLM/R	9.14278	5.68598e-08	10.9619	7.19817e-10	1.77459	13	8	5	0.346154	2.61538	1.625	13.2	1.09008	0.78659	2.77052
12	2419818	rs1009281	ALC:PACS/SPB:F/GLM/CD	8.36272	4.22801e-07	4.29703	4.33795e-09	0.914875	13	8	5	0.346154	2.61538	1.625	13.2	1.09008	0.78659	2.77052
12	2419818	rs1009281	ALC:PACS/SPB:F/GLM/A	5.91256	5.79583e-05	5.6732	1.22303e-06	1.21827	13	8	5	0.346154	2.61538	1.625	13.2	1.09008	0.78659	2.77052
1	236132906	rs6676840	ALC:PACS/SPB:F/GLM/D	9.14278	5.68598e-08	-10.9619	7.19817e-10	-1.77459	5	16	5	0.5	13.2	2.3125	2	2.77052	1.05965	0.707107
1	236132906	rs6676840	ALC:PACS/SPB:F/GLM/CD	7.84194	5.53128e-07	-5.6	1.43899e-08	-1.36185	5	16	5	0.5	13.2	2.3125	2	2.77052	1.05965	0.707107
7	15579780	rs12539017	ALC:PACS/SPB:F/GLM/D	9.14278	5.68598e-08	10.9619	7.19817e-10	1.77459	21	4	1	0.115385	2.2381	13.5	12	0.98237	2.47856	NA
7	15579780	rs12539017	ALC:PACS/SPB:F/GLM/CD	7.95659	5.08127e-07	7.84884	1.10513e-08	1.06031	21	4	1	0.115385	2.2381	13.5	12	0.98237	2.47856	NA
11	100009550	rs12420819	ALC:PACS/SPB:F/GLM/CD	9.14278	5.68598e-08	10.9619	7.19817e-10	1.77459	21	5	0	0.0961538	2.2381	13.2	NA	0.98237	2.77052	NA
11	100009550	rs12420819	ALC:PACS/SPB:F/GLM/D	9.14278	5.68598e-08	10.9619	7.19817e-10	1.77459	21	5	0	0.0961538	2.2381	13.2	NA	0.98237	2.77052	NA
17	55083275	rs74997942	ALC:PACS/SPB:F/GLM/CD	9.14278	5.68598e-08	10.9619	7.19817e-10	1.77459	21	5	0	0.0961538	2.2381	13.2	NA	0.98237	2.77052	NA
17	55083275	rs74997942	ALC:PACS/SPB:F/GLM/D	9.14278	5.68598e-08	10.9619	7.19817e-10	1.77459	21	5	0	0.0961538	2.2381	13.2	NA	0.98237	2.77052	NA
2	107063432	rs56358740	ALC:ATF/SPB/LM:VERS/R	9.12179	7.55461e-10	342.045	2.77586e-06	1.36093	155	34	2	0.0994764	97.7935	90.4206	460	1.21515	1.8444	3.25269
2	107063432	rs56358740	ALC:ATF/SPB/LM:VERS/CD	8.29255	5.09864e-09	27.9205	1.25077e-05	0.239397	155	34	2	0.0994764	97.7935	90.4206	460	1.21515	1.8444	3.25269
2	107063432	rs56358740	ALC:ATF/SPB/GLM:VERS/R	5.5566	7.55461e-10	342.045	2.77586e-06	1.36093	155	34	2	0.0994764	97.7935	90.4206	460	1.21515	1.8444	3.25269
8	4964939	rs12115171	ALC:PACS/SPB/LM/R	8.4425	3.6099e-09	25.3632	0.000108161	2.07618	183	7	1	0.0235602	3.59563	4.71429	29	0.871494	1.67676	NA
8	4964939	rs12115171	ALC:PACS/SPB/LM/CD	7.65079	2.23467e-08	5.39653	0.000478029	0.807396	183	7	1	0.0235602	3.59563	4.71429	29	0.871494	1.67676	NA
2	107063782	rs10496410	ALC:ATF/SPB/LM:VERS/R	9.1118	7.7304e-10	342.045	2.8384e-06	1.36093	156	34	2	0.0989583	98.2179	90.4206	460	1.22171	1.8444	3.25269
2	107063782	rs10496410	ALC:ATF/SPB/LM:VERS/CD	8.29334	5.08938e-09	27.4782	1.23342e-05	0.23526	156	34	2	0.0989583	98.2179	90.4206	460	1.22171	1.8444	3.25269
2	107063782	rs10496410	ALC:ATF/SPB/GLM:VERS/R	5.54693	7.7304e-10	342.045	2.8384e-06	1.36093	156	34	2	0.0989583	98.2179	90.4206	460	1.22171	1.8444	3.25269
6	2686833	rs9503252	ALC:ATF/SPB/LM:VERS/R	9.1118	7.7304e-10	342.045	2.8384e-06	1.36093	139	51	2	0.143229	99.5252	89.4567	460	1.25105	1.39487	3.25269
6	2686833	rs9503252	ALC:ATF/SPB/LM:VERS/CD	8.32318	4.7514e-09	18.7843	1.17959e-05	0.172424	139	51	2	0.143229	99.5252	89.4567	460	1.25105	1.39487	3.25269
6	2686833	rs9503252	ALC:ATF/SPB/GLM:VERS/R	5.54693	7.7304e-10	342.045	2.8384e-06	1.36093	139	51	2	0.143229	99.5252	89.4567	460	1.25105	1.39487	3.25269
7	158083756	rs11764121	ALC:ATF/SPB/LM:VERS/R	9.1118	7.7304e-10	342.045	2.8384e-06	1.36093	143	47	2	0.132812	91.5105	112.985	460	1.3707	1.16378	3.25269
7	158083756	rs11764121	ALC:ATF/SPB/LM:VERS/CD	8.8975	1.26621e-09	47.5048	1.78087e-06	0.403369	143	47	2	0.132812	91.5105	112.985	460	1.3707	1.16378	3.25269
7	158083756	rs11764121	ALC:ATF/SPB/GLM:VERS/CD	5.74937	1.26621e-09	47.5048	1.78087e-06	0.403369	143	47	2	0.132812	91.5105	112.985	460	1.3707	1.16378	3.25269
7	158083756	rs11764121	ALC:ATF/SPB/GLM:VERS/R	5.54693	7.7304e-10	342.045	2.8384e-06	1.36093	143	47	2	0.132812	91.5105	112.985	460	1.3707	1.16378	3.25269
7	158087519	rs12112370	ALC:ATF/SPB/LM:VERS/R	9.1118	7.7304e-10	342.045	2.8384e-06	1.36093	143	47	2	0.132812	91.5105	112.985	460	1.3707	1.16378	3.25269
7	158087519	rs12112370	ALC:ATF/SPB/LM:VERS/CD	8.8975	1.26621e-09	47.5048	1.78087e-06	0.403369	143	47	2	0.132812	91.5105	112.985	460	1.3707	1.16378	3.25269
7	158087519	rs12112370	ALC:ATF/SPB/GLM:VERS/CD	5.74937	1.26621e-09	47.5048	1.78087e-06	0.403369	143	47	2	0.132812	91.5105	112.985	460	1.3707	1.16378	3.25269
7	158087519	rs12112370	ALC:ATF/SPB/GLM:VERS/R	5.54693	7.7304e-10	342.045	2.8384e-06	1.36093	143	47	2	0.132812	91.5105	112.985	460	1.3707	1.16378	3.25269
10	122084988	rs10887063	ALC:PACS/SPB:F/GLM/CD	9.08985	4.12616e-07	5	8.13119e-10	0.802137	20	5	1	0.134615	2.35	13.2	0	1.03185	2.77052	NA
10	122084988	rs10887063	ALC:PACS/SPB:F/GLM/D	6.13455	4.40287e-05	8.65	7.3359e-07	1.54348	20	5	1	0.134615	2.35	13.2	0	1.03185	2.77052	NA
17	77829667	rs16970576	ALC:PACS/SPB/LM/CD	8.73901	1.82385e-09	3.11048	2.80475e-05	0.650896	156	35	1	0.0963542	3.33333	5.2	29	0.878279	1.02468	NA
17	77829667	rs16970576	ALC:PACS/SPB/LM/R	8.34247	4.54493e-09	25.3246	0.000115855	2.06564	156	35	1	0.0963542	3.33333	5.2	29	0.878279	1.02468	NA
17	77834597	rs4789006	ALC:PACS/SPB/LM/CD	8.63293	2.32849e-09	3.18728	3.36972e-05	0.65546	159	32	1	0.0885417	3.36478	5.21875	29	0.893071	0.983159	NA
17	77834597	rs4789006	ALC:PACS/SPB/LM/R	8.34247	4.54493e-09	25.3246	0.000115855	2.06564	159	32	1	0.0885417	3.36478	5.21875	29	0.893071	0.983159	NA
15	88902532	rs3743391	ALC:PACS/SPB/LM/R	8.35768	4.38856e-09	25.3333	0.000114252	2.06801	180	9	1	0.0289474	3.71111	2.77778	29	0.889617	1.19048	NA
15	88902532	rs3743391	ALC:PACS/SPB/LM/CD	7.55487	2.78698e-08	3.33248	0.00044473	0.597038	180	9	1	0.0289474	3.71111	2.77778	29	0.889617	1.19048	NA
15	92325701	rs7170164	ALC:PACS/SPB/LM/CD	8.7377	1.82937e-09	4.72184	1.83407e-05	0.804196	175	16	1	0.046875	3.45714	6.0625	29	0.96409	0.795617	NA
15	92325701	rs7170164	ALC:PACS/SPB/LM/R	8.34247	4.54493e-09	25.3246	0.000115855	2.06564	175	16	1	0.046875	3.45714	6.0625	29	0.96409	0.795617	NA
15	92325701	rs7170164	ALC:PACS/SPB/LM/A	5.62145	2.39083e-06	5.04007	1.43278e-05	0.880197	175	16	1	0.046875	3.45714	6.0625	29	0.96409	0.795617	NA
9	12739133	rs10733246	ALC:PACS/SPB/LM/R	8.35553	4.41028e-09	25.3474	0.00011694	2.07185	155	35	1	0.0968586	3.69032	3.48571	29	0.860989	1.0731	NA
9	12739133	rs10733246	ALC:PACS/SPB/LM/CD	7.47232	3.37039e-08	1.25477	0.000583083	0.297987	155	35	1	0.0968586	3.69032	3.48571	29	0.860989	1.0731	NA
11	35893504	rs7110138	ALC:PACS/SPB/LM/CD	6.7161	1.92266e-07	10.2599	2.18233e-05	1.36051	187	5	0	0.0130208	3.54011	13.8	NA	0.891271	1.38207	NA
11	35893504	rs7110138	ALC:PACS/SPB/LM/D	6.7161	1.92266e-07	10.2599	2.18233e-05	1.36051	187	5	0	0.0130208	3.54011	13.8	NA	0.891271	1.38207	NA
11	35893504	rs7110138	ALC:PACS/SPB/LM/A	6.45618	3.49799e-07	10.1245	5.70356e-05	1.32299	187	5	0	0.0130208	3.54011	13.8	NA	0.891271	1.38207	NA
11	35893504	rs7110138	ALC:PACS/SPB:M/GLM/CD	5.86713	1.03943e-09	12.8364	1.35791e-06	1.56033	162	4	0	0.0120482	3.41358	16.25	NA	0.916128	1.6858	NA
11	35893504	rs7110138	ALC:PACS/SPB:M/GLM/D	5.86713	1.03943e-09	12.8364	1.35791e-06	1.56033	162	4	0	0.0120482	3.41358	16.25	NA	0.916128	1.6858	NA
11	35930969	rs117664009	ALC:PACS/SPB:M/GLM/CD	5.86713	1.03943e-09	12.8364	1.35791e-06	1.56033	162	4	0	0.0120482	3.41358	16.25	NA	0.916128	1.6858	NA
11	35930969	rs117664009	ALC:PACS/SPB:M/GLM/D	5.86713	1.03943e-09	12.8364	1.35791e-06	1.56033	162	4	0	0.0120482	3.41358	16.25	NA	0.916128	1.6858	NA
11	35936850	rs77644113	ALC:PACS/SPB:M/GLM/CD	5.86713	1.03943e-09	12.8364	1.35791e-06	1.56033	162	4	0	0.0120482	3.41358	16.25	NA	0.916128	1.6858	NA
11	35936850	rs77644113	ALC:PACS/SPB:M/GLM/D	5.86713	1.03943e-09	12.8364	1.35791e-06	1.56033	162	4	0	0.0120482	3.41358	16.25	NA	0.916128	1.6858	NA
7	31576040	rs6963296	ALC:PACS/SPB:F/GLM/R	8.97851	2.98569e-07	9.95	1.05073e-09	1.76707	7	13	6	0.480769	2.28571	1.92308	12	1.03208	0.86785	2.318
7	31576040	rs6963296	ALC:PACS/SPB:F/GLM/CD	7.75563	2.61794e-06	4.65579	1.75537e-08	1.16539	7	13	6	0.480769	2.28571	1.92308	12	1.03208	0.86785	2.318
9	3579989	rs10758319	ALC:PACS/SPB:F/GLM/R	8.97851	2.98569e-07	9.95	1.05073e-09	1.76707	5	15	6	0.519231	1.8	2.13333	12	0.722897	0.999861	2.318
9	3579989	rs10758319	ALC:PACS/SPB:F/GLM/CD	7.72907	2.64264e-06	5.35088	1.86606e-08	1.36144	5	15	6	0.519231	1.8	2.13333	12	0.722897	0.999861	2.318
2	4890977	rs1371488	ALC:ATF/SPB:F/GLM:VERS/D	8.97766	8.4426e-06	60.2301	1.05278e-09	0.86441	16	9	1	0.211538	43.9062	105.211	93	2.81424	2.68973	NA
2	4890977	rs1371488	ALC:ATF/SPB:F/GLM:VERS/CD	7.94837	5.42766e-05	47.3436	1.12623e-08	0.611586	16	9	1	0.211538	43.9062	105.211	93	2.81424	2.68973	NA
1	3200253	rs72846890	ALC:PACS/SPB/LM/R	8.34247	4.54493e-09	25.3246	0.000115855	2.06564	168	23	1	0.0651042	3.72619	3.30435	29	0.879823	1.07241	NA
1	3200253	rs72846890	ALC:PACS/SPB/LM/CD	7.49053	3.23198e-08	1.63479	0.000526614	0.364074	168	23	1	0.0651042	3.72619	3.30435	29	0.879823	1.07241	NA
1	22019367	rs2501298	ALC:PACS/SPB/LM/R	8.34247	4.54493e-09	25.3246	0.000115855	2.06564	172	19	1	0.0546875	3.73256	3.15789	29	0.880961	1.16381	NA
1	22019367	rs2501298	ALC:PACS/SPB/LM/CD	7.5168	3.04228e-08	1.83774	0.000481803	0.39698	172	19	1	0.0546875	3.73256	3.15789	29	0.880961	1.16381	NA
1	23400090	rs72661441	ALC:PACS/SPB/LM/R	8.34247	4.54493e-09	25.3246	0.000115855	2.06564	178	13	1	0.0390625	3.66292	3.84615	29	0.875567	1.27212	NA
1	23400090	rs72661441	ALC:PACS/SPB/LM/CD	7.44965	3.55098e-08	3.2152	0.000617389	0.598787	178	13	1	0.0390625	3.66292	3.84615	29	0.875567	1.27212	NA
1	27631734	rs12726763	ALC:PACS/SPB/LM/R	8.34247	4.54493e-09	25.3246	0.000115855	2.06564	166	25	1	0.0703125	3.74096	3.24	29	0.887773	0.961434	NA
1	27631734	rs12726763	ALC:PACS/SPB/LM/CD	7.51427	3.06006e-08	1.43645	0.000498153	0.327192	166	25	1	0.0703125	3.74096	3.24	29	0.887773	0.961434	NA
1	34852255	rs57939493	ALC:PACS/SPB/LM/R	8.34247	4.54493e-09	25.3246	0.000115855	2.06564	155	36	1	0.0989583	3.46452	4.58333	29	0.908697	0.887836	NA
1	34852255	rs57939493	ALC:PACS/SPB/LM/CD	7.915	1.21619e-08	2.41148	0.000177503	0.527871	155	36	1	0.0989583	3.46452	4.58333	29	0.908697	0.887836	NA
1	68962483	rs77496154	ALC:PACS/SPB/LM/R	8.34247	4.54493e-09	25.3246	0.000115855	2.06564	176	15	1	0.0442708	3.67614	3.66667	29	0.897414	0.832883	NA
1	68962483	rs77496154	ALC:PACS/SPB/LM/CD	7.44446	3.59365e-08	2.75945	0.000617208	0.540346	176	15	1	0.0442708	3.67614	3.66667	29	0.897414	0.832883	NA
1	118983165	rs12742627	ALC:PACS/SPB/LM/R	8.34247	4.54493e-09	25.3246	0.000115855	2.06564	178	13	1	0.0390625	3.5618	5.23077	29	0.855541	1.75741	NA
1	118983165	rs12742627	ALC:PACS/SPB/LM/CD	7.87848	1.32288e-08	4.35242	0.000276427	0.742635	178	13	1	0.0390625	3.5618	5.23077	29	0.855541	1.75741	NA
1	156860426	rs10908523	ALC:PACS/SPB/LM/R	8.34247	4.54493e-09	25.3246	0.000115855	2.06564	178	13	1	0.0390625	3.71348	3.15385	29	0.897764	0.824242	NA
1	156860426	rs10908523	ALC:PACS/SPB/LM/CD	7.49302	3.2135e-08	2.64659	0.000541561	0.517499	178	13	1	0.0390625	3.71348	3.15385	29	0.897764	0.824242	NA
1	156866083	rs78655270	ALC:PACS/SPB/LM/R	8.34247	4.54493e-09	25.3246	0.000115855	2.06564	179	12	1	0.0364583	3.70391	3.25	29	0.897544	0.81657	NA
1	156866083	rs78655270	ALC:PACS/SPB/LM/CD	7.4741	3.35658e-08	2.91725	0.000571136	0.553532	179	12	1	0.0364583	3.70391	3.25	29	0.897544	0.81657	NA
1	156867046	rs2274497	ALC:PACS/SPB/LM/R	8.34247	4.54493e-09	25.3246	0.000115855	2.06564	176	15	1	0.0442708	3.71591	3.2	29	0.895124	0.872315	NA
1	156867046	rs2274497	ALC:PACS/SPB/LM/CD	7.49154	3.22447e-08	2.35933	0.000540267	0.478372	176	15	1	0.0442708	3.71591	3.2	29	0.895124	0.872315	NA
1	163443750	rs111888546	ALC:PACS/SPB/LM/R	8.34247	4.54493e-09	25.3246	0.000115855	2.06564	181	10	1	0.03125	3.79006	1.6	29	0.912094	0.650791	NA
1	163443750	rs111888546	ALC:PACS/SPB/LM/CD	8.03011	9.33012e-09	2.13679	9.4066e-05	0.430849	181	10	1	0.03125	3.79006	1.6	29	0.912094	0.650791	NA
1	170314610	rs1332965	ALC:PACS/SPB/LM/R	8.34247	4.54493e-09	25.3246	0.000115855	2.06564	179	12	1	0.0364583	3.74302	2.66667	29	0.894296	1.01009	NA
1	170314610	rs1332965	ALC:PACS/SPB/LM/CD	7.61148	2.44638e-08	2.44993	0.000366344	0.484878	179	12	1	0.0364583	3.74302	2.66667	29	0.894296	1.01009	NA
1	170415873	rs78593807	ALC:PACS/SPB/LM/R	8.34247	4.54493e-09	25.3246	0.000115855	2.06564	166	25	1	0.0703125	3.81928	2.72	29	0.896211	0.979584	NA
1	170415873	rs78593807	ALC:PACS/SPB/LM/CD	7.78174	1.65294e-08	0.920645	0.000219415	0.219768	166	25	1	0.0703125	3.81928	2.72	29	0.896211	0.979584	NA
1	187965949	rs587426	ALC:PACS/SPB/LM/R	8.34247	4.54493e-09	25.3246	0.000115855	2.06564	175	16	1	0.046875	3.65714	3.875	29	0.933001	0.649604	NA
1	187965949	rs587426	ALC:PACS/SPB/LM/CD	7.45335	3.52087e-08	2.81058	0.000584398	0.550964	175	16	1	0.046875	3.65714	3.875	29	0.933001	0.649604	NA
1	208975804	rs6685924	ALC:PACS/SPB/LM/R	8.34247	4.54493e-09	25.3246	0.000115855	2.06564	175	16	1	0.046875	3.68571	3.5625	29	0.875506	1.23936	NA
1	208975804	rs6685924	ALC:PACS/SPB/LM/CD	7.4473	3.5703e-08	2.53754	0.000606177	0.509011	175	16	1	0.046875	3.68571	3.5625	29	0.875506	1.23936	NA
1	213604663	rs10158077	ALC:PACS/SPB/LM/R	8.34247	4.54493e-09	25.3246	0.000115855	2.06564	167	24	1	0.0677083	3.75449	3.125	29	0.884212	1.04261	NA
1	213604663	rs10158077	ALC:PACS/SPB/LM/CD	7.55097	2.8121e-08	1.38936	0.000439016	0.317013	167	24	1	0.0677083	3.75449	3.125	29	0.884212	1.04261	NA
2	1805311	rs113992913	ALC:PACS/SPB/LM/R	8.34247	4.54493e-09	25.3246	0.000115855	2.06564	166	25	1	0.0703125	3.74096	3.24	29	0.88838	0.954456	NA
2	1805311	rs113992913	ALC:PACS/SPB/LM/CD	7.51427	3.06006e-08	1.43645	0.000498877	0.327192	166	25	1	0.0703125	3.74096	3.24	29	0.88838	0.954456	NA
2	6356768	rs116686631	ALC:PACS/SPB/LM/R	8.34247	4.54493e-09	25.3246	0.000115855	2.06564	180	11	1	0.0338542	3.59444	5	29	0.870011	1.3762	NA
2	6356768	rs116686631	ALC:PACS/SPB/LM/CD	7.7073	1.96199e-08	4.4976	0.000369693	0.746321	180	11	1	0.0338542	3.59444	5	29	0.870011	1.3762	NA
2	71701611	rs115634199	ALC:PACS/SPB/LM/R	7.8102	1.54812e-08	17.3737	4.29951e-05	1.75631	164	26	2	0.078125	3.62195	3.65385	21	0.874116	1.01829	1.85616
2	71701611	rs115634199	ALC:PACS/SPB/LM/CD	6.92864	1.17857e-07	2.21002	0.000243264	0.465108	164	26	2	0.078125	3.62195	3.65385	21	0.874116	1.01829	1.85616
2	75163195	rs7608119	ALC:PACS/SPB/LM/R	8.34247	4.54493e-09	25.3246	0.000115855	2.06564	185	6	1	0.0208333	3.66486	4	29	0.888119	1.03975	NA
2	75163195	rs7608119	ALC:PACS/SPB/LM/CD	7.4528	3.52533e-08	5.3319	0.000609007	0.784981	185	6	1	0.0208333	3.66486	4	29	0.888119	1.03975	NA
2	135436026	rs116839639	ALC:PACS/SPB/LM/R	8.34247	4.54493e-09	25.3246	0.000115855	2.06564	178	13	1	0.0390625	3.71348	3.15385	29	0.891313	0.952031	NA
2	135436026	rs116839639	ALC:PACS/SPB/LM/CD	7.49302	3.2135e-08	2.64659	0.000531797	0.517499	178	13	1	0.0390625	3.71348	3.15385	29	0.891313	0.952031	NA
2	169291393	rs59457398	ALC:PACS/SPB/LM/R	8.34247	4.54493e-09	25.3246	0.000115855	2.06564	155	36	1	0.0989583	3.60645	3.97222	29	0.845035	1.17651	NA
2	169291393	rs59457398	ALC:PACS/SPB/LM/CD	7.49448	3.2027e-08	1.73412	0.000577457	0.396606	155	36	1	0.0989583	3.60645	3.97222	29	0.845035	1.17651	NA
2	190325454	rs291471	ALC:PACS/SPB/LM/R	8.34247	4.54493e-09	25.3246	0.000115855	2.06564	176	15	1	0.0442708	3.64773	4	29	0.904825	0.786629	NA
2	190325454	rs291471	ALC:PACS/SPB/LM/CD	7.4664	3.41666e-08	3.04525	0.000574666	0.582321	176	15	1	0.0442708	3.64773	4	29	0.904825	0.786629	NA
2	217811598	rs9808439	ALC:PACS/SPB/LM/R	8.34247	4.54493e-09	25.3246	0.000115855	2.06564	180	11	1	0.0338542	3.67222	3.72727	29	0.883608	1.09351	NA
2	217811598	rs9808439	ALC:PACS/SPB/LM/CD	7.44485	3.59046e-08	3.50609	0.00061805	0.628308	180	11	1	0.0338542	3.67222	3.72727	29	0.883608	1.09351	NA
2	217812247	rs2288162	ALC:PACS/SPB/LM/R	8.34247	4.54493e-09	25.3246	0.000115855	2.06564	180	11	1	0.0338542	3.67222	3.72727	29	0.883608	1.09351	NA
2	217812247	rs2288162	ALC:PACS/SPB/LM/CD	7.44485	3.59046e-08	3.50609	0.00061805	0.628308	180	11	1	0.0338542	3.67222	3.72727	29	0.883608	1.09351	NA
2	217812556	rs2288163	ALC:PACS/SPB/LM/R	8.34247	4.54493e-09	25.3246	0.000115855	2.06564	181	10	1	0.03125	3.67403	3.7	29	0.886494	1.03017	NA
2	217812556	rs2288163	ALC:PACS/SPB/LM/CD	7.44453	3.59311e-08	3.7217	0.000617565	0.64983	181	10	1	0.03125	3.67403	3.7	29	0.886494	1.03017	NA
2	217813859	rs7559273	ALC:PACS/SPB/LM/R	8.34247	4.54493e-09	25.3246	0.000115855	2.06564	180	11	1	0.0338542	3.67222	3.72727	29	0.883608	1.09351	NA
2	217813859	rs7559273	ALC:PACS/SPB/LM/CD	7.44485	3.59046e-08	3.50609	0.00061805	0.628308	180	11	1	0.0338542	3.67222	3.72727	29	0.883608	1.09351	NA
2	217823029	rs10490756	ALC:PACS/SPB/LM/R	8.34247	4.54493e-09	25.3246	0.000115855	2.06564	179	12	1	0.0364583	3.65922	3.91667	29	0.878791	1.18133	NA
2	217823029	rs10490756	ALC:PACS/SPB/LM/CD	7.45399	3.51572e-08	3.45132	0.000611672	0.626035	179	12	1	0.0364583	3.65922	3.91667	29	0.878791	1.18133	NA
2	217824465	rs16858286	ALC:PACS/SPB/LM/R	8.34247	4.54493e-09	25.3246	0.000115855	2.06564	179	12	1	0.0364583	3.65922	3.91667	29	0.878791	1.18133	NA
2	217824465	rs16858286	ALC:PACS/SPB/LM/CD	7.45399	3.51572e-08	3.45132	0.000611672	0.626035	179	12	1	0.0364583	3.65922	3.91667	29	0.878791	1.18133	NA
2	225390069	rs1517494	ALC:PACS/SPB/LM/R	8.34247	4.54493e-09	25.3246	0.000115855	2.06564	178	13	1	0.0390625	3.63483	4.23077	29	0.900281	0.82146	NA
2	225390069	rs1517494	ALC:PACS/SPB/LM/CD	7.49953	3.16569e-08	3.5311	0.000529119	0.641034	178	13	1	0.0390625	3.63483	4.23077	29	0.900281	0.82146	NA
2	225454836	rs7597786	ALC:PACS/SPB/LM/R	8.34247	4.54493e-09	25.3246	0.000115855	2.06564	180	11	1	0.0338542	3.70556	3.18182	29	0.887941	1.07481	NA
2	225454836	rs7597786	ALC:PACS/SPB/LM/CD	7.48084	3.30488e-08	3.08115	0.000546396	0.572369	180	11	1	0.0338542	3.70556	3.18182	29	0.887941	1.07481	NA
3	10577764	rs11708444	ALC:PACS/SPB/LM/R	8.34247	4.54493e-09	25.3246	0.000115855	2.06564	159	32	1	0.0885417	3.63522	3.875	29	0.901551	0.854501	NA
3	10577764	rs11708444	ALC:PACS/SPB/LM/CD	7.46405	3.4352e-08	1.75295	0.000582178	0.39626	159	32	1	0.0885417	3.63522	3.875	29	0.901551	0.854501	NA
3	12057347	rs1680247	ALC:PACS/SPB/LM/R	8.34247	4.54493e-09	25.3246	0.000115855	2.06564	179	12	1	0.0364583	3.69274	3.41667	29	0.888586	0.9829	NA
3	12057347	rs1680247	ALC:PACS/SPB/LM/CD	7.45542	3.50417e-08	3.05076	0.000594194	0.572216	179	12	1	0.0364583	3.69274	3.41667	29	0.888586	0.9829	NA
3	12103482	rs972961	ALC:PACS/SPB/LM/R	8.34247	4.54493e-09	25.3246	0.000115855	2.06564	179	12	1	0.0364583	3.69274	3.41667	29	0.888586	0.9829	NA
3	12103482	rs972961	ALC:PACS/SPB/LM/CD	7.45542	3.50417e-08	3.05076	0.000594194	0.572216	179	12	1	0.0364583	3.69274	3.41667	29	0.888586	0.9829	NA
3	12319047	rs111698017	ALC:PACS/SPB/LM/R	8.34247	4.54493e-09	25.3246	0.000115855	2.06564	184	7	1	0.0234375	3.71739	2.57143	29	0.892424	1.29344	NA
3	12319047	rs111698017	ALC:PACS/SPB/LM/CD	7.5579	2.76756e-08	3.94535	0.000424487	0.656071	184	7	1	0.0234375	3.71739	2.57143	29	0.892424	1.29344	NA
3	54246110	rs4432683	ALC:PACS/SPB/LM/R	8.34247	4.54493e-09	25.3246	0.000115855	2.06564	139	52	1	0.140625	3.52518	4.07692	29	0.876414	0.937882	NA
3	54246110	rs4432683	ALC:PACS/SPB/LM/CD	7.5921	2.558e-08	1.5781	0.000430849	0.378187	139	52	1	0.140625	3.52518	4.07692	29	0.876414	0.937882	NA
3	66579319	rs956541	ALC:PACS/SPB/LM/R	8.34247	4.54493e-09	25.3246	0.000115855	2.06564	167	24	1	0.0677083	3.86826	2.33333	29	0.942358	0.58869	NA
3	66579319	rs956541	ALC:PACS/SPB/LM/CD	8.08189	8.28157e-09	0.613191	0.000125591	0.150669	167	24	1	0.0677083	3.86826	2.33333	29	0.942358	0.58869	NA
4	4577464	rs79992518	ALC:PACS/SPB/LM/R	8.34247	4.54493e-09	25.3246	0.000115855	2.06564	165	26	1	0.0729167	3.85455	2.53846	29	0.904777	0.914889	NA
4	4577464	rs79992518	ALC:PACS/SPB/LM/CD	7.94522	1.13445e-08	0.671222	0.00013525	0.16436	165	26	1	0.0729167	3.85455	2.53846	29	0.904777	0.914889	NA
4	14524457	rs78450095	ALC:PACS/SPB/LM/R	8.34247	4.54493e-09	25.3246	0.000115855	2.06564	178	13	1	0.0390625	3.58989	4.84615	29	0.896987	0.892637	NA
4	14524457	rs78450095	ALC:PACS/SPB/LM/CD	7.6898	2.04268e-08	4.03653	0.000336123	0.70486	178	13	1	0.0390625	3.58989	4.84615	29	0.896987	0.892637	NA
4	14574749	rs79690497	ALC:PACS/SPB/LM/R	8.34247	4.54493e-09	25.3246	0.000115855	2.06564	178	13	1	0.0390625	3.58989	4.84615	29	0.896987	0.892637	NA
4	14574749	rs79690497	ALC:PACS/SPB/LM/CD	7.6898	2.04268e-08	4.03653	0.000336123	0.70486	178	13	1	0.0390625	3.58989	4.84615	29	0.896987	0.892637	NA
4	18250266	rs16896779	ALC:PACS/SPB/LM/R	8.34247	4.54493e-09	25.3246	0.000115855	2.06564	182	9	1	0.0286458	3.70879	3	29	0.890223	1.07763	NA
4	18250266	rs16896779	ALC:PACS/SPB/LM/CD	7.49961	3.16515e-08	3.48589	0.000515985	0.615251	182	9	1	0.0286458	3.70879	3	29	0.890223	1.07763	NA
4	52538131	rs11737088	ALC:PACS/SPB/LM/R	8.34247	4.54493e-09	25.3246	0.000115855	2.06564	177	14	1	0.0416667	3.62712	4.28571	29	0.87426	1.17531	NA
4	52538131	rs11737088	ALC:PACS/SPB/LM/CD	7.51651	3.04434e-08	3.425	0.000539602	0.631334	177	14	1	0.0416667	3.62712	4.28571	29	0.87426	1.17531	NA
4	139648349	rs10008902	ALC:PACS/SPB/LM/R	8.34247	4.54493e-09	25.3246	0.000115855	2.06564	144	47	1	0.127604	3.72917	3.51064	29	0.972564	0.716689	NA
4	139648349	rs10008902	ALC:PACS/SPB/LM/CD	7.4661	3.41898e-08	0.946692	0.000614439	0.232909	144	47	1	0.127604	3.72917	3.51064	29	0.972564	0.716689	NA
4	143984812	rs116411797	ALC:PACS/SPB/LM/R	8.34247	4.54493e-09	25.3246	0.000115855	2.06564	178	13	1	0.0390625	3.82022	1.69231	29	0.916656	0.660529	NA
4	143984812	rs116411797	ALC:PACS/SPB/LM/CD	8.15236	7.04112e-09	1.4462	6.61282e-05	0.317892	178	13	1	0.0390625	3.82022	1.69231	29	0.916656	0.660529	NA
4	153087810	rs12651091	ALC:PACS/SPB/LM/R	8.34247	4.54493e-09	25.3246	0.000115855	2.06564	148	43	1	0.117188	3.73649	3.46512	29	0.932394	0.772666	NA
4	153087810	rs12651091	ALC:PACS/SPB/LM/CD	7.47585	3.34309e-08	0.978568	0.000587293	0.2389	148	43	1	0.117188	3.73649	3.46512	29	0.932394	0.772666	NA
4	154244201	rs7685188	ALC:PACS/SPB/LM/R	8.34247	4.54493e-09	25.3246	0.000115855	2.06564	180	11	1	0.0338542	3.62222	4.54545	29	0.871767	1.3785	NA
4	154244201	rs7685188	ALC:PACS/SPB/LM/CD	7.55765	2.76918e-08	4.14349	0.000502394	0.705987	180	11	1	0.0338542	3.62222	4.54545	29	0.871767	1.3785	NA
4	157210427	rs10025251	ALC:PACS/SPB/LM/R	8.34247	4.54493e-09	25.3246	0.000115855	2.06564	140	51	1	0.138021	3.8	3.33333	29	0.893813	0.899042	NA
4	157210427	rs10025251	ALC:PACS/SPB/LM/CD	7.54873	2.82661e-08	0.649336	0.000460542	0.163472	140	51	1	0.138021	3.8	3.33333	29	0.893813	0.899042	NA
4	157278380	rs7682101	ALC:PACS/SPB/LM/R	8.34247	4.54493e-09	25.3246	0.000115855	2.06564	149	42	1	0.114583	3.69128	3.61905	29	0.877351	0.955725	NA
4	157278380	rs7682101	ALC:PACS/SPB/LM/CD	7.44663	3.57573e-08	1.18271	0.000610831	0.284352	149	42	1	0.114583	3.69128	3.61905	29	0.877351	0.955725	NA
4	179834906	rs116208217	ALC:PACS/SPB/LM/R	8.34247	4.54493e-09	25.3246	0.000115855	2.06564	180	11	1	0.0338542	3.79444	1.72727	29	0.909825	0.771059	NA
4	179834906	rs116208217	ALC:PACS/SPB/LM/CD	8.01514	9.65745e-09	1.94799	9.6655e-05	0.402684	180	11	1	0.0338542	3.79444	1.72727	29	0.909825	0.771059	NA
4	188707364	rs56032647	ALC:PACS/SPB/LM/CD	8.48941	3.24035e-09	0.169614	2.27719e-05	0.0437276	165	26	1	0.0729167	3.93333	2.03846	29	0.922379	0.846537	NA
4	188707364	rs56032647	ALC:PACS/SPB/LM/R	8.34247	4.54493e-09	25.3246	0.000115855	2.06564	165	26	1	0.0729167	3.93333	2.03846	29	0.922379	0.846537	NA
5	26327066	rs78203450	ALC:PACS/SPB/LM/R	8.34247	4.54493e-09	25.3246	0.000115855	2.06564	186	5	1	0.0182292	3.66667	4	29	0.883095	1.88562	NA
5	26327066	rs78203450	ALC:PACS/SPB/LM/CD	7.45137	3.53696e-08	5.87195	0.000615564	0.818155	186	5	1	0.0182292	3.66667	4	29	0.883095	1.88562	NA
5	26327066	rs78203450	ALC:PACS/SPB:M/GLM/A	5.41144	3.39316e-09	12.6799	3.87756e-06	1.51549	163	2	1	0.0120482	3.57055	3.5	29	0.908562	0.989949	NA
5	102693515	rs76138999	ALC:PACS/SPB/LM/R	8.34247	4.54493e-09	25.3246	0.000115855	2.06564	180	11	1	0.0338542	3.69444	3.36364	29	0.881778	1.32396	NA
5	102693515	rs76138999	ALC:PACS/SPB/LM/CD	7.45896	3.47565e-08	3.2228	0.000580819	0.591419	180	11	1	0.0338542	3.69444	3.36364	29	0.881778	1.32396	NA
5	114391352	rs13187753	ALC:PACS/SPB/LM/R	8.34247	4.54493e-09	25.3246	0.000115855	2.06564	152	39	1	0.106771	3.56579	4.10256	29	0.854517	1.05966	NA
5	114391352	rs13187753	ALC:PACS/SPB/LM/CD	7.55902	2.76048e-08	1.8076	0.000492122	0.414586	152	39	1	0.106771	3.56579	4.10256	29	0.854517	1.05966	NA
5	155621947	rs7728980	ALC:PACS/SPB/LM/R	8.34247	4.54493e-09	25.3246	0.000115855	2.06564	160	31	1	0.0859375	3.55625	4.29032	29	0.932302	0.791979	NA
5	155621947	rs7728980	ALC:PACS/SPB/LM/CD	7.62387	2.37756e-08	2.22856	0.000355965	0.485545	160	31	1	0.0859375	3.55625	4.29032	29	0.932302	0.791979	NA
5	155631045	rs3863202	ALC:PACS/SPB/LM/R	8.34247	4.54493e-09	25.3246	0.000115855	2.06564	162	29	1	0.0807292	3.53086	4.48276	29	0.928874	0.80922	NA
5	155631045	rs3863202	ALC:PACS/SPB/LM/CD	7.73058	1.85959e-08	2.49953	0.00026891	0.530752	162	29	1	0.0807292	3.53086	4.48276	29	0.928874	0.80922	NA
5	162287558	rs17558068	ALC:PACS/SPB/LM/R	8.34247	4.54493e-09	25.3246	0.000115855	2.06564	172	19	1	0.0546875	3.7093	3.36842	29	0.912849	0.730789	NA
5	162287558	rs17558068	ALC:PACS/SPB/LM/CD	7.46989	3.38928e-08	2.03094	0.00059083	0.431233	172	19	1	0.0546875	3.7093	3.36842	29	0.912849	0.730789	NA
6	14100519	rs115470478	ALC:PACS/SPB/LM/R	8.34247	4.54493e-09	25.3246	0.000115855	2.06564	168	23	1	0.0651042	3.50595	4.91304	29	0.88012	1.01267	NA
6	14100519	rs115470478	ALC:PACS/SPB/LM/CD	7.96012	1.09618e-08	3.19302	0.000186707	0.629791	168	23	1	0.0651042	3.50595	4.91304	29	0.88012	1.01267	NA
6	23966895	rs537835	ALC:PACS/SPB/LM/R	8.34247	4.54493e-09	25.3246	0.000115855	2.06564	176	15	1	0.0442708	3.64205	4.06667	29	0.883705	0.996981	NA
6	23966895	rs537835	ALC:PACS/SPB/LM/CD	7.47634	3.3393e-08	3.10241	0.000577876	0.590504	176	15	1	0.0442708	3.64205	4.06667	29	0.883705	0.996981	NA
6	23990566	rs72842370	ALC:PACS/SPB/LM/R	8.34247	4.54493e-09	25.3246	0.000115855	2.06564	170	21	1	0.0598958	3.75294	3.04762	29	0.888142	1.0132	NA
6	23990566	rs72842370	ALC:PACS/SPB/LM/CD	7.56358	2.7316e-08	1.54788	0.000425404	0.345448	170	21	1	0.0598958	3.75294	3.04762	29	0.888142	1.0132	NA
6	24010468	rs72842397	ALC:PACS/SPB/LM/R	8.34247	4.54493e-09	25.3246	0.000115855	2.06564	171	20	1	0.0572917	3.73099	3.2	29	0.88351	1.06604	NA
6	24010468	rs72842397	ALC:PACS/SPB/LM/CD	7.50909	3.09678e-08	1.78031	0.000498495	0.387866	171	20	1	0.0572917	3.73099	3.2	29	0.88351	1.06604	NA
6	30068751	rs17187707	ALC:PACS/SPB/LM/R	8.34247	4.54493e-09	25.3246	0.000115855	2.06564	175	16	1	0.046875	3.72571	3.125	29	0.883416	1.16597	NA
6	30068751	rs17187707	ALC:PACS/SPB/LM/CD	7.51218	3.0748e-08	2.15529	0.000490227	0.447158	175	16	1	0.046875	3.72571	3.125	29	0.883416	1.16597	NA
6	32755531	rs114920411	ALC:PACS/SPB/LM/R	8.34247	4.54493e-09	25.3246	0.000115855	2.06564	165	26	1	0.0729167	3.78788	2.96154	29	0.957691	0.59138	NA
6	32755531	rs114920411	ALC:PACS/SPB/LM/CD	7.64114	2.28488e-08	1.09566	0.000441061	0.257787	165	26	1	0.0729167	3.78788	2.96154	29	0.957691	0.59138	NA
6	32818291	rs17429444	ALC:PACS/SPB/LM/R	8.34247	4.54493e-09	25.3246	0.000115855	2.06564	142	49	1	0.132812	3.79577	3.32653	29	0.977738	0.702997	NA
6	32818291	rs17429444	ALC:PACS/SPB/LM/CD	7.5472	2.83661e-08	0.68	0.000529406	0.170534	142	49	1	0.132812	3.79577	3.32653	29	0.977738	0.702997	NA
6	47269548	rs36081806	ALC:PACS/SPB/LM/R	8.34247	4.54493e-09	25.3246	0.000115855	2.06564	173	18	1	0.0520833	3.6474	3.94444	29	0.880495	1.01856	NA
6	47269548	rs36081806	ALC:PACS/SPB/LM/CD	7.46286	3.44463e-08	2.65377	0.00059735	0.532289	173	18	1	0.0520833	3.6474	3.94444	29	0.880495	1.01856	NA
6	70843694	rs77190822	ALC:PACS/SPB/LM/R	8.34247	4.54493e-09	25.3246	0.000115855	2.06564	181	10	1	0.03125	3.70718	3.1	29	0.894824	0.867607	NA
6	70843694	rs77190822	ALC:PACS/SPB/LM/CD	7.48917	3.24213e-08	3.26887	0.00054261	0.592876	181	10	1	0.03125	3.70718	3.1	29	0.894824	0.867607	NA
6	104241541	rs61738624	ALC:PACS/SPB/LM/R	8.34247	4.54493e-09	25.3246	0.000115855	2.06564	176	15	1	0.0442708	3.73864	2.93333	29	0.891455	0.99805	NA
6	104241541	rs61738624	ALC:PACS/SPB/LM/CD	7.55929	2.75874e-08	2.13069	0.000432431	0.441102	176	15	1	0.0442708	3.73864	2.93333	29	0.891455	0.99805	NA
6	121354454	rs72963370	ALC:PACS/SPB/LM/R	8.34247	4.54493e-09	25.3246	0.000115855	2.06564	166	25	1	0.0703125	3.79518	2.88	29	0.932848	0.658813	NA
6	121354454	rs72963370	ALC:PACS/SPB/LM/CD	7.67793	2.09926e-08	1.07936	0.000367468	0.253851	166	25	1	0.0703125	3.79518	2.88	29	0.932848	0.658813	NA
6	128450439	rs17459584	ALC:PACS/SPB/LM/R	8.34247	4.54493e-09	25.3246	0.000115855	2.06564	171	20	1	0.0572917	3.78363	2.75	29	0.915924	0.706646	NA
6	128450439	rs17459584	ALC:PACS/SPB/LM/CD	7.68993	2.04208e-08	1.3613	0.000330315	0.308323	171	20	1	0.0572917	3.78363	2.75	29	0.915924	0.706646	NA
7	21759957	rs10485976	ALC:PACS/SPB/LM/R	8.34247	4.54493e-09	25.3246	0.000115855	2.06564	164	27	1	0.0755208	3.85366	2.59259	29	0.897299	1.03066	NA
7	21759957	rs10485976	ALC:PACS/SPB/LM/CD	7.91886	1.20542e-08	0.660732	0.0001393	0.162148	164	27	1	0.0755208	3.85366	2.59259	29	0.897299	1.03066	NA
7	86537076	rs781011	ALC:PACS/SPB/LM/R	8.34247	4.54493e-09	25.3246	0.000115855	2.06564	149	42	1	0.114583	3.60403	3.92857	29	0.869002	0.980064	NA
7	86537076	rs781011	ALC:PACS/SPB/LM/CD	7.48862	3.24621e-08	1.54466	0.000564309	0.3628	149	42	1	0.114583	3.60403	3.92857	29	0.869002	0.980064	NA
7	98802976	rs12668051	ALC:PACS/SPB/LM/R	8.34247	4.54493e-09	25.3246	0.000115855	2.06564	168	23	1	0.0651042	3.77976	2.91304	29	0.884906	1.13146	NA
7	98802976	rs12668051	ALC:PACS/SPB/LM/CD	7.63934	2.29436e-08	1.25576	0.000328515	0.289356	168	23	1	0.0651042	3.77976	2.91304	29	0.884906	1.13146	NA
7	108717038	rs117189135	ALC:PACS/SPB/LM/R	8.34247	4.54493e-09	25.3246	0.000115855	2.06564	186	5	1	0.0182292	3.6828	3.4	29	0.902543	0.602928	NA
7	108717038	rs117189135	ALC:PACS/SPB/LM/CD	7.44943	3.55279e-08	5.52889	0.000615047	0.78947	186	5	1	0.0182292	3.6828	3.4	29	0.902543	0.602928	NA
7	132726332	rs17166731	ALC:PACS/SPB/LM/R	8.34247	4.54493e-09	25.3246	0.000115855	2.06564	172	19	1	0.0546875	3.58721	4.47368	29	0.913016	0.805857	NA
7	132726332	rs17166731	ALC:PACS/SPB/LM/CD	7.61683	2.41641e-08	3.04528	0.000378139	0.595178	172	19	1	0.0546875	3.58721	4.47368	29	0.913016	0.805857	NA
7	146774081	rs77197724	ALC:PACS/SPB/LM/R	8.34247	4.54493e-09	25.3246	0.000115855	2.06564	185	6	1	0.0208333	3.71892	2.33333	29	0.898048	0.811543	NA
7	146774081	rs77197724	ALC:PACS/SPB/LM/CD	7.58744	2.58559e-08	4.29741	0.00039913	0.685321	185	6	1	0.0208333	3.71892	2.33333	29	0.898048	0.811543	NA
7	146830884	rs185863172	ALC:PACS/SPB/LM/R	8.34247	4.54493e-09	25.3246	0.000115855	2.06564	188	3	1	0.0130208	3.69681	2.33333	29	0.89792	0.57735	NA
7	146830884	rs185863172	ALC:PACS/SPB/LM/CD	7.51474	3.05674e-08	6.69067	0.000506361	0.844883	188	3	1	0.0130208	3.69681	2.33333	29	0.89792	0.57735	NA
7	146830884	rs185863172	ALC:PACS/SPB/LM/A	5.52984	2.9523e-06	9.31398	0.000126189	1.2604	188	3	1	0.0130208	3.69681	2.33333	29	0.89792	0.57735	NA
7	146840145	rs75366057	ALC:PACS/SPB/LM/R	8.34247	4.54493e-09	25.3246	0.000115855	2.06564	186	5	1	0.0182292	3.72043	2	29	0.90084	0.648886	NA
7	146840145	rs75366057	ALC:PACS/SPB/LM/CD	7.62925	2.3483e-08	4.72841	0.000352967	0.717514	186	5	1	0.0182292	3.72043	2	29	0.90084	0.648886	NA
8	4949635	rs6558946	ALC:PACS/SPB/LM/R	8.34247	4.54493e-09	25.3246	0.000115855	2.06564	177	14	1	0.0416667	3.67232	3.71429	29	0.881148	1.09035	NA
8	4949635	rs6558946	ALC:PACS/SPB/LM/CD	7.44474	3.59137e-08	2.945	0.000618116	0.564494	177	14	1	0.0416667	3.67232	3.71429	29	0.881148	1.09035	NA
8	5001022	rs78530558	ALC:PACS/SPB/LM/R	8.34247	4.54493e-09	25.3246	0.000115855	2.06564	188	3	1	0.0130208	3.64362	5.66667	29	0.883968	1.85485	NA
8	5001022	rs78530558	ALC:PACS/SPB/LM/A	8.00257	9.94092e-09	11.3404	6.02781e-06	1.41069	188	3	1	0.0130208	3.64362	5.66667	29	0.883968	1.85485	NA
8	5001022	rs78530558	ALC:PACS/SPB/LM/CD	7.59936	2.51561e-08	8.14632	0.000464547	0.938803	188	3	1	0.0130208	3.64362	5.66667	29	0.883968	1.85485	NA
8	5001022	rs78530558	ALC:PACS/SPB:M/GLM/A	5.67223	2.50181e-09	11.4495	2.127e-06	1.44097	162	3	1	0.0150602	3.53086	5.66667	29	0.899214	1.85485	NA
8	5014389	rs78118941	ALC:PACS/SPB/LM/R	8.34247	4.54493e-09	25.3246	0.000115855	2.06564	188	3	1	0.0130208	3.64362	5.66667	29	0.883968	1.85485	NA
8	5014389	rs78118941	ALC:PACS/SPB/LM/A	8.00257	9.94092e-09	11.3404	6.02781e-06	1.41069	188	3	1	0.0130208	3.64362	5.66667	29	0.883968	1.85485	NA
8	5014389	rs78118941	ALC:PACS/SPB/LM/CD	7.59936	2.51561e-08	8.14632	0.000464547	0.938803	188	3	1	0.0130208	3.64362	5.66667	29	0.883968	1.85485	NA
8	5014389	rs78118941	ALC:PACS/SPB:M/GLM/A	5.67223	2.50181e-09	11.4495	2.127e-06	1.44097	162	3	1	0.0150602	3.53086	5.66667	29	0.899214	1.85485	NA
8	19334355	rs78343248	ALC:PACS/SPB/LM/R	8.34247	4.54493e-09	25.3246	0.000115855	2.06564	155	36	1	0.0989583	3.6	4	29	0.875943	0.964486	NA
8	19334355	rs78343248	ALC:PACS/SPB/LM/CD	7.50429	3.13116e-08	1.76491	0.000540571	0.402803	155	36	1	0.0989583	3.6	4	29	0.875943	0.964486	NA
8	28304238	rs57137307	ALC:PACS/SPB/LM/R	8.34247	4.54493e-09	25.3246	0.000115855	2.06564	156	35	1	0.0963542	3.83974	2.94286	29	0.886637	1.02938	NA
8	28304238	rs57137307	ALC:PACS/SPB/LM/CD	7.7397	1.82095e-08	0.631639	0.000246146	0.156764	156	35	1	0.0963542	3.83974	2.94286	29	0.886637	1.02938	NA
8	42517028	rs13281070	ALC:PACS/SPB/LM/R	8.34247	4.54493e-09	25.3246	0.000115855	2.06564	154	37	1	0.101562	3.73377	3.43243	29	0.873409	1.01824	NA
8	42517028	rs13281070	ALC:PACS/SPB/LM/CD	7.47912	3.31803e-08	1.10392	0.000546235	0.264627	154	37	1	0.101562	3.73377	3.43243	29	0.873409	1.01824	NA
8	42595298	rs7813319	ALC:PACS/SPB/LM/R	8.34247	4.54493e-09	25.3246	0.000115855	2.06564	161	30	1	0.0833333	3.79503	3.03333	29	0.892603	0.941586	NA
8	42595298	rs7813319	ALC:PACS/SPB/LM/CD	7.63258	2.33032e-08	0.947674	0.000352805	0.227469	161	30	1	0.0833333	3.79503	3.03333	29	0.892603	0.941586	NA
8	72240765	rs72663465	ALC:PACS/SPB/LM/R	8.34247	4.54493e-09	25.3246	0.000115855	2.06564	183	8	1	0.0260417	3.62842	4.75	29	0.877086	1.37531	NA
8	72240765	rs72663465	ALC:PACS/SPB/LM/CD	7.56799	2.704e-08	5.04628	0.000488976	0.779401	183	8	1	0.0260417	3.62842	4.75	29	0.877086	1.37531	NA
8	130576959	rs4388470	ALC:PACS/SPB/LM/R	8.34247	4.54493e-09	25.3246	0.000115855	2.06564	175	16	1	0.046875	3.67429	3.6875	29	0.880721	1.06616	NA
8	130576959	rs4388470	ALC:PACS/SPB/LM/CD	7.44448	3.59351e-08	2.64676	0.000617579	0.526003	175	16	1	0.046875	3.67429	3.6875	29	0.880721	1.06616	NA
9	1342328	rs10961025	ALC:PACS/SPB/LM/R	8.34247	4.54493e-09	25.3246	0.000115855	2.06564	177	14	1	0.0416667	3.81921	1.85714	29	0.910278	0.866519	NA
9	1342328	rs10961025	ALC:PACS/SPB/LM/CD	8.08846	8.15709e-09	1.385	7.59361e-05	0.307506	177	14	1	0.0416667	3.81921	1.85714	29	0.910278	0.866519	NA
9	8956534	rs4526401	ALC:PACS/SPB/LM/R	8.30298	4.97765e-09	25.3263	0.000120916	2.0661	169	21	1	0.0602094	3.65089	3.85714	29	0.885408	0.921282	NA
9	8956534	rs4526401	ALC:PACS/SPB/LM/CD	7.41613	3.83597e-08	2.31465	0.00062849	0.483769	169	21	1	0.0602094	3.65089	3.85714	29	0.885408	0.921282	NA
9	26637875	rs10967450	ALC:PACS/SPB/LM/R	8.34247	4.54493e-09	25.3246	0.000115855	2.06564	175	16	1	0.046875	3.64571	4	29	0.909465	0.765092	NA
9	26637875	rs10967450	ALC:PACS/SPB/LM/CD	7.468	3.40411e-08	2.9198	0.000568833	0.567267	175	16	1	0.046875	3.64571	4	29	0.909465	0.765092	NA
9	26668100	rs10967471	ALC:PACS/SPB/LM/R	8.34247	4.54493e-09	25.3246	0.000115855	2.06564	155	36	1	0.0989583	3.78065	3.22222	29	0.885922	0.960106	NA
9	26668100	rs10967471	ALC:PACS/SPB/LM/CD	7.56117	2.74683e-08	0.902822	0.000433133	0.21944	155	36	1	0.0989583	3.78065	3.22222	29	0.885922	0.960106	NA
9	38743730	rs9407079	ALC:PACS/SPB/LM/R	8.30298	4.97765e-09	25.3263	0.000120916	2.0661	136	54	1	0.146597	3.75735	3.46296	29	0.87753	0.933459	NA
9	38743730	rs9407079	ALC:PACS/SPB/LM/CD	7.44867	3.55905e-08	0.765928	0.000562993	0.192218	136	54	1	0.146597	3.75735	3.46296	29	0.87753	0.933459	NA
9	86999361	rs7863740	ALC:PACS/SPB/LM/R	8.30949	4.90357e-09	25.3316	0.0001208	2.06753	154	36	1	0.0994764	3.46753	4.52778	29	0.850648	1.06638	NA
9	86999361	rs7863740	ALC:PACS/SPB/LM/CD	7.83213	1.47186e-08	2.36007	0.000254814	0.519253	154	36	1	0.0994764	3.46753	4.52778	29	0.850648	1.06638	NA
9	112014995	rs10981208	ALC:PACS/SPB/LM/R	8.34247	4.54493e-09	25.3246	0.000115855	2.06564	166	25	1	0.0703125	3.60241	4.16	29	0.87767	0.992824	NA
9	112014995	rs10981208	ALC:PACS/SPB/LM/CD	7.53097	2.94466e-08	2.34904	0.000509909	0.496887	166	25	1	0.0703125	3.60241	4.16	29	0.87767	0.992824	NA
9	117970488	rs12001503	ALC:PACS/SPB/LM/R	8.34247	4.54493e-09	25.3246	0.000115855	2.06564	174	17	1	0.0494792	3.8046	2.35294	29	0.90443	0.881948	NA
9	117970488	rs12001503	ALC:PACS/SPB/LM/CD	7.86412	1.36735e-08	1.34214	0.000170548	0.30209	174	17	1	0.0494792	3.8046	2.35294	29	0.90443	0.881948	NA
9	133255935	rs8176746	ALC:PACS/SPB/LM/R	8.34247	4.54493e-09	25.3246	0.000115855	2.06564	141	50	1	0.135417	3.60284	3.88	29	0.903992	0.867028	NA
9	133255935	rs8176746	ALC:PACS/SPB/LM/CD	7.48074	3.30567e-08	1.35334	0.000555386	0.326763	141	50	1	0.135417	3.60284	3.88	29	0.903992	0.867028	NA
9	133256028	rs8176743	ALC:PACS/SPB/LM/R	8.34247	4.54493e-09	25.3246	0.000115855	2.06564	141	50	1	0.135417	3.60284	3.88	29	0.903992	0.867028	NA
9	133256028	rs8176743	ALC:PACS/SPB/LM/CD	7.48074	3.30567e-08	1.35334	0.000555386	0.326763	141	50	1	0.135417	3.60284	3.88	29	0.903992	0.867028	NA
9	133256074	rs8176741	ALC:PACS/SPB/LM/R	8.34247	4.54493e-09	25.3246	0.000115855	2.06564	141	50	1	0.135417	3.60284	3.88	29	0.903992	0.867028	NA
9	133256074	rs8176741	ALC:PACS/SPB/LM/CD	7.48074	3.30567e-08	1.35334	0.000555386	0.326763	141	50	1	0.135417	3.60284	3.88	29	0.903992	0.867028	NA
9	133262254	rs8176693	ALC:PACS/SPB/LM/R	8.34247	4.54493e-09	25.3246	0.000115855	2.06564	141	50	1	0.135417	3.60284	3.88	29	0.903992	0.867028	NA
9	133262254	rs8176693	ALC:PACS/SPB/LM/CD	7.48074	3.30567e-08	1.35334	0.000555386	0.326763	141	50	1	0.135417	3.60284	3.88	29	0.903992	0.867028	NA
9	133623022	rs11998869	ALC:PACS/SPB/LM/R	8.34247	4.54493e-09	25.3246	0.000115855	2.06564	168	23	1	0.0651042	3.625	4.04348	29	0.881309	0.974253	NA
9	133623022	rs11998869	ALC:PACS/SPB/LM/CD	7.4898	3.23743e-08	2.35073	0.000559205	0.493462	168	23	1	0.0651042	3.625	4.04348	29	0.881309	0.974253	NA
10	16792661	rs3824633	ALC:PACS/SPB/LM/R	8.34247	4.54493e-09	25.3246	0.000115855	2.06564	156	35	1	0.0963542	3.59615	4.02857	29	0.851051	1.12632	NA
10	16792661	rs3824633	ALC:PACS/SPB/LM/CD	7.51289	3.06979e-08	1.82399	0.000551371	0.413526	156	35	1	0.0963542	3.59615	4.02857	29	0.851051	1.12632	NA
10	18146077	rs11012800	ALC:PACS/SPB/LM/R	8.34247	4.54493e-09	25.3246	0.000115855	2.06564	165	26	1	0.0729167	3.58182	4.26923	29	0.956418	0.712681	NA
10	18146077	rs11012800	ALC:PACS/SPB/LM/CD	7.58046	2.62748e-08	2.40756	0.000380341	0.508921	165	26	1	0.0729167	3.58182	4.26923	29	0.956418	0.712681	NA
10	18150395	rs114435241	ALC:PACS/SPB/LM/R	8.34247	4.54493e-09	25.3246	0.000115855	2.06564	165	26	1	0.0729167	3.58182	4.26923	29	0.956418	0.712681	NA
10	18150395	rs114435241	ALC:PACS/SPB/LM/CD	7.58046	2.62748e-08	2.40756	0.000380341	0.508921	165	26	1	0.0729167	3.58182	4.26923	29	0.956418	0.712681	NA
10	28255865	rs75147502	ALC:PACS/SPB/LM/R	8.34247	4.54493e-09	25.3246	0.000115855	2.06564	183	8	1	0.0260417	3.63388	4.625	29	0.881563	1.17815	NA
10	28255865	rs75147502	ALC:PACS/SPB/LM/CD	7.54089	2.87812e-08	4.95917	0.000509235	0.770826	183	8	1	0.0260417	3.63388	4.625	29	0.881563	1.17815	NA
10	57324602	rs117547400	ALC:PACS/SPB/LM/R	8.34247	4.54493e-09	25.3246	0.000115855	2.06564	178	13	1	0.0390625	3.83708	1.46154	29	0.917419	0.770024	NA
10	57324602	rs117547400	ALC:PACS/SPB/LM/CD	8.32859	4.69254e-09	1.25666	3.05643e-05	0.281989	178	13	1	0.0390625	3.83708	1.46154	29	0.917419	0.770024	NA
10	66538988	rs80138828	ALC:PACS/SPB/LM/R	8.30949	4.90357e-09	25.3316	0.0001208	2.06753	173	17	1	0.0497382	3.65318	3.82353	29	0.899479	0.796752	NA
10	66538988	rs80138828	ALC:PACS/SPB/LM/CD	7.41805	3.819e-08	2.65726	0.000628507	0.531086	173	17	1	0.0497382	3.65318	3.82353	29	0.899479	0.796752	NA
10	84194212	rs76041290	ALC:PACS/SPB/LM/R	8.34247	4.54493e-09	25.3246	0.000115855	2.06564	183	8	1	0.0260417	3.67213	3.75	29	0.887711	1.02606	NA
10	84194212	rs76041290	ALC:PACS/SPB/LM/CD	7.44504	3.58887e-08	4.34936	0.000617545	0.708016	183	8	1	0.0260417	3.67213	3.75	29	0.887711	1.02606	NA
10	85452673	rs72827570	ALC:PACS/SPB/LM/R	8.34247	4.54493e-09	25.3246	0.000115855	2.06564	178	13	1	0.0390625	3.6236	4.38462	29	0.923381	0.696851	NA
10	85452673	rs72827570	ALC:PACS/SPB/LM/CD	7.53431	2.92204e-08	3.65745	0.000455662	0.657407	178	13	1	0.0390625	3.6236	4.38462	29	0.923381	0.696851	NA
10	85462397	rs72827600	ALC:PACS/SPB/LM/R	8.34247	4.54493e-09	25.3246	0.000115855	2.06564	176	15	1	0.0442708	3.65341	3.93333	29	0.928419	0.6602	NA
10	85462397	rs72827600	ALC:PACS/SPB/LM/CD	7.45831	3.48091e-08	2.98809	0.000574351	0.574069	176	15	1	0.0442708	3.65341	3.93333	29	0.928419	0.6602	NA
10	85506315	rs4543926	ALC:PACS/SPB/LM/R	8.34247	4.54493e-09	25.3246	0.000115855	2.06564	175	16	1	0.046875	3.67429	3.6875	29	0.933367	0.631512	NA
10	85506315	rs4543926	ALC:PACS/SPB/LM/CD	7.44448	3.59351e-08	2.64676	0.000615726	0.526003	175	16	1	0.046875	3.67429	3.6875	29	0.933367	0.631512	NA
10	85756870	rs74611276	ALC:PACS/SPB/LM/CD	8.4933	3.21147e-09	3.6984	6.86015e-05	0.704909	168	23	1	0.0651042	3.43452	5.43478	29	0.852703	1.24734	NA
10	85756870	rs74611276	ALC:PACS/SPB/LM/R	8.34247	4.54493e-09	25.3246	0.000115855	2.06564	168	23	1	0.0651042	3.43452	5.43478	29	0.852703	1.24734	NA
10	87703444	rs113551777	ALC:PACS/SPB/LM/R	8.34247	4.54493e-09	25.3246	0.000115855	2.06564	185	6	1	0.0208333	3.65405	4.33333	29	0.889678	0.962567	NA
10	87703444	rs113551777	ALC:PACS/SPB/LM/CD	7.47877	3.32071e-08	5.53879	0.000572754	0.803363	185	6	1	0.0208333	3.65405	4.33333	29	0.889678	0.962567	NA
10	87888186	rs72814163	ALC:PACS/SPB/LM/R	8.34247	4.54493e-09	25.3246	0.000115855	2.06564	188	3	1	0.0130208	3.70213	2	29	0.897007	0.755929	NA
10	87888186	rs72814163	ALC:PACS/SPB/LM/CD	7.55405	2.79224e-08	6.54511	0.000435092	0.834674	188	3	1	0.0130208	3.70213	2	29	0.897007	0.755929	NA
10	87888186	rs72814163	ALC:PACS/SPB/LM/A	5.31089	4.88772e-06	9.11135	0.0001704	1.24418	188	3	1	0.0130208	3.70213	2	29	0.897007	0.755929	NA
10	123444805	rs11248530	ALC:PACS/SPB/LM/R	8.34247	4.54493e-09	25.3246	0.000115855	2.06564	168	23	1	0.0651042	3.79762	2.78261	29	0.900346	0.888227	NA
10	123444805	rs11248530	ALC:PACS/SPB/LM/CD	7.71197	1.94102e-08	1.12941	0.000281951	0.263344	168	23	1	0.0651042	3.79762	2.78261	29	0.900346	0.888227	NA
10	123473252	rs77399947	ALC:PACS/SPB/LM/R	8.34247	4.54493e-09	25.3246	0.000115855	2.06564	174	17	1	0.0494792	3.77011	2.70588	29	0.903125	0.816947	NA
10	123473252	rs77399947	ALC:PACS/SPB/LM/CD	7.66947	2.14057e-08	1.65595	0.000325328	0.361352	174	17	1	0.0494792	3.77011	2.70588	29	0.903125	0.816947	NA
10	123480171	rs10902934	ALC:PACS/SPB/LM/R	8.32039	4.78196e-09	25.3368	0.000120093	2.06897	173	17	1	0.0497382	3.75723	2.70588	29	0.898178	0.816947	NA
10	123480171	rs10902934	ALC:PACS/SPB/LM/CD	7.6416	2.28244e-08	1.66822	0.00034225	0.364588	173	17	1	0.0497382	3.75723	2.70588	29	0.898178	0.816947	NA
10	123482160	rs12257483	ALC:PACS/SPB/LM/R	8.34247	4.54493e-09	25.3246	0.000115855	2.06564	157	34	1	0.09375	3.85987	2.82353	29	0.912888	0.822446	NA
10	123482160	rs12257483	ALC:PACS/SPB/LM/CD	7.83027	1.47818e-08	0.542	0.000212431	0.135427	157	34	1	0.09375	3.85987	2.82353	29	0.912888	0.822446	NA
10	123793739	rs2162537	ALC:PACS/SPB/LM/R	8.34247	4.54493e-09	25.3246	0.000115855	2.06564	169	22	1	0.0625	3.70414	3.45455	29	0.890133	0.917889	NA
10	123793739	rs2162537	ALC:PACS/SPB/LM/CD	7.45997	3.46764e-08	1.85326	0.000588566	0.403789	169	22	1	0.0625	3.70414	3.45455	29	0.890133	0.917889	NA
10	133481262	rs112128025	ALC:PACS/SPB/LM/R	8.34247	4.54493e-09	25.3246	0.000115855	2.06564	162	29	1	0.0807292	3.58025	4.2069	29	0.884908	0.938382	NA
10	133481262	rs112128025	ALC:PACS/SPB/LM/CD	7.56821	2.70266e-08	2.21377	0.000457315	0.479648	162	29	1	0.0807292	3.58025	4.2069	29	0.884908	0.938382	NA
11	4805802	rs11033960	ALC:PACS/SPB/LM/R	8.34247	4.54493e-09	25.3246	0.000115855	2.06564	171	20	1	0.0572917	3.61404	4.2	29	0.856251	1.39108	NA
11	4805802	rs11033960	ALC:PACS/SPB/LM/CD	7.52318	2.99792e-08	2.71145	0.00054815	0.546421	171	20	1	0.0572917	3.61404	4.2	29	0.856251	1.39108	NA
11	34624089	rs17292176	ALC:PACS/SPB/LM/R	8.34247	4.54493e-09	25.3246	0.000115855	2.06564	186	5	1	0.0182292	3.70968	2.4	29	0.895564	0.956183	NA
11	34624089	rs17292176	ALC:PACS/SPB/LM/CD	7.55144	2.80907e-08	4.95712	0.000439985	0.738848	186	5	1	0.0182292	3.70968	2.4	29	0.895564	0.956183	NA
11	45953579	rs3736508	ALC:PACS/SPB/LM/R	8.34247	4.54493e-09	25.3246	0.000115855	2.06564	173	18	1	0.0520833	3.78613	2.61111	29	0.929938	0.588838	NA
11	45953579	rs3736508	ALC:PACS/SPB/LM/CD	7.73345	1.84736e-08	1.44874	0.000320644	0.323573	173	18	1	0.0520833	3.78613	2.61111	29	0.929938	0.588838	NA
11	63010009	rs72933464	ALC:PACS/SPB/LM/R	8.34247	4.54493e-09	25.3246	0.000115855	2.06564	167	24	1	0.0677083	3.64072	3.91667	29	0.863863	1.1698	NA
11	63010009	rs72933464	ALC:PACS/SPB/LM/CD	7.4649	3.4285e-08	2.16553	0.000603935	0.462952	167	24	1	0.0677083	3.64072	3.91667	29	0.863863	1.1698	NA
11	68513987	rs76225083	ALC:PACS/SPB/LM/R	8.34247	4.54493e-09	25.3246	0.000115855	2.06564	171	20	1	0.0572917	3.63158	4.05	29	0.880819	0.994743	NA
11	68513987	rs76225083	ALC:PACS/SPB/LM/CD	7.48457	3.27662e-08	2.57177	0.000567641	0.524031	171	20	1	0.0572917	3.63158	4.05	29	0.880819	0.994743	NA
11	70037485	rs61705100	ALC:PACS/SPB/LM/R	8.34247	4.54493e-09	25.3246	0.000115855	2.06564	181	10	1	0.03125	3.55801	5.8	29	0.937141	0.731635	NA
11	70037485	rs61705100	ALC:PACS/SPB/LM/CD	8.05843	8.74118e-09	5.3066	0.00011484	0.823352	181	10	1	0.03125	3.55801	5.8	29	0.937141	0.731635	NA
11	70037485	rs61705100	ALC:PACS/SPB/LM/A	5.49624	3.18977e-06	6.04839	3.3429e-05	0.982685	181	10	1	0.03125	3.55801	5.8	29	0.937141	0.731635	NA
11	70037485	rs61705100	ALC:PACS/SPB:M/GLM/A	5.36814	1.60109e-07	7.59408	4.28412e-06	1.15033	158	7	1	0.0271084	3.46203	6	29	0.974559	0.66394	NA
11	70045066	rs77059288	ALC:PACS/SPB/LM/R	8.34247	4.54493e-09	25.3246	0.000115855	2.06564	181	10	1	0.03125	3.55801	5.8	29	0.937141	0.731635	NA
11	70045066	rs77059288	ALC:PACS/SPB/LM/CD	8.05843	8.74118e-09	5.3066	0.00011484	0.823352	181	10	1	0.03125	3.55801	5.8	29	0.937141	0.731635	NA
11	70045066	rs77059288	ALC:PACS/SPB/LM/A	5.49624	3.18977e-06	6.04839	3.3429e-05	0.982685	181	10	1	0.03125	3.55801	5.8	29	0.937141	0.731635	NA
11	70045066	rs77059288	ALC:PACS/SPB:M/GLM/A	5.36814	1.60109e-07	7.59408	4.28412e-06	1.15033	158	7	1	0.0271084	3.46203	6	29	0.974559	0.66394	NA
11	96233788	rs72975996	ALC:PACS/SPB/LM/R	8.34247	4.54493e-09	25.3246	0.000115855	2.06564	154	37	1	0.101562	3.87013	2.86486	29	0.930031	0.747834	NA
11	96233788	rs72975996	ALC:PACS/SPB/LM/CD	7.83197	1.47241e-08	0.46906	0.000231441	0.118223	154	37	1	0.101562	3.87013	2.86486	29	0.930031	0.747834	NA
11	134575761	rs73040307	ALC:PACS/SPB/LM/R	8.34247	4.54493e-09	25.3246	0.000115855	2.06564	187	4	1	0.015625	3.74866	0.25	29	0.909589	0.5	NA
11	134575761	rs73040307	ALC:PACS/SPB/LM/CD	8.06237	8.66215e-09	4.628	4.03369e-05	0.695852	187	4	1	0.015625	3.74866	0.25	29	0.909589	0.5	NA
12	13047171	rs116984772	ALC:PACS/SPB/LM/R	8.34247	4.54493e-09	25.3246	0.000115855	2.06564	185	6	1	0.0208333	3.62162	5.33333	29	0.878441	1.49854	NA
12	13047171	rs116984772	ALC:PACS/SPB/LM/CD	7.66287	2.17333e-08	6.15948	0.000406328	0.855862	185	6	1	0.0208333	3.62162	5.33333	29	0.878441	1.49854	NA
12	13047171	rs116984772	ALC:PACS/SPB/LM/A	5.82098	1.51014e-06	7.60106	4.87565e-05	1.12593	185	6	1	0.0208333	3.62162	5.33333	29	0.878441	1.49854	NA
12	13167907	rs117124940	ALC:PACS/SPB/LM/R	8.34247	4.54493e-09	25.3246	0.000115855	2.06564	179	12	1	0.0364583	3.60894	4.66667	29	0.862476	1.74505	NA
12	13167907	rs117124940	ALC:PACS/SPB/LM/CD	7.60574	2.47893e-08	4.05216	0.000468339	0.701151	179	12	1	0.0364583	3.60894	4.66667	29	0.862476	1.74505	NA
12	80163569	rs73148399	ALC:PACS/SPB/LM/R	8.34247	4.54493e-09	25.3246	0.000115855	2.06564	166	25	1	0.0703125	3.5241	4.68	29	0.871276	1.04709	NA
12	80163569	rs73148399	ALC:PACS/SPB/LM/CD	7.81755	1.52212e-08	2.86485	0.000266922	0.583583	166	25	1	0.0703125	3.5241	4.68	29	0.871276	1.04709	NA
12	80172166	rs6539493	ALC:PACS/SPB/LM/R	8.34247	4.54493e-09	25.3246	0.000115855	2.06564	166	25	1	0.0703125	3.5241	4.68	29	0.871276	1.04709	NA
12	80172166	rs6539493	ALC:PACS/SPB/LM/CD	7.81755	1.52212e-08	2.86485	0.000266922	0.583583	166	25	1	0.0703125	3.5241	4.68	29	0.871276	1.04709	NA
12	80187467	rs1920405	ALC:PACS/SPB/LM/R	8.34247	4.54493e-09	25.3246	0.000115855	2.06564	166	25	1	0.0703125	3.56024	4.44	29	0.881275	0.97455	NA
12	80187467	rs1920405	ALC:PACS/SPB/LM/CD	7.66016	2.18694e-08	2.62678	0.000371654	0.544295	166	25	1	0.0703125	3.56024	4.44	29	0.881275	0.97455	NA
12	117244024	rs10850803	ALC:PACS/SPB/LM/R	8.34247	4.54493e-09	25.3246	0.000115855	2.06564	164	27	1	0.0755208	3.56707	4.33333	29	0.925709	0.794215	NA
12	117244024	rs10850803	ALC:PACS/SPB/LM/CD	7.61897	2.40453e-08	2.42634	0.000365136	0.514083	164	27	1	0.0755208	3.56707	4.33333	29	0.925709	0.794215	NA
12	124160012	rs77962327	ALC:PACS/SPB/LM/R	8.34247	4.54493e-09	25.3246	0.000115855	2.06564	174	17	1	0.0494792	3.63793	4.05882	29	0.87592	1.09225	NA
12	124160012	rs77962327	ALC:PACS/SPB/LM/CD	7.47956	3.31465e-08	2.85889	0.000580139	0.561166	174	17	1	0.0494792	3.63793	4.05882	29	0.87592	1.09225	NA
13	39863755	rs9548954	ALC:PACS/SPB/LM/R	8.34247	4.54493e-09	25.3246	0.000115855	2.06564	183	8	1	0.0260417	3.66667	3.875	29	0.882104	1.29295	NA
13	39863755	rs9548954	ALC:PACS/SPB/LM/CD	7.4487	3.55873e-08	4.43648	0.000616794	0.717303	183	8	1	0.0260417	3.66667	3.875	29	0.882104	1.29295	NA
13	48888818	rs9596037	ALC:PACS/SPB/LM/R	8.34247	4.54493e-09	25.3246	0.000115855	2.06564	173	18	1	0.0520833	3.75145	2.94444	29	0.887338	1.0949	NA
13	48888818	rs9596037	ALC:PACS/SPB/LM/CD	7.58051	2.62715e-08	1.75	0.000398675	0.379778	173	18	1	0.0520833	3.75145	2.94444	29	0.887338	1.0949	NA
13	68940835	rs9564508	ALC:PACS/SPB/LM/R	8.34247	4.54493e-09	25.3246	0.000115855	2.06564	167	24	1	0.0677083	3.54491	4.58333	29	0.896512	0.905067	NA
13	68940835	rs9564508	ALC:PACS/SPB/LM/CD	7.73497	1.8409e-08	2.81915	0.000295623	0.573654	167	24	1	0.0677083	3.54491	4.58333	29	0.896512	0.905067	NA
14	26405166	rs76589344	ALC:PACS/SPB/LM/R	8.34247	4.54493e-09	25.3246	0.000115855	2.06564	177	14	1	0.0416667	3.70056	3.35714	29	0.894663	0.866335	NA
14	26405166	rs76589344	ALC:PACS/SPB/LM/CD	7.46403	3.43535e-08	2.645	0.000584441	0.520199	177	14	1	0.0416667	3.70056	3.35714	29	0.894663	0.866335	NA
14	88999939	rs17776366	ALC:PACS/SPB/LM/R	8.34247	4.54493e-09	25.3246	0.000115855	2.06564	172	19	1	0.0546875	3.54651	4.84211	29	0.867099	1.15106	NA
14	88999939	rs17776366	ALC:PACS/SPB/LM/CD	7.81354	1.53624e-08	3.3834	0.000282619	0.64479	172	19	1	0.0546875	3.54651	4.84211	29	0.867099	1.15106	NA
14	97119552	rs12436690	ALC:PACS/SPB/LM/R	8.34247	4.54493e-09	25.3246	0.000115855	2.06564	157	34	1	0.09375	3.71338	3.5	29	0.878054	0.985184	NA
14	97119552	rs12436690	ALC:PACS/SPB/LM/CD	7.46073	3.46154e-08	1.278	0.000581957	0.300718	157	34	1	0.09375	3.71338	3.5	29	0.878054	0.985184	NA
15	54011818	rs12904759	ALC:PACS/SPB/LM/R	8.34247	4.54493e-09	25.3246	0.000115855	2.06564	163	28	1	0.078125	3.63804	3.89286	29	0.854329	1.23405	NA
15	54011818	rs12904759	ALC:PACS/SPB/LM/CD	7.4643	3.43318e-08	1.93249	0.000608885	0.426186	163	28	1	0.078125	3.63804	3.89286	29	0.854329	1.23405	NA
15	88904970	rs3825992	ALC:PACS/SPB/LM/R	8.34247	4.54493e-09	25.3246	0.000115855	2.06564	181	10	1	0.03125	3.69061	3.4	29	0.885226	1.15197	NA
15	88904970	rs3825992	ALC:PACS/SPB/LM/CD	7.45469	3.51004e-08	3.49528	0.000592269	0.621837	181	10	1	0.03125	3.69061	3.4	29	0.885226	1.15197	NA
15	88908037	rs4932448	ALC:PACS/SPB/LM/R	8.34247	4.54493e-09	25.3246	0.000115855	2.06564	177	14	1	0.0416667	3.64972	4	29	0.870152	1.3751	NA
15	88908037	rs4932448	ALC:PACS/SPB/LM/CD	7.46482	3.42911e-08	3.185	0.000605181	0.598501	177	14	1	0.0416667	3.64972	4	29	0.870152	1.3751	NA
15	97237596	rs76014364	ALC:PACS/SPB/LM/R	8.34247	4.54493e-09	25.3246	0.000115855	2.06564	170	21	1	0.0598958	3.77647	2.85714	29	0.897603	0.90222	NA
15	97237596	rs76014364	ALC:PACS/SPB/LM/CD	7.64705	2.25397e-08	1.36806	0.000340318	0.310454	170	21	1	0.0598958	3.77647	2.85714	29	0.897603	0.90222	NA
15	97361937	rs117178171	ALC:PACS/SPB/LM/R	8.34247	4.54493e-09	25.3246	0.000115855	2.06564	175	16	1	0.046875	3.73714	3	29	0.891169	0.981981	NA
15	97361937	rs117178171	ALC:PACS/SPB/LM/CD	7.54649	2.84127e-08	2.04608	0.000450868	0.428758	175	16	1	0.046875	3.73714	3	29	0.891169	0.981981	NA
15	97366111	rs117637191	ALC:PACS/SPB/LM/R	8.34247	4.54493e-09	25.3246	0.000115855	2.06564	175	16	1	0.046875	3.73714	3	29	0.891169	0.981981	NA
15	97366111	rs117637191	ALC:PACS/SPB/LM/CD	7.54649	2.84127e-08	2.04608	0.000450868	0.428758	175	16	1	0.046875	3.73714	3	29	0.891169	0.981981	NA
16	13206350	rs372941	ALC:PACS/SPB/LM/R	8.34247	4.54493e-09	25.3246	0.000115855	2.06564	162	29	1	0.0807292	3.59259	4.13793	29	0.965073	0.703234	NA
16	13206350	rs372941	ALC:PACS/SPB/LM/CD	7.53814	2.8964e-08	2.14233	0.000429058	0.466577	162	29	1	0.0807292	3.59259	4.13793	29	0.965073	0.703234	NA
16	22828378	rs79355736	ALC:PACS/SPB/LM/R	8.34247	4.54493e-09	25.3246	0.000115855	2.06564	173	18	1	0.0520833	3.61272	4.27778	29	0.900394	0.848978	NA
16	22828378	rs79355736	ALC:PACS/SPB/LM/CD	7.53681	2.90529e-08	2.95502	0.000480479	0.578599	173	18	1	0.0520833	3.61272	4.27778	29	0.900394	0.848978	NA
16	79311795	rs9934640	ALC:PACS/SPB/LM/R	8.34247	4.54493e-09	25.3246	0.000115855	2.06564	162	29	1	0.0807292	3.7037	3.51724	29	0.867632	1.12592	NA
16	79311795	rs9934640	ALC:PACS/SPB/LM/CD	7.45539	3.50437e-08	1.49935	0.000586504	0.343004	162	29	1	0.0807292	3.7037	3.51724	29	0.867632	1.12592	NA
17	1191918	rs75488394	ALC:PACS/SPB/LM/R	8.34247	4.54493e-09	25.3246	0.000115855	2.06564	174	17	1	0.0494792	3.66092	3.82353	29	0.884005	0.986265	NA
17	1191918	rs75488394	ALC:PACS/SPB/LM/CD	7.44969	3.55069e-08	2.64969	0.000612669	0.529089	174	17	1	0.0494792	3.66092	3.82353	29	0.884005	0.986265	NA
17	8699272	rs80065146	ALC:PACS/SPB/LM/R	8.34247	4.54493e-09	25.3246	0.000115855	2.06564	184	7	1	0.0234375	3.76087	1.42857	29	0.906268	0.78811	NA
17	8699272	rs80065146	ALC:PACS/SPB/LM/CD	7.91645	1.21213e-08	3.18907	0.000122653	0.566846	184	7	1	0.0234375	3.76087	1.42857	29	0.906268	0.78811	NA
17	9622112	rs34654539	ALC:PACS/SPB/LM/R	8.34247	4.54493e-09	25.3246	0.000115855	2.06564	174	17	1	0.0494792	3.51149	5.35294	29	0.87543	1.11032	NA
17	9622112	rs34654539	ALC:PACS/SPB/LM/CD	8.12187	7.55313e-09	4.00953	0.000140281	0.721834	174	17	1	0.0494792	3.51149	5.35294	29	0.87543	1.11032	NA
17	42048796	rs79911191	ALC:PACS/SPB/LM/R	8.34247	4.54493e-09	25.3246	0.000115855	2.06564	162	29	1	0.0807292	3.64198	3.86207	29	0.862714	1.11249	NA
17	42048796	rs79911191	ALC:PACS/SPB/LM/CD	7.45969	3.46981e-08	1.85656	0.000608457	0.413026	162	29	1	0.0807292	3.64198	3.86207	29	0.862714	1.11249	NA
17	77310739	rs11077899	ALC:PACS/SPB/LM/R	8.34247	4.54493e-09	25.3246	0.000115855	2.06564	170	21	1	0.0598958	3.71765	3.33333	29	0.890655	0.923317	NA
17	77310739	rs11077899	ALC:PACS/SPB/LM/CD	7.47978	3.31297e-08	1.81761	0.000555199	0.395968	170	21	1	0.0598958	3.71765	3.33333	29	0.890655	0.923317	NA
17	77848371	rs76166391	ALC:PACS/SPB/LM/CD	8.53145	2.94138e-09	3.2854	4.07763e-05	0.662598	162	29	1	0.0807292	3.39506	5.24138	29	0.905219	0.946127	NA
17	77848371	rs76166391	ALC:PACS/SPB/LM/R	8.34247	4.54493e-09	25.3246	0.000115855	2.06564	162	29	1	0.0807292	3.39506	5.24138	29	0.905219	0.946127	NA
17	79288236	rs117097073	ALC:PACS/SPB/LM/R	8.34247	4.54493e-09	25.3246	0.000115855	2.06564	169	22	1	0.0625	3.54438	4.68182	29	0.85935	1.19051	NA
17	79288236	rs117097073	ALC:PACS/SPB/LM/CD	7.76792	1.70638e-08	3.02717	0.000317938	0.601274	169	22	1	0.0625	3.54438	4.68182	29	0.85935	1.19051	NA
18	44317544	rs72897945	ALC:PACS/SPB/LM/R	8.34247	4.54493e-09	25.3246	0.000115855	2.06564	183	8	1	0.0260417	3.63934	4.5	29	0.893686	0.877713	NA
18	44317544	rs72897945	ALC:PACS/SPB/LM/CD	7.51715	3.03983e-08	4.87205	0.000516062	0.762156	183	8	1	0.0260417	3.63934	4.5	29	0.893686	0.877713	NA
18	50443277	rs57351601	ALC:PACS/SPB/LM/R	8.34247	4.54493e-09	25.3246	0.000115855	2.06564	178	13	1	0.0390625	3.7809	2.23077	29	0.904837	0.82233	NA
18	50443277	rs57351601	ALC:PACS/SPB/LM/CD	7.8186	1.51846e-08	1.88845	0.000196658	0.396571	178	13	1	0.0390625	3.7809	2.23077	29	0.904837	0.82233	NA
19	22600418	rs9305001	ALC:PACS/SPB/LM/R	8.34247	4.54493e-09	25.3246	0.000115855	2.06564	174	17	1	0.0494792	3.71839	3.23529	29	0.884827	1.05997	NA
19	22600418	rs9305001	ALC:PACS/SPB/LM/CD	7.49072	3.23061e-08	2.12667	0.000528834	0.444238	174	17	1	0.0494792	3.71839	3.23529	29	0.884827	1.05997	NA
19	38162322	rs61729129	ALC:PACS/SPB/LM/R	8.34247	4.54493e-09	25.3246	0.000115855	2.06564	184	7	1	0.0234375	3.57609	6.28571	29	0.880746	1.29468	NA
19	38162322	rs61729129	ALC:PACS/SPB/LM/CD	8.08282	8.26381e-09	6.40325	0.000172261	0.889311	184	7	1	0.0234375	3.57609	6.28571	29	0.880746	1.29468	NA
19	38162322	rs61729129	ALC:PACS/SPB/LM/A	6.64917	2.24301e-07	7.70667	1.19633e-05	1.13943	184	7	1	0.0234375	3.57609	6.28571	29	0.880746	1.29468	NA
19	38162322	rs61729129	ALC:PACS/SPB:M/GLM/A	5.39715	6.47191e-08	7.8225	4.0073e-06	1.17189	158	7	1	0.0271084	3.44937	6.28571	29	0.897491	1.29468	NA
19	45213106	rs189063316	ALC:PACS/SPB/LM/R	8.32039	4.78196e-09	25.3368	0.000120093	2.06897	183	7	1	0.0235602	3.67213	3.42857	29	0.884029	1.06904	NA
19	45213106	rs189063316	ALC:PACS/SPB/LM/CD	7.42801	3.7324e-08	4.52327	0.000625271	0.719282	183	7	1	0.0235602	3.67213	3.42857	29	0.884029	1.06904	NA
19	45227537	rs141492594	ALC:PACS/SPB/LM/R	8.34247	4.54493e-09	25.3246	0.000115855	2.06564	184	7	1	0.0234375	3.68478	3.42857	29	0.888746	1.06904	NA
19	45227537	rs141492594	ALC:PACS/SPB/LM/CD	7.45011	3.54722e-08	4.51256	0.000603366	0.716662	184	7	1	0.0234375	3.68478	3.42857	29	0.888746	1.06904	NA
20	5492254	rs111903613	ALC:PACS/SPB/LM/R	8.34247	4.54493e-09	25.3246	0.000115855	2.06564	174	17	1	0.0494792	3.68966	3.52941	29	0.879423	1.10838	NA
20	5492254	rs111903613	ALC:PACS/SPB/LM/CD	7.44954	3.55193e-08	2.38818	0.00060225	0.487539	174	17	1	0.0494792	3.68966	3.52941	29	0.879423	1.10838	NA
20	39500359	rs6028466	ALC:PACS/SPB/LM/R	8.34247	4.54493e-09	25.3246	0.000115855	2.06564	161	30	1	0.0833333	3.56522	4.26667	29	0.891032	0.912617	NA
20	39500359	rs6028466	ALC:PACS/SPB/LM/CD	7.60394	2.48918e-08	2.23837	0.00041242	0.485742	161	30	1	0.0833333	3.56522	4.26667	29	0.891032	0.912617	NA
20	42029278	rs2223913	ALC:PACS/SPB/LM/R	8.34247	4.54493e-09	25.3246	0.000115855	2.06564	169	22	1	0.0625	3.71006	3.40909	29	0.911581	0.759302	NA
20	42029278	rs2223913	ALC:PACS/SPB/LM/CD	7.46701	3.41183e-08	1.80978	0.000592568	0.395793	169	22	1	0.0625	3.71006	3.40909	29	0.911581	0.759302	NA
20	46267715	rs6094270	ALC:PACS/SPB/LM/R	8.34247	4.54493e-09	25.3246	0.000115855	2.06564	178	13	1	0.0390625	3.69663	3.38462	29	0.883077	1.14379	NA
20	46267715	rs6094270	ALC:PACS/SPB/LM/CD	7.45954	3.47104e-08	2.83613	0.000581931	0.545399	178	13	1	0.0390625	3.69663	3.38462	29	0.883077	1.14379	NA
20	58523583	rs116902331	ALC:PACS/SPB/LM/R	8.34247	4.54493e-09	25.3246	0.000115855	2.06564	175	16	1	0.046875	3.70857	3.3125	29	0.894614	0.874059	NA
20	58523583	rs116902331	ALC:PACS/SPB/LM/CD	7.47388	3.3583e-08	2.31911	0.000568242	0.474137	175	16	1	0.046875	3.70857	3.3125	29	0.894614	0.874059	NA
20	58549479	rs117748942	ALC:PACS/SPB/LM/R	8.34247	4.54493e-09	25.3246	0.000115855	2.06564	174	17	1	0.0494792	3.72989	3.11765	29	0.899249	0.829963	NA
20	58549479	rs117748942	ALC:PACS/SPB/LM/CD	7.51878	3.02842e-08	2.02206	0.00050502	0.426391	174	17	1	0.0494792	3.72989	3.11765	29	0.899249	0.829963	NA
21	38878698	rs74672999	ALC:PACS/SPB/LM/R	8.34247	4.54493e-09	25.3246	0.000115855	2.06564	162	29	1	0.0807292	3.5679	4.27586	29	0.868083	1.03727	NA
21	38878698	rs74672999	ALC:PACS/SPB/LM/CD	7.60248	2.49761e-08	2.28521	0.000438662	0.492599	162	29	1	0.0807292	3.5679	4.27586	29	0.868083	1.03727	NA
22	38165555	rs132966	ALC:PACS/SPB/LM/R	8.34247	4.54493e-09	25.3246	0.000115855	2.06564	158	33	1	0.0911458	3.57595	4.15152	29	0.853715	1.11422	NA
22	38165555	rs132966	ALC:PACS/SPB/LM/CD	7.56031	2.75227e-08	2.0165	0.000496066	0.448627	158	33	1	0.0911458	3.57595	4.15152	29	0.853715	1.11422	NA
22	38167541	rs132986	ALC:PACS/SPB/LM/R	8.34247	4.54493e-09	25.3246	0.000115855	2.06564	158	33	1	0.0911458	3.57595	4.15152	29	0.853715	1.11422	NA
22	38167541	rs132986	ALC:PACS/SPB/LM/CD	7.56031	2.75227e-08	2.0165	0.000496066	0.448627	158	33	1	0.0911458	3.57595	4.15152	29	0.853715	1.11422	NA
22	38218926	rs11089873	ALC:PACS/SPB/LM/R	8.34247	4.54493e-09	25.3246	0.000115855	2.06564	173	18	1	0.0520833	3.66474	3.77778	29	0.868491	1.29304	NA
22	38218926	rs11089873	ALC:PACS/SPB/LM/CD	7.44711	3.5718e-08	2.50314	0.000620213	0.508354	173	18	1	0.0520833	3.66474	3.77778	29	0.868491	1.29304	NA
22	38218926	rs11089873	ALC:ATF/SPB:M/GLM:VERS/A	5.55152	2.38982e-06	99.6782	2.80856e-06	0.688409	151	14	1	0.0481928	97.8126	171.728	400	1.26886	1.25537	NA
8	19332246	rs7845057	ALC:PACS/SPB/LM/R	8.33339	4.64102e-09	25.328	0.000116663	2.06657	153	36	1	0.1	3.47712	4.5	29	0.880175	0.95754	NA
8	19332246	rs7845057	ALC:PACS/SPB/LM/CD	7.82718	1.48873e-08	2.32716	0.000238859	0.512836	153	36	1	0.1	3.47712	4.5	29	0.880175	0.95754	NA
17	77842333	rs76253195	ALC:PACS/SPB/LM/CD	8.52126	3.01118e-09	3.17119	4.31853e-05	0.652596	159	31	1	0.0863874	3.36478	5.16129	29	0.893071	0.958321	NA
17	77842333	rs76253195	ALC:PACS/SPB/LM/R	8.33573	4.61608e-09	25.3421	0.000118802	2.07041	159	31	1	0.0863874	3.36478	5.16129	29	0.893071	0.958321	NA
11	4459326	rs12808116	ALC:PACS/SPB/LM/R	8.32039	4.78196e-09	25.3368	0.000120093	2.06897	181	9	1	0.0287958	3.70718	2.77778	29	0.892228	0.839655	NA
11	4459326	rs12808116	ALC:PACS/SPB/LM/CD	7.51743	3.03787e-08	3.33531	0.000484723	0.597762	181	9	1	0.0287958	3.70718	2.77778	29	0.892228	0.839655	NA
14	32369757	rs28439789	ALC:PACS/SPB/LM/R	8.32039	4.78196e-09	25.3368	0.000120093	2.06897	175	15	1	0.0445026	3.6	4.4	29	0.87729	1.01401	NA
14	32369757	rs28439789	ALC:PACS/SPB/LM/CD	7.53579	2.91215e-08	3.4009	0.00049781	0.633744	175	15	1	0.0445026	3.6	4.4	29	0.87729	1.01401	NA
14	76817778	rs77729313	ALC:PACS/SPB/LM/R	8.32039	4.78196e-09	25.3368	0.000120093	2.06897	182	8	1	0.026178	3.58791	5.375	29	0.890833	0.914391	NA
14	76817778	rs77729313	ALC:PACS/SPB/LM/CD	7.73609	1.83614e-08	5.49316	0.000307087	0.823687	182	8	1	0.026178	3.58791	5.375	29	0.890833	0.914391	NA
17	42074263	rs61292858	ALC:PACS/SPB/LM/R	8.32039	4.78196e-09	25.3368	0.000120093	2.06897	150	40	1	0.109948	3.48	4.35	29	0.852404	1.03038	NA
17	42074263	rs61292858	ALC:PACS/SPB/LM/CD	7.72875	1.86744e-08	2.08765	0.000323533	0.473435	150	40	1	0.109948	3.48	4.35	29	0.852404	1.03038	NA
19	15670174	rs73926853	ALC:PACS/SPB/LM/R	8.32077	4.77788e-09	25.3053	0.000115549	2.06039	157	33	1	0.091623	3.82803	3.06061	29	0.929071	0.752132	NA
19	15670174	rs73926853	ALC:PACS/SPB/LM/CD	7.62903	2.34946e-08	0.818898	0.000376404	0.198661	157	33	1	0.091623	3.82803	3.06061	29	0.929071	0.752132	NA
1	118670738	rs56259287	ALC:PACS/SPB/LM/R	8.29922	5.02093e-09	25.2857	0.000115216	2.05511	170	19	1	0.0552632	3.72353	3.63158	29	0.877643	1.30958	NA
1	118670738	rs56259287	ALC:PACS/SPB/LM/CD	7.4041	3.94367e-08	2.23441	0.000605194	0.462459	170	19	1	0.0552632	3.72353	3.63158	29	0.877643	1.30958	NA
2	217809761	rs1035671	ALC:PACS/SPB/LM/R	8.32077	4.77788e-09	25.3053	0.000115549	2.06039	171	19	1	0.0549738	3.60234	4.52632	29	0.878119	1.07564	NA
2	217809761	rs1035671	ALC:PACS/SPB/LM/CD	7.61028	2.45314e-08	3.07515	0.000411405	0.59745	171	19	1	0.0549738	3.60234	4.52632	29	0.878119	1.07564	NA
5	26322559	rs6862088	ALC:PACS/SPB/LM/R	8.32077	4.77788e-09	25.3053	0.000115549	2.06039	185	5	1	0.0183246	3.68649	4	29	0.887348	1.88562	NA
5	26322559	rs6862088	ALC:PACS/SPB/LM/CD	7.42939	3.72058e-08	5.85689	0.00061482	0.814536	185	5	1	0.0183246	3.68649	4	29	0.887348	1.88562	NA
5	26322559	rs6862088	ALC:PACS/SPB:M/GLM/A	5.40309	3.72049e-09	12.658	3.95283e-06	1.50938	162	2	1	0.0121212	3.59259	3.5	29	0.91369	0.989949	NA
17	77918564	rs16967380	ALC:PACS/SPB/LM/R	8.32077	4.77788e-09	25.3053	0.000115549	2.06039	154	36	1	0.0994764	3.61039	4.05556	29	0.838492	1.27903	NA
17	77918564	rs16967380	ALC:PACS/SPB/LM/CD	7.49724	3.18243e-08	1.80536	0.000558545	0.409194	154	36	1	0.0994764	3.61039	4.05556	29	0.838492	1.27903	NA
17	79217228	rs2606190	ALC:PACS/SPB/LM/R	8.32077	4.77788e-09	25.3053	0.000115549	2.06039	157	33	1	0.091623	3.66879	3.81818	29	0.85823	1.16639	NA
17	79217228	rs2606190	ALC:PACS/SPB/LM/CD	7.43105	3.70636e-08	1.63625	0.000616959	0.372421	157	33	1	0.091623	3.66879	3.81818	29	0.85823	1.16639	NA
19	834463	rs117674435	ALC:PACS/SPB/LM/R	8.32077	4.77788e-09	25.3053	0.000115549	2.06039	177	13	1	0.039267	3.71751	3.38462	29	0.923514	0.634854	NA
19	834463	rs117674435	ALC:PACS/SPB/LM/CD	7.44043	3.62719e-08	2.81833	0.000608432	0.540791	177	13	1	0.039267	3.71751	3.38462	29	0.923514	0.634854	NA
17	77855384	rs9910318	ALC:PACS/SPB/LM/R	8.30972	4.90099e-09	25.3105	0.00011774	2.06181	138	52	1	0.141361	3.60145	3.92308	29	0.894046	0.897844	NA
17	77855384	rs9910318	ALC:PACS/SPB/LM/CD	7.46241	3.44815e-08	1.3653	0.000549767	0.329676	138	52	1	0.141361	3.60145	3.92308	29	0.894046	0.897844	NA
1	162884355	rs2343479	ALC:PACS/SPB/LM/R	8.27211	5.34431e-09	17.8789	3.34802e-05	1.78129	153	37	2	0.106771	3.5098	4.08108	21.5	0.852534	0.997368	4.34366
1	162884355	rs2343479	ALC:PACS/SPB/LM/CD	7.50055	3.15826e-08	2.23207	0.000146657	0.487609	153	37	2	0.106771	3.5098	4.08108	21.5	0.852534	0.997368	4.34366
1	162905181	rs10799880	ALC:PACS/SPB/LM/R	8.27211	5.34431e-09	17.8789	3.34802e-05	1.78129	163	27	2	0.0807292	3.62577	3.59259	21.5	0.854869	1.10563	4.34366
1	162905181	rs10799880	ALC:PACS/SPB/LM/CD	7.37649	4.20249e-08	2.16617	0.00019077	0.459235	163	27	2	0.0807292	3.62577	3.59259	21.5	0.854869	1.10563	4.34366
11	27658369	rs6265	ALC:PACS/SPB/LM/R	6.27789	5.27358e-07	12.7249	0.000120027	1.50993	142	47	3	0.138021	3.33099	4.44681	16.3333	0.953868	0.800464	1.69979	Smoking initiation (ever regular vs never regular)	9e-29
11	27658369	rs6265	ALC:PACS/SPB/LM/CD	5.98839	1.0271e-06	2.37129	0.000116188	0.525089	142	47	3	0.138021	3.33099	4.44681	16.3333	0.953868	0.800464	1.69979	Smoking initiation (ever regular vs never regular)	9e-29
2	217821221	rs78744613	ALC:PACS/SPB/LM/R	8.30308	4.97641e-09	25.3158	0.000119377	2.06324	179	11	1	0.0340314	3.64804	4.27273	29	0.874604	1.32376	NA
2	217821221	rs78744613	ALC:PACS/SPB/LM/CD	7.45766	3.48611e-08	3.92359	0.000583449	0.678951	179	11	1	0.0340314	3.64804	4.27273	29	0.874604	1.32376	NA
3	54517130	rs73091697	ALC:PACS/SPB/LM/R	8.30308	4.97641e-09	25.3158	0.000119377	2.06324	153	37	1	0.102094	3.62745	3.91892	29	0.895921	0.881977	NA
3	54517130	rs73091697	ALC:PACS/SPB/LM/CD	7.43837	3.64444e-08	1.63899	0.000581818	0.377527	153	37	1	0.102094	3.62745	3.91892	29	0.895921	0.881977	NA
8	131624899	rs77850744	ALC:PACS/SPB/LM/R	8.30308	4.97641e-09	25.3158	0.000119377	2.06324	172	18	1	0.052356	3.56395	4.83333	29	0.889317	0.958249	NA
8	131624899	rs77850744	ALC:PACS/SPB/LM/CD	7.74193	1.81165e-08	3.4495	0.000285074	0.649531	172	18	1	0.052356	3.56395	4.83333	29	0.889317	0.958249	NA
13	39774941	rs117468781	ALC:PACS/SPB/LM/R	8.30308	4.97641e-09	25.3158	0.000119377	2.06324	182	8	1	0.026178	3.66484	4.125	29	0.880374	1.33457	NA
13	39774941	rs117468781	ALC:PACS/SPB/LM/CD	7.42679	3.74291e-08	4.60356	0.00061745	0.733769	182	8	1	0.026178	3.66484	4.125	29	0.880374	1.33457	NA
19	22592836	rs7260388	ALC:PACS/SPB/LM/R	8.30308	4.97641e-09	25.3158	0.000119377	2.06324	172	18	1	0.052356	3.7093	3.44444	29	0.879526	1.11427	NA
19	22592836	rs7260388	ALC:PACS/SPB/LM/CD	7.42068	3.79596e-08	2.19358	0.000598931	0.456585	172	18	1	0.052356	3.7093	3.44444	29	0.879526	1.11427	NA
1	240954550	rs431188	ALC:PACS/SPB/LM/R	8.29922	5.02093e-09	25.2857	0.000115216	2.05511	163	26	1	0.0736842	3.6135	4.34615	29	0.887649	0.98788	NA
1	240954550	rs431188	ALC:PACS/SPB/LM/CD	7.55622	2.77833e-08	2.44548	0.00042999	0.511469	163	26	1	0.0736842	3.6135	4.34615	29	0.887649	0.98788	NA
6	7391688	rs4959432	ALC:PACS/SPB/LM/R	8.30084	5.00217e-09	25.3211	0.000120439	2.06467	158	32	1	0.0890052	3.71519	3.5	29	0.867403	1.07929	NA
6	7391688	rs4959432	ALC:PACS/SPB/LM/CD	7.41963	3.80516e-08	1.3493	0.000599382	0.31425	158	32	1	0.0890052	3.71519	3.5	29	0.867403	1.07929	NA
20	25490933	rs74385673	ALC:PACS/SPB/LM/R	8.30084	5.00217e-09	25.3211	0.000120439	2.06467	168	22	1	0.0628272	3.74405	3.18182	29	0.88662	0.975814	NA
20	25490933	rs74385673	ALC:PACS/SPB/LM/CD	7.48228	3.29397e-08	1.58907	0.000502383	0.354061	168	22	1	0.0628272	3.74405	3.18182	29	0.88662	0.975814	NA
21	37064463	rs117003164	ALC:PACS/SPB/LM/R	8.27866	5.26435e-09	25.3333	0.000124858	2.06801	182	7	1	0.0236842	3.66484	3.71429	29	0.877859	1.32109	NA
21	37064463	rs117003164	ALC:PACS/SPB/LM/CD	7.38251	4.14463e-08	4.70981	0.000663447	0.737797	182	7	1	0.0236842	3.66484	3.71429	29	0.877859	1.32109	NA
20	25659199	rs78574737	ALC:PACS/SPB/LM/R	8.28752	5.15794e-09	25.3122	0.000120511	2.06226	167	22	1	0.0631579	3.75449	3.18182	29	0.888677	0.975814	NA
20	25659199	rs78574737	ALC:PACS/SPB/LM/CD	7.47208	3.37228e-08	1.5802	0.000498652	0.351687	167	22	1	0.0631579	3.75449	3.18182	29	0.888677	0.975814	NA
15	31000989	rs80231271	ALC:PACS/SPB/LM/CD	8.1209	7.57014e-09	7.188	6.97054e-06	0.899641	187	4	1	0.015625	3.51872	16.75	6	0.921045	1.38191	NA
15	31000989	rs80231271	ALC:PACS/SPB/LM/D	7.81781	1.52121e-08	11.0813	3.10203e-06	1.42293	187	4	1	0.015625	3.51872	16.75	6	0.921045	1.38191	NA
15	31000989	rs80231271	ALC:PACS/SPB/LM/A	6.79182	1.61502e-07	9.50794	2.38607e-05	1.28057	187	4	1	0.015625	3.51872	16.75	6	0.921045	1.38191	NA
15	31000989	rs80231271	ALC:PACS/SPB:M/GLM/D	6.21599	3.13393e-09	11.2149	6.08153e-07	1.46164	161	4	1	0.0180723	3.38509	16.75	6	0.954086	1.38191	NA
15	31000989	rs80231271	ALC:PACS/SPB:M/GLM/CD	5.90003	1.24071e-09	7.28019	1.25883e-06	0.921194	161	4	1	0.0180723	3.38509	16.75	6	0.954086	1.38191	NA
15	31000989	rs80231271	ALC:PACS/SPB/GLM/D	5.50835	1.52121e-08	11.0813	3.10203e-06	1.42293	187	4	1	0.015625	3.51872	16.75	6	0.921045	1.38191	NA
19	22612079	rs74915250	ALC:PACS/SPB/LM/R	8.24866	5.64085e-09	25.2819	0.000120992	2.05409	182	6	1	0.021164	3.66484	5.33333	29	0.882346	1.77123	NA
19	22612079	rs74915250	ALC:PACS/SPB/LM/CD	7.55873	2.7623e-08	6.12596	0.000439848	0.847755	182	6	1	0.021164	3.66484	5.33333	29	0.882346	1.77123	NA
19	22612079	rs74915250	ALC:PACS/SPB/LM/A	5.71294	1.93671e-06	7.55811	5.66625e-05	1.11423	182	6	1	0.021164	3.66484	5.33333	29	0.882346	1.77123	NA
2	1850783	rs62114690	ALC:PACS/SPB/LM/R	8.27903	5.25985e-09	25.3016	0.000120136	2.05939	162	27	1	0.0763158	3.62963	4.11111	29	0.870389	1.0633	NA
2	1850783	rs62114690	ALC:PACS/SPB/LM/CD	7.45093	3.5405e-08	2.17825	0.000559753	0.467869	162	27	1	0.0763158	3.62963	4.11111	29	0.870389	1.0633	NA
6	70756669	rs6941789	ALC:PACS/SPB/LM/R	8.27903	5.25985e-09	25.3016	0.000120136	2.05939	168	21	1	0.0605263	3.68452	3.80952	29	0.879	1.05812	NA
6	70756669	rs6941789	ALC:PACS/SPB/LM/CD	7.38637	4.10796e-08	2.24497	0.000638122	0.469474	168	21	1	0.0605263	3.68452	3.80952	29	0.879	1.05812	NA
12	26486427	rs376239453	ALC:PACS/SPB/LM/R	8.25863	5.51271e-09	25.3404	0.000128315	2.06995	161	27	1	0.0767196	3.5528	4.2963	29	0.838596	1.24497	NA
12	26486427	rs376239453	ALC:PACS/SPB/LM/CD	7.52472	2.98733e-08	2.40992	0.000508607	0.513335	161	27	1	0.0767196	3.5528	4.2963	29	0.838596	1.24497	NA
20	62983959	rs4809442	ALC:ATF/SPB:F/GLM:VERS/CD	8.87583	3.38254e-05	41.1961	1.33098e-09	0.602497	9	11	5	0.42	37.4444	66.0364	123.1	3.18936	2.96954	2.65899
20	62983959	rs4809442	ALC:ATF/SPB:F/GLM:VERS/A	6.33615	1.90433e-05	45.1358	4.61157e-07	0.660825	9	11	5	0.42	37.4444	66.0364	123.1	3.18936	2.96954	2.65899
20	62983959	rs4809442	ALC:ATF/SPB:F/GLM:VERS/R	5.44978	7.51271e-05	70.2647	3.54991e-06	0.844445	9	11	5	0.42	37.4444	66.0364	123.1	3.18936	2.96954	2.65899
2	14660625	rs765786	ALC:ATF/SPB:F/GLM:VERS/CD	8.83607	5.33334e-06	47.9182	1.45859e-09	0.733313	7	15	4	0.442308	47.2857	57.96	135.5	2.82804	2.26153	3.44059
2	14660625	rs765786	ALC:ATF/SPB:F/GLM:VERS/R	8.02762	2.61372e-06	89.0833	9.38374e-09	1.07131	7	15	4	0.442308	47.2857	57.96	135.5	2.82804	2.26153	3.44059
5	15048671	rs75202106	ALC:PACS/SPB/LM/CD	8.53527	2.91562e-09	0.115251	1.76689e-05	0.0298186	164	24	1	0.0687831	3.95122	1.83333	29	0.931691	0.660253	NA
5	15048671	rs75202106	ALC:PACS/SPB/LM/R	8.2283	5.91157e-09	25.3191	0.00012942	2.06415	164	24	1	0.0687831	3.95122	1.83333	29	0.931691	0.660253	NA
1	18271315	rs4920468	ALC:ATF/SPB/LM:VERS/R	8.72804	1.87051e-09	332.908	6.3831e-07	1.47679	169	21	2	0.0651042	98.0094	89.9857	431.5	1.24391	1.57391	2.37445
1	18271315	rs4920468	ALC:ATF/SPB/LM:VERS/CD	8.07276	8.45737e-09	35.4669	1.84354e-06	0.288176	169	21	2	0.0651042	98.0094	89.9857	431.5	1.24391	1.57391	2.37445
1	18271315	rs4920468	ALC:ATF/SPB/GLM:VERS/R	6.19497	1.87051e-09	332.908	6.3831e-07	1.47679	169	21	2	0.0651042	98.0094	89.9857	431.5	1.24391	1.57391	2.37445
1	18271315	rs4920468	ALC:ATF/SPB:M/GLM:VERS/CD	5.92191	2.11142e-08	30.2319	1.19698e-06	0.235005	145	19	2	0.0692771	103.619	88.7474	431.5	1.25694	1.51623	2.37445
1	18271315	rs4920468	ALC:ATF/SPB:M/GLM:VERS/R	5.89521	1.07033e-08	326.485	1.27288e-06	1.41425	145	19	2	0.0692771	103.619	88.7474	431.5	1.25694	1.51623	2.37445
1	18271315	rs4920468	ALC:ATF/SPB/GLM:VERS/CD	5.73435	8.45737e-09	35.4669	1.84354e-06	0.288176	169	21	2	0.0651042	98.0094	89.9857	431.5	1.24391	1.57391	2.37445
16	11656974	rs9934326	ALC:VAS/SPB/LM/R	8.70732	1.9619e-09	6.48404	1.07273e-05	1.66339	119	69	2	0.192105	1.61345	1.34783	8	1.03237	1.10238	Inf
16	11656974	rs9934326	ALC:VAS/SPB/LM/CD	8.1182	7.61734e-09	0.191055	2.50751e-05	0.118131	119	69	2	0.192105	1.61345	1.34783	8	1.03237	1.10238	Inf
3	115571242	rs7638568	ALC:PACS/SPB:M/GLM/D	6.68482	9.27502e-09	8.28283	2.06623e-07	1.26154	154	8	1	0.0306748	3.27273	11.375	13	0.952426	1.10049	NA
3	115571242	rs7638568	ALC:PACS/SPB:M/GLM/A	6.26863	2.362e-09	8.22215	5.38725e-07	1.21318	154	8	1	0.0306748	3.27273	11.375	13	0.952426	1.10049	NA
3	115571242	rs7638568	ALC:PACS/SPB:M/GLM/CD	5.82338	6.72452e-08	6.99946	1.50182e-06	0.970331	154	8	1	0.0306748	3.27273	11.375	13	0.952426	1.10049	NA
3	115571242	rs7638568	ALC:PACS/SPB/LM/A	5.76759	1.70768e-06	6.00717	3.11117e-05	0.98015	177	11	1	0.0343915	3.44068	9	13	0.914448	0.932255	NA
15	89363369	rs74650695	ALC:ATF/SPB:M/GLM:VERS/CD	8.17333	2.4037e-09	173.356	6.70911e-09	0.970983	158	8	0	0.0240964	97.0436	280.125	NA	1.38448	1.43951	NA
15	89363369	rs74650695	ALC:ATF/SPB:M/GLM:VERS/D	8.17333	2.4037e-09	173.356	6.70911e-09	0.970983	158	8	0	0.0240964	97.0436	280.125	NA	1.38448	1.43951	NA
15	89363369	rs74650695	ALC:ATF/SPB:M/GLM:VERS/A	6.79152	9.08915e-09	168.504	1.61613e-07	0.923157	158	8	0	0.0240964	97.0436	280.125	NA	1.38448	1.43951	NA
15	89363369	rs74650695	ALC:ATF/SPB/LM:VERS/CD	6.56886	2.69863e-07	132.625	5.2289e-07	0.832351	182	10	0	0.0260417	93.1829	235.7	NA	1.37905	1.20401	NA
15	89363369	rs74650695	ALC:ATF/SPB/LM:VERS/D	6.56886	2.69863e-07	132.625	5.2289e-07	0.832351	182	10	0	0.0260417	93.1829	235.7	NA	1.37905	1.20401	NA
15	89363369	rs74650695	ALC:ATF/SPB/GLM:VERS/CD	6.28159	2.69863e-07	132.625	5.2289e-07	0.832351	182	10	0	0.0260417	93.1829	235.7	NA	1.37905	1.20401	NA
15	89363369	rs74650695	ALC:ATF/SPB/GLM:VERS/D	6.28159	2.69863e-07	132.625	5.2289e-07	0.832351	182	10	0	0.0260417	93.1829	235.7	NA	1.37905	1.20401	NA
15	89363369	rs74650695	ALC:ATF/SPB/LM:VERS/A	6.2176	6.05905e-07	128.292	4.3141e-06	0.788433	182	10	0	0.0260417	93.1829	235.7	NA	1.37905	1.20401	NA
15	89363369	rs74650695	ALC:ATF/SPB/GLM:VERS/A	5.36511	6.05905e-07	128.292	4.3141e-06	0.788433	182	10	0	0.0260417	93.1829	235.7	NA	1.37905	1.20401	NA
2	45041952	rs2342421	ALC:OCSD/SPB/GLM/A	8.61039	4.22237e-08	-7.65328	2.45253e-09	-0.808178	109	66	16	0.256545	15.7431	7.40909	3.5625	1.22854	0.80855	0.491535
2	45041952	rs2342421	ALC:OCSD/SPB/GLM/D	7.68661	1.24996e-07	-9.08458	2.05776e-08	-0.860504	109	66	16	0.256545	15.7431	7.40909	3.5625	1.22854	0.80855	0.491535
2	45041952	rs2342421	ALC:OCSD/SPB/GLM/CD	7.46897	4.22332e-07	-6.99481	3.39648e-08	-0.749907	109	66	16	0.256545	15.7431	7.40909	3.5625	1.22854	0.80855	0.491535
2	45041952	rs2342421	ALC:OCSD/SPB/LM/A	7.37444	4.22237e-08	-7.65328	2.45253e-09	-0.808178	109	66	16	0.256545	15.7431	7.40909	3.5625	1.22854	0.80855	0.491535
2	45041952	rs2342421	ALC:OCSD/SPB:M/GLM/A	7.03952	7.78651e-07	-7.19036	9.13029e-08	-0.784677	91	59	15	0.269697	15.1648	7.23729	3.66667	1.19341	0.789922	0.489563
2	45041952	rs2342421	ALC:OCSD/SPB/LM/D	6.9031	1.24996e-07	-9.08458	2.05776e-08	-0.860504	109	66	16	0.256545	15.7431	7.40909	3.5625	1.22854	0.80855	0.491535
2	45041952	rs2342421	ALC:OCSD/SPB/LM/CD	6.37435	4.22332e-07	-6.99481	3.39648e-08	-0.749907	109	66	16	0.256545	15.7431	7.40909	3.5625	1.22854	0.80855	0.491535
2	45041952	rs2342421	ALC:OCSD/SPB:M/GLM/D	6.28386	1.85635e-06	-8.65132	5.20167e-07	-0.8451	91	59	15	0.269697	15.1648	7.23729	3.66667	1.19341	0.789922	0.489563
2	45041952	rs2342421	ALC:OCSD/SPB:M/GLM/CD	5.95976	6.50325e-06	-6.58298	1.09709e-06	-0.72847	91	59	15	0.269697	15.1648	7.23729	3.66667	1.19341	0.789922	0.489563
6	54856286	rs9475047	ALC:ATF/SPB/LM:VERS/R	7.58999	2.57047e-08	439.326	6.23338e-05	1.53484	185	6	1	0.0208333	96.4924	150.867	560	1.3416	0.789269	NA
6	54856286	rs9475047	ALC:ATF/SPB/LM:VERS/CD	7.18339	6.55561e-08	116.589	8.7269e-05	0.638428	185	6	1	0.0208333	96.4924	150.867	560	1.3416	0.789269	NA
6	54856286	rs9475047	ALC:ATF/SPB:M/GLM:VERS/A	6.58936	2.59309e-09	201.455	2.57421e-07	0.975914	161	4	1	0.0180723	100.565	205.75	560	1.34488	0.931467	NA
6	54856286	rs9475047	ALC:ATF/SPB/LM:VERS/A	6.22912	5.90041e-07	143.268	5.4902e-06	0.83689	185	6	1	0.0208333	96.4924	150.867	560	1.3416	0.789269	NA
3	13332744	rs6806084	ALC:TAI/SPB:F/GLM/CD	8.57799	1.10156e-05	-8.92857	2.64245e-09	-0.193065	7	12	7	0.5	53.7143	48.3333	35.8571	12.0396	7.94921	6.56747
3	13332744	rs6806084	ALC:TAI/SPB:F/GLM/R	7.91071	1.03802e-05	-14.4586	1.22825e-08	-0.338776	7	12	7	0.5	53.7143	48.3333	35.8571	12.0396	7.94921	6.56747
3	13332744	rs6806084	ALC:TAI/SPB:F/GLM/A	5.57792	1.45161e-05	-9.61538	2.64292e-06	-0.20787	7	12	7	0.5	53.7143	48.3333	35.8571	12.0396	7.94921	6.56747
11	76271374	rs4945061	ALC:ATF/SPB:M/GLM:VERS/D	8.54952	3.90427e-07	-69.3833	2.82153e-09	-0.605816	51	82	33	0.445783	150.591	86.3472	85.2515	1.20268	1.46532	1.71349
11	76271374	rs4945061	ALC:ATF/SPB/GLM:VERS/D	7.92485	7.31665e-07	-61.1621	1.1889e-08	-0.565041	60	95	37	0.440104	140	83.6365	80.2919	1.17099	1.48807	1.6257
11	76271374	rs4945061	ALC:ATF/SPB:M/GLM:VERS/CD	7.66174	2.54748e-06	-39.9245	2.17903e-08	-0.386817	51	82	33	0.445783	150.591	86.3472	85.2515	1.20268	1.46532	1.71349
11	76271374	rs4945061	ALC:ATF/SPB/GLM:VERS/CD	7.06809	4.62017e-06	-35.6186	8.54882e-08	-0.365443	60	95	37	0.440104	140	83.6365	80.2919	1.17099	1.48807	1.6257
11	76271374	rs4945061	ALC:ATF/SPB:M/GLM:VERS/A	6.20103	1.357e-05	-39.786	6.29458e-07	-0.385702	51	82	33	0.445783	150.591	86.3472	85.2515	1.20268	1.46532	1.71349
11	76271374	rs4945061	ALC:ATF/SPB/LM:VERS/D	6.13569	7.31665e-07	-61.1621	1.1889e-08	-0.565041	60	95	37	0.440104	140	83.6365	80.2919	1.17099	1.48807	1.6257
11	76271374	rs4945061	ALC:ATF/SPB/GLM:VERS/A	5.85398	1.8862e-05	-35.3859	1.39966e-06	-0.361361	60	95	37	0.440104	140	83.6365	80.2919	1.17099	1.48807	1.6257
11	76271374	rs4945061	ALC:ATF/SPB/LM:VERS/CD	5.33534	4.62017e-06	-35.6186	8.54882e-08	-0.365443	60	95	37	0.440104	140	83.6365	80.2919	1.17099	1.48807	1.6257
3	174379206	rs66713984	ALC:OCSD/SPB:F/GLM/D	8.52346	1.87001e-05	19.7908	2.99599e-09	2.20786	9	12	5	0.423077	2.44444	21.1667	24.8	0.610581	1.94133	2.27628
3	174379206	rs66713984	ALC:OCSD/SPB:F/GLM/CD	7.47238	9.83897e-05	12.2184	3.36996e-08	0.788389	9	12	5	0.423077	2.44444	21.1667	24.8	0.610581	1.94133	2.27628
5	25328004	rs4386702	ALC:ATF/SPB/LM:VERS/R	8.50955	3.09348e-09	230.03	4.10636e-08	1.22168	143	43	4	0.134211	95.2069	93.9558	326.25	1.33997	1.36291	1.28138
5	25328004	rs4386702	ALC:ATF/SPB/LM:VERS/CD	7.69469	2.0198e-08	29.5401	2.40724e-07	0.262363	143	43	4	0.134211	95.2069	93.9558	326.25	1.33997	1.36291	1.28138
5	25328004	rs4386702	ALC:ATF/SPB/GLM:VERS/R	7.38654	3.09348e-09	230.03	4.10636e-08	1.22168	143	43	4	0.134211	95.2069	93.9558	326.25	1.33997	1.36291	1.28138
5	25328004	rs4386702	ALC:ATF/SPB:M/GLM:VERS/R	6.90359	2.23739e-08	223.857	1.24858e-07	1.16032	123	37	4	0.137195	99.591	98.9892	326.25	1.3428	1.38596	1.28138
5	25328004	rs4386702	ALC:ATF/SPB/GLM:VERS/CD	6.61848	2.0198e-08	29.5401	2.40724e-07	0.262363	143	43	4	0.134211	95.2069	93.9558	326.25	1.33997	1.36291	1.28138
5	25328004	rs4386702	ALC:ATF/SPB:M/GLM:VERS/CD	6.11262	1.47082e-07	32.9156	7.71573e-07	0.275104	123	37	4	0.137195	99.591	98.9892	326.25	1.3428	1.38596	1.28138
14	34375170	rs1958589	ALC:PACS/SPB/LM/R	7.81781	1.52121e-08	11.0813	2.64443e-06	1.42293	146	41	5	0.132812	3.26712	4.41463	14.6	0.928684	0.971511	1.20707
14	34375170	rs1958589	ALC:PACS/SPB/LM/CD	7.47185	3.37406e-08	2.79914	3.24439e-06	0.580838	146	41	5	0.132812	3.26712	4.41463	14.6	0.928684	0.971511	1.20707
14	34375170	rs1958589	ALC:PACS/SPB:M/GLM/R	6.32272	3.13393e-09	11.2149	4.7564e-07	1.46164	129	32	5	0.126506	3.23256	4	14.6	0.967457	0.978534	1.20707
14	34375170	rs1958589	ALC:PACS/SPB:M/GLM/CD	5.79291	1.55488e-08	2.84333	1.61098e-06	0.58675	129	32	5	0.126506	3.23256	4	14.6	0.967457	0.978534	1.20707
14	34375170	rs1958589	ALC:PACS/SPB/GLM/R	5.57767	1.52121e-08	11.0813	2.64443e-06	1.42293	146	41	5	0.132812	3.26712	4.41463	14.6	0.928684	0.971511	1.20707
14	34375170	rs1958589	ALC:PACS/SPB/GLM/CD	5.48887	3.37406e-08	2.79914	3.24439e-06	0.580838	146	41	5	0.132812	3.26712	4.41463	14.6	0.928684	0.971511	1.20707
1	91741128	rs72714494	ALC:ATF/SPB/LM:VERS/A	8.48735	3.25573e-09	179.526	1.12955e-07	1.01658	186	5	1	0.0182292	96.2661	170.16	560	1.25446	1.80211	NA
1	91741128	rs72714494	ALC:ATF/SPB/LM:VERS/CD	7.82726	1.48848e-08	141.15	2.67951e-05	0.724857	186	5	1	0.0182292	96.2661	170.16	560	1.25446	1.80211	NA
1	91741128	rs72714494	ALC:ATF/SPB/LM:VERS/R	7.58999	2.57047e-08	439.326	6.23338e-05	1.53484	186	5	1	0.0182292	96.2661	170.16	560	1.25446	1.80211	NA
1	91741128	rs72714494	ALC:ATF/SPB/GLM:VERS/A	6.9471	3.25573e-09	179.526	1.12955e-07	1.01658	186	5	1	0.0182292	96.2661	170.16	560	1.25446	1.80211	NA
1	91741128	rs72714494	ALC:ATF/SPB:M/GLM:VERS/A	6.24875	3.82933e-08	172.29	5.63962e-07	0.948722	160	5	1	0.0210843	101.019	170.16	560	1.25796	1.80211	NA
16	23743240	rs780169	ALC:ATF/SPB:F/GLM:VERS/CD	8.477	8.08336e-06	37.0333	3.33424e-09	0.462473	19	6	1	0.153846	50.8105	123.5	36	2.63725	3.4344	NA
16	23743240	rs780169	ALC:ATF/SPB:F/GLM:VERS/D	5.76534	0.000112849	60.5226	1.71658e-06	0.786554	19	6	1	0.153846	50.8105	123.5	36	2.63725	3.4344	NA
3	115583143	rs10934299	ALC:PACS/SPB:M/GLM/D	6.62612	1.4302e-08	7.74359	2.36524e-07	1.21727	156	9	1	0.0331325	3.25641	10.7778	13	0.951432	1.09605	NA
3	115583143	rs10934299	ALC:PACS/SPB:M/GLM/A	6.2346	3.6453e-09	7.71453	5.82636e-07	1.17092	156	9	1	0.0331325	3.25641	10.7778	13	0.951432	1.09605	NA
3	115583143	rs10934299	ALC:PACS/SPB:M/GLM/CD	5.77643	9.56393e-08	6.6863	1.67329e-06	0.95855	156	9	1	0.0331325	3.25641	10.7778	13	0.951432	1.09605	NA
3	115583143	rs10934299	ALC:PACS/SPB/LM/A	5.76086	1.73436e-06	5.75985	2.89744e-05	0.955957	179	12	1	0.0364583	3.42458	8.75	13	0.913476	0.946417	NA
11	110950006	rs4938078	ALC:TAI/SPB:F/GLM/CD	8.43298	1.9796e-05	-11.9245	3.68995e-09	-0.281232	17	8	1	0.192308	51.0588	38.875	28	8.73294	7.36786	NA
11	110950006	rs4938078	ALC:TAI/SPB:F/GLM/D	7.41435	1.27482e-05	-13.3922	3.85166e-08	-0.304203	17	8	1	0.192308	51.0588	38.875	28	8.73294	7.36786	NA
11	110950006	rs4938078	ALC:TAI/SPB:F/GLM/A	5.92515	1.98342e-05	-12.0381	1.18809e-06	-0.283684	17	8	1	0.192308	51.0588	38.875	28	8.73294	7.36786	NA
12	131696842	rs35795785	ALC:PACS/SPB/LM/R	7.8102	1.54812e-08	17.3737	4.29951e-05	1.75631	175	15	2	0.0494792	3.76	2.06667	21	0.915357	0.642318	1.85616
12	131696842	rs35795785	ALC:PACS/SPB/LM/CD	7.43193	3.69892e-08	2.01998	5.40666e-05	0.413252	175	15	2	0.0494792	3.76	2.06667	21	0.915357	0.642318	1.85616
1	28758954	rs2251919	ALC:PACS/SPB/LM/R	7.77096	1.69447e-08	17.3651	4.4645e-05	1.75394	171	18	2	0.0575916	3.57895	4.16667	21	0.897432	0.849997	1.85616
1	28758954	rs2251919	ALC:PACS/SPB/LM/CD	6.96107	1.09378e-07	3.19746	0.000205357	0.596329	171	18	2	0.0575916	3.57895	4.16667	21	0.897432	0.849997	1.85616
10	113567726	rs3900676	ALC:ATF/SPB:F/GLM:VERS/D	8.37097	1.72493e-06	-77.587	4.25629e-09	-0.912521	5	16	5	0.5	129.6	50.65	56.8	3.54397	2.3309	3.01644
10	113567726	rs3900676	ALC:ATF/SPB:F/GLM:VERS/CD	7.27765	1.25927e-05	-36.4	5.27658e-08	-0.548048	5	16	5	0.5	129.6	50.65	56.8	3.54397	2.3309	3.01644
1	218384313	rs17047740	ALC:PACS/SPB:M/GLM/CD	6.29678	5.11e-09	10.1437	5.04921e-07	1.39187	160	6	0	0.0180723	3.35625	13.5	NA	0.951882	1.24754	NA
1	218384313	rs17047740	ALC:PACS/SPB:M/GLM/D	6.29678	5.11e-09	10.1437	5.04921e-07	1.39187	160	6	0	0.0180723	3.35625	13.5	NA	0.951882	1.24754	NA
1	218384313	rs17047740	ALC:PACS/SPB/LM/CD	6.0328	9.27257e-07	7.3133	1.54589e-05	1.13492	183	9	0	0.0234375	3.46448	10.7778	NA	0.90528	1.13485	NA
1	218384313	rs17047740	ALC:PACS/SPB/LM/D	6.0328	9.27257e-07	7.3133	1.54589e-05	1.13492	183	9	0	0.0234375	3.46448	10.7778	NA	0.90528	1.13485	NA
1	218384313	rs17047740	ALC:PACS/SPB/LM/A	5.76391	1.72224e-06	7.13778	5.47703e-05	1.0855	183	9	0	0.0234375	3.46448	10.7778	NA	0.90528	1.13485	NA
1	218386269	rs77620595	ALC:PACS/SPB:M/GLM/CD	6.26179	5.79623e-09	10.1352	5.47278e-07	1.38933	159	6	0	0.0181818	3.36478	13.5	NA	0.951741	1.24754	NA
1	218386269	rs77620595	ALC:PACS/SPB:M/GLM/D	6.26179	5.79623e-09	10.1352	5.47278e-07	1.38933	159	6	0	0.0181818	3.36478	13.5	NA	0.951741	1.24754	NA
1	218386269	rs77620595	ALC:PACS/SPB/LM/CD	5.99491	1.01179e-06	7.30525	1.64189e-05	1.1326	182	9	0	0.0235602	3.47253	10.7778	NA	0.905253	1.13485	NA
1	218386269	rs77620595	ALC:PACS/SPB/LM/D	5.99491	1.01179e-06	7.30525	1.64189e-05	1.1326	182	9	0	0.0235602	3.47253	10.7778	NA	0.905253	1.13485	NA
1	218386269	rs77620595	ALC:PACS/SPB/LM/A	5.7276	1.87241e-06	7.12898	5.76861e-05	1.08309	182	9	0	0.0235602	3.47253	10.7778	NA	0.905253	1.13485	NA
7	15212012	rs73054551	ALC:ATF/SPB/LM:VERS/R	8.22195	5.99866e-09	267.011	3.67267e-06	1.19055	152	37	3	0.111979	96.6381	93.9541	383.667	1.18812	2.12385	2.42621
7	15212012	rs73054551	ALC:ATF/SPB/LM:VERS/CD	7.32955	4.68224e-08	34.7509	2.29795e-05	0.290853	152	37	3	0.111979	96.6381	93.9541	383.667	1.18812	2.12385	2.42621
7	15212012	rs73054551	ALC:ATF/SPB/GLM:VERS/R	5.43502	5.99866e-09	267.011	3.67267e-06	1.19055	152	37	3	0.111979	96.6381	93.9541	383.667	1.18812	2.12385	2.42621
6	16796383	rs642859	ALC:TAI/SPB:F/GLM/D	8.21689	5.63494e-06	13.732	6.06893e-09	0.312422	9	11	6	0.442308	37.4444	50.0909	53.1667	6.2168	10.5156	7.69267
6	16796383	rs642859	ALC:TAI/SPB:F/GLM/CD	7.58288	2.46001e-05	8.27559	2.61289e-08	0.176656	9	11	6	0.442308	37.4444	50.0909	53.1667	6.2168	10.5156	7.69267
7	158083852	rs11767201	ALC:ATF/SPB/LM:VERS/R	8.20098	6.2954e-09	229.476	1.7819e-07	1.21238	131	57	4	0.169271	91.7237	105.149	326.75	1.35326	1.19231	1.66887
7	158083852	rs11767201	ALC:ATF/SPB/LM:VERS/CD	7.52553	2.98173e-08	39.183	5.79335e-07	0.351261	131	57	4	0.169271	91.7237	105.149	326.75	1.35326	1.19231	1.66887
7	158083852	rs11767201	ALC:ATF/SPB/GLM:VERS/R	6.74912	6.2954e-09	229.476	1.7819e-07	1.21238	131	57	4	0.169271	91.7237	105.149	326.75	1.35326	1.19231	1.66887
7	158083852	rs11767201	ALC:ATF/SPB:M/GLM:VERS/R	6.28115	4.43539e-08	223.196	5.23421e-07	1.15063	114	48	4	0.168675	95.6605	111.7	326.75	1.3558	1.20261	1.66887
7	158083852	rs11767201	ALC:ATF/SPB/GLM:VERS/CD	6.23707	2.98173e-08	39.183	5.79335e-07	0.351261	131	57	4	0.169271	91.7237	105.149	326.75	1.35326	1.19231	1.66887
7	158083852	rs11767201	ALC:ATF/SPB:M/GLM:VERS/CD	5.79138	1.98942e-07	42.8717	1.61667e-06	0.359977	114	48	4	0.168675	95.6605	111.7	326.75	1.3558	1.20261	1.66887
5	39249104	rs835194	ALC:PACS/SPB/LM/CD	6.85384	1.4001e-07	9.48925	8.32639e-06	1.30912	186	6	0	0.015625	3.51075	13	NA	0.91686	1.17696	NA
5	39249104	rs835194	ALC:PACS/SPB/LM/D	6.85384	1.4001e-07	9.48925	8.32639e-06	1.30912	186	6	0	0.015625	3.51075	13	NA	0.91686	1.17696	NA
5	39249104	rs835194	ALC:PACS/SPB/LM/A	6.56641	2.71389e-07	9.33862	3.17447e-05	1.26711	186	6	0	0.015625	3.51075	13	NA	0.91686	1.17696	NA
5	39249104	rs835194	ALC:PACS/SPB:M/GLM/CD	6.02936	6.50182e-09	11.0087	9.34638e-07	1.44601	161	5	0	0.0150602	3.3913	14.4	NA	0.954836	1.2267	NA
5	39249104	rs835194	ALC:PACS/SPB:M/GLM/D	6.02936	6.50182e-09	11.0087	9.34638e-07	1.44601	161	5	0	0.0150602	3.3913	14.4	NA	0.954836	1.2267	NA
17	32018565	rs117069613	ALC:ATF/SPB/LM:VERS/CD	8.17529	6.67904e-09	88.9831	5.4562e-06	0.600746	176	15	1	0.0442708	94.1068	146.233	560	1.32924	1.12394	NA
17	32018565	rs117069613	ALC:ATF/SPB/LM:VERS/R	7.58999	2.57047e-08	439.326	6.23338e-05	1.53484	176	15	1	0.0442708	94.1068	146.233	560	1.32924	1.12394	NA
17	32018565	rs117069613	ALC:ATF/SPB/LM:VERS/A	5.83616	1.45828e-06	95.7585	1.88332e-06	0.677094	176	15	1	0.0442708	94.1068	146.233	560	1.32924	1.12394	NA
17	32018565	rs117069613	ALC:ATF/SPB/GLM:VERS/A	5.72508	1.45828e-06	95.7585	1.88332e-06	0.677094	176	15	1	0.0442708	94.1068	146.233	560	1.32924	1.12394	NA
17	32018565	rs117069613	ALC:ATF/SPB:M/GLM:VERS/A	5.55067	2.97674e-06	98.79	2.81404e-06	0.668322	151	14	1	0.0481928	98.5854	151.964	560	1.33534	1.14224	NA
12	20184267	rs4762748	ALC:VAS/SPB/LM/R	6.6843	2.06873e-07	4.02151	2.76553e-05	1.31372	138	48	4	0.147368	1.42029	1.64583	5.5	1.01619	1.05227	1.90526
12	20184267	rs4762748	ALC:VAS/SPB/LM/CD	6.02024	9.54464e-07	0.746676	9.88035e-05	0.415252	138	48	4	0.147368	1.42029	1.64583	5.5	1.01619	1.05227	1.90526
12	20184267	rs4762748	ALC:PACS/SPB/LM/R	5.89643	1.26933e-06	10.6909	0.000136131	1.38724	138	48	4	0.147368	3.28261	4.35417	14.25	0.796324	1.05474	1.80611
12	20184267	rs4762748	ALC:PACS/SPB/LM/CD	5.58024	2.6288e-06	2.33887	0.000235671	0.519715	138	48	4	0.147368	3.28261	4.35417	14.25	0.796324	1.05474	1.80611
2	25753328	rs35914997	ALC:ATF/SPB/LM:VERS/R	8.15924	6.93049e-09	442.511	3.29882e-05	1.5616	180	10	1	0.0314136	98.4523	63.387	560	1.28914	3.05823	NA
2	25753328	rs35914997	ALC:ATF/SPB/LM:VERS/CD	7.58285	2.61304e-08	44.6742	6.09067e-05	0.352754	180	10	1	0.0314136	98.4523	63.387	560	1.28914	3.05823	NA
2	53934226	rs10208649	ALC:ATF/SPB/LM:VERS/R	8.15924	6.93049e-09	442.511	3.29882e-05	1.5616	168	22	1	0.0628272	95.4642	105.332	560	1.28469	1.31141	NA
2	53934226	rs10208649	ALC:ATF/SPB/LM:VERS/CD	7.42988	3.71636e-08	48.4612	0.000113757	0.400915	168	22	1	0.0628272	95.4642	105.332	560	1.28469	1.31141	NA
3	192451152	rs62294930	ALC:ATF/SPB/LM:VERS/R	8.15924	6.93049e-09	442.511	3.29882e-05	1.5616	182	8	1	0.026178	98.1021	62.5875	560	1.29488	1.58185	NA
3	192451152	rs62294930	ALC:ATF/SPB/LM:VERS/CD	7.58937	2.57414e-08	53.6379	6.21172e-05	0.393694	182	8	1	0.026178	98.1021	62.5875	560	1.29488	1.58185	NA
5	30563907	rs72758408	ALC:ATF/SPB/LM:VERS/R	8.15924	6.93049e-09	442.511	3.29882e-05	1.5616	172	18	1	0.052356	96.6191	96.4889	560	1.2652	1.59425	NA
5	30563907	rs72758408	ALC:ATF/SPB/LM:VERS/CD	7.26677	5.41046e-08	42.5353	0.000189535	0.346606	172	18	1	0.052356	96.6191	96.4889	560	1.2652	1.59425	NA
12	66776205	rs12581619	ALC:ATF/SPB/LM:VERS/R	8.15924	6.93049e-09	442.511	3.29882e-05	1.5616	166	24	1	0.0680628	98.9674	80.2792	560	1.30908	1.16538	NA
12	66776205	rs12581619	ALC:ATF/SPB/LM:VERS/CD	7.45558	3.50284e-08	21.3127	0.000107677	0.195594	166	24	1	0.0680628	98.9674	80.2792	560	1.30908	1.16538	NA
8	1467579	rs11987128	ALC:ATF/SPB:M/GLM:VERS/CD	6.6495	7.06821e-09	1.76933	2.24132e-07	0.0162313	110	54	2	0.174699	107.907	89.65	431.5	1.25366	1.37789	2.37445
8	1467579	rs11987128	ALC:ATF/SPB:M/GLM:VERS/R	5.89521	1.07033e-08	326.485	1.27288e-06	1.41425	110	54	2	0.174699	107.907	89.65	431.5	1.25366	1.37789	2.37445
4	109066132	rs1895742	ALC:ATF/SPB:M/GLM:VERS/R	6.81283	7.38998e-09	193.424	1.53877e-07	1.01913	105	55	6	0.201807	94.9629	105.105	303.667	1.3622	1.18371	2.01788
4	109066132	rs1895742	ALC:ATF/SPB:M/GLM:VERS/CD	6.42077	2.99515e-08	45.8568	3.79518e-07	0.37894	105	55	6	0.201807	94.9629	105.105	303.667	1.3622	1.18371	2.01788
4	109066132	rs1895742	ALC:ATF/SPB/LM:VERS/R	5.88044	1.31692e-06	138.715	4.61862e-06	0.864498	124	60	8	0.197917	89.7258	104.463	240.312	1.3576	1.20293	1.38773
4	109066132	rs1895742	ALC:ATF/SPB/LM:VERS/CD	5.59494	2.5413e-06	41.1092	4.59344e-06	0.35922	124	60	8	0.197917	89.7258	104.463	240.312	1.3576	1.20293	1.38773
4	109066132	rs1895742	ALC:ATF/SPB/GLM:VERS/CD	5.33786	2.5413e-06	41.1092	4.59344e-06	0.35922	124	60	8	0.197917	89.7258	104.463	240.312	1.3576	1.20293	1.38773
4	109066132	rs1895742	ALC:ATF/SPB/GLM:VERS/R	5.33549	1.31692e-06	138.715	4.61862e-06	0.864498	124	60	8	0.197917	89.7258	104.463	240.312	1.3576	1.20293	1.38773
18	47874950	rs79022096	ALC:ATF/SPB/LM:VERS/R	8.12019	7.58253e-09	442.511	3.46823e-05	1.5616	180	9	1	0.0289474	95.9522	110.433	560	1.28797	1.23257	NA
18	47874950	rs79022096	ALC:ATF/SPB/LM:VERS/CD	7.36798	4.2857e-08	83.3742	0.000123223	0.558232	180	9	1	0.0289474	95.9522	110.433	560	1.28797	1.23257	NA
9	91430200	rs116970778	ALC:ATF/SPB/LM:VERS/CD	8.09642	8.0091e-09	113.504	7.48575e-06	0.663889	182	9	1	0.0286458	94.984	163.244	560	1.3772	0.922037	NA
9	91430200	rs116970778	ALC:ATF/SPB/LM:VERS/R	7.58999	2.57047e-08	439.326	6.23338e-05	1.53484	182	9	1	0.0286458	94.984	163.244	560	1.3772	0.922037	NA
9	91430200	rs116970778	ALC:ATF/SPB/LM:VERS/A	7.07811	8.35384e-08	131.083	4.36534e-07	0.816348	182	9	1	0.0286458	94.984	163.244	560	1.3772	0.922037	NA
9	91430200	rs116970778	ALC:ATF/SPB:M/GLM:VERS/A	6.72549	3.56716e-08	145.249	1.88152e-07	0.844898	157	8	1	0.0301205	99.2464	179.025	560	1.3834	0.981605	NA
9	91430200	rs116970778	ALC:ATF/SPB/GLM:VERS/A	6.35998	8.35384e-08	131.083	4.36534e-07	0.816348	182	9	1	0.0286458	94.984	163.244	560	1.3772	0.922037	NA
6	152244762	rs3888239	ALC:OCSD/SPB:F/GLM/D	8.06226	7.48386e-05	18.7712	8.66448e-09	1.9507	9	16	1	0.346154	3.11111	20.9375	37	0.923007	1.88281	NA
6	152244762	rs3888239	ALC:OCSD/SPB:F/GLM/CD	7.71169	0.000121328	17.5204	1.94226e-08	1.1811	9	16	1	0.346154	3.11111	20.9375	37	0.923007	1.88281	NA
12	120737875	rs1800556	ALC:PACS/SPB:M/GLM/CD	6.97683	8.93423e-09	7.50147	1.0548e-07	1.20161	155	11	0	0.0331325	3.22581	10.7273	NA	0.959924	1.17031	NA
12	120737875	rs1800556	ALC:PACS/SPB:M/GLM/D	6.97683	8.93423e-09	7.50147	1.0548e-07	1.20161	155	11	0	0.0331325	3.22581	10.7273	NA	0.959924	1.17031	NA
12	120737875	rs1800556	ALC:PACS/SPB/LM/CD	6.10874	7.7851e-07	6.42778	6.19894e-06	1.06037	180	12	0	0.03125	3.40556	9.83333	NA	0.923272	1.06054	NA
12	120737875	rs1800556	ALC:PACS/SPB/LM/D	6.10874	7.7851e-07	6.42778	6.19894e-06	1.06037	180	12	0	0.03125	3.40556	9.83333	NA	0.923272	1.06054	NA
12	120737875	rs1800556	ALC:PACS/SPB/LM/A	5.78807	1.62902e-06	6.22043	3.26949e-05	1.00127	180	12	0	0.03125	3.40556	9.83333	NA	0.923272	1.06054	NA
12	120737875	rs1800556	ALC:PACS/SPB:M/GLM/A	5.63511	3.3473e-08	7.24441	2.31683e-06	1.12493	155	11	0	0.0331325	3.22581	10.7273	NA	0.959924	1.17031	NA
12	65720850	rs11175885	ALC:ATF/SPB/LM:VERS/CD	8.03646	9.19472e-09	-9.39315	3.24717e-06	-0.0933234	143	46	1	0.126316	106.117	75.2087	560	1.2415	1.82821	NA
12	65720850	rs11175885	ALC:ATF/SPB/LM:VERS/R	7.53076	2.94604e-08	437.954	6.58218e-05	1.52354	143	46	1	0.126316	106.117	75.2087	560	1.2415	1.82821	NA
12	65720850	rs11175885	ALC:ATF/SPB:M/GLM:VERS/CD	5.49573	3.13591e-08	-11.6937	3.19352e-06	-0.109985	126	38	1	0.121212	111.468	75.6816	560	1.26138	1.73332	NA
12	65720850	rs11175885	ALC:ATF/SPB/GLM:VERS/CD	5.4885	9.19472e-09	-9.39315	3.24717e-06	-0.0933234	143	46	1	0.126316	106.117	75.2087	560	1.2415	1.82821	NA
5	23685441	rs7713783	ALC:ATF/SPB/LM:VERS/A	8.03364	9.25473e-09	188.909	1.50299e-06	0.979713	186	4	1	0.0157068	95.7865	274.25	360	1.24518	1.75144	NA
5	23685441	rs7713783	ALC:ATF/SPB/LM:VERS/D	6.31988	4.78762e-07	181.372	1.52317e-05	0.977525	186	4	1	0.0157068	95.7865	274.25	360	1.24518	1.75144	NA
5	23685441	rs7713783	ALC:ATF/SPB/GLM:VERS/A	5.82305	9.25473e-09	188.909	1.50299e-06	0.979713	186	4	1	0.0157068	95.7865	274.25	360	1.24518	1.75144	NA
5	23685441	rs7713783	ALC:ATF/SPB/LM:VERS/CD	5.65862	2.19474e-06	143.462	8.37644e-05	0.694108	186	4	1	0.0157068	95.7865	274.25	360	1.24518	1.75144	NA
12	120833903	rs12816397	ALC:PACS/SPB:M/GLM/CD	6.95802	9.31295e-09	7.52466	1.10149e-07	1.20882	153	11	0	0.0335366	3.20261	10.7273	NA	0.950752	1.17031	NA
12	120833903	rs12816397	ALC:PACS/SPB:M/GLM/D	6.95802	9.31295e-09	7.52466	1.10149e-07	1.20882	153	11	0	0.0335366	3.20261	10.7273	NA	0.950752	1.17031	NA
12	120833903	rs12816397	ALC:PACS/SPB:M/GLM/A	5.60976	3.52867e-08	7.26355	2.45606e-06	1.13045	153	11	0	0.0335366	3.20261	10.7273	NA	0.950752	1.17031	NA
9	18652067	rs59589985	ALC:ATF/SPB:F/GLM:VERS/CD	8.02762	2.61372e-06	89.0833	9.38374e-09	1.07131	22	4	0	0.0769231	54.5636	135.5	NA	2.34013	3.44059	NA
9	18652067	rs59589985	ALC:ATF/SPB:F/GLM:VERS/D	8.02762	2.61372e-06	89.0833	9.38374e-09	1.07131	22	4	0	0.0769231	54.5636	135.5	NA	2.34013	3.44059	NA
4	88249578	rs17013965	ALC:OCSD/SPB:F/GLM/D	8.02479	4.85802e-05	19.6944	9.44527e-09	2.50585	8	16	2	0.384615	1.75	21.4375	21.5	0.506692	1.87065	2.76414
4	88249578	rs17013965	ALC:OCSD/SPB:F/GLM/CD	6.85628	0.000314648	14.0804	1.39226e-07	0.91065	8	16	2	0.384615	1.75	21.4375	21.5	0.506692	1.87065	2.76414
1	187826196	rs116230412	ALC:ATF/SPB/LM:VERS/R	8.02119	9.52377e-09	319.265	1.87234e-06	1.44353	150	40	2	0.114583	92.7126	114.335	418	1.25236	1.29837	2.57018
1	187826196	rs116230412	ALC:ATF/SPB/LM:VERS/CD	7.6866	2.05776e-08	47.5062	2.45302e-06	0.406879	150	40	2	0.114583	92.7126	114.335	418	1.25236	1.29837	2.57018
1	187826196	rs116230412	ALC:ATF/SPB:M/GLM:VERS/CD	5.77403	4.36244e-08	57.0391	1.68256e-06	0.45599	129	35	2	0.11747	95.9185	124.697	418	1.23326	1.397	2.57018
1	187826196	rs116230412	ALC:ATF/SPB/GLM:VERS/R	5.72762	9.52377e-09	319.265	1.87234e-06	1.44353	150	40	2	0.114583	92.7126	114.335	418	1.25236	1.29837	2.57018
1	187826196	rs116230412	ALC:ATF/SPB/GLM:VERS/CD	5.6103	2.05776e-08	47.5062	2.45302e-06	0.406879	150	40	2	0.114583	92.7126	114.335	418	1.25236	1.29837	2.57018
1	187826196	rs116230412	ALC:ATF/SPB:M/GLM:VERS/R	5.43698	4.87502e-08	312.818	3.65611e-06	1.38083	129	35	2	0.11747	95.9185	124.697	418	1.23326	1.397	2.57018
7	8897033	rs79716256	ALC:ATF/SPB/LM:VERS/CD	8.01736	9.6081e-09	93.7911	1.28048e-05	0.598401	177	13	1	0.039267	94.4587	154.238	560	1.3117	1.22155	NA
7	8897033	rs79716256	ALC:ATF/SPB/LM:VERS/R	7.57076	2.68685e-08	438.318	6.29526e-05	1.52653	177	13	1	0.039267	94.4587	154.238	560	1.3117	1.22155	NA
7	8897033	rs79716256	ALC:ATF/SPB/LM:VERS/A	5.89254	1.28073e-06	102.411	4.06922e-06	0.679335	177	13	1	0.039267	94.4587	154.238	560	1.3117	1.22155	NA
7	8897033	rs79716256	ALC:ATF/SPB/GLM:VERS/A	5.39049	1.28073e-06	102.411	4.06922e-06	0.679335	177	13	1	0.039267	94.4587	154.238	560	1.3117	1.22155	NA
19	53272597	rs56367861	ALC:ATF/SPB:M/GLM:VERS/R	6.69595	1.1023e-08	232.114	2.01395e-07	1.17907	94	68	4	0.228916	103.414	95.7532	335.45	1.19013	1.4969	1.86568
19	53272597	rs56367861	ALC:ATF/SPB:M/GLM:VERS/CD	6.25797	4.76325e-08	18.6745	5.52113e-07	0.170648	94	68	4	0.228916	103.414	95.7532	335.45	1.19013	1.4969	1.86568
6	5750632	rs55827003	ALC:PACS/SPB/LM/CD	6.45724	3.4895e-07	10.0545	3.72623e-05	1.3444	187	5	0	0.0130208	3.54545	13.6	NA	0.878087	1.51768	NA
6	5750632	rs55827003	ALC:PACS/SPB/LM/D	6.45724	3.4895e-07	10.0545	3.72623e-05	1.3444	187	5	0	0.0130208	3.54545	13.6	NA	0.878087	1.51768	NA
6	5750632	rs55827003	ALC:PACS/SPB/LM/A	6.21692	6.06847e-07	9.9219	8.25924e-05	1.30767	187	5	0	0.0130208	3.54545	13.6	NA	0.878087	1.51768	NA
6	65468587	rs4710520	ALC:PACS/SPB/LM/R	7.29336	5.08909e-08	13.7407	3.31922e-05	1.57376	150	39	3	0.117188	3.53333	3.82051	17.3333	0.839201	1.12823	1.69696
6	65468587	rs4710520	ALC:PACS/SPB/LM/CD	6.46011	3.46652e-07	2.01893	0.000184096	0.44558	150	39	3	0.117188	3.53333	3.82051	17.3333	0.839201	1.12823	1.69696
11	7642495	rs4402283	ALC:ATF/SPB/LM:VERS/R	7.86394	1.3679e-08	261.149	5.05824e-06	1.174	138	51	3	0.148438	93.0225	104.808	378	1.24785	1.38299	1.94322
11	7642495	rs4402283	ALC:ATF/SPB/LM:VERS/CD	7.10206	7.90573e-08	35.8423	2.21438e-05	0.308595	138	51	3	0.148438	93.0225	104.808	378	1.24785	1.38299	1.94322
3	66585449	rs4856952	ALC:PACS/SPB:M/GLM/CD	5.74368	2.46485e-08	0.884737	1.80433e-06	0.223665	103	57	5	0.20303	3.82524	2.68421	14.2	0.952567	0.920371	1.40121
3	66585449	rs4856952	ALC:PACS/SPB:M/GLM/R	5.55669	1.45722e-08	10.7812	2.77532e-06	1.42397	103	57	5	0.20303	3.82524	2.68421	14.2	0.952567	0.920371	1.40121
16	26621841	rs75691023	ALC:ATF/SPB/LM:VERS/CD	7.83203	1.4722e-08	84.3361	2.07701e-05	0.560141	176	15	1	0.0442708	93.9198	148.427	560	1.30383	1.23392	NA
16	26621841	rs75691023	ALC:ATF/SPB/LM:VERS/R	7.58999	2.57047e-08	439.326	6.23338e-05	1.53484	176	15	1	0.0442708	93.9198	148.427	560	1.30383	1.23392	NA
8	94487067	rs3098726	ALC:ATF/SPB/LM:VERS/R	7.80155	1.57924e-08	441.372	5.01901e-05	1.55195	164	23	1	0.0664894	93.7195	119.795	560	1.21065	1.75157	NA
8	94487067	rs3098726	ALC:ATF/SPB/LM:VERS/CD	7.42667	3.74396e-08	56.1023	8.41505e-05	0.442552	164	23	1	0.0664894	93.7195	119.795	560	1.21065	1.75157	NA
14	36406707	rs7158323	ALC:ATF/SPB/LM:VERS/R	7.78462	1.64201e-08	315.747	1.38706e-05	1.3064	145	44	2	0.125654	98.2259	90.3302	433	1.39215	0.972811	2.41084
14	36406707	rs7158323	ALC:ATF/SPB/LM:VERS/CD	7.03145	9.30151e-08	18.7716	6.33436e-05	0.16992	145	44	2	0.125654	98.2259	90.3302	433	1.39215	0.972811	2.41084
8	95888394	rs2873957	ALC:ATF/SPB:F/GLM:VERS/CD	7.76889	3.96917e-06	13.1296	1.7026e-08	0.187461	14	10	2	0.269231	70.9929	41.95	164.5	2.68527	2.41319	5.41019
8	95888394	rs2873957	ALC:VAS/SPB:F/GLM/CD	5.92572	1.71177e-05	0.669118	1.18652e-06	0.312259	14	10	2	0.269231	2.14286	0.9	6.5	1.58657	1.21974	3.06413
5	175538971	rs2662176	ALC:TAI/SPB:F/GLM/D	7.76641	1.42548e-05	-15.0667	1.71235e-08	-0.359446	20	5	1	0.134615	49.9	33.6	41	8.04046	7.64822	NA
5	175538971	rs2662176	ALC:TAI/SPB:F/GLM/CD	7.46507	5.36511e-05	-10.5351	3.4271e-08	-0.256182	20	5	1	0.134615	49.9	33.6	41	8.04046	7.64822	NA
3	176327948	rs2220099	ALC:TAI/SPB:F/GLM/D	7.76641	1.42548e-05	15.0667	1.71235e-08	0.359446	6	18	2	0.423077	34.8333	49.2222	56	7.02784	8.44804	6.59966
3	176327948	rs2220099	ALC:TAI/SPB:F/GLM/CD	7.76236	3.12903e-05	12.0104	1.72837e-08	0.2608	6	18	2	0.423077	34.8333	49.2222	56	7.02784	8.44804	6.59966
14	99281620	rs8008354	ALC:SAI/SPB:M/GLM/R	7.75876	4.29529e-08	11.3256	1.74276e-08	0.257356	77	66	23	0.337349	38.5195	38.6667	49.913	4.47811	5.19087	4.02459
14	99281620	rs8008354	ALC:SAI/SPB:M/GLM/CD	6.85624	3.17122e-07	4.25139	1.39237e-07	0.10385	77	66	23	0.337349	38.5195	38.6667	49.913	4.47811	5.19087	4.02459
14	99281620	rs8008354	ALC:SAI/SPB/GLM/R	6.50088	5.20073e-07	9.47138	3.15584e-07	0.21848	86	79	27	0.346354	38.6977	38.8861	48.2593	4.5929	5.02341	3.92369
14	99281620	rs8008354	ALC:SAI/SPB/LM/R	6.28394	5.20073e-07	9.47138	3.15584e-07	0.21848	86	79	27	0.346354	38.6977	38.8861	48.2593	4.5929	5.02341	3.92369
14	99281620	rs8008354	ALC:SAI/SPB/GLM/CD	5.65292	3.47559e-06	3.60565	2.22369e-06	0.0885193	86	79	27	0.346354	38.6977	38.8861	48.2593	4.5929	5.02341	3.92369
14	99281620	rs8008354	ALC:SAI/SPB/LM/CD	5.45897	3.47559e-06	3.60565	2.22369e-06	0.0885193	86	79	27	0.346354	38.6977	38.8861	48.2593	4.5929	5.02341	3.92369
21	35168573	rs9984209	ALC:ATF/SPB/LM:VERS/A	7.74039	1.81807e-08	171.109	3.16587e-07	0.985182	186	5	1	0.0182292	96.5768	158.6	560	1.29276	1.00066	NA
21	35168573	rs9984209	ALC:ATF/SPB/LM:VERS/R	7.58999	2.57047e-08	439.326	6.23338e-05	1.53484	186	5	1	0.0182292	96.5768	158.6	560	1.29276	1.00066	NA
21	35168573	rs9984209	ALC:ATF/SPB/LM:VERS/CD	7.50669	3.1139e-08	134.532	4.39362e-05	0.703545	186	5	1	0.0182292	96.5768	158.6	560	1.29276	1.00066	NA
21	35168573	rs9984209	ALC:ATF/SPB/GLM:VERS/A	6.49951	1.81807e-08	171.109	3.16587e-07	0.985182	186	5	1	0.0182292	96.5768	158.6	560	1.29276	1.00066	NA
21	35168573	rs9984209	ALC:ATF/SPB:M/GLM:VERS/A	5.82219	1.81684e-07	163.843	1.50595e-06	0.917119	160	5	1	0.0210843	101.381	158.6	560	1.29944	1.00066	NA
13	112974891	rs72661947	ALC:PACS/SPB/LM/A	7.20533	6.23266e-08	10.7325	1.89885e-05	1.36771	188	3	1	0.0130208	3.6383	7.33333	25	0.882916	0.77588	NA
13	112974891	rs72661947	ALC:PACS/SPB/LM/R	5.94059	1.14659e-06	21.3037	0.000999741	1.91153	188	3	1	0.0130208	3.6383	7.33333	25	0.882916	0.77588	NA
13	112974891	rs72661947	ALC:PACS/SPB/LM/CD	5.61541	2.42432e-06	7.70963	0.00164937	0.912063	188	3	1	0.0130208	3.6383	7.33333	25	0.882916	0.77588	NA
19	47061334	rs73059368	ALC:ATF/SPB/GLM:VERS/D	7.72003	1.35074e-06	-56.8463	1.90534e-08	-0.542579	74	88	30	0.385417	136.924	78.1412	76.9157	1.2014	1.70563	1.52097
19	47061334	rs73059368	ALC:ATF/SPB/GLM:VERS/CD	6.85929	8.25772e-06	-33.2973	1.38265e-07	-0.356956	74	88	30	0.385417	136.924	78.1412	76.9157	1.2014	1.70563	1.52097
19	47061334	rs73059368	ALC:ATF/SPB:M/GLM:VERS/D	6.69884	9.07336e-06	-57.5483	2.00059e-07	-0.529236	68	69	29	0.38253	142.69	81.1381	78.361	1.22839	1.67821	1.5416
19	47061334	rs73059368	ALC:ATF/SPB/LM:VERS/D	5.86943	1.35074e-06	-56.8463	1.90534e-08	-0.542579	74	88	30	0.385417	136.924	78.1412	76.9157	1.2014	1.70563	1.52097
19	47061334	rs73059368	ALC:ATF/SPB:M/GLM:VERS/CD	5.84912	5.26769e-05	-33.118	1.41539e-06	-0.340557	68	69	29	0.38253	142.69	81.1381	78.361	1.22839	1.67821	1.5416
19	47061334	rs73059368	ALC:ATF/SPB/GLM:VERS/A	5.38439	5.17103e-05	-34.2291	4.12677e-06	-0.361573	74	88	30	0.385417	136.924	78.1412	76.9157	1.2014	1.70563	1.52097
22	25450316	rs76280871	ALC:PACS/SPB:M/GLM/CD	6.14575	1.95391e-08	9.08895	7.14909e-07	1.31414	159	7	0	0.0210843	3.33962	12.4286	NA	0.958106	1.16429	NA
22	25450316	rs76280871	ALC:PACS/SPB:M/GLM/D	6.14575	1.95391e-08	9.08895	7.14909e-07	1.31414	159	7	0	0.0210843	3.33962	12.4286	NA	0.958106	1.16429	NA
22	25453730	rs75170820	ALC:PACS/SPB:M/GLM/CD	6.14575	1.95391e-08	9.08895	7.14909e-07	1.31414	159	7	0	0.0210843	3.33962	12.4286	NA	0.958106	1.16429	NA
22	25453730	rs75170820	ALC:PACS/SPB:M/GLM/D	6.14575	1.95391e-08	9.08895	7.14909e-07	1.31414	159	7	0	0.0210843	3.33962	12.4286	NA	0.958106	1.16429	NA
19	8959216	rs1862460	ALC:ATF/SPB:F/GLM:VERS/A	7.70181	1.27246e-06	54.7068	1.98696e-08	0.721634	16	6	4	0.269231	50.0875	66.5	135.5	2.44249	2.37092	3.44059
19	8959216	rs1862460	ALC:ATF/SPB:F/GLM:VERS/CD	6.5261	2.59308e-05	39.4768	2.97783e-07	0.507193	16	6	4	0.269231	50.0875	66.5	135.5	2.44249	2.37092	3.44059
19	8959216	rs1862460	ALC:ATF/SPB:F/GLM:VERS/R	6.35109	9.85331e-06	81.3775	4.45566e-07	0.916448	16	6	4	0.269231	50.0875	66.5	135.5	2.44249	2.37092	3.44059
19	8972781	rs17000886	ALC:ATF/SPB:F/GLM:VERS/A	7.70181	1.27246e-06	54.7068	1.98696e-08	0.721634	16	6	4	0.269231	50.0875	66.5	135.5	2.44249	2.37092	3.44059
19	8972781	rs17000886	ALC:ATF/SPB:F/GLM:VERS/CD	6.5261	2.59308e-05	39.4768	2.97783e-07	0.507193	16	6	4	0.269231	50.0875	66.5	135.5	2.44249	2.37092	3.44059
19	8972781	rs17000886	ALC:ATF/SPB:F/GLM:VERS/R	6.35109	9.85331e-06	81.3775	4.45566e-07	0.916448	16	6	4	0.269231	50.0875	66.5	135.5	2.44249	2.37092	3.44059
19	8988584	rs10421224	ALC:ATF/SPB:F/GLM:VERS/A	7.70181	1.27246e-06	54.7068	1.98696e-08	0.721634	16	6	4	0.269231	50.0875	66.5	135.5	2.44249	2.37092	3.44059
19	8988584	rs10421224	ALC:ATF/SPB:F/GLM:VERS/CD	6.5261	2.59308e-05	39.4768	2.97783e-07	0.507193	16	6	4	0.269231	50.0875	66.5	135.5	2.44249	2.37092	3.44059
19	8988584	rs10421224	ALC:ATF/SPB:F/GLM:VERS/R	6.35109	9.85331e-06	81.3775	4.45566e-07	0.916448	16	6	4	0.269231	50.0875	66.5	135.5	2.44249	2.37092	3.44059
8	26729595	rs61148644	ALC:ATF/SPB/LM:VERS/CD	7.69505	2.01811e-08	5.94819	1.16516e-05	0.0552765	170	21	1	0.0598958	102.194	65.8714	560	1.25892	2.54414	NA
8	26729595	rs61148644	ALC:ATF/SPB/LM:VERS/R	7.58999	2.57047e-08	439.326	6.23338e-05	1.53484	170	21	1	0.0598958	102.194	65.8714	560	1.25892	2.54414	NA
6	81000336	rs7751304	ALC:ATF/SPB/LM:VERS/R	7.6933	2.02627e-08	248.973	1.85604e-06	1.22946	136	52	3	0.151832	95.1713	94.5229	352.267	1.51557	1.02392	1.49735
6	81000336	rs7751304	ALC:ATF/SPB/LM:VERS/CD	6.82649	1.49111e-07	24.9867	1.25393e-05	0.230542	136	52	3	0.151832	95.1713	94.5229	352.267	1.51557	1.02392	1.49735
6	81000336	rs7751304	ALC:ATF/SPB/GLM:VERS/R	5.73141	2.02627e-08	248.973	1.85604e-06	1.22946	136	52	3	0.151832	95.1713	94.5229	352.267	1.51557	1.02392	1.49735
6	21824250	rs2475883	ALC:ATF/SPB:F/GLM:VERS/A	7.69147	7.12258e-08	90.2074	2.03485e-08	0.975455	23	1	2	0.0961538	58.5826	66	164.5	2.12795	NA	5.41019
6	21824250	rs2475883	ALC:VAS/SPB:F/GLM/A	5.58757	1.60138e-06	3.7617	2.58483e-06	1.19274	23	1	2	0.0961538	1.65217	1	6.5	1.27026	NA	3.06413
5	76505758	rs10054825	ALC:ATF/SPB:F/GLM:VERS/D	7.67247	6.00374e-06	70.3413	2.12585e-08	0.869024	20	5	1	0.134615	50.77	116.8	143	2.49201	2.81002	NA
5	76505758	rs10054825	ALC:ATF/SPB:F/GLM:VERS/CD	6.67686	3.00516e-05	56.5375	2.10444e-07	0.637324	20	5	1	0.134615	50.77	116.8	143	2.49201	2.81002	NA
9	3584543	rs1001389	ALC:PACS/SPB:F/GLM/D	7.67082	3.70365e-06	-8.90977	2.13391e-08	-1.71834	7	15	4	0.442308	10.8571	1.93333	2	1.93519	0.926709	0.707107
9	3584543	rs1001389	ALC:PACS/SPB:F/GLM/CD	6.53948	2.8662e-05	-5.15884	2.88749e-07	-1.34472	7	15	4	0.442308	10.8571	1.93333	2	1.93519	0.926709	0.707107
17	11769878	rs8080946	ALC:TAI/SPB:F/GLM/A	7.64637	1.25077e-06	-12.8736	2.25753e-08	-0.303736	19	3	4	0.211538	49.6842	42.3333	34	8.24197	3.42993	6.84579
17	11769878	rs8080946	ALC:SAI/SPB:F/GLM/A	5.93348	1.83982e-05	-10.5765	1.16552e-06	-0.28914	19	3	4	0.211538	42.8947	32.3333	31.25	6.80217	7.76622	4.09451
6	16899212	rs4145201	ALC:ATF/SPB:F/GLM:VERS/R	7.64483	1.77896e-06	85.2727	2.26555e-08	0.951895	11	11	4	0.365385	57.1727	50.7727	138.75	1.96022	4.13366	3.96442
6	16899212	rs4145201	ALC:ATF/SPB:F/GLM:VERS/CD	6.97637	1.19908e-05	30.0664	1.05593e-07	0.426664	11	11	4	0.365385	57.1727	50.7727	138.75	1.96022	4.13366	3.96442
2	58661425	rs6719595	ALC:ATF/SPB/LM:VERS/CD	7.64403	2.26969e-08	14.5967	1.51216e-05	0.126404	176	15	1	0.0442708	101.23	62.6533	560	1.27367	1.46324	NA
2	58661425	rs6719595	ALC:ATF/SPB/LM:VERS/R	7.58999	2.57047e-08	439.326	6.23338e-05	1.53484	176	15	1	0.0442708	101.23	62.6533	560	1.27367	1.46324	NA
15	94649156	rs6496029	ALC:ATF/SPB/LM:VERS/R	7.64227	2.27895e-08	440.432	5.95908e-05	1.54405	171	19	1	0.0549738	99.4908	80.2826	560	1.25176	1.42609	NA
15	94649156	rs6496029	ALC:ATF/SPB/LM:VERS/CD	6.96241	1.09041e-07	25.8916	0.000172191	0.224863	171	19	1	0.0549738	99.4908	80.2826	560	1.25176	1.42609	NA
21	39917404	rs80335651	ALC:ATF/SPB/LM:VERS/R	7.64227	2.27895e-08	440.432	5.95908e-05	1.54405	178	12	1	0.0366492	97.4685	99.075	560	1.24274	1.49289	NA
21	39917404	rs80335651	ALC:ATF/SPB/LM:VERS/CD	6.77127	1.6933e-07	59.2653	0.000327546	0.435784	178	12	1	0.0366492	97.4685	99.075	560	1.24274	1.49289	NA
19	11797582	rs286232	ALC:ATF/SPB/LM:VERS/CD	7.63413	2.32202e-08	53.2946	3.87808e-07	0.446553	142	47	3	0.138021	88.3337	121.53	353.667	1.3828	1.18355	1.89896
19	11797582	rs286232	ALC:ATF/SPB/LM:VERS/R	7.22326	5.98049e-08	248.255	3.87258e-06	1.21316	142	47	3	0.138021	88.3337	121.53	353.667	1.3828	1.18355	1.89896
19	11797582	rs286232	ALC:ATF/SPB/GLM:VERS/CD	6.41138	2.32202e-08	53.2946	3.87808e-07	0.446553	142	47	3	0.138021	88.3337	121.53	353.667	1.3828	1.18355	1.89896
19	11797582	rs286232	ALC:ATF/SPB:M/GLM:VERS/CD	5.61567	2.74929e-07	54.7007	2.42284e-06	0.430432	123	40	3	0.138554	92.9471	127.01	353.667	1.40102	1.16605	1.89896
19	11797582	rs286232	ALC:ATF/SPB/GLM:VERS/R	5.412	5.98049e-08	248.255	3.87258e-06	1.21316	142	47	3	0.138021	88.3337	121.53	353.667	1.3828	1.18355	1.89896
22	36205011	rs6518994	ALC:PACS/SPB/LM/R	6.90806	1.23579e-07	6.85335	1.61924e-06	1.10449	103	76	12	0.26178	3.51456	3.23684	10.25	0.875501	1.00776	1.14452
22	36205011	rs6518994	ALC:PACS/SPB:M/GLM/R	6.7336	2.44765e-08	7.01471	1.84671e-07	1.15316	87	66	12	0.272727	3.17241	3.31818	10.25	0.898375	1.0572	1.14452
22	36205011	rs6518994	ALC:PACS/SPB/LM/CD	6.09774	7.98477e-07	1.52529	8.77065e-06	0.369769	103	76	12	0.26178	3.51456	3.23684	10.25	0.875501	1.00776	1.14452
22	36205011	rs6518994	ALC:PACS/SPB:M/GLM/CD	5.86827	1.80521e-07	1.97059	1.35435e-06	0.479574	87	66	12	0.272727	3.17241	3.31818	10.25	0.898375	1.0572	1.14452
22	36205011	rs6518994	ALC:PACS/SPB/GLM/R	5.79069	1.23579e-07	6.85335	1.61924e-06	1.10449	103	76	12	0.26178	3.51456	3.23684	10.25	0.875501	1.00776	1.14452
8	71341481	rs6983443	ALC:ATF/SPB/LM:VERS/CD	7.60538	2.48094e-08	51.4893	2.3939e-05	0.433564	157	34	1	0.09375	93.8681	118.206	560	1.28643	1.23046	NA
8	71341481	rs6983443	ALC:ATF/SPB/LM:VERS/R	7.58999	2.57047e-08	439.326	6.23338e-05	1.53484	157	34	1	0.09375	93.8681	118.206	560	1.28643	1.23046	NA
13	104682890	rs59034192	ALC:ATF/SPB/LM:VERS/R	7.59738	2.52708e-08	439.326	6.14224e-05	1.53484	162	28	1	0.078534	97.0763	102.355	560	1.2564	1.23483	NA
13	104682890	rs59034192	ALC:ATF/SPB/LM:VERS/CD	6.73455	1.84268e-07	32.6513	0.000329882	0.278662	162	28	1	0.078534	97.0763	102.355	560	1.2564	1.23483	NA
16	75710233	rs80343879	ALC:ATF/SPB/LM:VERS/R	7.59738	2.52708e-08	439.326	6.14224e-05	1.53484	149	41	1	0.112565	92.453	117.483	560	1.30148	1.20478	NA
16	75710233	rs80343879	ALC:ATF/SPB/LM:VERS/CD	7.28754	5.15774e-08	41.2923	6.62177e-05	0.354475	149	41	1	0.112565	92.453	117.483	560	1.30148	1.20478	NA
12	4011511	rs11062960	ALC:ATF/SPB/LM:VERS/CD	7.59607	2.53473e-08	84.2117	2.73705e-05	0.59832	177	14	1	0.0416667	95.9971	126.057	560	1.27372	1.21366	NA
12	4011511	rs11062960	ALC:ATF/SPB/LM:VERS/R	7.58999	2.57047e-08	439.326	6.23338e-05	1.53484	177	14	1	0.0416667	95.9971	126.057	560	1.27372	1.21366	NA
12	4011511	rs11062960	ALC:ATF/SPB:M/GLM:VERS/A	5.56203	3.78945e-06	104.234	2.74136e-06	0.731656	153	12	1	0.0421687	100.18	140.525	560	1.27088	1.33665	NA
13	62823724	rs9317268	ALC:ATF/SPB:F/GLM:VERS/CD	7.59576	1.61417e-05	-8.0121	2.5365e-08	-0.120707	14	11	1	0.25	79.3857	40.4545	186	2.57642	2.98299	NA
1	17921432	rs2210811	ALC:ATF/SPB/LM:VERS/R	7.58999	2.57047e-08	439.326	6.23338e-05	1.53484	178	13	1	0.0390625	98.2881	97	560	1.2368	1.82676	NA
1	17921432	rs2210811	ALC:ATF/SPB/LM:VERS/CD	6.71768	1.91565e-07	55.1792	0.000344177	0.415792	178	13	1	0.0390625	98.2881	97	560	1.2368	1.82676	NA
1	34435737	rs16836700	ALC:ATF/SPB/LM:VERS/R	7.58999	2.57047e-08	439.326	6.23338e-05	1.53484	159	32	1	0.0885417	96.4457	106.92	560	1.33461	1.04639	NA
1	34435737	rs16836700	ALC:ATF/SPB/LM:VERS/CD	6.76769	1.70732e-07	32.8042	0.000287376	0.280097	159	32	1	0.0885417	96.4457	106.92	560	1.33461	1.04639	NA
1	38059639	rs11578167	ALC:ATF/SPB/LM:VERS/R	7.58999	2.57047e-08	439.326	6.23338e-05	1.53484	166	25	1	0.0703125	97.0584	105.784	560	1.26038	1.25111	NA
1	38059639	rs11578167	ALC:ATF/SPB/LM:VERS/CD	6.76887	1.70266e-07	39.1462	0.00029803	0.32461	166	25	1	0.0703125	97.0584	105.784	560	1.26038	1.25111	NA
1	73578022	rs12133927	ALC:ATF/SPB/LM:VERS/R	7.58999	2.57047e-08	439.326	6.23338e-05	1.53484	170	21	1	0.0598958	93.8046	133.786	560	1.29151	1.24682	NA
1	73578022	rs12133927	ALC:ATF/SPB/LM:VERS/CD	7.2229	5.98547e-08	60.3427	9.75657e-05	0.437617	170	21	1	0.0598958	93.8046	133.786	560	1.29151	1.24682	NA
1	171110939	rs1736557	ALC:ATF/SPB/LM:VERS/R	7.58999	2.57047e-08	439.326	6.23338e-05	1.53484	170	21	1	0.0598958	96.9652	108.2	560	1.32251	0.985982	NA
1	171110939	rs1736557	ALC:ATF/SPB/LM:VERS/CD	6.74311	1.8067e-07	42.0873	0.000307633	0.333575	170	21	1	0.0598958	96.9652	108.2	560	1.32251	0.985982	NA
1	193205708	rs17593064	ALC:ATF/SPB/LM:VERS/R	7.58999	2.57047e-08	439.326	6.23338e-05	1.53484	180	11	1	0.0338542	98.1399	99.1909	560	1.27161	1.07276	NA
1	193205708	rs17593064	ALC:ATF/SPB/LM:VERS/CD	6.71752	1.91637e-07	57.9402	0.000342758	0.412428	180	11	1	0.0338542	98.1399	99.1909	560	1.27161	1.07276	NA
1	193362428	rs17529137	ALC:ATF/SPB/LM:VERS/R	7.58999	2.57047e-08	439.326	6.23338e-05	1.53484	178	13	1	0.0390625	97.5348	107.315	560	1.26291	1.20725	NA
1	193362428	rs17529137	ALC:ATF/SPB/LM:VERS/CD	6.7347	1.84206e-07	58.0142	0.000327942	0.41998	178	13	1	0.0390625	97.5348	107.315	560	1.26291	1.20725	NA
1	224110436	rs4653553	ALC:ATF/SPB/LM:VERS/R	7.58999	2.57047e-08	439.326	6.23338e-05	1.53484	170	21	1	0.0598958	98.9664	92	560	1.2386	1.53498	NA
1	224110436	rs4653553	ALC:ATF/SPB/LM:VERS/CD	6.72127	1.89989e-07	34.8488	0.00033624	0.29617	170	21	1	0.0598958	98.9664	92	560	1.2386	1.53498	NA
2	3701381	rs6730148	ALC:ATF/SPB/LM:VERS/R	7.58999	2.57047e-08	439.326	6.23338e-05	1.53484	166	25	1	0.0703125	101.273	77.796	560	1.27489	1.21415	NA
2	3701381	rs6730148	ALC:ATF/SPB/LM:VERS/CD	7.12753	7.45542e-08	13.1902	9.46633e-05	0.121216	166	25	1	0.0703125	101.273	77.796	560	1.27489	1.21415	NA
2	25708708	rs114512015	ALC:ATF/SPB/LM:VERS/R	7.58999	2.57047e-08	439.326	6.23338e-05	1.53484	183	8	1	0.0260417	99.5284	67.825	560	1.257	3.29273	NA
2	25708708	rs114512015	ALC:ATF/SPB/LM:VERS/CD	6.86119	1.37662e-07	60.0588	0.000202374	0.43301	183	8	1	0.0260417	99.5284	67.825	560	1.257	3.29273	NA
2	53810148	rs6545367	ALC:ATF/SPB/LM:VERS/R	7.58999	2.57047e-08	439.326	6.23338e-05	1.53484	166	25	1	0.0703125	97.324	104.02	560	1.24086	1.38336	NA
2	53810148	rs6545367	ALC:ATF/SPB/LM:VERS/CD	6.83223	1.47152e-07	43.0264	0.000242463	0.362506	166	25	1	0.0703125	97.324	104.02	560	1.24086	1.38336	NA
2	53861798	rs73937421	ALC:ATF/SPB/LM:VERS/R	7.58999	2.57047e-08	439.326	6.23338e-05	1.53484	169	22	1	0.0625	97.2721	105.332	560	1.25147	1.31141	NA
2	53861798	rs73937421	ALC:ATF/SPB/LM:VERS/CD	6.84031	1.4444e-07	47.0873	0.0002332	0.38629	169	22	1	0.0625	97.2721	105.332	560	1.25147	1.31141	NA
2	53969672	rs7560832	ALC:ATF/SPB/LM:VERS/R	7.58999	2.57047e-08	439.326	6.23338e-05	1.53484	169	22	1	0.0625	97.6567	102.377	560	1.25795	1.25939	NA
2	53969672	rs7560832	ALC:ATF/SPB/LM:VERS/CD	6.78391	1.64473e-07	44.2572	0.000273791	0.366646	169	22	1	0.0625	97.6567	102.377	560	1.25795	1.25939	NA
2	53998444	rs11904365	ALC:ATF/SPB/LM:VERS/R	7.58999	2.57047e-08	439.326	6.23338e-05	1.53484	167	24	1	0.0677083	96.3293	111.221	560	1.26107	1.26274	NA
2	53998444	rs11904365	ALC:ATF/SPB/LM:VERS/CD	6.95527	1.10848e-07	48.302	0.000167505	0.393047	167	24	1	0.0677083	96.3293	111.221	560	1.26107	1.26274	NA
2	114166831	rs80218178	ALC:ATF/SPB/LM:VERS/R	7.58999	2.57047e-08	439.326	6.23338e-05	1.53484	185	6	1	0.0208333	98.8859	77.0667	560	1.25528	2.04639	NA
2	114166831	rs80218178	ALC:ATF/SPB/LM:VERS/CD	6.73252	1.85131e-07	84.1829	0.000322832	0.5416	185	6	1	0.0208333	98.8859	77.0667	560	1.25528	2.04639	NA
2	117409863	rs35133878	ALC:ATF/SPB/LM:VERS/R	7.58999	2.57047e-08	439.326	6.23338e-05	1.53484	173	18	1	0.0520833	98.6994	93.4056	560	1.28516	1.04141	NA
2	117409863	rs35133878	ALC:ATF/SPB/LM:VERS/CD	6.74454	1.80079e-07	35.8921	0.000321799	0.291508	173	18	1	0.0520833	98.6994	93.4056	560	1.28516	1.04141	NA
2	126171507	rs72853115	ALC:ATF/SPB/LM:VERS/R	7.58999	2.57047e-08	439.326	6.23338e-05	1.53484	180	11	1	0.0338542	96.3138	129.073	560	1.23656	1.74617	NA
2	126171507	rs72853115	ALC:ATF/SPB/LM:VERS/CD	7.15621	6.97892e-08	84.3365	0.000115428	0.557942	180	11	1	0.0338542	96.3138	129.073	560	1.23656	1.74617	NA
2	140765834	rs113443790	ALC:ATF/SPB/LM:VERS/R	7.58999	2.57047e-08	439.326	6.23338e-05	1.53484	179	12	1	0.0364583	97.6553	106.333	560	1.24594	1.47269	NA
2	140765834	rs113443790	ALC:ATF/SPB/LM:VERS/CD	6.73704	1.83214e-07	61.597	0.000326092	0.440133	179	12	1	0.0364583	97.6553	106.333	560	1.24594	1.47269	NA
2	143737613	rs74598335	ALC:ATF/SPB/LM:VERS/R	7.58999	2.57047e-08	439.326	6.23338e-05	1.53484	171	20	1	0.0572917	97.8602	101.11	560	1.32464	0.931881	NA
2	143737613	rs74598335	ALC:ATF/SPB/LM:VERS/CD	6.71538	1.92584e-07	37.6338	0.000345725	0.302867	171	20	1	0.0572917	97.8602	101.11	560	1.32464	0.931881	NA
2	143741580	rs78842721	ALC:ATF/SPB/LM:VERS/R	7.58999	2.57047e-08	439.326	6.23338e-05	1.53484	171	20	1	0.0572917	97.8602	101.11	560	1.32464	0.931881	NA
2	143741580	rs78842721	ALC:ATF/SPB/LM:VERS/CD	6.71538	1.92584e-07	37.6338	0.000345725	0.302867	171	20	1	0.0572917	97.8602	101.11	560	1.32464	0.931881	NA
2	217354793	rs76427035	ALC:ATF/SPB/LM:VERS/R	7.58999	2.57047e-08	439.326	6.23338e-05	1.53484	166	25	1	0.0703125	97.8608	100.456	560	1.32612	0.978402	NA
2	217354793	rs76427035	ALC:ATF/SPB/LM:VERS/CD	6.72738	1.87334e-07	35.6698	0.000324237	0.302049	166	25	1	0.0703125	97.8608	100.456	560	1.32612	0.978402	NA
2	221830328	rs13405578	ALC:ATF/SPB/LM:VERS/R	7.58999	2.57047e-08	439.326	6.23338e-05	1.53484	170	21	1	0.0598958	100.84	76.8333	560	1.26102	1.40017	NA
2	221830328	rs13405578	ALC:ATF/SPB/LM:VERS/CD	7.42721	3.73933e-08	10.124	3.71529e-05	0.0886455	170	21	1	0.0598958	100.84	76.8333	560	1.26102	1.40017	NA
2	221918667	rs16863167	ALC:ATF/SPB/LM:VERS/R	7.58999	2.57047e-08	439.326	6.23338e-05	1.53484	170	21	1	0.0598958	100.373	80.6095	560	1.24843	1.58142	NA
2	221918667	rs16863167	ALC:ATF/SPB/LM:VERS/CD	7.24575	5.67869e-08	13.7496	6.49397e-05	0.118759	170	21	1	0.0598958	100.373	80.6095	560	1.24843	1.58142	NA
2	233656637	rs11892031	ALC:ATF/SPB/LM:VERS/R	7.58999	2.57047e-08	439.326	6.23338e-05	1.53484	177	14	1	0.0416667	97.3084	109.479	560	1.23277	1.71186	NA
2	233656637	rs11892031	ALC:ATF/SPB/LM:VERS/CD	6.77111	1.69391e-07	58.519	0.000306014	0.429053	177	14	1	0.0416667	97.3084	109.479	560	1.23277	1.71186	NA
3	122194268	rs9826770	ALC:ATF/SPB/LM:VERS/R	7.58999	2.57047e-08	439.326	6.23338e-05	1.53484	185	6	1	0.0208333	97.5124	119.417	560	1.27403	1.00204	NA
3	122194268	rs9826770	ALC:ATF/SPB/LM:VERS/CD	6.7539	1.76239e-07	96.8524	0.000309461	0.561865	185	6	1	0.0208333	97.5124	119.417	560	1.27403	1.00204	NA
3	122990896	rs10084650	ALC:ATF/SPB/LM:VERS/R	7.58999	2.57047e-08	439.326	6.23338e-05	1.53484	173	18	1	0.0520833	98.1982	98.2222	560	1.24709	1.38703	NA
3	122990896	rs10084650	ALC:ATF/SPB/LM:VERS/CD	6.7157	1.92443e-07	42.5212	0.000344555	0.341512	173	18	1	0.0520833	98.1982	98.2222	560	1.24709	1.38703	NA
3	123000881	rs9834538	ALC:ATF/SPB/LM:VERS/R	7.58999	2.57047e-08	439.326	6.23338e-05	1.53484	181	10	1	0.03125	98.2486	97.33	560	1.25365	1.3592	NA
3	123000881	rs9834538	ALC:ATF/SPB/LM:VERS/CD	6.73022	1.86113e-07	69.1283	0.000329243	0.489047	181	10	1	0.03125	98.2486	97.33	560	1.25365	1.3592	NA
3	123014236	rs2034178	ALC:ATF/SPB/LM:VERS/R	7.58999	2.57047e-08	439.326	6.23338e-05	1.53484	183	8	1	0.0260417	98.8579	83.1625	560	1.25803	1.36578	NA
3	123014236	rs2034178	ALC:ATF/SPB/LM:VERS/CD	6.72644	1.87742e-07	70.7569	0.000334103	0.48922	183	8	1	0.0260417	98.8579	83.1625	560	1.25803	1.36578	NA
3	132378824	rs3889989	ALC:ATF/SPB/LM:VERS/R	7.58999	2.57047e-08	439.326	6.23338e-05	1.53484	175	16	1	0.046875	99.7497	81.2556	560	1.26785	1.19264	NA
3	132378824	rs3889989	ALC:ATF/SPB/LM:VERS/CD	6.78919	1.62485e-07	37.0403	0.000288027	0.310518	175	16	1	0.046875	99.7497	81.2556	560	1.26785	1.19264	NA
3	133428805	rs9853339	ALC:ATF/SPB/LM:VERS/R	7.58999	2.57047e-08	439.326	6.23338e-05	1.53484	169	22	1	0.0625	98.6165	95.0045	560	1.26372	1.21517	NA
3	133428805	rs9853339	ALC:ATF/SPB/LM:VERS/CD	6.75588	1.75437e-07	29.175	0.000307447	0.243771	169	22	1	0.0625	98.6165	95.0045	560	1.26372	1.21517	NA
3	189316220	rs77271735	ALC:ATF/SPB/LM:VERS/R	7.58999	2.57047e-08	439.326	6.23338e-05	1.53484	179	12	1	0.0364583	98.2232	97.8608	560	1.24064	1.71156	NA
3	189316220	rs77271735	ALC:ATF/SPB/LM:VERS/CD	6.72874	1.8675e-07	51.9273	0.000326245	0.377912	179	12	1	0.0364583	98.2232	97.8608	560	1.24064	1.71156	NA
4	4424027	rs7677369	ALC:ATF/SPB/LM:VERS/R	7.58999	2.57047e-08	439.326	6.23338e-05	1.53484	181	10	1	0.03125	96.8082	123.4	560	1.26233	1.25985	NA
4	4424027	rs7677369	ALC:ATF/SPB/LM:VERS/CD	6.9437	1.13842e-07	81.9166	0.000191325	0.536684	181	10	1	0.03125	96.8082	123.4	560	1.26233	1.25985	NA
4	48334354	rs17609346	ALC:ATF/SPB/LM:VERS/R	7.58999	2.57047e-08	439.326	6.23338e-05	1.53484	161	30	1	0.0833333	100.183	87.56	560	1.25058	1.35634	NA
4	48334354	rs17609346	ALC:ATF/SPB/LM:VERS/CD	6.83219	1.47168e-07	18.3983	0.000244334	0.167768	161	30	1	0.0833333	100.183	87.56	560	1.25058	1.35634	NA
4	136340913	rs77306597	ALC:ATF/SPB/LM:VERS/R	7.58999	2.57047e-08	439.326	6.23338e-05	1.53484	175	16	1	0.046875	98.0765	99.5563	560	1.26796	1.15927	NA
4	136340913	rs77306597	ALC:ATF/SPB/LM:VERS/CD	6.71995	1.90567e-07	43.0066	0.000340053	0.332551	175	16	1	0.046875	98.0765	99.5563	560	1.26796	1.15927	NA
4	155602256	rs28651947	ALC:ATF/SPB/LM:VERS/R	7.58999	2.57047e-08	439.326	6.23338e-05	1.53484	149	42	1	0.114583	97.7917	99.6507	560	1.32217	1.09117	NA
4	155602256	rs28651947	ALC:ATF/SPB/LM:VERS/CD	6.72346	1.89032e-07	23.976	0.000330493	0.218448	149	42	1	0.114583	97.7917	99.6507	560	1.32217	1.09117	NA
5	8350506	rs114093045	ALC:ATF/SPB/LM:VERS/R	7.58999	2.57047e-08	439.326	6.23338e-05	1.53484	181	10	1	0.03125	98.8209	86.97	560	1.24571	1.96612	NA
5	8350506	rs114093045	ALC:ATF/SPB/LM:VERS/CD	6.83053	1.47732e-07	51.0882	0.000236898	0.365891	181	10	1	0.03125	98.8209	86.97	560	1.24571	1.96612	NA
5	8428328	rs74792821	ALC:ATF/SPB/LM:VERS/R	7.58999	2.57047e-08	439.326	6.23338e-05	1.53484	182	9	1	0.0286458	98.7719	86.6444	560	1.24836	1.86098	NA
5	8428328	rs74792821	ALC:ATF/SPB/LM:VERS/CD	6.86098	1.37729e-07	54.0612	0.000218074	0.375141	182	9	1	0.0286458	98.7719	86.6444	560	1.24836	1.86098	NA
5	9157418	rs1806100	ALC:ATF/SPB/LM:VERS/R	7.58999	2.57047e-08	439.326	6.23338e-05	1.53484	179	12	1	0.0364583	97.9916	101.317	560	1.2513	1.37257	NA
5	9157418	rs1806100	ALC:ATF/SPB/LM:VERS/CD	6.71643	1.92118e-07	57.5664	0.000342739	0.417179	179	12	1	0.0364583	97.9916	101.317	560	1.2513	1.37257	NA
5	9158349	rs1806096	ALC:ATF/SPB/LM:VERS/R	7.58999	2.57047e-08	439.326	6.23338e-05	1.53484	179	12	1	0.0364583	97.9916	101.317	560	1.2513	1.37257	NA
5	9158349	rs1806096	ALC:ATF/SPB/LM:VERS/CD	6.71643	1.92118e-07	57.5664	0.000342739	0.417179	179	12	1	0.0364583	97.9916	101.317	560	1.2513	1.37257	NA
5	9176319	rs10044766	ALC:ATF/SPB/LM:VERS/R	7.58999	2.57047e-08	439.326	6.23338e-05	1.53484	175	16	1	0.046875	98.1411	98.85	560	1.24426	1.45548	NA
5	9176319	rs10044766	ALC:ATF/SPB/LM:VERS/CD	6.72848	1.86863e-07	49.7717	0.00033068	0.391272	175	16	1	0.046875	98.1411	98.85	560	1.24426	1.45548	NA
5	9183085	rs3822774	ALC:ATF/SPB/LM:VERS/R	7.58999	2.57047e-08	439.326	6.23338e-05	1.53484	175	16	1	0.046875	98.1411	98.85	560	1.24426	1.45548	NA
5	9183085	rs3822774	ALC:ATF/SPB/LM:VERS/CD	6.72848	1.86863e-07	49.7717	0.00033068	0.391272	175	16	1	0.046875	98.1411	98.85	560	1.24426	1.45548	NA
5	9184520	rs13436248	ALC:ATF/SPB/LM:VERS/R	7.58999	2.57047e-08	439.326	6.23338e-05	1.53484	175	16	1	0.046875	98.1411	98.85	560	1.24426	1.45548	NA
5	9184520	rs13436248	ALC:ATF/SPB/LM:VERS/CD	6.72848	1.86863e-07	49.7717	0.00033068	0.391272	175	16	1	0.046875	98.1411	98.85	560	1.24426	1.45548	NA
5	13748931	rs35551776	ALC:ATF/SPB/LM:VERS/R	7.58999	2.57047e-08	439.326	6.23338e-05	1.53484	163	28	1	0.078125	100.4	85.395	560	1.23055	1.70295	NA
5	13748931	rs35551776	ALC:ATF/SPB/LM:VERS/CD	6.87379	1.33726e-07	18.1538	0.000202132	0.165254	163	28	1	0.078125	100.4	85.395	560	1.23055	1.70295	NA
5	29692882	rs6889468	ALC:ATF/SPB/LM:VERS/R	7.58999	2.57047e-08	439.326	6.23338e-05	1.53484	181	10	1	0.03125	98.6005	90.96	560	1.25735	1.29771	NA
5	29692882	rs6889468	ALC:ATF/SPB/LM:VERS/CD	6.71507	1.92722e-07	64.3177	0.000344631	0.46324	181	10	1	0.03125	98.6005	90.96	560	1.25735	1.29771	NA
5	30121322	rs35110176	ALC:ATF/SPB/LM:VERS/R	7.58999	2.57047e-08	439.326	6.23338e-05	1.53484	187	4	1	0.015625	98.6165	78.75	560	1.25562	2.58197	NA
5	30121322	rs35110176	ALC:ATF/SPB/LM:VERS/CD	6.73189	1.85401e-07	105.298	0.000324152	0.594776	187	4	1	0.015625	98.6165	78.75	560	1.25562	2.58197	NA
5	32053643	rs13165981	ALC:ATF/SPB/LM:VERS/R	7.58999	2.57047e-08	439.326	6.23338e-05	1.53484	174	17	1	0.0494792	95.7109	123.682	560	1.33604	0.986031	NA
5	32053643	rs13165981	ALC:ATF/SPB/LM:VERS/CD	6.88824	1.29348e-07	57.6982	0.000206978	0.416134	174	17	1	0.0494792	95.7109	123.682	560	1.33604	0.986031	NA
5	113921384	rs111558358	ALC:ATF/SPB/LM:VERS/R	7.58999	2.57047e-08	439.326	6.23338e-05	1.53484	182	9	1	0.0286458	99.4741	72.4444	560	1.25437	2.42321	NA
5	113921384	rs111558358	ALC:ATF/SPB/LM:VERS/CD	6.80293	1.57422e-07	58.309	0.000250566	0.431263	182	9	1	0.0286458	99.4741	72.4444	560	1.25437	2.42321	NA
6	42046211	rs76143776	ALC:ATF/SPB/LM:VERS/R	7.58999	2.57047e-08	439.326	6.23338e-05	1.53484	166	25	1	0.0703125	100.811	80.868	560	1.25759	1.37694	NA
6	42046211	rs76143776	ALC:ATF/SPB/LM:VERS/CD	7.0063	9.85595e-08	16.2378	0.000145541	0.147465	166	25	1	0.0703125	100.811	80.868	560	1.25759	1.37694	NA
6	42057580	rs12208813	ALC:ATF/SPB/LM:VERS/R	7.58999	2.57047e-08	439.326	6.23338e-05	1.53484	166	25	1	0.0703125	100.811	80.868	560	1.25759	1.37694	NA
6	42057580	rs12208813	ALC:ATF/SPB/LM:VERS/CD	7.0063	9.85595e-08	16.2378	0.000145541	0.147465	166	25	1	0.0703125	100.811	80.868	560	1.25759	1.37694	NA
6	44408893	rs74552792	ALC:ATF/SPB/LM:VERS/R	7.58999	2.57047e-08	439.326	6.23338e-05	1.53484	181	10	1	0.03125	97.985	102.1	560	1.26227	1.18427	NA
6	44408893	rs74552792	ALC:ATF/SPB/LM:VERS/CD	6.7295	1.86421e-07	59.5789	0.000331333	0.406957	181	10	1	0.03125	97.985	102.1	560	1.26227	1.18427	NA
6	54759849	rs6942314	ALC:ATF/SPB/LM:VERS/R	7.58999	2.57047e-08	439.326	6.23338e-05	1.53484	171	20	1	0.0572917	98.6267	94.556	560	1.33552	0.870311	NA
6	54759849	rs6942314	ALC:ATF/SPB/LM:VERS/CD	6.74094	1.81577e-07	44.8649	0.000302457	0.378611	171	20	1	0.0572917	98.6267	94.556	560	1.33552	0.870311	NA
6	110035356	rs28503701	ALC:ATF/SPB/LM:VERS/R	7.58999	2.57047e-08	439.326	6.23338e-05	1.53484	161	30	1	0.0833333	98.4621	96.7963	560	1.26815	1.20511	NA
6	110035356	rs28503701	ALC:ATF/SPB/LM:VERS/CD	6.71504	1.92733e-07	28.0642	0.000344707	0.247646	161	30	1	0.0833333	98.4621	96.7963	560	1.26815	1.20511	NA
6	122339158	rs684971	ALC:ATF/SPB/LM:VERS/R	7.58999	2.57047e-08	439.326	6.23338e-05	1.53484	177	14	1	0.0416667	96.6853	117.357	560	1.23554	1.61801	NA
6	122339158	rs684971	ALC:ATF/SPB/LM:VERS/CD	6.75974	1.73885e-07	57.9918	0.000318371	0.409462	177	14	1	0.0416667	96.6853	117.357	560	1.23554	1.61801	NA
6	149982105	rs4869782	ALC:ATF/SPB/LM:VERS/R	7.58999	2.57047e-08	439.326	6.23338e-05	1.53484	142	49	1	0.132812	92.7351	114.039	560	1.35291	1.14917	NA
6	149982105	rs4869782	ALC:ATF/SPB/LM:VERS/CD	7.27402	5.32078e-08	37.5667	6.33668e-05	0.333695	142	49	1	0.132812	92.7351	114.039	560	1.35291	1.14917	NA
6	149982265	rs4870174	ALC:ATF/SPB/LM:VERS/R	7.58999	2.57047e-08	439.326	6.23338e-05	1.53484	141	50	1	0.135417	92.4694	114.362	560	1.34565	1.16409	NA
6	149982265	rs4870174	ALC:ATF/SPB/LM:VERS/CD	7.28183	5.22604e-08	37.2951	6.25256e-05	0.331686	141	50	1	0.135417	92.4694	114.362	560	1.34565	1.16409	NA
6	166704127	rs760837	ALC:ATF/SPB/LM:VERS/R	7.58999	2.57047e-08	439.326	6.23338e-05	1.53484	147	44	1	0.119792	93.1331	115.13	560	1.25097	1.32207	NA
6	166704127	rs760837	ALC:ATF/SPB/LM:VERS/CD	7.06967	8.51785e-08	35.8215	0.000134618	0.311047	147	44	1	0.119792	93.1331	115.13	560	1.25097	1.32207	NA
7	25392903	rs117792665	ALC:ATF/SPB/LM:VERS/R	7.58999	2.57047e-08	439.326	6.23338e-05	1.53484	174	17	1	0.0494792	99.5384	84.5059	560	1.23905	1.89807	NA
7	25392903	rs117792665	ALC:ATF/SPB/LM:VERS/CD	6.80822	1.55518e-07	33.5095	0.0002508	0.279272	174	17	1	0.0494792	99.5384	84.5059	560	1.23905	1.89807	NA
7	31048186	rs61416816	ALC:ATF/SPB/LM:VERS/R	7.58999	2.57047e-08	439.326	6.23338e-05	1.53484	147	44	1	0.119792	94.3081	111.205	560	1.34163	1.12439	NA
7	31048186	rs61416816	ALC:ATF/SPB/LM:VERS/CD	6.96312	1.08862e-07	33.3142	0.000155269	0.293351	147	44	1	0.119792	94.3081	111.205	560	1.34163	1.12439	NA
7	34660777	rs11761197	ALC:ATF/SPB/LM:VERS/R	7.58999	2.57047e-08	439.326	6.23338e-05	1.53484	144	47	1	0.127604	96.6014	103.1	560	1.31906	1.12954	NA
7	34660777	rs11761197	ALC:ATF/SPB/LM:VERS/CD	6.73684	1.83298e-07	23.3313	0.000319105	0.212042	144	47	1	0.127604	96.6014	103.1	560	1.31906	1.12954	NA
7	45479255	rs1949873	ALC:ATF/SPB/LM:VERS/R	7.58999	2.57047e-08	439.326	6.23338e-05	1.53484	171	20	1	0.0572917	99.4351	87.6445	560	1.23281	1.8368	NA
7	45479255	rs1949873	ALC:ATF/SPB/LM:VERS/CD	6.7986	1.59003e-07	29.2174	0.000256337	0.248244	171	20	1	0.0572917	99.4351	87.6445	560	1.23281	1.8368	NA
7	120357213	rs12706278	ALC:ATF/SPB/LM:VERS/R	7.58999	2.57047e-08	439.326	6.23338e-05	1.53484	165	26	1	0.0729167	98.4949	96.3319	560	1.24133	1.3958	NA
7	120357213	rs12706278	ALC:ATF/SPB/LM:VERS/CD	6.7183	1.91294e-07	29.5968	0.0003398	0.255266	165	26	1	0.0729167	98.4949	96.3319	560	1.24133	1.3958	NA
7	120547378	rs10227379	ALC:ATF/SPB/LM:VERS/R	7.58999	2.57047e-08	439.326	6.23338e-05	1.53484	173	18	1	0.0520833	98.7514	92.9056	560	1.26092	1.23522	NA
7	120547378	rs10227379	ALC:ATF/SPB/LM:VERS/CD	6.74947	1.78047e-07	35.439	0.00030934	0.288304	173	18	1	0.0520833	98.7514	92.9056	560	1.26092	1.23522	NA
7	120572015	rs12111645	ALC:ATF/SPB/LM:VERS/R	7.58999	2.57047e-08	439.326	6.23338e-05	1.53484	172	19	1	0.0546875	98.4941	95.5421	560	1.25515	1.29124	NA
7	120572015	rs12111645	ALC:ATF/SPB/LM:VERS/CD	6.73688	1.8328e-07	35.0052	0.000320303	0.284677	172	19	1	0.0546875	98.4941	95.5421	560	1.25515	1.29124	NA
7	120583030	rs10262476	ALC:ATF/SPB/LM:VERS/R	7.58999	2.57047e-08	439.326	6.23338e-05	1.53484	172	19	1	0.0546875	98.4941	95.5421	560	1.25515	1.29124	NA
7	120583030	rs10262476	ALC:ATF/SPB/LM:VERS/CD	6.73688	1.8328e-07	35.0052	0.000320303	0.284677	172	19	1	0.0546875	98.4941	95.5421	560	1.25515	1.29124	NA
7	139913952	rs76454052	ALC:ATF/SPB/LM:VERS/R	7.58999	2.57047e-08	439.326	6.23338e-05	1.53484	148	43	1	0.117188	96.3358	104.618	560	1.30302	1.15281	NA
7	139913952	rs76454052	ALC:ATF/SPB/LM:VERS/CD	6.83252	1.47055e-07	30.059	0.00023524	0.270671	148	43	1	0.117188	96.3358	104.618	560	1.30302	1.15281	NA
7	146715624	rs12113836	ALC:ATF/SPB/LM:VERS/R	7.58999	2.57047e-08	439.326	6.23338e-05	1.53484	167	24	1	0.0677083	98.048	99.2613	560	1.23204	1.50288	NA
7	146715624	rs12113836	ALC:ATF/SPB/LM:VERS/CD	6.72538	1.88201e-07	36.5762	0.000334425	0.3095	167	24	1	0.0677083	98.048	99.2613	560	1.23204	1.50288	NA
7	146716405	rs344470	ALC:ATF/SPB/LM:VERS/R	7.58999	2.57047e-08	439.326	6.23338e-05	1.53484	161	30	1	0.0833333	99.1579	93.0623	560	1.23282	1.47355	NA
7	146716405	rs344470	ALC:ATF/SPB/LM:VERS/CD	6.73435	1.84352e-07	24.1566	0.000325719	0.215955	161	30	1	0.0833333	99.1579	93.0623	560	1.23282	1.47355	NA
7	154795216	rs3807268	ALC:ATF/SPB/LM:VERS/R	7.58999	2.57047e-08	439.326	6.23338e-05	1.53484	156	35	1	0.0963542	95.7454	109.143	560	1.3231	1.09973	NA
7	154795216	rs3807268	ALC:ATF/SPB/LM:VERS/CD	7.02585	9.42219e-08	40.233	0.000133687	0.349267	156	35	1	0.0963542	95.7454	109.143	560	1.3231	1.09973	NA
7	154798731	rs28553465	ALC:ATF/SPB/LM:VERS/R	7.58999	2.57047e-08	439.326	6.23338e-05	1.53484	158	33	1	0.0911458	96.4892	106.394	560	1.33704	1.04554	NA
7	154798731	rs28553465	ALC:ATF/SPB/LM:VERS/CD	6.86656	1.35969e-07	36.8718	0.000213168	0.31968	158	33	1	0.0911458	96.4892	106.394	560	1.33704	1.04554	NA
8	71351721	rs2218488	ALC:ATF/SPB/LM:VERS/R	7.58999	2.57047e-08	439.326	6.23338e-05	1.53484	137	54	1	0.145833	95.7204	104.493	560	1.24985	1.28396	NA
8	71351721	rs2218488	ALC:ATF/SPB/LM:VERS/CD	6.93761	1.15449e-07	29.6999	0.000177503	0.274943	137	54	1	0.145833	95.7204	104.493	560	1.24985	1.28396	NA
8	101371088	rs116859215	ALC:ATF/SPB/LM:VERS/R	7.58999	2.57047e-08	439.326	6.23338e-05	1.53484	185	6	1	0.0208333	99.9113	45.45	560	1.2758	1.31047	NA
8	101371088	rs116859215	ALC:ATF/SPB/LM:VERS/CD	7.24676	5.66554e-08	59.606	4.83094e-05	0.41173	185	6	1	0.0208333	99.9113	45.45	560	1.2758	1.31047	NA
8	109723718	rs75947289	ALC:ATF/SPB/LM:VERS/R	7.58999	2.57047e-08	439.326	6.23338e-05	1.53484	183	8	1	0.0260417	97.8469	106.287	560	1.23676	2.57181	NA
8	109723718	rs75947289	ALC:ATF/SPB/LM:VERS/CD	6.76047	1.73593e-07	82.7356	0.000314289	0.537299	183	8	1	0.0260417	97.8469	106.287	560	1.23676	2.57181	NA
8	122253081	rs10956072	ALC:ATF/SPB/LM:VERS/R	7.58999	2.57047e-08	439.326	6.23338e-05	1.53484	175	16	1	0.046875	98.2565	97.5875	560	1.28064	1.05884	NA
8	122253081	rs10956072	ALC:ATF/SPB/LM:VERS/CD	6.72969	1.8634e-07	41.2734	0.00033402	0.321099	175	16	1	0.046875	98.2565	97.5875	560	1.28064	1.05884	NA
8	122271614	rs74343039	ALC:ATF/SPB/LM:VERS/R	7.58999	2.57047e-08	439.326	6.23338e-05	1.53484	175	16	1	0.046875	98.2565	97.5875	560	1.28064	1.05884	NA
8	122271614	rs74343039	ALC:ATF/SPB/LM:VERS/CD	6.72969	1.8634e-07	41.2734	0.00033402	0.321099	175	16	1	0.046875	98.2565	97.5875	560	1.28064	1.05884	NA
8	134740353	rs4909358	ALC:ATF/SPB/LM:VERS/R	7.58999	2.57047e-08	439.326	6.23338e-05	1.53484	162	29	1	0.0807292	99.9802	88.2586	560	1.24402	1.4185	NA
8	134740353	rs4909358	ALC:ATF/SPB/LM:VERS/CD	6.76717	1.70934e-07	22.6381	0.00028878	0.206018	162	29	1	0.0807292	99.9802	88.2586	560	1.24402	1.4185	NA
9	4021867	rs474546	ALC:ATF/SPB/LM:VERS/R	7.58999	2.57047e-08	439.326	6.23338e-05	1.53484	172	19	1	0.0546875	97.9604	100.374	560	1.25355	1.29991	NA
9	4021867	rs474546	ALC:ATF/SPB/LM:VERS/CD	6.72045	1.90349e-07	37.3827	0.000338328	0.297884	172	19	1	0.0546875	97.9604	100.374	560	1.25355	1.29991	NA
9	4026034	rs12003592	ALC:ATF/SPB/LM:VERS/R	7.58999	2.57047e-08	439.326	6.23338e-05	1.53484	180	11	1	0.0338542	97.5005	109.655	560	1.26347	1.19488	NA
9	4026034	rs12003592	ALC:ATF/SPB/LM:VERS/CD	6.74445	1.80115e-07	66.136	0.000317692	0.457641	180	11	1	0.0338542	97.5005	109.655	560	1.26347	1.19488	NA
9	4026171	rs622773	ALC:ATF/SPB/LM:VERS/R	7.58999	2.57047e-08	439.326	6.23338e-05	1.53484	178	13	1	0.0390625	97.982	101.192	560	1.26684	1.15097	NA
9	4026171	rs622773	ALC:ATF/SPB/LM:VERS/CD	6.72043	1.90357e-07	55.7243	0.000338673	0.412659	178	13	1	0.0390625	97.982	101.192	560	1.26684	1.15097	NA
9	90110245	rs13290047	ALC:ATF/SPB/LM:VERS/R	7.58999	2.57047e-08	439.326	6.23338e-05	1.53484	161	30	1	0.0833333	98.4016	97.121	560	1.30955	1.0497	NA
9	90110245	rs13290047	ALC:ATF/SPB/LM:VERS/CD	6.72364	1.88957e-07	25.201	0.000341514	0.220712	161	30	1	0.0833333	98.4016	97.121	560	1.30955	1.0497	NA
9	91185771	rs60953089	ALC:ATF/SPB/LM:VERS/R	7.58999	2.57047e-08	439.326	6.23338e-05	1.53484	154	37	1	0.101562	100.645	88.0268	560	1.20618	1.84787	NA
9	91185771	rs60953089	ALC:ATF/SPB/LM:VERS/CD	6.85015	1.41204e-07	14.106	0.000213683	0.13199	154	37	1	0.101562	100.645	88.0268	560	1.20618	1.84787	NA
9	91696179	rs117353646	ALC:ATF/SPB/LM:VERS/R	7.58999	2.57047e-08	439.326	6.23338e-05	1.53484	185	6	1	0.0208333	98.9745	74.3333	560	1.2545	3.10948	NA
9	91696179	rs117353646	ALC:ATF/SPB/LM:VERS/CD	6.79451	1.60506e-07	77.536	0.000260599	0.499766	185	6	1	0.0208333	98.9745	74.3333	560	1.2545	3.10948	NA
9	99683975	rs72744669	ALC:ATF/SPB/LM:VERS/R	7.58999	2.57047e-08	439.326	6.23338e-05	1.53484	179	12	1	0.0364583	98.9016	87.7417	560	1.25521	1.36855	NA
9	99683975	rs72744669	ALC:ATF/SPB/LM:VERS/CD	6.71597	1.92321e-07	56.1225	0.000342943	0.429938	179	12	1	0.0364583	98.9016	87.7417	560	1.25521	1.36855	NA
9	100043436	rs117794059	ALC:ATF/SPB/LM:VERS/R	7.58999	2.57047e-08	439.326	6.23338e-05	1.53484	180	11	1	0.0338542	99.2805	80.5273	560	1.25957	1.34269	NA
9	100043436	rs117794059	ALC:ATF/SPB/LM:VERS/CD	6.72992	1.86243e-07	56.7616	0.000325962	0.435953	180	11	1	0.0338542	99.2805	80.5273	560	1.25957	1.34269	NA
9	100197885	rs79169178	ALC:ATF/SPB/LM:VERS/R	7.58999	2.57047e-08	439.326	6.23338e-05	1.53484	181	10	1	0.03125	99.0193	83.38	560	1.2585	1.33564	NA
9	100197885	rs79169178	ALC:ATF/SPB/LM:VERS/CD	6.72044	1.90354e-07	62.3618	0.000337324	0.461388	181	10	1	0.03125	99.0193	83.38	560	1.2585	1.33564	NA
9	131353094	rs57069558	ALC:ATF/SPB/LM:VERS/R	7.58999	2.57047e-08	439.326	6.23338e-05	1.53484	163	28	1	0.078125	97.2852	103.529	560	1.29254	1.11441	NA
9	131353094	rs57069558	ALC:ATF/SPB/LM:VERS/CD	6.88114	1.3148e-07	42.2055	0.000192438	0.363904	163	28	1	0.078125	97.2852	103.529	560	1.29254	1.11441	NA
10	20931205	rs11596224	ALC:ATF/SPB/LM:VERS/R	7.58999	2.57047e-08	439.326	6.23338e-05	1.53484	182	9	1	0.0286458	97.5252	111.856	560	1.2392	1.86211	NA
10	20931205	rs11596224	ALC:ATF/SPB/LM:VERS/CD	6.84939	1.41451e-07	83.0586	0.000237804	0.54952	182	9	1	0.0286458	97.5252	111.856	560	1.2392	1.86211	NA
10	47089166	rs9422357	ALC:ATF/SPB/LM:VERS/R	7.58999	2.57047e-08	439.326	6.23338e-05	1.53484	162	29	1	0.0807292	98.7586	95.0828	560	1.27295	1.17838	NA
10	47089166	rs9422357	ALC:ATF/SPB/LM:VERS/CD	6.77456	1.6805e-07	21.4726	0.00029164	0.187414	162	29	1	0.0807292	98.7586	95.0828	560	1.27295	1.17838	NA
10	108603319	rs73416671	ALC:ATF/SPB/LM:VERS/R	7.58999	2.57047e-08	439.326	6.23338e-05	1.53484	145	46	1	0.125	97.3461	100.893	560	1.26251	1.24582	NA
10	108603319	rs73416671	ALC:ATF/SPB/LM:VERS/CD	6.77138	1.69286e-07	26.4136	0.000291656	0.242937	145	46	1	0.125	97.3461	100.893	560	1.26251	1.24582	NA
10	111597155	rs1010523	ALC:ATF/SPB/LM:VERS/R	7.58999	2.57047e-08	439.326	6.23338e-05	1.53484	179	12	1	0.0364583	99.2446	82.625	560	1.2441	2.17571	NA
10	111597155	rs1010523	ALC:ATF/SPB/LM:VERS/CD	6.73592	1.8369e-07	52.0095	0.000316692	0.404993	179	12	1	0.0364583	99.2446	82.625	560	1.2441	2.17571	NA
11	3075325	rs4523675	ALC:ATF/SPB/LM:VERS/R	7.58999	2.57047e-08	439.326	6.23338e-05	1.53484	141	50	1	0.135417	98.7683	96.5992	560	1.20327	1.48176	NA
11	3075325	rs4523675	ALC:ATF/SPB/LM:VERS/CD	6.72569	1.88066e-07	22.1019	0.000336993	0.208246	141	50	1	0.135417	98.7683	96.5992	560	1.20327	1.48176	NA
11	4682091	rs1123990	ALC:ATF/SPB/LM:VERS/R	7.58999	2.57047e-08	439.326	6.23338e-05	1.53484	182	9	1	0.0286458	99.4835	72.2556	560	1.25527	2.2193	NA
11	4682091	rs1123990	ALC:ATF/SPB/LM:VERS/CD	6.94215	1.14249e-07	50.5072	0.000161659	0.369612	182	9	1	0.0286458	99.4835	72.2556	560	1.25527	2.2193	NA
11	4682190	rs7939559	ALC:ATF/SPB/LM:VERS/R	7.58999	2.57047e-08	439.326	6.23338e-05	1.53484	182	9	1	0.0286458	99.4835	72.2556	560	1.25527	2.2193	NA
11	4682190	rs7939559	ALC:ATF/SPB/LM:VERS/CD	6.94215	1.14249e-07	50.5072	0.000161659	0.369612	182	9	1	0.0286458	99.4835	72.2556	560	1.25527	2.2193	NA
11	4682424	rs12575331	ALC:ATF/SPB/LM:VERS/R	7.58999	2.57047e-08	439.326	6.23338e-05	1.53484	182	9	1	0.0286458	99.4835	72.2556	560	1.25527	2.2193	NA
11	4682424	rs12575331	ALC:ATF/SPB/LM:VERS/CD	6.94215	1.14249e-07	50.5072	0.000161659	0.369612	182	9	1	0.0286458	99.4835	72.2556	560	1.25527	2.2193	NA
11	4685422	rs12577780	ALC:ATF/SPB/LM:VERS/R	7.58999	2.57047e-08	439.326	6.23338e-05	1.53484	182	9	1	0.0286458	99.4835	72.2556	560	1.25527	2.2193	NA
11	4685422	rs12577780	ALC:ATF/SPB/LM:VERS/CD	6.94215	1.14249e-07	50.5072	0.000161659	0.369612	182	9	1	0.0286458	99.4835	72.2556	560	1.25527	2.2193	NA
11	12410384	rs35069152	ALC:ATF/SPB/LM:VERS/R	7.58999	2.57047e-08	439.326	6.23338e-05	1.53484	176	15	1	0.0442708	100.015	76.9153	560	1.2655	1.27111	NA
11	12410384	rs35069152	ALC:ATF/SPB/LM:VERS/CD	6.82016	1.51299e-07	37.6654	0.00024289	0.316862	176	15	1	0.0442708	100.015	76.9153	560	1.2655	1.27111	NA
11	12420329	rs11022350	ALC:ATF/SPB/LM:VERS/R	7.58999	2.57047e-08	439.326	6.23338e-05	1.53484	180	11	1	0.0338542	99.3559	79.2936	560	1.26392	1.23222	NA
11	12420329	rs11022350	ALC:ATF/SPB/LM:VERS/CD	6.76738	1.70854e-07	52.1983	0.000291009	0.400426	180	11	1	0.0338542	99.3559	79.2936	560	1.26392	1.23222	NA
11	55743391	rs117510229	ALC:ATF/SPB/LM:VERS/R	7.58999	2.57047e-08	439.326	6.23338e-05	1.53484	182	9	1	0.0286458	99.6324	69.2444	560	1.26049	1.72207	NA
11	55743391	rs117510229	ALC:ATF/SPB/LM:VERS/CD	6.91356	1.22023e-07	52.0544	0.000172764	0.386586	182	9	1	0.0286458	99.6324	69.2444	560	1.26049	1.72207	NA
11	109285968	rs7128282	ALC:ATF/SPB/LM:VERS/R	7.58999	2.57047e-08	439.326	6.23338e-05	1.53484	161	30	1	0.0833333	100.242	87.2423	560	1.23558	1.53004	NA
11	109285968	rs7128282	ALC:ATF/SPB/LM:VERS/CD	6.77811	1.66684e-07	21.4049	0.00027936	0.196768	161	30	1	0.0833333	100.242	87.2423	560	1.23558	1.53004	NA
11	109286055	rs1482047	ALC:ATF/SPB/LM:VERS/R	7.58999	2.57047e-08	439.326	6.23338e-05	1.53484	155	36	1	0.0989583	101.026	86.0353	560	1.22796	1.5878	NA
11	109286055	rs1482047	ALC:ATF/SPB/LM:VERS/CD	6.85105	1.40914e-07	14.7908	0.00021959	0.13959	155	36	1	0.0989583	101.026	86.0353	560	1.22796	1.5878	NA
11	109304577	rs6589065	ALC:ATF/SPB/LM:VERS/R	7.58999	2.57047e-08	439.326	6.23338e-05	1.53484	161	30	1	0.0833333	100.242	87.2423	560	1.23558	1.53004	NA
11	109304577	rs6589065	ALC:ATF/SPB/LM:VERS/CD	6.77811	1.66684e-07	21.4049	0.00027936	0.196768	161	30	1	0.0833333	100.242	87.2423	560	1.23558	1.53004	NA
11	111250884	rs74511551	ALC:ATF/SPB/LM:VERS/R	7.58999	2.57047e-08	439.326	6.23338e-05	1.53484	184	7	1	0.0234375	99.7543	57.3571	560	1.26743	1.81977	NA
11	111250884	rs74511551	ALC:ATF/SPB/LM:VERS/CD	7.14591	7.14644e-08	54.8356	7.82638e-05	0.386235	184	7	1	0.0234375	99.7543	57.3571	560	1.26743	1.81977	NA
11	111307420	rs17112579	ALC:ATF/SPB/LM:VERS/R	7.58999	2.57047e-08	439.326	6.23338e-05	1.53484	175	16	1	0.046875	100.101	77.4106	560	1.24995	1.78523	NA
11	111307420	rs17112579	ALC:ATF/SPB/LM:VERS/CD	6.90821	1.23535e-07	31.0356	0.000176538	0.262427	175	16	1	0.046875	100.101	77.4106	560	1.24995	1.78523	NA
11	113025079	rs77682594	ALC:ATF/SPB/LM:VERS/R	7.58999	2.57047e-08	439.326	6.23338e-05	1.53484	181	10	1	0.03125	99.8283	68.737	560	1.2683	1.24625	NA
11	113025079	rs77682594	ALC:ATF/SPB/LM:VERS/CD	7.10217	7.90369e-08	40.538	9.92251e-05	0.308295	181	10	1	0.03125	99.8283	68.737	560	1.2683	1.24625	NA
11	114168503	rs686989	ALC:ATF/SPB/LM:VERS/R	7.58999	2.57047e-08	439.326	6.23338e-05	1.53484	155	36	1	0.0989583	97.1794	102.597	560	1.29021	1.15292	NA
11	114168503	rs686989	ALC:ATF/SPB/LM:VERS/CD	6.81474	1.53199e-07	33.1867	0.000249641	0.295588	155	36	1	0.0989583	97.1794	102.597	560	1.29021	1.15292	NA
11	114478157	rs78651097	ALC:ATF/SPB/LM:VERS/R	7.58999	2.57047e-08	439.326	6.23338e-05	1.53484	164	27	1	0.0755208	96.665	107.527	560	1.40473	0.892855	NA
11	114478157	rs78651097	ALC:ATF/SPB/LM:VERS/CD	6.77608	1.67465e-07	37.4606	0.000268705	0.311664	164	27	1	0.0755208	96.665	107.527	560	1.40473	0.892855	NA
12	3216649	rs10848825	ALC:ATF/SPB/LM:VERS/R	7.58999	2.57047e-08	439.326	6.23338e-05	1.53484	152	39	1	0.106771	95.5368	108.582	560	1.21183	1.46797	NA
12	3216649	rs10848825	ALC:ATF/SPB/LM:VERS/CD	6.97029	1.0708e-07	36.2148	0.000182957	0.31852	152	39	1	0.106771	95.5368	108.582	560	1.21183	1.46797	NA
12	4492716	rs78869064	ALC:ATF/SPB/LM:VERS/R	7.58999	2.57047e-08	439.326	6.23338e-05	1.53484	182	9	1	0.0286458	98.2857	96.4778	560	1.23678	2.94319	NA
12	4492716	rs78869064	ALC:ATF/SPB/LM:VERS/CD	6.72044	1.90353e-07	71.8696	0.000343446	0.494599	182	9	1	0.0286458	98.2857	96.4778	560	1.23678	2.94319	NA
12	43081496	rs79024095	ALC:ATF/SPB/LM:VERS/R	7.58999	2.57047e-08	439.326	6.23338e-05	1.53484	171	20	1	0.0572917	99.0875	90.6165	560	1.24603	1.43886	NA
12	43081496	rs79024095	ALC:ATF/SPB/LM:VERS/CD	6.73484	1.84147e-07	34.1611	0.000321528	0.288528	171	20	1	0.0572917	99.0875	90.6165	560	1.24603	1.43886	NA
12	66762597	rs10506498	ALC:ATF/SPB/LM:VERS/R	7.58999	2.57047e-08	439.326	6.23338e-05	1.53484	167	24	1	0.0677083	100.776	80.2792	560	1.27705	1.16538	NA
12	66762597	rs10506498	ALC:ATF/SPB/LM:VERS/CD	6.92507	1.18832e-07	19.9071	0.000181624	0.181153	167	24	1	0.0677083	100.776	80.2792	560	1.27705	1.16538	NA
12	85805157	rs7397266	ALC:ATF/SPB/LM:VERS/R	7.58999	2.57047e-08	439.326	6.23338e-05	1.53484	163	28	1	0.078125	96.4396	108.451	560	1.25332	1.29605	NA
12	85805157	rs7397266	ALC:ATF/SPB/LM:VERS/CD	6.89102	1.28523e-07	41.7903	0.000214591	0.351305	163	28	1	0.078125	96.4396	108.451	560	1.25332	1.29605	NA
12	85818995	rs11837152	ALC:ATF/SPB/LM:VERS/R	7.58999	2.57047e-08	439.326	6.23338e-05	1.53484	163	28	1	0.078125	96.4396	108.451	560	1.25332	1.29605	NA
12	85818995	rs11837152	ALC:ATF/SPB/LM:VERS/CD	6.89102	1.28523e-07	41.7903	0.000214591	0.351305	163	28	1	0.078125	96.4396	108.451	560	1.25332	1.29605	NA
12	87600075	rs17015003	ALC:ATF/SPB/LM:VERS/R	7.58999	2.57047e-08	439.326	6.23338e-05	1.53484	184	7	1	0.0234375	97.9309	105.286	560	1.24127	2.33131	NA
12	87600075	rs17015003	ALC:ATF/SPB/LM:VERS/CD	6.71699	1.9187e-07	82.564	0.000345219	0.514828	184	7	1	0.0234375	97.9309	105.286	560	1.24127	2.33131	NA
12	87922709	rs4363696	ALC:ATF/SPB/LM:VERS/R	7.58999	2.57047e-08	439.326	6.23338e-05	1.53484	177	14	1	0.0416667	98.5847	93.3429	560	1.23459	1.97298	NA
12	87922709	rs4363696	ALC:ATF/SPB/LM:VERS/CD	6.73791	1.82847e-07	44.9266	0.000314132	0.34565	177	14	1	0.0416667	98.5847	93.3429	560	1.23459	1.97298	NA
12	92295961	rs76473672	ALC:ATF/SPB/LM:VERS/R	7.58999	2.57047e-08	439.326	6.23338e-05	1.53484	170	21	1	0.0598958	94.8629	125.219	560	1.27874	1.23861	NA
12	92295961	rs76473672	ALC:ATF/SPB/LM:VERS/CD	7.45994	3.46783e-08	64.0806	4.49565e-05	0.488097	170	21	1	0.0598958	94.8629	125.219	560	1.27874	1.23861	NA
12	96050776	rs41392450	ALC:ATF/SPB/LM:VERS/R	7.58999	2.57047e-08	439.326	6.23338e-05	1.53484	163	28	1	0.078125	98.7791	94.8321	560	1.31299	1.01775	NA
12	96050776	rs41392450	ALC:ATF/SPB/LM:VERS/CD	6.74399	1.80306e-07	24.4597	0.00032624	0.213703	163	28	1	0.078125	98.7791	94.8321	560	1.31299	1.01775	NA
12	96062265	rs76774859	ALC:ATF/SPB/LM:VERS/R	7.58999	2.57047e-08	439.326	6.23338e-05	1.53484	163	28	1	0.078125	98.7791	94.8321	560	1.31299	1.01775	NA
12	96062265	rs76774859	ALC:ATF/SPB/LM:VERS/CD	6.74399	1.80306e-07	24.4597	0.00032624	0.213703	163	28	1	0.078125	98.7791	94.8321	560	1.31299	1.01775	NA
12	122313104	rs117473827	ALC:ATF/SPB/LM:VERS/R	7.58999	2.57047e-08	439.326	6.23338e-05	1.53484	186	5	1	0.0182292	98.351	92.6	560	1.25005	2.32498	NA
12	122313104	rs117473827	ALC:ATF/SPB/LM:VERS/CD	6.79191	1.61468e-07	87.434	0.000270464	0.506219	186	5	1	0.0182292	98.351	92.6	560	1.25005	2.32498	NA
13	81545435	rs12863834	ALC:ATF/SPB/LM:VERS/R	7.58999	2.57047e-08	439.326	6.23338e-05	1.53484	179	12	1	0.0364583	99.3413	81.1833	560	1.30715	0.777578	NA
13	81545435	rs12863834	ALC:ATF/SPB/LM:VERS/CD	7.03728	9.17746e-08	35.5878	0.000156041	0.270241	179	12	1	0.0364583	99.3413	81.1833	560	1.30715	0.777578	NA
13	90119341	rs9583789	ALC:ATF/SPB/LM:VERS/R	7.58999	2.57047e-08	439.326	6.23338e-05	1.53484	160	31	1	0.0859375	99.5298	91.3397	560	1.28427	1.13298	NA
13	90119341	rs9583789	ALC:ATF/SPB/LM:VERS/CD	6.72027	1.90429e-07	30.9512	0.000334721	0.284834	160	31	1	0.0859375	99.5298	91.3397	560	1.28427	1.13298	NA
13	104688638	rs12429630	ALC:ATF/SPB/LM:VERS/R	7.58999	2.57047e-08	439.326	6.23338e-05	1.53484	163	28	1	0.078125	97.4869	102.355	560	1.2627	1.23483	NA
13	104688638	rs12429630	ALC:ATF/SPB/LM:VERS/CD	6.72435	1.88648e-07	32.1938	0.000337155	0.274298	163	28	1	0.078125	97.4869	102.355	560	1.2627	1.23483	NA
13	109599504	rs72663969	ALC:ATF/SPB/LM:VERS/R	7.58999	2.57047e-08	439.326	6.23338e-05	1.53484	176	15	1	0.0442708	100.501	71.2133	560	1.25269	2.29692	NA
13	109599504	rs72663969	ALC:ATF/SPB/LM:VERS/CD	7.17196	6.73044e-08	24.5798	7.45565e-05	0.207575	176	15	1	0.0442708	100.501	71.2133	560	1.25269	2.29692	NA
14	99184812	rs61981480	ALC:ATF/SPB/LM:VERS/R	7.58999	2.57047e-08	439.326	6.23338e-05	1.53484	181	10	1	0.03125	99.2331	79.51	560	1.25252	1.76914	NA
14	99184812	rs61981480	ALC:ATF/SPB/LM:VERS/CD	6.77072	1.69543e-07	55.6709	0.000283104	0.414617	181	10	1	0.03125	99.2331	79.51	560	1.25252	1.76914	NA
14	104866918	rs78092206	ALC:ATF/SPB/LM:VERS/R	7.58999	2.57047e-08	439.326	6.23338e-05	1.53484	161	30	1	0.0833333	102.624	74.4633	560	1.25989	1.51492	NA
14	104866918	rs78092206	ALC:ATF/SPB/LM:VERS/CD	7.49114	3.22744e-08	3.05643	2.74398e-05	0.0291994	161	30	1	0.0833333	102.624	74.4633	560	1.25989	1.51492	NA
15	57746798	rs62000097	ALC:ATF/SPB/LM:VERS/R	7.58999	2.57047e-08	439.326	6.23338e-05	1.53484	178	13	1	0.0390625	95.4303	136.131	560	1.34597	0.958868	NA
15	57746798	rs62000097	ALC:ATF/SPB/LM:VERS/CD	7.37026	4.26324e-08	81.8028	5.17409e-05	0.54866	178	13	1	0.0390625	95.4303	136.131	560	1.34597	0.958868	NA
15	96804672	rs116059635	ALC:ATF/SPB/LM:VERS/R	7.58999	2.57047e-08	439.326	6.23338e-05	1.53484	161	30	1	0.0833333	101.587	80.0277	560	1.24788	1.52755	NA
15	96804672	rs116059635	ALC:ATF/SPB/LM:VERS/CD	7.10128	7.91994e-08	10.5156	9.67354e-05	0.0986549	161	30	1	0.0833333	101.587	80.0277	560	1.24788	1.52755	NA
15	101578309	rs34421115	ALC:ATF/SPB/LM:VERS/R	7.58999	2.57047e-08	439.326	6.23338e-05	1.53484	171	20	1	0.0572917	97.2649	106.2	560	1.25253	1.30864	NA
15	101578309	rs34421115	ALC:ATF/SPB/LM:VERS/CD	6.75193	1.77041e-07	44.4183	0.000307478	0.353292	171	20	1	0.0572917	97.2649	106.2	560	1.25253	1.30864	NA
16	9611504	rs13333400	ALC:ATF/SPB/LM:VERS/R	7.58999	2.57047e-08	439.326	6.23338e-05	1.53484	155	36	1	0.0989583	95.9354	107.953	560	1.28584	1.1855	NA
16	9611504	rs13333400	ALC:ATF/SPB/LM:VERS/CD	7.00419	9.90404e-08	39.1357	0.000147724	0.342605	155	36	1	0.0989583	95.9354	107.953	560	1.28584	1.1855	NA
16	11314518	rs111386716	ALC:ATF/SPB/LM:VERS/R	7.58999	2.57047e-08	439.326	6.23338e-05	1.53484	181	10	1	0.03125	98.0231	101.41	560	1.24276	1.70724	NA
16	11314518	rs111386716	ALC:ATF/SPB/LM:VERS/CD	6.71744	1.91674e-07	62.0842	0.000340237	0.427636	181	10	1	0.03125	98.0231	101.41	560	1.24276	1.70724	NA
16	12062650	rs12920944	ALC:ATF/SPB/LM:VERS/R	7.58999	2.57047e-08	439.326	6.23338e-05	1.53484	180	11	1	0.0338542	100.766	56.2155	560	1.27187	2.04619	NA
16	12062650	rs12920944	ALC:ATF/SPB/LM:VERS/CD	7.23461	5.82627e-08	34.1874	5.10204e-05	0.283304	180	11	1	0.0338542	100.766	56.2155	560	1.27187	2.04619	NA
16	57138095	rs55987113	ALC:ATF/SPB/LM:VERS/R	7.58999	2.57047e-08	439.326	6.23338e-05	1.53484	186	5	1	0.0182292	98.0645	103.26	560	1.2495	1.88144	NA
16	57138095	rs55987113	ALC:ATF/SPB/LM:VERS/CD	6.72711	1.87454e-07	102.852	0.000336405	0.591258	186	5	1	0.0182292	98.0645	103.26	560	1.2495	1.88144	NA
16	86690762	rs11861404	ALC:ATF/SPB/LM:VERS/R	7.58999	2.57047e-08	439.326	6.23338e-05	1.53484	177	14	1	0.0416667	97.3756	108.629	560	1.21859	2.41814	NA
16	86690762	rs11861404	ALC:ATF/SPB/LM:VERS/CD	6.72024	1.90441e-07	52.8159	0.00034591	0.384157	177	14	1	0.0416667	97.3756	108.629	560	1.21859	2.41814	NA
16	86694001	rs35254177	ALC:ATF/SPB/LM:VERS/R	7.58999	2.57047e-08	439.326	6.23338e-05	1.53484	177	14	1	0.0416667	97.3756	108.629	560	1.21859	2.41814	NA
16	86694001	rs35254177	ALC:ATF/SPB/LM:VERS/CD	6.72024	1.90441e-07	52.8159	0.00034591	0.384157	177	14	1	0.0416667	97.3756	108.629	560	1.21859	2.41814	NA
16	87804018	rs77878228	ALC:ATF/SPB/LM:VERS/R	7.58999	2.57047e-08	439.326	6.23338e-05	1.53484	179	12	1	0.0364583	98.2508	97.45	560	1.24608	1.52242	NA
16	87804018	rs77878228	ALC:ATF/SPB/LM:VERS/CD	6.71738	1.91701e-07	54.4598	0.000340394	0.39907	179	12	1	0.0364583	98.2508	97.45	560	1.24608	1.52242	NA
17	1024234	rs78264756	ALC:ATF/SPB/LM:VERS/R	7.58999	2.57047e-08	439.326	6.23338e-05	1.53484	183	8	1	0.0260417	99.3995	70.7738	560	1.25811	1.93604	NA
17	1024234	rs78264756	ALC:ATF/SPB/LM:VERS/CD	6.77083	1.695e-07	66.4984	0.000281806	0.477793	183	8	1	0.0260417	99.3995	70.7738	560	1.25811	1.93604	NA
17	16606603	rs1005369	ALC:ATF/SPB/LM:VERS/R	7.58999	2.57047e-08	439.326	6.23338e-05	1.53484	161	30	1	0.0833333	100.687	84.8567	560	1.22292	1.8539	NA
17	16606603	rs1005369	ALC:ATF/SPB/LM:VERS/CD	6.95918	1.09855e-07	13.9411	0.000147551	0.127945	161	30	1	0.0833333	100.687	84.8567	560	1.22292	1.8539	NA
17	20076869	rs11654707	ALC:ATF/SPB/LM:VERS/R	7.58999	2.57047e-08	439.326	6.23338e-05	1.53484	175	16	1	0.046875	95.6158	126.471	560	1.33142	0.999113	NA
17	20076869	rs11654707	ALC:ATF/SPB/LM:VERS/CD	7.19911	6.32247e-08	68.9566	8.18502e-05	0.495437	175	16	1	0.046875	95.6158	126.471	560	1.33142	0.999113	NA
17	20636019	rs11655547	ALC:ATF/SPB/LM:VERS/R	7.58999	2.57047e-08	439.326	6.23338e-05	1.53484	181	10	1	0.03125	98.5226	92.37	560	1.24544	1.75565	NA
17	20636019	rs11655547	ALC:ATF/SPB/LM:VERS/CD	6.76839	1.70455e-07	55.2003	0.000289757	0.389506	181	10	1	0.03125	98.5226	92.37	560	1.24544	1.75565	NA
17	56541160	rs11867294	ALC:ATF/SPB/LM:VERS/R	7.58999	2.57047e-08	439.326	6.23338e-05	1.53484	181	10	1	0.03125	97.0845	118.4	560	1.27661	1.08909	NA
17	56541160	rs11867294	ALC:ATF/SPB/LM:VERS/CD	6.75883	1.74247e-07	72.106	0.00030678	0.47293	181	10	1	0.03125	97.0845	118.4	560	1.27661	1.08909	NA
18	11984243	rs57967783	ALC:ATF/SPB/LM:VERS/R	7.58999	2.57047e-08	439.326	6.23338e-05	1.53484	178	13	1	0.0390625	100.032	73.1231	560	1.25222	2.18787	NA
18	11984243	rs57967783	ALC:ATF/SPB/LM:VERS/CD	6.96643	1.08037e-07	35.5685	0.000146705	0.289494	178	13	1	0.0390625	100.032	73.1231	560	1.25222	2.18787	NA
18	11987273	rs7506045	ALC:ATF/SPB/LM:VERS/R	7.58999	2.57047e-08	439.326	6.23338e-05	1.53484	176	15	1	0.0442708	100.755	68.2267	560	1.25955	1.94281	NA
18	11987273	rs7506045	ALC:ATF/SPB/LM:VERS/CD	7.08938	8.13996e-08	27.3875	9.48003e-05	0.236584	176	15	1	0.0442708	100.755	68.2267	560	1.25955	1.94281	NA
18	11989437	rs653073	ALC:ATF/SPB/LM:VERS/R	7.58999	2.57047e-08	439.326	6.23338e-05	1.53484	136	55	1	0.148438	99.7404	94.3927	560	1.25976	1.25739	NA
18	11989437	rs653073	ALC:ATF/SPB/LM:VERS/CD	6.71821	1.91334e-07	16.8106	0.000341481	0.160502	136	55	1	0.148438	99.7404	94.3927	560	1.25976	1.25739	NA
18	13387814	rs12956452	ALC:ATF/SPB/LM:VERS/R	7.58999	2.57047e-08	439.326	6.23338e-05	1.53484	178	13	1	0.0390625	96.5843	120.33	560	1.24902	1.4175	NA
18	13387814	rs12956452	ALC:ATF/SPB/LM:VERS/CD	7.27509	5.3078e-08	80.715	6.3461e-05	0.572891	178	13	1	0.0390625	96.5843	120.33	560	1.24902	1.4175	NA
18	45620185	rs4890290	ALC:ATF/SPB/LM:VERS/R	7.58999	2.57047e-08	439.326	6.23338e-05	1.53484	165	26	1	0.0729167	100.281	84.9962	560	1.22702	1.88143	NA
18	45620185	rs4890290	ALC:ATF/SPB/LM:VERS/CD	7.08732	8.1787e-08	12.9266	0.000103543	0.114587	165	26	1	0.0729167	100.281	84.9962	560	1.22702	1.88143	NA
18	45629419	rs4890292	ALC:ATF/SPB/LM:VERS/R	7.58999	2.57047e-08	439.326	6.23338e-05	1.53484	168	23	1	0.0651042	99.5178	88.5783	560	1.22522	1.90621	NA
18	45629419	rs4890292	ALC:ATF/SPB/LM:VERS/CD	6.90694	1.23898e-07	20.751	0.000182946	0.178232	168	23	1	0.0651042	99.5178	88.5783	560	1.22522	1.90621	NA
18	47798213	rs4939972	ALC:ATF/SPB/LM:VERS/R	7.58999	2.57047e-08	439.326	6.23338e-05	1.53484	181	10	1	0.03125	97.1071	117.99	560	1.25469	1.34405	NA
18	47798213	rs4939972	ALC:ATF/SPB/LM:VERS/CD	7.00714	9.83684e-08	84.7303	0.000135218	0.567377	181	10	1	0.03125	97.1071	117.99	560	1.25469	1.34405	NA
18	47859763	rs78532325	ALC:ATF/SPB/LM:VERS/R	7.58999	2.57047e-08	439.326	6.23338e-05	1.53484	181	10	1	0.03125	97.1071	117.99	560	1.25469	1.34405	NA
18	47859763	rs78532325	ALC:ATF/SPB/LM:VERS/CD	7.00714	9.83684e-08	84.7303	0.000135218	0.567377	181	10	1	0.03125	97.1071	117.99	560	1.25469	1.34405	NA
18	47955117	rs58825872	ALC:ATF/SPB/LM:VERS/R	7.58999	2.57047e-08	439.326	6.23338e-05	1.53484	179	12	1	0.0364583	96.6161	121.833	560	1.24807	1.44831	NA
18	47955117	rs58825872	ALC:ATF/SPB/LM:VERS/CD	7.13713	7.29239e-08	80.1425	9.90449e-05	0.553783	179	12	1	0.0364583	96.6161	121.833	560	1.24807	1.44831	NA
18	71262277	rs117054899	ALC:ATF/SPB/LM:VERS/R	7.58999	2.57047e-08	439.326	6.23338e-05	1.53484	186	5	1	0.0182292	98.3134	94	560	1.24809	3.08903	NA
18	71262277	rs117054899	ALC:ATF/SPB/LM:VERS/CD	6.71544	1.92557e-07	97.5505	0.000343629	0.570536	186	5	1	0.0182292	98.3134	94	560	1.24809	3.08903	NA
19	5873717	rs8108862	ALC:ATF/SPB/LM:VERS/R	7.58999	2.57047e-08	439.326	6.23338e-05	1.53484	163	28	1	0.078125	99.6875	89.5439	560	1.24965	1.35264	NA
19	5873717	rs8108862	ALC:ATF/SPB/LM:VERS/CD	6.72348	1.89026e-07	27.7651	0.000334044	0.251623	163	28	1	0.078125	99.6875	89.5439	560	1.24965	1.35264	NA
19	8914195	rs62118272	ALC:ATF/SPB/LM:VERS/R	7.58999	2.57047e-08	439.326	6.23338e-05	1.53484	181	10	1	0.03125	98.1154	99.74	560	1.24864	1.49121	NA
19	8914195	rs62118272	ALC:ATF/SPB/LM:VERS/CD	6.71505	1.92731e-07	64.0065	0.000344769	0.445413	181	10	1	0.03125	98.1154	99.74	560	1.24864	1.49121	NA
19	29881488	rs335017	ALC:ATF/SPB/LM:VERS/R	7.58999	2.57047e-08	439.326	6.23338e-05	1.53484	169	22	1	0.0625	99.1436	90.9559	560	1.26486	1.21232	NA
19	29881488	rs335017	ALC:ATF/SPB/LM:VERS/CD	6.73746	1.83037e-07	31.2294	0.000321815	0.268024	169	22	1	0.0625	99.1436	90.9559	560	1.26486	1.21232	NA
19	38611239	rs2287731	ALC:ATF/SPB/LM:VERS/R	7.58999	2.57047e-08	439.326	6.23338e-05	1.53484	177	14	1	0.0416667	96.3124	122.071	560	1.30805	1.01263	NA
19	38611239	rs2287731	ALC:ATF/SPB/LM:VERS/CD	6.93458	1.16258e-07	66.6365	0.000182929	0.469598	177	14	1	0.0416667	96.3124	122.071	560	1.30805	1.01263	NA
19	38616284	rs2303041	ALC:ATF/SPB/LM:VERS/R	7.58999	2.57047e-08	439.326	6.23338e-05	1.53484	177	14	1	0.0416667	96.3124	122.071	560	1.30805	1.01263	NA
19	38616284	rs2303041	ALC:ATF/SPB/LM:VERS/CD	6.93458	1.16258e-07	66.6365	0.000182929	0.469598	177	14	1	0.0416667	96.3124	122.071	560	1.30805	1.01263	NA
19	45220802	rs74444899	ALC:ATF/SPB/LM:VERS/R	7.58999	2.57047e-08	439.326	6.23338e-05	1.53484	188	3	1	0.0130208	98.8154	59.6667	560	1.26172	6.42159	NA
19	45220802	rs74444899	ALC:ATF/SPB/LM:VERS/CD	6.97378	1.06224e-07	105.423	0.000146514	0.559622	188	3	1	0.0130208	98.8154	59.6667	560	1.26172	6.42159	NA
19	57021184	rs11880181	ALC:ATF/SPB/LM:VERS/R	7.58999	2.57047e-08	439.326	6.23338e-05	1.53484	156	35	1	0.0963542	101.426	83.822	560	1.21329	2.00116	NA
19	57021184	rs11880181	ALC:ATF/SPB/LM:VERS/CD	6.85584	1.39368e-07	15.4381	0.000210062	0.147155	156	35	1	0.0963542	101.426	83.822	560	1.21329	2.00116	NA
20	3801697	rs11570007	ALC:ATF/SPB/LM:VERS/R	7.58999	2.57047e-08	439.326	6.23338e-05	1.53484	179	12	1	0.0364583	98.262	97.2833	560	1.25801	1.25879	NA
20	3801697	rs11570007	ALC:ATF/SPB/LM:VERS/CD	6.72575	1.8804e-07	60.4665	0.000333119	0.447749	179	12	1	0.0364583	98.262	97.2833	560	1.25801	1.25879	NA
20	51428908	rs7265691	ALC:ATF/SPB/LM:VERS/R	7.58999	2.57047e-08	439.326	6.23338e-05	1.53484	157	34	1	0.09375	100.61	87.0735	560	1.23897	1.45689	NA
20	51428908	rs7265691	ALC:ATF/SPB/LM:VERS/CD	6.87628	1.32959e-07	14.4906	0.000203034	0.134529	157	34	1	0.09375	100.61	87.0735	560	1.23897	1.45689	NA
20	51437411	rs117218691	ALC:ATF/SPB/LM:VERS/R	7.58999	2.57047e-08	439.326	6.23338e-05	1.53484	185	6	1	0.0208333	97.9583	105.667	560	1.25737	1.27113	NA
20	51437411	rs117218691	ALC:ATF/SPB/LM:VERS/CD	6.71527	1.92632e-07	88.2234	0.000344203	0.525784	185	6	1	0.0208333	97.9583	105.667	560	1.25737	1.27113	NA
20	56757598	rs7268610	ALC:ATF/SPB/LM:VERS/R	7.58999	2.57047e-08	439.326	6.23338e-05	1.53484	160	31	1	0.0859375	96.3224	107.894	560	1.25121	1.30233	NA
20	56757598	rs7268610	ALC:ATF/SPB/LM:VERS/CD	6.7702	1.69744e-07	33.6759	0.000299501	0.284924	160	31	1	0.0859375	96.3224	107.894	560	1.25121	1.30233	NA
21	27413331	rs239659	ALC:ATF/SPB/LM:VERS/R	7.58999	2.57047e-08	439.326	6.23338e-05	1.53484	157	34	1	0.09375	96.4993	106.056	560	1.23898	1.35286	NA
21	27413331	rs239659	ALC:ATF/SPB/LM:VERS/CD	6.80799	1.55601e-07	33.6689	0.000273589	0.292272	157	34	1	0.09375	96.4993	106.056	560	1.23898	1.35286	NA
21	35919133	rs112461706	ALC:ATF/SPB/LM:VERS/R	7.58999	2.57047e-08	439.326	6.23338e-05	1.53484	182	9	1	0.0286458	99.6576	68.7333	560	1.25808	2.20897	NA
21	35919133	rs112461706	ALC:ATF/SPB/LM:VERS/CD	6.85014	1.41208e-07	55.6028	0.000208803	0.415836	182	9	1	0.0286458	99.6576	68.7333	560	1.25808	2.20897	NA
21	46152973	rs61735836	ALC:ATF/SPB/LM:VERS/R	7.58999	2.57047e-08	439.326	6.23338e-05	1.53484	177	14	1	0.0416667	99.3796	83.2929	560	1.26102	1.27799	NA
21	46152973	rs61735836	ALC:ATF/SPB/LM:VERS/CD	7.00762	9.8261e-08	31.2017	0.00014389	0.24479	177	14	1	0.0416667	99.3796	83.2929	560	1.26102	1.27799	NA
22	44158899	rs139072	ALC:ATF/SPB/LM:VERS/R	7.58999	2.57047e-08	439.326	6.23338e-05	1.53484	157	34	1	0.09375	97.7248	100.397	560	1.36174	0.977566	NA
22	44158899	rs139072	ALC:ATF/SPB/LM:VERS/CD	6.74685	1.79122e-07	30.5049	0.000301426	0.271107	157	34	1	0.09375	97.7248	100.397	560	1.36174	0.977566	NA
2	204590915	rs75158148	ALC:ATF/SPB:M/GLM:VERS/CD	7.5846	3.4459e-07	103.2	2.60257e-08	0.724659	148	18	0	0.0542169	94.3121	200.872	NA	1.58978	1.07633	NA
2	204590915	rs75158148	ALC:ATF/SPB:M/GLM:VERS/D	7.5846	3.4459e-07	103.2	2.60257e-08	0.724659	148	18	0	0.0542169	94.3121	200.872	NA	1.58978	1.07633	NA
2	204590915	rs75158148	ALC:ATF/SPB/GLM:VERS/CD	7.51741	2.96859e-07	97.8559	3.038e-08	0.719086	173	19	0	0.0494792	90.6392	191.353	NA	1.57852	1.02848	NA
2	204590915	rs75158148	ALC:ATF/SPB/GLM:VERS/D	7.51741	2.96859e-07	97.8559	3.038e-08	0.719086	173	19	0	0.0494792	90.6392	191.353	NA	1.57852	1.02848	NA
2	204590915	rs75158148	ALC:ATF/SPB/LM:VERS/CD	6.52745	2.96859e-07	97.8559	3.038e-08	0.719086	173	19	0	0.0494792	90.6392	191.353	NA	1.57852	1.02848	NA
2	204590915	rs75158148	ALC:ATF/SPB/LM:VERS/D	6.52745	2.96859e-07	97.8559	3.038e-08	0.719086	173	19	0	0.0494792	90.6392	191.353	NA	1.57852	1.02848	NA
2	204590915	rs75158148	ALC:ATF/SPB/LM:VERS/A	6.06033	8.7031e-07	92.6907	9.73936e-07	0.663676	173	19	0	0.0494792	90.6392	191.353	NA	1.57852	1.02848	NA
2	204590915	rs75158148	ALC:ATF/SPB/GLM:VERS/A	6.01147	8.7031e-07	92.6907	9.73936e-07	0.663676	173	19	0	0.0494792	90.6392	191.353	NA	1.57852	1.02848	NA
2	204590915	rs75158148	ALC:ATF/SPB:M/GLM:VERS/A	5.9984	1.12884e-06	97.2096	1.0037e-06	0.663064	148	18	0	0.0542169	94.3121	200.872	NA	1.58978	1.07633	NA
9	131642166	rs111458175	ALC:ATF/SPB/LM:VERS/R	7.5809	2.6248e-08	440.227	6.41879e-05	1.54234	182	7	1	0.0236842	96.4505	129.9	560	1.26946	1.06732	NA
9	131642166	rs111458175	ALC:ATF/SPB/LM:VERS/CD	6.92145	1.19825e-07	99.5241	0.000200057	0.590799	182	7	1	0.0236842	96.4505	129.9	560	1.26946	1.06732	NA
19	38584752	rs10408694	ALC:ATF/SPB/LM:VERS/R	7.58064	2.62638e-08	438.182	6.20852e-05	1.52541	175	15	1	0.0445026	96.0131	128.933	560	1.30208	1.12319	NA
19	38584752	rs10408694	ALC:ATF/SPB/LM:VERS/CD	7.00095	9.97816e-08	66.5315	0.000158701	0.462216	175	15	1	0.0445026	96.0131	128.933	560	1.30208	1.12319	NA
18	76500335	rs62110945	ALC:PACS/SPB/LM/R	7.00123	9.97165e-08	11.6862	2.34019e-05	1.45374	142	46	4	0.140625	3.52113	3.69565	15.25	0.839343	1.11345	1.44801
18	76500335	rs62110945	ALC:PACS/SPB/LM/CD	6.15916	6.93166e-07	1.84579	0.000136757	0.417877	142	46	4	0.140625	3.52113	3.69565	15.25	0.839343	1.11345	1.44801
6	34523236	rs73746675	ALC:VAS/SPB/LM/CD	7.57869	2.63821e-08	1.88494	2.26949e-06	0.796796	173	18	1	0.0520833	1.39306	2.94444	8	1.06322	1.19654	NA
6	34523236	rs73746675	ALC:VAS/SPB/LM/A	7.54757	2.83421e-08	1.98022	5.16362e-07	0.853261	173	18	1	0.0520833	1.39306	2.94444	8	1.06322	1.19654	NA
6	34523236	rs73746675	ALC:VAS/SPB/GLM/A	6.28705	2.83421e-08	1.98022	5.16362e-07	0.853261	173	18	1	0.0520833	1.39306	2.94444	8	1.06322	1.19654	NA
6	34523236	rs73746675	ALC:VAS/SPB/LM/D	5.973	1.06414e-06	1.81746	3.46483e-06	0.83493	173	18	1	0.0520833	1.39306	2.94444	8	1.06322	1.19654	NA
6	34523236	rs73746675	ALC:VAS/SPB/GLM/CD	5.64407	2.63821e-08	1.88494	2.26949e-06	0.796796	173	18	1	0.0520833	1.39306	2.94444	8	1.06322	1.19654	NA
6	34523236	rs73746675	ALC:VAS/SPB/GLM/D	5.46032	1.06414e-06	1.81746	3.46483e-06	0.83493	173	18	1	0.0520833	1.39306	2.94444	8	1.06322	1.19654	NA
1	2957747	rs141625056	ALC:PACS/SPB:M/GLM/CD	5.64623	2.64551e-08	10.5963	2.25824e-06	1.41419	161	5	0	0.0150602	3.40373	14	NA	0.953993	1.16667	NA
1	2957747	rs141625056	ALC:PACS/SPB:M/GLM/D	5.64623	2.64551e-08	10.5963	2.25824e-06	1.41419	161	5	0	0.0150602	3.40373	14	NA	0.953993	1.16667	NA
11	45733659	rs753199	ALC:PACS/SPB:M/GLM/CD	5.41128	2.64551e-08	10.5963	3.879e-06	1.41419	161	5	0	0.0150602	3.40373	14	NA	0.922804	1.34096	NA
11	45733659	rs753199	ALC:PACS/SPB:M/GLM/D	5.41128	2.64551e-08	10.5963	3.879e-06	1.41419	161	5	0	0.0150602	3.40373	14	NA	0.922804	1.34096	NA
1	223411377	rs825130	ALC:SAI/SPB:M/GLM/A	7.57603	5.87114e-08	5.60105	2.65442e-08	0.138946	57	65	44	0.460843	35.4386	41.3231	44.5455	4.5242	5.09726	4.00899
1	223411377	rs825130	ALC:SAI/SPB/GLM/A	6.27232	8.2478e-07	4.6399	5.34166e-07	0.115536	62	75	55	0.481771	35.9677	41.0533	43.5273	4.16554	5.16681	4.2249
1	223411377	rs825130	ALC:SAI/SPB:M/GLM/CD	6.17547	2.72696e-06	4.6212	6.67615e-07	0.114588	57	65	44	0.460843	35.4386	41.3231	44.5455	4.5242	5.09726	4.00899
1	223411377	rs825130	ALC:SAI/SPB:M/GLM/D	6.16498	2.33176e-06	7.18526	6.83951e-07	0.184613	57	65	44	0.460843	35.4386	41.3231	44.5455	4.5242	5.09726	4.00899
1	223411377	rs825130	ALC:SAI/SPB/LM/A	6.08366	8.2478e-07	4.6399	5.34166e-07	0.115536	62	75	55	0.481771	35.9677	41.0533	43.5273	4.16554	5.16681	4.2249
19	8915746	rs117968462	ALC:ATF/SPB/LM:VERS/R	7.57388	2.6676e-08	439.761	6.40627e-05	1.53846	180	10	1	0.0314136	97.7772	99.74	560	1.24296	1.49121	NA
19	8915746	rs117968462	ALC:ATF/SPB/LM:VERS/CD	6.6994	1.99803e-07	64.2354	0.000353932	0.447586	180	10	1	0.0314136	97.7772	99.74	560	1.24296	1.49121	NA
21	23838969	rs71329944	ALC:ATF/SPB/LM:VERS/R	7.57306	2.67264e-08	438.284	6.27473e-05	1.52625	163	27	1	0.0759162	99.7233	91.5704	560	1.24421	1.44337	NA
21	23838969	rs71329944	ALC:ATF/SPB/LM:VERS/CD	6.84512	1.4285e-07	18.8459	0.00021595	0.164132	163	27	1	0.0759162	99.7233	91.5704	560	1.24421	1.44337	NA
6	54751933	rs71560858	ALC:ATF/SPB/LM:VERS/R	7.5717	2.68101e-08	439.326	6.20709e-05	1.53484	169	21	1	0.0602094	98.556	98.9105	560	1.33633	0.917886	NA
6	54751933	rs71560858	ALC:ATF/SPB/LM:VERS/CD	6.78769	1.63045e-07	47.9907	0.000236389	0.402556	169	21	1	0.0602094	98.556	98.9105	560	1.33633	0.917886	NA
6	1287422	rs17259991	ALC:ATF/SPB/LM:VERS/R	7.57076	2.68685e-08	438.318	6.29526e-05	1.52653	179	11	1	0.0340314	99.2089	87.8091	560	1.26755	1.1784	NA
6	1287422	rs17259991	ALC:ATF/SPB/LM:VERS/CD	6.91975	1.20297e-07	42.3595	0.000183304	0.306159	179	11	1	0.0340314	99.2089	87.8091	560	1.26755	1.1784	NA
8	21636370	rs66518050	ALC:ATF/SPB/LM:VERS/R	7.57076	2.68685e-08	438.318	6.29526e-05	1.52653	171	19	1	0.0549738	100.386	82.0105	560	1.23505	2.56675	NA
8	21636370	rs66518050	ALC:ATF/SPB/LM:VERS/CD	6.82256	1.50465e-07	28.8056	0.000219352	0.24842	171	19	1	0.0549738	100.386	82.0105	560	1.23505	2.56675	NA
1	14459773	rs12122476	ALC:ATF/SPB/LM:VERS/R	7.56913	2.69694e-08	439.326	6.41659e-05	1.53484	157	33	1	0.091623	101.58	81.1606	560	1.2144	2.09928	NA
1	14459773	rs12122476	ALC:ATF/SPB/LM:VERS/CD	7.10055	7.93323e-08	8.44898	9.08048e-05	0.0798497	157	33	1	0.091623	101.58	81.1606	560	1.2144	2.09928	NA
5	9163551	rs77385289	ALC:ATF/SPB/LM:VERS/R	7.56254	2.73815e-08	439.326	6.47482e-05	1.53484	172	18	1	0.052356	96.0331	117.811	560	1.33016	0.967126	NA
5	9163551	rs77385289	ALC:ATF/SPB/LM:VERS/CD	7.09543	8.02732e-08	62.8274	9.28567e-05	0.476948	172	18	1	0.052356	96.0331	117.811	560	1.33016	0.967126	NA
6	19440899	rs17819890	ALC:ATF/SPB/LM:VERS/R	7.56225	2.74001e-08	439.326	6.37234e-05	1.53484	184	5	1	0.0184211	99.0728	60.58	560	1.25809	1.9536	NA
6	19440899	rs17819890	ALC:ATF/SPB/LM:VERS/CD	6.921	1.19951e-07	78.6637	0.000155074	0.49177	184	5	1	0.0184211	99.0728	60.58	560	1.25809	1.9536	NA
5	92818770	rs17668548	ALC:ATF/SPB/LM:VERS/R	7.56045	2.75135e-08	438.318	6.15576e-05	1.52653	178	11	1	0.0342105	99.123	97.0909	560	1.25366	1.68375	NA
5	92818770	rs17668548	ALC:ATF/SPB/LM:VERS/CD	6.69886	2.00053e-07	55.5044	0.000324328	0.396013	178	11	1	0.0342105	99.123	97.0909	560	1.25366	1.68375	NA
11	3052149	rs3816350	ALC:ATF/SPB/LM:VERS/R	7.55775	2.76853e-08	438.557	6.41684e-05	1.52849	149	41	1	0.112565	97.8745	100.488	560	1.21475	1.4633	NA
11	3052149	rs3816350	ALC:ATF/SPB/LM:VERS/CD	6.7179	1.91471e-07	26.9928	0.000324147	0.244938	149	41	1	0.112565	97.8745	100.488	560	1.21475	1.4633	NA
6	2731197	rs35958510	ALC:ATF/SPB/LM:VERS/R	7.55775	2.76853e-08	438.557	6.41684e-05	1.52849	174	16	1	0.0471204	95.8291	126.814	560	1.30272	1.09977	NA
6	2731197	rs35958510	ALC:ATF/SPB/LM:VERS/CD	7.26797	5.39543e-08	71.2937	6.42131e-05	0.512722	174	16	1	0.0471204	95.8291	126.814	560	1.30272	1.09977	NA
15	37254949	rs12917515	ALC:ATF/SPB/LM:VERS/R	7.55751	2.77008e-08	220.284	3.56966e-07	1.18245	149	39	4	0.122396	92.9026	107.764	317.75	1.33985	1.35436	1.19456
15	37254949	rs12917515	ALC:ATF/SPB/LM:VERS/CD	6.90741	1.23762e-07	45.3325	1.23645e-06	0.382136	149	39	4	0.122396	92.9026	107.764	317.75	1.33985	1.35436	1.19456
15	37254949	rs12917515	ALC:ATF/SPB/GLM:VERS/R	6.44737	2.77008e-08	220.284	3.56966e-07	1.18245	149	39	4	0.122396	92.9026	107.764	317.75	1.33985	1.35436	1.19456
15	37254949	rs12917515	ALC:ATF/SPB:M/GLM:VERS/R	5.9572	1.73468e-07	213.972	1.10358e-06	1.12046	129	33	4	0.123494	96.241	117.812	317.75	1.33289	1.43452	1.19456
15	37254949	rs12917515	ALC:ATF/SPB/GLM:VERS/CD	5.90782	1.23762e-07	45.3325	1.23645e-06	0.382136	149	39	4	0.122396	92.9026	107.764	317.75	1.33985	1.35436	1.19456
15	37254949	rs12917515	ALC:ATF/SPB:M/GLM:VERS/CD	5.57265	5.69403e-07	51.2828	2.67518e-06	0.401394	129	33	4	0.123494	96.241	117.812	317.75	1.33289	1.43452	1.19456
8	125077915	rs72720522	ALC:ATF/SPB/LM:VERS/R	7.55597	2.7799e-08	439.432	6.51398e-05	1.53572	166	24	1	0.0680628	100.954	77.8292	560	1.22185	3.26682	NA
8	125077915	rs72720522	ALC:ATF/SPB/LM:VERS/CD	7.03211	9.2874e-08	15.599	0.000105504	0.142733	166	24	1	0.0680628	100.954	77.8292	560	1.22185	3.26682	NA
9	103727130	rs117659148	ALC:ATF/SPB/LM:VERS/R	7.55583	2.7808e-08	439.693	6.34055e-05	1.53789	176	13	1	0.0394737	99.2113	86.6	560	1.2432	1.87655	NA
9	103727130	rs117659148	ALC:ATF/SPB/LM:VERS/CD	6.71946	1.90783e-07	46.4983	0.000308172	0.361934	176	13	1	0.0394737	99.2113	86.6	560	1.2432	1.87655	NA
3	132895402	rs55716736	ALC:ATF/SPB/LM:VERS/R	7.555	2.78609e-08	439.326	6.52741e-05	1.53484	152	38	1	0.104712	98.4269	97.3526	560	1.22736	1.39357	NA
3	132895402	rs55716736	ALC:ATF/SPB/LM:VERS/CD	6.6898	2.04268e-07	20.6641	0.000348221	0.186658	152	38	1	0.104712	98.4269	97.3526	560	1.22736	1.39357	NA
10	52063288	rs7917737	ALC:ATF/SPB/LM:VERS/R	7.555	2.78609e-08	439.326	6.52741e-05	1.53484	179	11	1	0.0340314	97.0843	116.564	560	1.28231	1.03254	NA
10	52063288	rs7917737	ALC:ATF/SPB/LM:VERS/CD	6.78261	1.64962e-07	71.6214	0.000265195	0.486829	179	11	1	0.0340314	97.0843	116.564	560	1.28231	1.03254	NA
21	17438477	rs13048555	ALC:ATF/SPB/LM:VERS/R	7.55437	2.79013e-08	439.326	6.48007e-05	1.53484	168	22	1	0.0628272	98.7916	95.2182	560	1.32615	0.922914	NA
21	17438477	rs13048555	ALC:ATF/SPB/LM:VERS/CD	6.68091	2.08493e-07	35.2529	0.00035887	0.297963	168	22	1	0.0628272	98.7916	95.2182	560	1.32615	0.922914	NA
3	67988022	rs17047112	ALC:ATF/SPB/LM:VERS/R	7.55326	2.79733e-08	439.326	6.51178e-05	1.53484	176	14	1	0.0418848	98.8732	91.4	560	1.24972	1.4048	NA
3	67988022	rs17047112	ALC:ATF/SPB/LM:VERS/CD	6.68771	2.05252e-07	54.8849	0.000352143	0.433235	176	14	1	0.0418848	98.8732	91.4	560	1.24972	1.4048	NA
20	51478971	rs117433983	ALC:ATF/SPB/LM:VERS/R	7.55326	2.79733e-08	439.326	6.51178e-05	1.53484	186	4	1	0.0157068	97.6413	130	560	1.25324	1.45091	NA
20	51478971	rs117433983	ALC:ATF/SPB/LM:VERS/CD	6.69326	2.02648e-07	116.667	0.000351622	0.597148	186	4	1	0.0157068	97.6413	130	560	1.25324	1.45091	NA
20	51478971	rs117433983	ALC:ATF/SPB/LM:VERS/A	5.32774	4.70178e-06	152.874	9.28011e-05	0.819376	186	4	1	0.0157068	97.6413	130	560	1.25324	1.45091	NA
5	8537673	rs74945534	ALC:ATF/SPB/LM:VERS/R	7.55216	2.80442e-08	439.318	6.53297e-05	1.53478	175	15	1	0.0445026	97.0897	109.707	560	1.33051	0.87026	NA
5	8537673	rs74945534	ALC:ATF/SPB/LM:VERS/CD	6.69976	1.99637e-07	52.7697	0.000327429	0.389568	175	15	1	0.0445026	97.0897	109.707	560	1.33051	0.87026	NA
12	66747315	rs74235709	ALC:ATF/SPB/LM:VERS/R	7.55216	2.80442e-08	439.318	6.53297e-05	1.53478	167	23	1	0.065445	100.451	80.9087	560	1.27242	1.14985	NA
12	66747315	rs74235709	ALC:ATF/SPB/LM:VERS/CD	6.87877	1.32199e-07	21.0308	0.000196589	0.189154	167	23	1	0.065445	100.451	80.9087	560	1.27242	1.14985	NA
7	154769478	rs56091483	ALC:ATF/SPB/LM:VERS/R	7.55125	2.8103e-08	439.284	6.53682e-05	1.5345	162	28	1	0.078534	99.5494	89.7246	560	1.20716	2.00373	NA
7	154769478	rs56091483	ALC:ATF/SPB/LM:VERS/CD	6.73737	1.83077e-07	22.5634	0.000288813	0.202166	162	28	1	0.078534	99.5494	89.7246	560	1.20716	2.00373	NA
2	85085266	rs80339360	ALC:ATF/SPB/LM:VERS/R	7.54884	2.8259e-08	439.159	6.54368e-05	1.53346	175	15	1	0.0445026	97.1257	110.22	560	1.25299	1.28028	NA
2	85085266	rs80339360	ALC:ATF/SPB/LM:VERS/CD	6.76315	1.72525e-07	57.987	0.000285226	0.43137	175	15	1	0.0445026	97.1257	110.22	560	1.25299	1.28028	NA
11	4680356	rs2292157	ALC:ATF/SPB/LM:VERS/R	7.54821	2.83003e-08	438.932	6.52677e-05	1.53158	181	9	1	0.0287958	99.558	72.2556	560	1.25284	2.2193	NA
11	4680356	rs2292157	ALC:ATF/SPB/LM:VERS/CD	6.90391	1.24765e-07	50.3096	0.000167444	0.367779	181	9	1	0.0287958	99.558	72.2556	560	1.25284	2.2193	NA
5	106787357	rs1438254	ALC:ATF/SPB/LM:VERS/R	7.54788	2.83216e-08	439.011	6.53699e-05	1.53224	169	21	1	0.0602094	96.7786	109.89	560	1.24784	1.32333	NA
5	106787357	rs1438254	ALC:ATF/SPB/LM:VERS/CD	6.68265	2.07659e-07	39.8657	0.000354627	0.311273	169	21	1	0.0602094	96.7786	109.89	560	1.24784	1.32333	NA
5	30659461	rs1946758	ALC:ATF/SPB/LM:VERS/R	7.53821	2.89596e-08	439.761	6.71083e-05	1.53846	158	31	1	0.0868421	99.8632	87.9323	560	1.26522	1.18149	NA
5	30659461	rs1946758	ALC:ATF/SPB/LM:VERS/CD	6.67484	2.11424e-07	25.7573	0.000361904	0.239556	158	31	1	0.0868421	99.8632	87.9323	560	1.26522	1.18149	NA
14	49206604	rs118007544	ALC:ATF/SPB:F/GLM:VERS/A	6.7502	4.46104e-08	113.632	1.77746e-07	1.08452	24	1	1	0.0576923	58.8917	143	186	2.18381	NA	NA
14	49206604	rs118007544	ALC:VAS/SPB:F/GLM/A	6.04703	2.90359e-08	5.30612	8.97359e-07	1.41889	24	1	1	0.0576923	1.625	5	8	1.27051	NA	NA
14	49366189	rs74887377	ALC:ATF/SPB:F/GLM:VERS/A	6.7502	4.46104e-08	113.632	1.77746e-07	1.08452	24	1	1	0.0576923	58.8917	143	186	2.18381	NA	NA
14	49366189	rs74887377	ALC:VAS/SPB:F/GLM/A	6.04703	2.90359e-08	5.30612	8.97359e-07	1.41889	24	1	1	0.0576923	1.625	5	8	1.27051	NA	NA
14	49366189	rs74887377	ALC:PACS/SPB/LM/A	5.34343	4.53489e-06	4.36734	3.4556e-05	0.802775	172	17	3	0.0598958	3.41279	6.23529	12.6667	0.88382	0.834597	2.80904
2	234587940	rs955781	ALC:VAS/SPB:F/GLM/A	6.04703	2.90359e-08	5.30612	8.97359e-07	1.41889	24	1	1	0.0576923	1.625	5	8	1.27051	NA	NA
12	19773317	rs79998746	ALC:ATF/SPB/LM:VERS/R	7.53659	2.90674e-08	438.92	6.62739e-05	1.53148	182	7	1	0.0236842	98.6543	85.0286	560	1.24612	1.99189	NA
12	19773317	rs79998746	ALC:ATF/SPB/LM:VERS/CD	6.75146	1.77231e-07	68.8413	0.000272519	0.449022	182	7	1	0.0236842	98.6543	85.0286	560	1.24612	1.99189	NA
3	193525576	rs77553010	ALC:ATF/SPB/LM:VERS/R	7.53157	2.94057e-08	439.448	6.71979e-05	1.53586	174	15	1	0.0447368	98.8344	87.14	560	1.25391	1.22143	NA
3	193525576	rs77553010	ALC:ATF/SPB/LM:VERS/CD	6.67669	2.10528e-07	43.6569	0.00035688	0.352719	174	15	1	0.0447368	98.8344	87.14	560	1.25391	1.22143	NA
9	27623560	rs3913107	ALC:ATF/SPB/LM:VERS/R	7.52986	2.95213e-08	437.828	6.57754e-05	1.5225	155	34	1	0.0947368	99.6271	94.2085	560	1.27094	1.21074	NA
9	27623560	rs3913107	ALC:ATF/SPB/LM:VERS/CD	6.65841	2.19579e-07	24.5974	0.000363152	0.223109	155	34	1	0.0947368	99.6271	94.2085	560	1.27094	1.21074	NA
15	24595848	rs118015474	ALC:ATF/SPB:M/GLM:VERS/CD	7.52909	9.71598e-08	140.49	2.95741e-08	0.907322	156	10	0	0.0301205	97.5775	235.18	NA	1.40387	1.16797	NA
15	24595848	rs118015474	ALC:ATF/SPB:M/GLM:VERS/D	7.52909	9.71598e-08	140.49	2.95741e-08	0.907322	156	10	0	0.0301205	97.5775	235.18	NA	1.40387	1.16797	NA
15	24595848	rs118015474	ALC:ATF/SPB:M/GLM:VERS/A	6.34617	2.52454e-07	136.089	4.50643e-07	0.863241	156	10	0	0.0301205	97.5775	235.18	NA	1.40387	1.16797	NA
15	24595848	rs118015474	ALC:ATF/SPB/GLM:VERS/CD	6.1538	1.22517e-06	114.601	7.0178e-07	0.793146	180	12	0	0.03125	93.3472	209.483	NA	1.39237	1.08829	NA
15	24595848	rs118015474	ALC:ATF/SPB/GLM:VERS/D	6.1538	1.22517e-06	114.601	7.0178e-07	0.793146	180	12	0	0.03125	93.3472	209.483	NA	1.39237	1.08829	NA
15	24595848	rs118015474	ALC:ATF/SPB/LM:VERS/CD	5.9118	1.22517e-06	114.601	7.0178e-07	0.793146	180	12	0	0.03125	93.3472	209.483	NA	1.39237	1.08829	NA
15	24595848	rs118015474	ALC:ATF/SPB/LM:VERS/D	5.9118	1.22517e-06	114.601	7.0178e-07	0.793146	180	12	0	0.03125	93.3472	209.483	NA	1.39237	1.08829	NA
15	24595848	rs118015474	ALC:ATF/SPB/LM:VERS/A	5.62017	2.3979e-06	110.889	5.02283e-06	0.754149	180	12	0	0.03125	93.3472	209.483	NA	1.39237	1.08829	NA
14	31488996	rs56152447	ALC:ATF/SPB/LM:VERS/R	7.52142	3.01008e-08	439.655	6.80373e-05	1.53758	163	25	1	0.0714286	93.6417	126.188	560	1.27531	1.24518	NA
14	31488996	rs56152447	ALC:ATF/SPB/LM:VERS/CD	7.29455	5.07516e-08	56.3852	6.89672e-05	0.437736	163	25	1	0.0714286	93.6417	126.188	560	1.27531	1.24518	NA
2	3112607	rs114837941	ALC:ATF/SPB/LM:VERS/R	7.52039	3.01726e-08	439.432	6.82308e-05	1.53572	170	19	1	0.0552632	97.2329	105.458	560	1.25178	1.24168	NA
2	3112607	rs114837941	ALC:ATF/SPB/LM:VERS/CD	6.71639	1.92138e-07	48.6359	0.000300604	0.386656	170	19	1	0.0552632	97.2329	105.458	560	1.25178	1.24168	NA
14	39868214	rs77208044	ALC:ATF/SPB:M/GLM:VERS/CD	6.5354	3.02464e-08	202.769	2.91475e-07	1.06066	161	5	0	0.0150602	99.5012	310.84	NA	1.36144	1.32409	NA
14	39868214	rs77208044	ALC:ATF/SPB:M/GLM:VERS/D	6.5354	3.02464e-08	202.769	2.91475e-07	1.06066	161	5	0	0.0150602	99.5012	310.84	NA	1.36144	1.32409	NA
14	39868214	rs77208044	ALC:ATF/SPB/LM:VERS/CD	6.00481	9.88978e-07	161.127	4.58267e-06	0.93892	186	6	0	0.015625	95.2962	265.2	NA	1.35643	1.11485	NA
14	39868214	rs77208044	ALC:ATF/SPB/LM:VERS/D	6.00481	9.88978e-07	161.127	4.58267e-06	0.93892	186	6	0	0.015625	95.2962	265.2	NA	1.35643	1.11485	NA
14	39868214	rs77208044	ALC:ATF/SPB/LM:VERS/A	5.78138	1.65431e-06	158.159	1.78192e-05	0.908991	186	6	0	0.015625	95.2962	265.2	NA	1.35643	1.11485	NA
14	39868214	rs77208044	ALC:ATF/SPB:M/GLM:VERS/A	5.73065	7.09132e-08	199.365	1.85931e-06	1.02749	161	5	0	0.0150602	99.5012	310.84	NA	1.36144	1.32409	NA
14	39868214	rs77208044	ALC:ATF/SPB/GLM:VERS/CD	5.33888	9.88978e-07	161.127	4.58267e-06	0.93892	186	6	0	0.015625	95.2962	265.2	NA	1.35643	1.11485	NA
14	39868214	rs77208044	ALC:ATF/SPB/GLM:VERS/D	5.33888	9.88978e-07	161.127	4.58267e-06	0.93892	186	6	0	0.015625	95.2962	265.2	NA	1.35643	1.11485	NA
15	97129902	rs79487017	ALC:ATF/SPB/LM:VERS/R	7.51252	3.07243e-08	439.011	6.84664e-05	1.53224	184	5	1	0.0184211	99.3099	59.254	560	1.25768	2.23266	NA
15	97129902	rs79487017	ALC:ATF/SPB/LM:VERS/CD	6.89576	1.27129e-07	77.5696	0.000154078	0.485702	184	5	1	0.0184211	99.3099	59.254	560	1.25768	2.23266	NA
16	86693101	rs1037000	ALC:ATF/SPB/LM:VERS/R	7.50985	3.09134e-08	439.057	6.85849e-05	1.53262	177	12	1	0.0368421	97.17	111.6	560	1.21537	2.39411	NA
16	86693101	rs1037000	ALC:ATF/SPB/LM:VERS/CD	6.64849	2.24649e-07	60.2115	0.000375232	0.419228	177	12	1	0.0368421	97.17	111.6	560	1.21537	2.39411	NA
2	24701371	rs74729311	ALC:ATF/SPB/LM:VERS/R	7.50763	3.10721e-08	439.326	6.65667e-05	1.53484	183	5	1	0.0185185	99.7251	66.64	560	1.26226	3.00026	NA
2	24701371	rs74729311	ALC:ATF/SPB/LM:VERS/CD	6.90882	1.23362e-07	76.8249	0.000148399	0.471058	183	5	1	0.0185185	99.7251	66.64	560	1.26226	3.00026	NA
9	71759278	rs2310024	ALC:VAS/SPB/LM/R	6.54206	2.8704e-07	2.56044	7.97911e-06	1.02196	114	68	10	0.229167	1.38596	1.52941	4	0.96104	1.07768	1.7693
9	71759278	rs2310024	ALC:VAS/SPB:M/GLM/R	5.91354	3.1298e-08	2.65385	1.22029e-06	1.08904	97	59	10	0.237952	1.25773	1.49153	4	0.978659	1.06042	1.7693
9	71759278	rs2310024	ALC:VAS/SPB/LM/CD	5.78967	1.62303e-06	0.673645	4.01202e-05	0.388757	114	68	10	0.229167	1.38596	1.52941	4	0.96104	1.07768	1.7693
9	71759278	rs2310024	ALC:VAS/SPB:M/GLM/CD	5.36017	1.40894e-07	0.798391	4.36349e-06	0.472263	97	59	10	0.237952	1.25773	1.49153	4	0.978659	1.06042	1.7693
15	94651581	rs58966810	ALC:ATF/SPB/LM:VERS/R	7.49784	3.17805e-08	438.23	6.66264e-05	1.5258	172	16	1	0.047619	100.18	85.1919	560	1.256	1.4419	NA
15	94651581	rs58966810	ALC:ATF/SPB/LM:VERS/CD	6.69187	2.03295e-07	37.0292	0.000292164	0.303462	172	16	1	0.047619	100.18	85.1919	560	1.256	1.4419	NA
5	9197788	rs73740393	ALC:ATF/SPB/LM:VERS/R	7.48938	3.24057e-08	438.625	7.00703e-05	1.52905	169	19	1	0.0555556	98.0514	101.926	560	1.22531	1.59737	NA
5	9197788	rs73740393	ALC:ATF/SPB/LM:VERS/CD	6.66603	2.15762e-07	47.4925	0.000335017	0.382713	169	19	1	0.0555556	98.0514	101.926	560	1.22531	1.59737	NA
15	62358689	rs80092463	ALC:PACS/SPB:M/GLM/CD	5.95084	3.2551e-08	5.27908	1.11985e-06	0.807086	158	7	1	0.0271084	3.3481	12.7143	0	0.947142	1.27845	NA
2	140834683	rs6709738	ALC:ATF/SPB/LM:VERS/R	7.4852	3.27187e-08	439.432	7.07434e-05	1.53572	178	10	1	0.031746	97.5263	111.6	560	1.24138	1.4298	NA
2	140834683	rs6709738	ALC:ATF/SPB/LM:VERS/CD	6.67056	2.13521e-07	73.0468	0.000335055	0.492963	178	10	1	0.031746	97.5263	111.6	560	1.24138	1.4298	NA
7	39500878	rs2278364	ALC:ATF/SPB/LM:VERS/R	7.48164	3.29884e-08	437.598	6.78828e-05	1.52062	166	21	1	0.0611702	97.4903	112.7	560	1.29066	1.14374	NA
7	39500878	rs2278364	ALC:ATF/SPB/LM:VERS/CD	6.76253	1.72771e-07	49.1603	0.000243957	0.385349	166	21	1	0.0611702	97.4903	112.7	560	1.29066	1.14374	NA
2	123917714	rs10496621	ALC:ATF/SPB/LM:VERS/R	7.48139	3.30074e-08	439.326	7.13348e-05	1.53484	165	23	1	0.0661376	95.0121	123.013	560	1.22947	1.46297	NA
2	123917714	rs10496621	ALC:ATF/SPB/LM:VERS/CD	7.39596	4.01826e-08	62.0857	4.36763e-05	0.484682	165	23	1	0.0661376	95.0121	123.013	560	1.22947	1.46297	NA
11	121132649	rs7105712	ALC:PACS/SPB:M/GLM/R	5.72285	3.50563e-08	9.625	1.89298e-06	1.34855	100	60	6	0.216867	3.36	3.4	13	0.947469	0.940907	1.18084
6	150931547	rs1891038	ALC:TAI/SPB:F/GLM/CD	7.45024	2.7725e-05	-9.21264	3.54621e-08	-0.202649	9	12	5	0.423077	54	45.3333	35.4	10.9096	7.05127	6.65442
6	150931547	rs1891038	ALC:TAI/SPB:F/GLM/A	5.74399	1.51023e-05	-9.71515	1.80306e-06	-0.213506	9	12	5	0.423077	54	45.3333	35.4	10.9096	7.05127	6.65442
4	23472916	rs6829223	ALC:ATF/SPB:M/GLM:VERS/R	7.44773	4.81675e-08	169.87	3.5667e-08	1.00674	96	63	7	0.231928	95.6704	103.437	267.571	1.40821	1.3373	1.21943
4	23472916	rs6829223	ALC:ATF/SPB:M/GLM:VERS/CD	6.57084	3.52213e-07	34.5511	2.68633e-07	0.306763	96	63	7	0.231928	95.6704	103.437	267.571	1.40821	1.3373	1.21943
4	23472916	rs6829223	ALC:ATF/SPB/GLM:VERS/R	5.70448	3.26083e-06	126.187	1.97481e-06	0.853263	111	72	9	0.234375	93.6825	96.3893	219.722	1.4412	1.27855	1.03405
4	23472916	rs6829223	ALC:ATF/SPB/LM:VERS/R	5.48667	3.26083e-06	126.187	1.97481e-06	0.853263	111	72	9	0.234375	93.6825	96.3893	219.722	1.4412	1.27855	1.03405
6	5722994	rs6924018	ALC:ATF/SPB/LM:VERS/R	6.13558	7.31853e-07	163.947	1.07978e-05	0.916671	139	47	6	0.153646	95.0854	94.8196	273.817	1.31315	1.23742	1.42599
6	5722994	rs6924018	ALC:ATF/SPB:M/GLM:VERS/R	5.77081	3.5769e-08	203.095	1.69508e-06	1.01111	120	41	5	0.153614	100.866	94.3663	320.18	1.33497	1.18335	1.84956
6	5722994	rs6924018	ALC:ATF/SPB/LM:VERS/CD	5.31228	4.87211e-06	31.3388	6.56035e-05	0.267951	139	47	6	0.153646	95.0854	94.8196	273.817	1.31315	1.23742	1.42599
9	7524011	rs35633583	ALC:TAI/SPB:F/GLM/D	7.41435	1.27482e-05	-13.3922	3.85166e-08	-0.304203	17	7	2	0.211538	51.0588	38.5714	34.5	8.73294	6.85948	3.75311
9	7524011	rs35633583	ALC:TAI/SPB:F/GLM/CD	6.69003	6.36887e-05	-9.92193	2.04162e-07	-0.234277	17	7	2	0.211538	51.0588	38.5714	34.5	8.73294	6.85948	3.75311
9	7524011	rs35633583	ALC:TAI/SPB:F/GLM/A	6.21004	1.27362e-05	-11.8359	6.16536e-07	-0.276954	17	7	2	0.211538	51.0588	38.5714	34.5	8.73294	6.85948	3.75311
3	41049931	rs2371351	ALC:PACS/SPB/LM/CD	7.39887	3.99145e-08	2.82668	7.11868e-06	0.60522	144	45	3	0.132812	3.23611	4.73333	17.3333	0.974186	0.856179	1.44278
3	41049931	rs2371351	ALC:PACS/SPB/LM/R	7.29336	5.08909e-08	13.7407	2.75069e-05	1.57376	144	45	3	0.132812	3.23611	4.73333	17.3333	0.974186	0.856179	1.44278
22	34977818	rs5755472	ALC:ATF/SPB/LM:VERS/CD	7.39659	4.01245e-08	179.546	2.70333e-07	1.05048	184	6	0	0.0157895	95.444	276.233	NA	1.3172	1.36052	NA
22	34977818	rs5755472	ALC:ATF/SPB/LM:VERS/D	7.39659	4.01245e-08	179.546	2.70333e-07	1.05048	184	6	0	0.0157895	95.444	276.233	NA	1.3172	1.36052	NA
22	34977818	rs5755472	ALC:ATF/SPB/LM:VERS/A	7.0752	8.41015e-08	176.657	1.34618e-06	1.02066	184	6	0	0.0157895	95.444	276.233	NA	1.3172	1.36052	NA
22	34977818	rs5755472	ALC:ATF/SPB/GLM:VERS/CD	6.5681	4.01245e-08	179.546	2.70333e-07	1.05048	184	6	0	0.0157895	95.444	276.233	NA	1.3172	1.36052	NA
22	34977818	rs5755472	ALC:ATF/SPB/GLM:VERS/D	6.5681	4.01245e-08	179.546	2.70333e-07	1.05048	184	6	0	0.0157895	95.444	276.233	NA	1.3172	1.36052	NA
22	34977818	rs5755472	ALC:ATF/SPB:M/GLM:VERS/CD	5.95886	3.05438e-07	173.288	1.09936e-06	0.988658	158	6	0	0.0182927	100.122	276.233	NA	1.32378	1.36052	NA
22	34977818	rs5755472	ALC:ATF/SPB:M/GLM:VERS/D	5.95886	3.05438e-07	173.288	1.09936e-06	0.988658	158	6	0	0.0182927	100.122	276.233	NA	1.32378	1.36052	NA
22	34977818	rs5755472	ALC:ATF/SPB/GLM:VERS/A	5.8709	8.41015e-08	176.657	1.34618e-06	1.02066	184	6	0	0.0157895	95.444	276.233	NA	1.3172	1.36052	NA
22	34977818	rs5755472	ALC:ATF/SPB:M/GLM:VERS/A	5.33113	5.96995e-07	170.027	4.66521e-06	0.956624	158	6	0	0.0182927	100.122	276.233	NA	1.32378	1.36052	NA
6	79745114	rs2092745	ALC:OCSD/SPB:M/GLM/R	7.38821	2.10039e-05	-10.7793	4.09058e-08	-1.80576	53	86	25	0.414634	13.5849	12.4767	2.12	1.0872	1.03153	0.795062
6	79745114	rs2092745	ALC:OCSD/SPB:M/GLM/CD	6.57052	0.000103498	-4.80513	2.68834e-07	-0.445809	53	86	25	0.414634	13.5849	12.4767	2.12	1.0872	1.03153	0.795062
6	79745114	rs2092745	ALC:OCSD/SPB/GLM/R	6.35027	2.04417e-05	-10.0289	4.46404e-07	-1.40366	62	97	30	0.415344	13.6774	13.0515	3.26667	1.12505	1.05427	0.531404
6	79745114	rs2092745	ALC:OCSD/SPB/GLM/CD	5.52333	0.000111133	-4.33671	2.99687e-06	-0.385016	62	97	30	0.415344	13.6774	13.0515	3.26667	1.12505	1.05427	0.531404
20	7970360	rs1543377	ALC:PACS/SPB:F/GLM/CD	7.3679	2.42107e-05	4.67805	4.28651e-08	0.823114	18	7	1	0.173077	2.05556	10.8571	0	0.94202	1.93519	NA
20	7970360	rs1543377	ALC:PACS/SPB:F/GLM/D	5.50116	0.000170625	7.44444	3.15387e-06	1.53075	18	7	1	0.173077	2.05556	10.8571	0	0.94202	1.93519	NA
4	78075266	rs17002919	ALC:PACS/SPB/LM/R	7.35102	4.45639e-08	9.83333	4.8776e-06	1.3375	138	48	6	0.15625	3.46377	3.60417	13.3333	0.880043	0.980174	1.30079
4	78075266	rs17002919	ALC:PACS/SPB/LM/CD	6.49275	3.21553e-07	1.96362	3.04653e-05	0.439352	138	48	6	0.15625	3.46377	3.60417	13.3333	0.880043	0.980174	1.30079
4	78075266	rs17002919	ALC:PACS/SPB/GLM/R	5.31179	4.45639e-08	9.83333	4.8776e-06	1.3375	138	48	6	0.15625	3.46377	3.60417	13.3333	0.880043	0.980174	1.30079
15	67181452	rs117185005	ALC:PACS/SPB/LM/CD	7.35102	4.45639e-08	9.83333	6.60078e-06	1.3375	186	6	0	0.015625	3.5	13.3333	NA	0.888536	1.46647	NA
15	67181452	rs117185005	ALC:PACS/SPB/LM/D	7.35102	4.45639e-08	9.83333	6.60078e-06	1.3375	186	6	0	0.015625	3.5	13.3333	NA	0.888536	1.46647	NA
15	67181452	rs117185005	ALC:PACS/SPB/LM/A	7.02163	9.51414e-08	9.67725	2.12017e-05	1.29387	186	6	0	0.015625	3.5	13.3333	NA	0.888536	1.46647	NA
5	52876811	rs76821534	ALC:OCSD/SPB/LM/R	6.58966	2.5724e-07	19.6648	1.12323e-05	1.03493	129	53	10	0.190104	10.8605	10.7736	30.5	0.957328	0.963079	2.4485
5	52876811	rs76821534	ALC:OCSD/SPB/LM/CD	5.74962	1.77984e-06	4.83204	6.80196e-05	0.35907	129	53	10	0.190104	10.8605	10.7736	30.5	0.957328	0.963079	2.4485
12	2510311	rs2239097	ALC:OCSD/SPB:F/GLM/CD	7.33594	1.39611e-06	6.44118	4.61383e-08	0.373278	16	8	2	0.230769	9.375	31	1	1.0841	5.85845	0.707107
20	48194775	rs6063224	ALC:SAI/SPB:M/GLM/D	7.32357	1.54283e-07	8.02943	4.74707e-08	0.193808	112	48	6	0.180723	37.5446	45.375	47.1667	4.65337	4.2148	9.75746
20	48194775	rs6063224	ALC:SAI/SPB:M/GLM/CD	6.47581	9.81943e-07	6.65038	3.34341e-07	0.15727	112	48	6	0.180723	37.5446	45.375	47.1667	4.65337	4.2148	9.75746
20	48194775	rs6063224	ALC:SAI/SPB:M/GLM/A	6.44436	3.91048e-07	6.80686	3.59448e-07	0.161153	112	48	6	0.180723	37.5446	45.375	47.1667	4.65337	4.2148	9.75746
20	48194775	rs6063224	ALC:SAI/SPB/GLM/D	5.57031	5.10636e-06	6.38281	2.68964e-06	0.155296	128	57	7	0.184896	37.9922	44.3509	44.5714	4.81615	4.05986	5.46081
6	98427824	rs117821988	ALC:ATF/SPB/LM:VERS/CD	7.32108	4.77437e-08	-5.41013	6.30571e-06	-0.0514657	168	23	1	0.0651042	103.02	64.1739	533	1.25953	1.79413	NA
6	98427824	rs117821988	ALC:ATF/SPB/LM:VERS/R	6.68958	2.04372e-07	412.022	0.000165119	1.48292	168	23	1	0.0651042	103.02	64.1739	533	1.25953	1.79413	NA
6	124340410	rs6915871	ALC:ATF/SPB:M/GLM:VERS/R	5.43698	4.87502e-08	312.818	3.65611e-06	1.38083	151	13	2	0.0512048	102.189	100.569	418	1.37932	0.70436	2.57018
11	27487134	rs11030024	ALC:PACS/SPB/LM/R	7.3055	4.94883e-08	11.9415	1.77088e-05	1.4715	133	55	4	0.164062	3.30075	4.18182	15.5	0.930786	0.84704	1.60155
11	27487134	rs11030024	ALC:PACS/SPB/LM/CD	6.8188	1.51776e-07	2.26793	3.07264e-05	0.514408	133	55	4	0.164062	3.30075	4.18182	15.5	0.930786	0.84704	1.60155
13	111203929	rs66525206	ALC:ATF/SPB/LM:VERS/R	7.29687	5.04816e-08	251.494	1.18934e-05	1.14625	135	54	3	0.15625	97.9814	92.2741	368.667	1.22625	1.42642	2.02526
13	111203929	rs66525206	ALC:ATF/SPB/LM:VERS/CD	6.50038	3.15951e-07	20.8044	5.55284e-05	0.187311	135	54	3	0.15625	97.9814	92.2741	368.667	1.22625	1.42642	2.02526
13	96579016	rs547571	ALC:PACS/SPB/LM/R	7.29336	5.08909e-08	13.7407	2.75069e-05	1.57376	148	41	3	0.122396	3.77027	2.95122	17.3333	0.904492	0.906564	1.44278
13	96579016	rs547571	ALC:PACS/SPB/LM/CD	6.69793	2.00479e-07	1.10995	6.78417e-05	0.263846	148	41	3	0.122396	3.77027	2.95122	17.3333	0.904492	0.906564	1.44278
4	82692529	rs74532980	ALC:ATF/SPB/LM:VERS/CD	7.27412	5.31961e-08	154.919	1.57098e-07	0.939433	181	8	0	0.021164	92.9237	255.012	NA	1.38586	1.17479	NA
4	82692529	rs74532980	ALC:ATF/SPB/LM:VERS/D	7.27412	5.31961e-08	154.919	1.57098e-07	0.939433	181	8	0	0.021164	92.9237	255.012	NA	1.38586	1.17479	NA
4	82692529	rs74532980	ALC:ATF/SPB/LM:VERS/A	6.90906	1.23294e-07	151.195	1.43346e-06	0.900702	181	8	0	0.021164	92.9237	255.012	NA	1.38586	1.17479	NA
4	82692529	rs74532980	ALC:ATF/SPB/GLM:VERS/CD	6.80383	5.31961e-08	154.919	1.57098e-07	0.939433	181	8	0	0.021164	92.9237	255.012	NA	1.38586	1.17479	NA
4	82692529	rs74532980	ALC:ATF/SPB/GLM:VERS/D	6.80383	5.31961e-08	154.919	1.57098e-07	0.939433	181	8	0	0.021164	92.9237	255.012	NA	1.38586	1.17479	NA
4	82692529	rs74532980	ALC:ATF/SPB:M/GLM:VERS/CD	5.9192	6.52584e-07	146.936	1.20447e-06	0.864207	156	8	0	0.0243902	97.8384	255.012	NA	1.39866	1.17479	NA
4	82692529	rs74532980	ALC:ATF/SPB:M/GLM:VERS/D	5.9192	6.52584e-07	146.936	1.20447e-06	0.864207	156	8	0	0.0243902	97.8384	255.012	NA	1.39866	1.17479	NA
4	82692529	rs74532980	ALC:ATF/SPB/GLM:VERS/A	5.84361	1.23294e-07	151.195	1.43346e-06	0.900702	181	8	0	0.021164	92.9237	255.012	NA	1.38586	1.17479	NA
4	26138055	rs907498	ALC:VAS/SPB/LM/R	7.25414	5.57012e-08	4.83598	2.26392e-05	1.44213	125	64	3	0.182292	1.544	1.40625	6.33333	1.12635	0.88397	2.19393
4	26138055	rs907498	ALC:VAS/SPB/LM/CD	6.47081	3.38209e-07	0.354519	0.000115567	0.214873	125	64	3	0.182292	1.544	1.40625	6.33333	1.12635	0.88397	2.19393
4	26138055	rs907498	ALC:PACS/SPB/LM/R	5.96054	1.09511e-06	12.3862	0.000177725	1.48784	125	64	3	0.182292	3.608	3.625	16	0.842933	0.938957	1.67726
10	51849217	rs1937701	ALC:PACS/SPB/LM/R	6.70522	1.97144e-07	11.4309	3.05317e-05	1.43572	130	58	4	0.171875	3.68462	3.31034	15	0.872603	0.989144	1.31559
10	51849217	rs1937701	ALC:PACS/SPB/LM/CD	5.92971	1.17569e-06	1.18331	0.00013568	0.287263	130	58	4	0.171875	3.68462	3.31034	15	0.872603	0.989144	1.31559
21	27076300	rs77565703	ALC:PACS/SPB/LM/R	6.70522	1.97144e-07	11.4309	1.90323e-05	1.43572	130	58	4	0.171875	3.57692	3.55172	15	0.979657	0.836194	1.07326
21	27076300	rs77565703	ALC:PACS/SPB/LM/CD	5.86081	1.37782e-06	1.45615	0.000112732	0.347976	130	58	4	0.171875	3.57692	3.55172	15	0.979657	0.836194	1.07326
15	35152413	rs2339783	ALC:OCSD/SPB:F/GLM/CD	7.24815	7.48386e-05	-18.7712	5.64745e-08	-1.9507	17	9	0	0.173077	21.8824	3.11111	NA	1.9371	0.726049	NA
15	35152413	rs2339783	ALC:OCSD/SPB:F/GLM/D	7.24815	7.48386e-05	-18.7712	5.64745e-08	-1.9507	17	9	0	0.173077	21.8824	3.11111	NA	1.9371	0.726049	NA
2	57553818	rs7580654	ALC:ATF/SPB:F/GLM:VERS/CD	7.24774	1.86472e-06	99.6667	5.65278e-08	1.09639	23	3	0	0.0576923	56.2348	149.667	NA	2.32865	4.4675	NA
2	57553818	rs7580654	ALC:ATF/SPB:F/GLM:VERS/D	7.24774	1.86472e-06	99.6667	5.65278e-08	1.09639	23	3	0	0.0576923	56.2348	149.667	NA	2.32865	4.4675	NA
3	31647367	rs114809261	ALC:ATF/SPB:F/GLM:VERS/CD	7.24774	1.86472e-06	99.6667	5.65278e-08	1.09639	23	3	0	0.0576923	56.2348	149.667	NA	2.32865	4.4675	NA
3	31647367	rs114809261	ALC:ATF/SPB:F/GLM:VERS/D	7.24774	1.86472e-06	99.6667	5.65278e-08	1.09639	23	3	0	0.0576923	56.2348	149.667	NA	2.32865	4.4675	NA
3	53643158	rs3774503	ALC:ATF/SPB:F/GLM:VERS/CD	7.24774	1.86472e-06	99.6667	5.65278e-08	1.09639	23	3	0	0.0576923	56.2348	149.667	NA	2.32865	4.4675	NA
3	53643158	rs3774503	ALC:ATF/SPB:F/GLM:VERS/D	7.24774	1.86472e-06	99.6667	5.65278e-08	1.09639	23	3	0	0.0576923	56.2348	149.667	NA	2.32865	4.4675	NA
7	105515091	rs62486981	ALC:ATF/SPB:F/GLM:VERS/CD	7.24774	1.86472e-06	99.6667	5.65278e-08	1.09639	23	3	0	0.0576923	56.2348	149.667	NA	2.32865	4.4675	NA
7	105515091	rs62486981	ALC:ATF/SPB:F/GLM:VERS/D	7.24774	1.86472e-06	99.6667	5.65278e-08	1.09639	23	3	0	0.0576923	56.2348	149.667	NA	2.32865	4.4675	NA
11	86766110	rs112550957	ALC:ATF/SPB:F/GLM:VERS/CD	7.24774	1.86472e-06	99.6667	5.65278e-08	1.09639	23	3	0	0.0576923	56.2348	149.667	NA	2.32865	4.4675	NA
11	86766110	rs112550957	ALC:ATF/SPB:F/GLM:VERS/D	7.24774	1.86472e-06	99.6667	5.65278e-08	1.09639	23	3	0	0.0576923	56.2348	149.667	NA	2.32865	4.4675	NA
20	49431342	rs117854993	ALC:ATF/SPB:F/GLM:VERS/CD	7.24774	1.86472e-06	99.6667	5.65278e-08	1.09639	23	3	0	0.0576923	56.2348	149.667	NA	2.32865	4.4675	NA
20	49431342	rs117854993	ALC:ATF/SPB:F/GLM:VERS/D	7.24774	1.86472e-06	99.6667	5.65278e-08	1.09639	23	3	0	0.0576923	56.2348	149.667	NA	2.32865	4.4675	NA
3	28837706	rs11129333	ALC:PACS/SPB:F/GLM/CD	7.24335	3.13558e-05	3.23529	5.71016e-08	0.622945	16	8	2	0.230769	1.8125	10.25	1	0.874489	1.87362	0.707107
12	96113949	rs4762131	ALC:PACS/SPB:M/GLM/CD	6.95107	5.81373e-08	0.851088	1.11926e-07	0.220925	79	75	12	0.298193	3.97468	2.46667	9.91667	1.04894	0.843604	1.14792
12	96113949	rs4762131	ALC:PACS/SPB:M/GLM/R	5.98099	1.23962e-07	6.67641	1.04475e-06	1.11856	79	75	12	0.298193	3.97468	2.46667	9.91667	1.04894	0.843604	1.14792
12	96113949	rs4762131	ALC:PACS/SPB/GLM/CD	5.93949	1.44859e-06	0.578105	1.14951e-06	0.147876	93	83	16	0.299479	4.13978	2.51807	8.5625	0.981348	0.8714	1.04146
12	96113949	rs4762131	ALC:PACS/SPB/LM/CD	5.83906	1.44859e-06	0.578105	1.14951e-06	0.147876	93	83	16	0.299479	4.13978	2.51807	8.5625	0.981348	0.8714	1.04146
11	74426506	rs612040	ALC:PACS/SPB:F/GLM/D	7.23316	1.79713e-06	-10.219	5.84571e-08	-1.6662	5	13	8	0.557692	12.6	2.92308	1.5	2.12072	1.20237	0.661438
11	74426506	rs612040	ALC:PACS/SPB:F/GLM/CD	6.58736	9.2399e-06	-5.06079	2.58604e-07	-1.22022	5	13	8	0.557692	12.6	2.92308	1.5	2.12072	1.20237	0.661438
7	511485	rs28472363	ALC:PACS/SPB:F/GLM/R	7.23316	1.79713e-06	10.219	5.84571e-08	1.6662	6	15	5	0.480769	2.5	2.33333	12.6	1.15316	0.903696	2.12072
7	511485	rs28472363	ALC:PACS/SPB:F/GLM/CD	6.09665	1.44966e-05	4.77544	8.00477e-07	1.14959	6	15	5	0.480769	2.5	2.33333	12.6	1.15316	0.903696	2.12072
10	123462521	rs2282015	ALC:PACS/SPB:F/GLM/R	7.23316	1.79713e-06	10.219	5.84571e-08	1.6662	8	13	5	0.442308	2.125	2.53846	12.6	0.773184	1.10585	2.12072
10	123462521	rs2282015	ALC:PACS/SPB:F/GLM/CD	6.0828	1.40335e-05	4.66565	8.26412e-07	1.11048	8	13	5	0.442308	2.125	2.53846	12.6	0.773184	1.10585	2.12072
11	74441963	rs10793085	ALC:PACS/SPB:F/GLM/R	7.23316	1.79713e-06	10.219	5.84571e-08	1.6662	9	12	5	0.423077	2	2.66667	12.6	0.7698	1.13551	2.12072
11	74441963	rs10793085	ALC:PACS/SPB:F/GLM/CD	6.13742	1.31569e-05	4.66092	7.28747e-07	1.09459	9	12	5	0.423077	2	2.66667	12.6	0.7698	1.13551	2.12072
11	5434699	rs1391619	ALC:TAI/SPB:F/GLM/CD	7.22104	5.56765e-05	-7.21212	6.01114e-08	-0.167216	18	6	2	0.192308	50.3889	34.8333	45.5	8.15978	7.02784	7.14964
11	5434699	rs1391619	ALC:TAI/SPB:F/GLM/D	5.73131	8.01657e-05	-12.8889	1.85649e-06	-0.29543	18	6	2	0.192308	50.3889	34.8333	45.5	8.15978	7.02784	7.14964
1	242563063	rs4658825	ALC:TAI/SPB:F/GLM/CD	7.20975	6.2495e-05	8.54023	6.16954e-08	0.187517	5	12	9	0.576923	34	47.25	52.2222	7.01366	9.90629	6.77329
1	242563063	rs4658825	ALC:TAI/SPB:F/GLM/D	6.60443	5.08187e-05	15.381	2.4864e-07	0.373204	5	12	9	0.576923	34	47.25	52.2222	7.01366	9.90629	6.77329
4	141601832	rs77692939	ALC:PACS/SPB/LM/CD	6.61598	2.42116e-07	8.65097	7.99953e-06	1.2463	185	7	0	0.0182292	3.49189	12.1429	NA	0.921475	1.12513	NA
4	141601832	rs77692939	ALC:PACS/SPB/LM/D	6.61598	2.42116e-07	8.65097	7.99953e-06	1.2463	185	7	0	0.0182292	3.49189	12.1429	NA	0.921475	1.12513	NA
4	141601832	rs77692939	ALC:PACS/SPB/LM/A	6.33135	4.66283e-07	8.49034	3.2968e-05	1.20132	185	7	0	0.0182292	3.49189	12.1429	NA	0.921475	1.12513	NA
4	141601832	rs77692939	ALC:PACS/SPB:M/GLM/CD	5.78628	6.1705e-08	8.79066	1.63577e-06	1.28712	159	7	0	0.0210843	3.3522	12.1429	NA	0.956592	1.12513	NA
4	141601832	rs77692939	ALC:PACS/SPB:M/GLM/D	5.78628	6.1705e-08	8.79066	1.63577e-06	1.28712	159	7	0	0.0210843	3.3522	12.1429	NA	0.956592	1.12513	NA
3	59634941	rs12493940	ALC:ATF/SPB/LM:VERS/R	7.18744	6.49475e-08	415.205	9.41454e-05	1.50957	148	42	1	0.115183	98.2109	91.5969	533	1.2637	1.32985	NA
3	59634941	rs12493940	ALC:ATF/SPB/LM:VERS/CD	6.51993	3.02047e-07	8.92622	0.00028381	0.0837079	148	42	1	0.115183	98.2109	91.5969	533	1.2637	1.32985	NA
3	160813840	rs4390979	ALC:ATF/SPB/LM:VERS/R	7.18744	6.49475e-08	415.205	9.41454e-05	1.50957	174	16	1	0.0471204	94.7086	118.938	533	1.28591	1.2455	NA
3	160813840	rs4390979	ALC:ATF/SPB/LM:VERS/CD	6.56203	2.74136e-07	59.0194	0.00027569	0.439439	174	16	1	0.0471204	94.7086	118.938	533	1.28591	1.2455	NA
19	46476250	rs73064667	ALC:ATF/SPB/LM:VERS/R	7.18744	6.49475e-08	415.205	9.41454e-05	1.50957	165	25	1	0.0706806	100.434	72.4292	533	1.28209	1.44373	NA
19	46476250	rs73064667	ALC:ATF/SPB/LM:VERS/CD	7.15038	7.07321e-08	3.85979	3.70018e-05	0.0365554	165	25	1	0.0706806	100.434	72.4292	533	1.28209	1.44373	NA
18	820381	rs10468774	ALC:ATF/SPB/LM:VERS/R	7.16552	6.83097e-08	415.205	9.71553e-05	1.50957	175	14	1	0.0421053	93.7737	131.921	533	1.29227	1.23675	NA
18	820381	rs10468774	ALC:ATF/SPB/LM:VERS/CD	7.13243	7.37179e-08	78.5813	5.10646e-05	0.554636	175	14	1	0.0421053	93.7737	131.921	533	1.29227	1.23675	NA
12	3884643	rs6489501	ALC:PACS/SPB:F/GLM/D	7.1613	7.98418e-06	-8.71429	6.89756e-08	-1.67843	7	13	6	0.480769	10.7143	1.76923	2.5	1.84006	0.802624	1.066
12	3884643	rs6489501	ALC:PACS/SPB:F/GLM/CD	6.14198	5.38768e-05	-4.29377	7.21146e-07	-1.1075	7	13	6	0.480769	10.7143	1.76923	2.5	1.84006	0.802624	1.066
12	3886763	rs12580270	ALC:PACS/SPB:F/GLM/D	7.1613	7.98418e-06	-8.71429	6.89756e-08	-1.67843	7	13	6	0.480769	10.7143	1.76923	2.5	1.84006	0.802624	1.066
12	3886763	rs12580270	ALC:PACS/SPB:F/GLM/CD	6.14198	5.38768e-05	-4.29377	7.21146e-07	-1.1075	7	13	6	0.480769	10.7143	1.76923	2.5	1.84006	0.802624	1.066
19	55910409	rs11670284	ALC:TAI/SPB:F/GLM/CD	7.15943	8.0625e-05	-4.55488	6.92734e-08	-0.0993831	10	12	4	0.384615	46.5	51.0833	32.25	9.10967	7.14091	8.75037
19	55910409	rs11670284	ALC:TAI/SPB:F/GLM/R	6.727	5.48253e-05	-16.75	1.87501e-07	-0.418302	10	12	4	0.384615	46.5	51.0833	32.25	9.10967	7.14091	8.75037
7	120547731	rs802340	ALC:ATF/SPB/LM:VERS/R	7.15135	7.05744e-08	195.082	2.89481e-06	0.993453	133	54	5	0.166667	90.7826	105.43	309.8	1.38343	1.31401	1.31702
7	120547731	rs802340	ALC:ATF/SPB/LM:VERS/CD	6.54833	2.82923e-07	39.8864	8.0181e-06	0.336477	133	54	5	0.166667	90.7826	105.43	309.8	1.38343	1.31401	1.31702
7	120547731	rs802340	ALC:ATF/SPB/GLM:VERS/R	5.53838	7.05744e-08	195.082	2.89481e-06	0.993453	133	54	5	0.166667	90.7826	105.43	309.8	1.38343	1.31401	1.31702
13	21737496	rs6490668	ALC:VAS/SPB:F/GLM/CD	7.1473	2.11642e-06	-0.235294	7.12354e-08	-0.120255	14	11	1	0.25	2.57143	0.727273	8	2.00286	0.924995	NA
13	21742356	rs9552482	ALC:VAS/SPB:F/GLM/CD	7.1473	2.11642e-06	-0.235294	7.12354e-08	-0.120255	14	11	1	0.25	2.57143	0.727273	8	2.00286	0.924995	NA
4	63017467	rs10213271	ALC:PACS/SPB:F/GLM/CD	7.12621	4.18925e-07	5.87037	7.47805e-08	1.10529	15	8	3	0.269231	1.73333	5	15.6667	0.817534	1.28489	4.87367
4	63017467	rs10213271	ALC:PACS/SPB:F/GLM/A	7.1194	9.39176e-07	7.15038	7.59622e-08	1.37458	15	8	3	0.269231	1.73333	5	15.6667	0.817534	1.28489	4.87367
22	47044773	rs4476	ALC:ATF/SPB:F/GLM:VERS/D	7.10905	0.000109626	57.8	7.77956e-08	0.93282	11	12	3	0.346154	38.8	92.4333	68.8	2.61971	2.20162	8.26043
22	47044773	rs4476	ALC:ATF/SPB:F/GLM:VERS/CD	6.09165	0.000593001	37.731	8.09748e-07	0.583717	11	12	3	0.346154	38.8	92.4333	68.8	2.61971	2.20162	8.26043
22	47044804	rs131896	ALC:ATF/SPB:F/GLM:VERS/D	7.10905	0.000109626	57.8	7.77956e-08	0.93282	11	12	3	0.346154	38.8	92.4333	68.8	2.61971	2.20162	8.26043
22	47044804	rs131896	ALC:ATF/SPB:F/GLM:VERS/CD	6.09165	0.000593001	37.731	8.09748e-07	0.583717	11	12	3	0.346154	38.8	92.4333	68.8	2.61971	2.20162	8.26043
9	132911517	rs1073123	ALC:ATF/SPB/LM:VERS/R	7.10852	7.78905e-08	415.205	0.00010029	1.50957	140	47	1	0.130319	100.799	87.3447	533	1.20798	1.85803	NA
9	132911517	rs1073123	ALC:ATF/SPB/LM:VERS/CD	6.45878	3.47714e-07	7.65745	0.000263162	0.0743206	140	47	1	0.130319	100.799	87.3447	533	1.20798	1.85803	NA
6	110016006	rs1564078	ALC:ATF/SPB:F/GLM:VERS/D	7.09724	3.00498e-05	-59.2895	7.99386e-08	-0.823021	9	15	2	0.365385	105.211	44.9	61	2.68973	2.87524	1.34792
6	110016006	rs1564078	ALC:ATF/SPB:F/GLM:VERS/CD	6.4433	0.000170704	-40.9027	3.60332e-07	-0.624602	9	15	2	0.365385	105.211	44.9	61	2.68973	2.87524	1.34792
6	56924513	rs1599281	ALC:ATF/SPB:M/GLM:VERS/R	5.35598	8.12196e-08	252.718	4.40575e-06	1.17736	122	41	3	0.141566	97.8402	110.727	365.863	1.23635	1.45607	1.71554
12	116351704	rs201491994	ALC:ATF/SPB/LM:VERS/CD	7.0866	8.19222e-08	51.3815	3.49577e-05	0.426453	152	38	1	0.104712	90.433	127.591	533	1.23576	1.37845	NA
12	116351704	rs201491994	ALC:ATF/SPB/LM:VERS/R	6.70209	1.98568e-07	412.795	0.000164533	1.48933	152	38	1	0.104712	90.433	127.591	533	1.23576	1.37845	NA
15	93243825	rs72752241	ALC:ATF/SPB/LM:VERS/R	7.08132	8.29243e-08	235.691	4.0511e-06	1.19468	155	31	3	0.0978836	94.2812	95.1097	338.433	1.32754	1.39176	1.31216
15	93243825	rs72752241	ALC:ATF/SPB/LM:VERS/CD	6.2363	5.80362e-07	33.097	2.47023e-05	0.284105	155	31	3	0.0978836	94.2812	95.1097	338.433	1.32754	1.39176	1.31216
15	93243825	rs72752241	ALC:ATF/SPB/GLM:VERS/R	5.39243	8.29243e-08	235.691	4.0511e-06	1.19468	155	31	3	0.0978836	94.2812	95.1097	338.433	1.32754	1.39176	1.31216
6	163875923	rs77035052	ALC:PACS/SPB:M/GLM/CD	6.01004	8.42426e-08	8.17089	9.77155e-07	1.23964	158	8	0	0.0240964	3.32911	11.5	NA	0.982414	1.04607	NA
6	163875923	rs77035052	ALC:PACS/SPB:M/GLM/D	6.01004	8.42426e-08	8.17089	9.77155e-07	1.23964	158	8	0	0.0240964	3.32911	11.5	NA	0.982414	1.04607	NA
13	38085716	rs9548182	ALC:OCSD/SPB:M/GLM/A	7.06264	9.3871e-08	7.39994	8.65694e-08	0.596759	81	65	19	0.312121	7.77778	12.2769	23.6316	0.905987	1.03823	1.49819
13	38085716	rs9548182	ALC:OCSD/SPB:M/GLM/CD	6.27653	2.81302e-07	6.83541	5.29013e-07	0.548099	81	65	19	0.312121	7.77778	12.2769	23.6316	0.905987	1.03823	1.49819
13	38085716	rs9548182	ALC:OCSD/SPB/LM/A	5.74083	1.81621e-06	6.25725	2.03443e-06	0.488933	93	74	24	0.319372	8.89247	12.5135	21.8333	0.909288	1.04938	1.41378
13	38085716	rs9548182	ALC:OCSD/SPB/GLM/A	5.69156	1.81621e-06	6.25725	2.03443e-06	0.488933	93	74	24	0.319372	8.89247	12.5135	21.8333	0.909288	1.04938	1.41378
9	78474914	rs3010681	ALC:ATF/SPB:F/GLM:VERS/CD	7.05435	3.53734e-05	60.7182	8.82369e-08	0.845344	17	9	0	0.173077	47.7647	103.378	NA	2.33659	2.53014	NA
9	78474914	rs3010681	ALC:ATF/SPB:F/GLM:VERS/D	7.05435	3.53734e-05	60.7182	8.82369e-08	0.845344	17	9	0	0.173077	47.7647	103.378	NA	2.33659	2.53014	NA
12	128764525	rs11059892	ALC:PACS/SPB:F/GLM/CD	7.03255	0.000662223	-0.777778	9.27794e-08	-0.185826	12	8	6	0.384615	3.25	9.25	0	0.974889	1.58803	NA
2	79414039	rs114921167	ALC:VAS/SPB/LM/CD	6.20927	6.17626e-07	2.96118	1.98371e-05	1.10459	184	7	0	0.0183246	1.46739	4.42857	NA	1.02671	1.6044	NA
2	79414039	rs114921167	ALC:VAS/SPB/LM/D	6.20927	6.17626e-07	2.96118	1.98371e-05	1.10459	184	7	0	0.0183246	1.46739	4.42857	NA	1.02671	1.6044	NA
2	79414039	rs114921167	ALC:VAS/SPB/LM/A	5.95538	1.10822e-06	2.9059	4.83535e-05	1.06761	184	7	0	0.0183246	1.46739	4.42857	NA	1.02671	1.6044	NA
2	79414039	rs114921167	ALC:VAS/SPB:M/GLM/CD	5.38597	9.32967e-08	3.04882	4.11177e-06	1.16618	158	7	0	0.0212121	1.37975	4.42857	NA	1.03462	1.6044	NA
2	79414039	rs114921167	ALC:VAS/SPB:M/GLM/D	5.38597	9.32967e-08	3.04882	4.11177e-06	1.16618	158	7	0	0.0212121	1.37975	4.42857	NA	1.03462	1.6044	NA
13	33092189	rs8002972	ALC:OCSD/SPB:F/GLM/D	7.02224	0.000113555	-18.4314	9.5009e-08	-1.87632	17	8	1	0.192308	21.7647	3.75	0	1.88854	0.885642	NA
13	33092189	rs8002972	ALC:OCSD/SPB:F/GLM/CD	6.55325	0.000646553	-15.1887	2.79736e-07	-1.80061	17	8	1	0.192308	21.7647	3.75	0	1.88854	0.885642	NA
13	33092189	rs8002972	ALC:OCSD/SPB:F/GLM/A	5.41788	0.000411701	-15.3333	3.82048e-06	-1.81011	17	8	1	0.192308	21.7647	3.75	0	1.88854	0.885642	NA
4	90989732	rs6849036	ALC:ATF/SPB/LM:VERS/R	6.85127	1.40841e-07	150.842	1.18421e-06	0.89249	119	65	8	0.210938	100.034	82.4798	256.375	1.26817	1.59199	1.37793
4	90989732	rs6849036	ALC:ATF/SPB/LM:VERS/CD	6.62452	2.37399e-07	16.609	7.46291e-07	0.152483	119	65	8	0.210938	100.034	82.4798	256.375	1.26817	1.59199	1.37793
4	90989732	rs6849036	ALC:ATF/SPB:M/GLM:VERS/CD	6.43995	1.28943e-07	17.6426	3.6312e-07	0.153315	102	57	7	0.213855	104.925	86.2016	279.714	1.27153	1.62079	1.4887
4	90989732	rs6849036	ALC:ATF/SPB/GLM:VERS/CD	6.12709	2.37399e-07	16.609	7.46291e-07	0.152483	119	65	8	0.210938	100.034	82.4798	256.375	1.26817	1.59199	1.37793
4	90989732	rs6849036	ALC:ATF/SPB:M/GLM:VERS/R	6.05783	9.50391e-08	167.475	8.75324e-07	0.919468	102	57	7	0.213855	104.925	86.2016	279.714	1.27153	1.62079	1.4887
4	90989732	rs6849036	ALC:ATF/SPB/GLM:VERS/R	5.92657	1.40841e-07	150.842	1.18421e-06	0.89249	119	65	8	0.210938	100.034	82.4798	256.375	1.26817	1.59199	1.37793
15	73722956	rs118072658	ALC:ATF/SPB/LM:VERS/A	7.0066	9.84909e-08	175.819	4.27215e-06	0.937537	188	2	2	0.015625	96.9164	228	320	1.26067	2.06693	0.942809
15	73722956	rs118072658	ALC:ATF/SPB/GLM:VERS/A	5.36935	9.84909e-08	175.819	4.27215e-06	0.937537	188	2	2	0.015625	96.9164	228	320	1.26067	2.06693	0.942809
18	57872014	rs4941159	ALC:OCSD/SPB:F/GLM/R	6.99541	0.000414809	-18.5113	1.01064e-07	-2.39495	8	11	7	0.480769	18.375	21.8182	1.85714	1.35786	2.04021	0.846826
18	57872014	rs4941159	ALC:OCSD/SPB:F/GLM/CD	5.98194	0.00175215	-7.92802	1.04246e-06	-0.540112	8	11	7	0.480769	18.375	21.8182	1.85714	1.35786	2.04021	0.846826
11	70075223	rs10897924	ALC:OCSD/SPB:F/GLM/R	6.99481	0.000176014	-18.6111	1.01201e-07	-2.13351	3	15	8	0.596154	16.6667	22	2.5	2.88675	1.78864	0.705095
11	70075223	rs10897924	ALC:OCSD/SPB:F/GLM/CD	6.31839	0.000723479	-10.6513	4.80408e-07	-0.680447	3	15	8	0.596154	16.6667	22	2.5	2.88675	1.78864	0.705095
17	65627368	rs112311313	ALC:VAS/SPB/LM/A	5.44908	3.55568e-06	2.76317	8.32225e-05	1.0349	186	5	1	0.0182292	1.50538	2.8	8	1.03615	0.899026	NA
19	1359887	rs72981692	ALC:VAS/SPB/LM/A	5.65753	2.20023e-06	2.16937	3.46665e-05	0.895621	180	10	1	0.0314136	1.46111	2.8	8	1.00449	1.33485	NA
19	1359887	rs72981692	ALC:VAS/SPB/LM/CD	5.35233	4.44292e-06	1.90356	0.000454333	0.753733	180	10	1	0.0314136	1.46111	2.8	8	1.00449	1.33485	NA
1	187453740	rs1938512	ALC:SAI/SPB/LM/R	6.98318	1.03949e-07	34.2368	8.22053e-07	0.621124	125	65	2	0.179688	39.968	39.3692	74	4.89411	4.03683	13.0815
1	187453740	rs1938512	ALC:SAI/SPB/LM/CD	6.17232	6.72476e-07	1.79935	5.0967e-06	0.0444401	125	65	2	0.179688	39.968	39.3692	74	4.89411	4.03683	13.0815
1	187453740	rs1938512	ALC:SAI/SPB/GLM/R	6.0851	1.03949e-07	34.2368	8.22053e-07	0.621124	125	65	2	0.179688	39.968	39.3692	74	4.89411	4.03683	13.0815
1	187453740	rs1938512	ALC:SAI/SPB:M/GLM/R	5.90715	1.88363e-07	34.2561	1.23837e-06	0.621609	105	59	2	0.189759	39.781	39.678	74	4.77314	4.04494	13.0815
19	47070270	rs62136856	ALC:ATF/SPB/GLM:VERS/D	6.97639	4.32726e-06	-53.529	1.05587e-07	-0.520524	80	83	29	0.367188	133.211	77.5172	76.7403	1.19762	1.69026	1.55524
19	47070270	rs62136856	ALC:ATF/SPB:M/GLM:VERS/D	6.32222	1.63203e-05	-55.6022	4.76185e-07	-0.517054	71	67	28	0.370482	140.196	81.0378	78.2311	1.21926	1.68067	1.57791
19	47070270	rs62136856	ALC:ATF/SPB/GLM:VERS/CD	6.11524	2.62593e-05	-32.2547	7.66942e-07	-0.34593	80	83	29	0.367188	133.211	77.5172	76.7403	1.19762	1.69026	1.55524
19	47070270	rs62136856	ALC:ATF/SPB:M/GLM:VERS/CD	5.47274	9.49876e-05	-33.0293	3.36711e-06	-0.338367	71	67	28	0.370482	140.196	81.0378	78.2311	1.21926	1.68067	1.57791
19	47070270	rs62136856	ALC:ATF/SPB/LM:VERS/D	5.36379	4.32726e-06	-53.529	1.05587e-07	-0.520524	80	83	29	0.367188	133.211	77.5172	76.7403	1.19762	1.69026	1.55524
19	47070270	rs62136856	ALC:ATF/SPB/GLM:VERS/A	5.35441	5.49045e-05	-34.414	4.4217e-06	-0.365764	80	83	29	0.367188	133.211	77.5172	76.7403	1.19762	1.69026	1.55524
19	47070270	rs62136856	ALC:ATF/SPB:M/GLM:VERS/A	5.30505	7.73129e-05	-37.3248	4.95394e-06	-0.379307	71	67	28	0.370482	140.196	81.0378	78.2311	1.21926	1.68067	1.57791
11	134691784	rs11223939	ALC:ATF/SPB/GLM:VERS/CD	6.97226	2.90338e-06	46.7721	1.06595e-07	0.387381	154	35	3	0.106771	88.2162	158.82	57.4333	1.49426	1.12233	1.85922
11	134691784	rs11223939	ALC:ATF/SPB:M/GLM:VERS/CD	6.2272	1.13253e-05	55.6485	5.92647e-07	0.440812	132	32	2	0.108434	91.6992	166.853	65.15	1.5038	1.14859	1.65415
11	134691784	rs11223939	ALC:ATF/SPB:M/GLM:VERS/D	6.09069	1.0056e-05	69.5073	8.11537e-07	0.565262	132	32	2	0.108434	91.6992	166.853	65.15	1.5038	1.14859	1.65415
11	134691784	rs11223939	ALC:ATF/SPB/GLM:VERS/D	6.0413	9.50441e-06	63.8805	9.09278e-07	0.549044	154	35	3	0.106771	88.2162	158.82	57.4333	1.49426	1.12233	1.85922
11	134691784	rs11223939	ALC:ATF/SPB/LM:VERS/CD	5.5371	2.90338e-06	46.7721	1.06595e-07	0.387381	154	35	3	0.106771	88.2162	158.82	57.4333	1.49426	1.12233	1.85922
11	114207218	rs527392	ALC:TAI/SPB:F/GLM/CD	6.96921	1.53515e-05	-12.7024	1.07346e-07	-0.278315	14	12	0	0.230769	52.2857	39.5833	NA	9.46319	6.10179	NA
11	114207218	rs527392	ALC:TAI/SPB:F/GLM/D	6.96921	1.53515e-05	-12.7024	1.07346e-07	-0.278315	14	12	0	0.230769	52.2857	39.5833	NA	9.46319	6.10179	NA
10	20206238	rs80261185	ALC:PACS/SPB/LM/CD	6.39771	4.00214e-07	8.5027	1.18094e-05	1.23292	185	7	0	0.0182292	3.4973	12	NA	0.917705	1.12226	NA
10	20206238	rs80261185	ALC:PACS/SPB/LM/D	6.39771	4.00214e-07	8.5027	1.18094e-05	1.23292	185	7	0	0.0182292	3.4973	12	NA	0.917705	1.12226	NA
10	20206238	rs80261185	ALC:PACS/SPB/LM/A	6.13054	7.40391e-07	8.34483	4.41792e-05	1.18876	185	7	0	0.0182292	3.4973	12	NA	0.917705	1.12226	NA
10	20206238	rs80261185	ALC:PACS/SPB:M/GLM/CD	5.57793	1.07578e-07	8.64151	2.64286e-06	1.27342	159	7	0	0.0210843	3.35849	12	NA	0.950993	1.12226	NA
10	20206238	rs80261185	ALC:PACS/SPB:M/GLM/D	5.57793	1.07578e-07	8.64151	2.64286e-06	1.27342	159	7	0	0.0210843	3.35849	12	NA	0.950993	1.12226	NA
16	1946628	rs74930354	ALC:PACS/SPB/LM/CD	6.39771	4.00214e-07	8.5027	1.85336e-05	1.23292	185	7	0	0.0182292	3.4973	12	NA	0.886723	1.31982	NA
16	1946628	rs74930354	ALC:PACS/SPB/LM/D	6.39771	4.00214e-07	8.5027	1.85336e-05	1.23292	185	7	0	0.0182292	3.4973	12	NA	0.886723	1.31982	NA
16	1946628	rs74930354	ALC:PACS/SPB/LM/A	6.13054	7.40391e-07	8.34483	5.23284e-05	1.18876	185	7	0	0.0182292	3.4973	12	NA	0.886723	1.31982	NA
17	11780872	rs62063192	ALC:TAI/SPB:F/GLM/A	6.96652	3.35444e-06	-12.9048	1.08014e-07	-0.306356	19	4	3	0.192308	49.6842	41.5	32.3333	8.24197	4.0629	7.17045
17	11780872	rs62063192	ALC:SAI/SPB:F/GLM/A	5.83422	2.19574e-05	-10.8762	1.46482e-06	-0.299895	19	4	3	0.192308	42.8947	33.25	29.6667	6.80217	8.60906	3.48819
20	58002525	rs6128241	ALC:SAI/SPB:F/GLM/CD	6.95893	4.98513e-05	0.132353	1.09918e-07	0.00331474	16	8	2	0.230769	38	47.25	25.5	7.75672	8.04437	3.2784
16	56699367	rs35244034	ALC:SAI/SPB:F/GLM/CD	6.94511	0.000129556	-9.91244	1.13472e-07	-0.267596	16	9	1	0.211538	43.8125	35.1111	20	6.74738	10.6539	NA
16	3982020	rs7187649	ALC:SAI/SPB:M/GLM/CD	6.93794	1.31952e-07	14.5931	1.1536e-07	0.316768	153	12	0	0.0363636	39.1569	53.75	NA	4.62563	4.21326	NA
16	3982020	rs7187649	ALC:SAI/SPB:M/GLM/D	6.93794	1.31952e-07	14.5931	1.1536e-07	0.316768	153	12	0	0.0363636	39.1569	53.75	NA	4.62563	4.21326	NA
16	3982020	rs7187649	ALC:SAI/SPB:M/GLM/A	6.12655	3.79386e-07	14.0425	7.47231e-07	0.302802	153	12	0	0.0363636	39.1569	53.75	NA	4.62563	4.21326	NA
16	3982020	rs7187649	ALC:SAI/SPB/GLM/CD	5.81221	1.56867e-06	12.1461	1.54096e-06	0.269415	177	14	0	0.0366492	39.2825	51.4286	NA	4.68379	3.8436	NA
16	3982020	rs7187649	ALC:SAI/SPB/GLM/D	5.81221	1.56867e-06	12.1461	1.54096e-06	0.269415	177	14	0	0.0366492	39.2825	51.4286	NA	4.68379	3.8436	NA
16	3982020	rs7187649	ALC:SAI/SPB/LM/CD	5.80447	1.56867e-06	12.1461	1.54096e-06	0.269415	177	14	0	0.0366492	39.2825	51.4286	NA	4.68379	3.8436	NA
16	3982020	rs7187649	ALC:SAI/SPB/LM/D	5.80447	1.56867e-06	12.1461	1.54096e-06	0.269415	177	14	0	0.0366492	39.2825	51.4286	NA	4.68379	3.8436	NA
16	3982020	rs7187649	ALC:SAI/SPB/LM/A	5.47922	3.31727e-06	11.684	5.51657e-06	0.257721	177	14	0	0.0366492	39.2825	51.4286	NA	4.68379	3.8436	NA
6	64171962	rs79171362	ALC:ATF/SPB:F/GLM:VERS/A	6.77386	1.16132e-07	95.5632	1.68321e-07	0.955962	23	2	1	0.0769231	56.8435	124.5	186	2.22099	4.75864	NA
1	118056327	rs12124243	ALC:PACS/SPB:F/GLM/CD	6.93243	0.000153093	0.951087	1.16834e-07	0.207715	14	8	4	0.307692	2.28571	9.875	0.5	1.07422	1.63652	0.5
11	35901378	rs75701861	ALC:PACS/SPB/LM/D	5.5699	2.69213e-06	7.90965	6.56292e-05	1.17796	185	6	1	0.0208333	3.51892	12.6667	4	0.883008	1.35438	NA
11	35901378	rs75701861	ALC:PACS/SPB/LM/CD	5.54882	2.82602e-06	5.53879	0.000150598	0.803363	185	6	1	0.0208333	3.51892	12.6667	4	0.883008	1.35438	NA
11	132348160	rs486659	ALC:VAS/SPB:F/GLM/CD	6.91798	8.15164e-06	2.12639	1.20787e-07	0.935901	13	11	2	0.288462	1	2.36364	6.5	1.41421	1.64901	3.06413
2	114446340	rs10208402	ALC:TAI/SPB:F/GLM/R	6.90469	3.27514e-05	-14.6333	1.2454e-07	-0.347916	8	12	6	0.461538	51.25	48.8333	35.1667	8.61897	7.21674	6.77201
2	114446340	rs10208402	ALC:TAI/SPB:F/GLM/CD	6.11816	0.000152636	-7.66667	7.61791e-07	-0.166812	8	12	6	0.461538	51.25	48.8333	35.1667	8.61897	7.21674	6.77201
7	45217376	rs1294865	ALC:VAS/SPB:F/GLM/CD	6.89519	0.000419385	1.04	1.27294e-07	0.510826	10	10	6	0.423077	0.5	3.4	2.16667	0.948683	1.64602	2.87825
7	45217376	rs1294865	ALC:VAS/SPB:F/GLM/D	6.34952	0.000307172	2.4375	4.47172e-07	1.77071	10	10	6	0.423077	0.5	3.4	2.16667	0.948683	1.64602	2.87825
10	18209417	rs73595532	ALC:PACS/SPB:M/GLM/CD	6.53609	1.30194e-07	6.02119	2.91011e-07	1.0627	151	15	0	0.0451807	3.17881	9.2	NA	0.985021	1.03771	NA
10	18209417	rs73595532	ALC:PACS/SPB:M/GLM/D	6.53609	1.30194e-07	6.02119	2.91011e-07	1.0627	151	15	0	0.0451807	3.17881	9.2	NA	0.985021	1.03771	NA
10	18209417	rs73595532	ALC:PACS/SPB/LM/CD	5.35927	4.37248e-06	5.25568	1.31132e-05	0.939955	176	16	0	0.0416667	3.36932	8.625	NA	0.937371	0.972545	NA
10	18209417	rs73595532	ALC:PACS/SPB/LM/D	5.35927	4.37248e-06	5.25568	1.31132e-05	0.939955	176	16	0	0.0416667	3.36932	8.625	NA	0.937371	0.972545	NA
4	138684796	rs10004565	ALC:ATF/SPB:F/GLM:VERS/CD	6.88528	1.13693e-05	44.2034	1.30231e-07	0.582668	15	9	2	0.25	49.26	74.9444	164.5	2.82739	2.26401	5.41019
4	61309658	rs115436187	ALC:PACS/SPB/LM/A	6.87712	1.32702e-07	5.94022	4.69893e-06	0.981592	177	14	1	0.0416667	3.37288	8.28571	18	0.87263	1.12846	NA
4	61309658	rs115436187	ALC:VAS/SPB/LM/A	6.75253	1.76795e-07	2.07609	4.17717e-06	0.874097	177	14	1	0.0416667	1.41243	3.35714	5	1.027	1.31125	NA
4	61309658	rs115436187	ALC:VAS/SPB/LM/D	6.15584	6.98482e-07	2.05424	5.49114e-06	0.897882	177	14	1	0.0416667	1.41243	3.35714	5	1.027	1.31125	NA
4	61309658	rs115436187	ALC:PACS/SPB/LM/CD	5.90796	1.23605e-06	5.465	4.42751e-05	0.872684	177	14	1	0.0416667	3.37288	8.28571	18	0.87263	1.12846	NA
4	61309658	rs115436187	ALC:PACS/SPB/LM/D	5.63976	2.29213e-06	5.56045	1.81842e-05	0.974022	177	14	1	0.0416667	3.37288	8.28571	18	0.87263	1.12846	NA
4	61309658	rs115436187	ALC:VAS/SPB/LM/CD	5.57826	2.6408e-06	1.91	2.73997e-05	0.780274	177	14	1	0.0416667	1.41243	3.35714	5	1.027	1.31125	NA
4	61309658	rs115436187	ALC:VAS/SPB/GLM/A	5.37912	1.76795e-07	2.07609	4.17717e-06	0.874097	177	14	1	0.0416667	1.41243	3.35714	5	1.027	1.31125	NA
4	61309658	rs115436187	ALC:PACS/SPB/GLM/A	5.328	1.32702e-07	5.94022	4.69893e-06	0.981592	177	14	1	0.0416667	3.37288	8.28571	18	0.87263	1.12846	NA
3	112392234	rs9851461	ALC:PACS/SPB/LM/R	6.41376	3.8569e-07	15.8065	0.00017262	1.66383	163	23	2	0.0718085	3.73006	3.43478	19.5	0.879467	1.08212	1.45143
3	112392234	rs9851461	ALC:PACS/SPB/LM/CD	5.60073	2.50767e-06	1.9443	0.000826167	0.409704	163	23	2	0.0718085	3.73006	3.43478	19.5	0.879467	1.08212	1.45143
6	14728641	rs116366695	ALC:PACS/SPB/LM/CD	6.85384	1.4001e-07	9.48925	1.42941e-05	1.30912	186	6	0	0.015625	3.51075	13	NA	0.882399	1.46447	NA
6	14728641	rs116366695	ALC:PACS/SPB/LM/D	6.85384	1.4001e-07	9.48925	1.42941e-05	1.30912	186	6	0	0.015625	3.51075	13	NA	0.882399	1.46447	NA
6	14728641	rs116366695	ALC:PACS/SPB/LM/A	6.56641	2.71389e-07	9.33862	3.89742e-05	1.26711	186	6	0	0.015625	3.51075	13	NA	0.882399	1.46447	NA
8	101627699	rs72674257	ALC:PACS/SPB:M/GLM/CD	5.63907	1.41051e-07	8.03956	2.29576e-06	1.22681	158	8	0	0.0240964	3.33544	11.375	NA	0.952496	1.10642	NA
8	101627699	rs72674257	ALC:PACS/SPB:M/GLM/D	5.63907	1.41051e-07	8.03956	2.29576e-06	1.22681	158	8	0	0.0240964	3.33544	11.375	NA	0.952496	1.10642	NA
10	111302582	rs4617520	ALC:PACS/SPB:F/GLM/CD	6.84546	4.53378e-06	9.97143	1.42739e-07	1.63039	21	5	0	0.0961538	2.42857	12.4	NA	1.00348	1.9533	NA
10	111302582	rs4617520	ALC:PACS/SPB:F/GLM/D	6.84546	4.53378e-06	9.97143	1.42739e-07	1.63039	21	5	0	0.0961538	2.42857	12.4	NA	1.00348	1.9533	NA
12	127663845	rs11613525	ALC:PACS/SPB:F/GLM/D	6.84546	4.53378e-06	9.97143	1.42739e-07	1.63039	21	4	1	0.115385	2.42857	11.25	17	1.00348	1.67861	NA
12	127663845	rs11613525	ALC:PACS/SPB:F/GLM/CD	6.02235	1.09895e-05	8	9.49839e-07	1.0745	21	4	1	0.115385	2.42857	11.25	17	1.00348	1.67861	NA
15	77537748	rs1317320	ALC:ATF/SPB:M/GLM:VERS/R	6.84093	2.19824e-06	85.2848	1.44236e-07	0.664441	53	89	24	0.412651	94.8057	93.9497	174.486	1.50257	1.44808	1.09679
15	77537748	rs1317320	ALC:ATF/SPB/GLM:VERS/R	6.64287	2.12416e-06	76.9498	2.27576e-07	0.628449	60	104	28	0.416667	90.595	89.2127	164.374	1.48066	1.44147	1.08906
15	77537748	rs1317320	ALC:ATF/SPB:M/GLM:VERS/CD	5.97301	1.3998e-05	32.7542	1.06412e-06	0.309696	53	89	24	0.412651	94.8057	93.9497	174.486	1.50257	1.44808	1.09679
15	77537748	rs1317320	ALC:ATF/SPB/GLM:VERS/CD	5.78649	1.35177e-05	30.0314	1.63497e-06	0.295967	60	104	28	0.416667	90.595	89.2127	164.374	1.48066	1.44147	1.08906
15	77537748	rs1317320	ALC:ATF/SPB/LM:VERS/R	5.67281	2.12416e-06	76.9498	2.27576e-07	0.628449	60	104	28	0.416667	90.595	89.2127	164.374	1.48066	1.44147	1.08906
4	42893406	rs57655409	ALC:SAI/SPB:F/GLM/A	5.58648	0.000103299	-20.68	2.59134e-06	-0.710004	25	0	1	0.0384615	40.68	NA	20	5.86291	NA	NA
11	134344100	rs12419831	ALC:PACS/SPB/LM/CD	6.15673	6.9706e-07	3.14009	0.000519416	0.633374	164	27	1	0.0755208	3.42683	5.33333	25	0.83066	1.17464	NA
11	134344100	rs12419831	ALC:PACS/SPB/LM/R	5.94059	1.14659e-06	21.3037	0.000999741	1.91153	164	27	1	0.0755208	3.42683	5.33333	25	0.83066	1.17464	NA
10	122092312	rs11200392	ALC:PACS/SPB:F/GLM/CD	6.81624	3.09244e-05	4.54082	1.52673e-07	0.774153	19	6	1	0.153846	2.31579	11.5	0	0.991949	1.93012	NA
11	122571153	rs4935798	ALC:PACS/SPB:F/GLM/CD	6.81582	0.000618743	-5.44	1.52818e-07	-1.43814	8	14	3	0.4	9.625	2.57143	0	1.53877	1.16414	NA
11	122571153	rs4935798	ALC:VAS/SPB:F/GLM/CD	6.79577	0.000920403	-1.98	1.60041e-07	-1.09347	8	14	3	0.4	3.75	1.5	0	1.71419	1.59483	NA
11	122571153	rs4935798	ALC:PACS/SPB:F/GLM/D	5.45124	0.000176419	-7.50735	3.53804e-06	-1.51406	8	14	3	0.4	9.625	2.57143	0	1.53877	1.16414	NA
19	47065746	rs3810291	ALC:ATF/SPB/GLM:VERS/D	6.81104	5.06091e-06	-53.8486	1.54512e-07	-0.514294	74	88	30	0.385417	135.086	79.2094	78.3157	1.18459	1.64781	1.59028	Smoking initiation (ever smoked regularly) (MTAG)	7.69897
19	47065746	rs3810291	ALC:ATF/SPB/GLM:VERS/CD	5.96199	3.01483e-05	-31.8054	1.09146e-06	-0.337766	74	88	30	0.385417	135.086	79.2094	78.3157	1.18459	1.64781	1.59028	Smoking initiation (ever smoked regularly) (MTAG)	7.69897
19	47065746	rs3810291	ALC:ATF/SPB:M/GLM:VERS/D	5.82758	3.1874e-05	-54.1324	1.48738e-06	-0.497727	68	69	29	0.38253	140.69	82.5004	79.8093	1.20941	1.61803	1.61486	Smoking initiation (ever smoked regularly) (MTAG)	7.69897
2	45033720	rs4953174	ALC:OCSD/SPB/GLM/A	6.80625	9.23765e-07	-6.74671	1.56225e-07	-0.680381	106	69	17	0.268229	15.5472	7.89855	4.94118	1.2117	0.832969	0.547135
2	45033720	rs4953174	ALC:OCSD/SPB/GLM/D	6.29052	1.53676e-06	-8.23322	5.12253e-07	-0.754095	106	69	17	0.268229	15.5472	7.89855	4.94118	1.2117	0.832969	0.547135
2	45033720	rs4953174	ALC:OCSD/SPB/LM/A	6.03444	9.23765e-07	-6.74671	1.56225e-07	-0.680381	106	69	17	0.268229	15.5472	7.89855	4.94118	1.2117	0.832969	0.547135
2	45033720	rs4953174	ALC:OCSD/SPB/LM/D	5.8134	1.53676e-06	-8.23322	5.12253e-07	-0.754095	106	69	17	0.268229	15.5472	7.89855	4.94118	1.2117	0.832969	0.547135
2	45033720	rs4953174	ALC:OCSD/SPB/GLM/CD	5.77074	6.29915e-06	-6.22077	1.69535e-06	-0.634446	106	69	17	0.268229	15.5472	7.89855	4.94118	1.2117	0.832969	0.547135
2	45033720	rs4953174	ALC:OCSD/SPB:M/GLM/A	5.31404	1.62635e-05	-6.19238	4.85241e-06	-0.643993	89	61	16	0.28012	14.8539	7.7541	5.125	1.17426	0.80774	0.551415
2	212936723	rs72940693	ALC:ATF/SPB:F/GLM:VERS/CD	6.79328	3.73723e-06	99	1.60962e-07	1.08314	22	3	0	0.06	56.8818	149.667	NA	2.32052	4.4675	NA
2	212936723	rs72940693	ALC:ATF/SPB:F/GLM:VERS/D	6.79328	3.73723e-06	99	1.60962e-07	1.08314	22	3	0	0.06	56.8818	149.667	NA	2.32052	4.4675	NA
18	2635567	rs73936737	ALC:ATF/SPB:M/GLM:VERS/R	5.97568	1.63229e-07	214.08	1.05759e-06	1.11677	101	60	4	0.206061	99.2725	103.923	318.5	1.35499	1.33777	1.20733
3	179604915	rs35399127	ALC:ATF/SPB/LM:VERS/CD	5.98423	1.03698e-06	174.493	9.15797e-06	1.00637	186	5	0	0.013089	95.0172	275.418	NA	1.28428	1.35508	NA
3	179604915	rs35399127	ALC:ATF/SPB/LM:VERS/D	5.98423	1.03698e-06	174.493	9.15797e-06	1.00637	186	5	0	0.013089	95.0172	275.418	NA	1.28428	1.35508	NA
3	179604915	rs35399127	ALC:ATF/SPB/LM:VERS/A	5.78432	1.64318e-06	172.009	2.34639e-05	0.980795	186	5	0	0.013089	95.0172	275.418	NA	1.28428	1.35508	NA
10	97524652	rs11189258	ALC:ATF/SPB:F/GLM:VERS/R	6.7704	2.72693e-05	63.6529	1.69667e-07	0.823829	5	14	7	0.538462	60.4	46.2857	113.2	2.32924	2.55905	2.75458
10	97524652	rs11189258	ALC:ATF/SPB:F/GLM:VERS/CD	6.67303	9.31704e-05	30.0447	2.1231e-07	0.461101	5	14	7	0.538462	60.4	46.2857	113.2	2.32924	2.55905	2.75458
1	111973833	rs3017627	ALC:PACS/SPB/GLM/CD	6.76722	5.75896e-07	3.03219	1.70916e-07	0.629204	153	37	2	0.106771	3.03922	7.18919	0	0.912068	1.07313	NA
1	111973833	rs3017627	ALC:PACS/SPB:M/GLM/CD	6.47942	1.61718e-06	2.93161	3.31572e-07	0.617148	133	31	2	0.105422	2.96992	7.19355	0	0.946413	1.06031	NA
1	111973833	rs3017627	ALC:PACS/SPB/LM/CD	6.23966	5.75896e-07	3.03219	1.70916e-07	0.629204	153	37	2	0.106771	3.03922	7.18919	0	0.912068	1.07313	NA
1	111973833	rs3017627	ALC:PACS/SPB/GLM/D	5.94876	1.40949e-06	3.7813	1.12524e-06	0.808335	153	37	2	0.106771	3.03922	7.18919	0	0.912068	1.07313	NA
1	111973833	rs3017627	ALC:PACS/SPB/LM/D	5.85094	1.40949e-06	3.7813	1.12524e-06	0.808335	153	37	2	0.106771	3.03922	7.18919	0	0.912068	1.07313	NA
1	111973833	rs3017627	ALC:PACS/SPB:M/GLM/D	5.526	4.7698e-06	3.78765	2.97848e-06	0.822128	133	31	2	0.105422	2.96992	7.19355	0	0.946413	1.06031	NA
5	151217492	rs919727	ALC:PACS/SPB/LM/R	6.27789	5.27358e-07	12.7249	0.000107785	1.50993	149	40	3	0.119792	3.5302	3.9	16.3333	0.851288	1.01341	1.48896
5	151217492	rs919727	ALC:PACS/SPB/LM/CD	5.50165	3.15027e-06	1.9245	0.000519556	0.428945	149	40	3	0.119792	3.5302	3.9	16.3333	0.851288	1.01341	1.48896
11	92185705	rs72966342	ALC:PACS/SPB/LM/R	6.27789	5.27358e-07	12.7249	8.33519e-05	1.50993	163	26	3	0.0833333	3.58282	3.76923	16.3333	0.936	0.754078	1.20302
11	92185705	rs72966342	ALC:PACS/SPB/LM/CD	5.45856	3.47887e-06	2.27041	0.000430973	0.469263	163	26	3	0.0833333	3.58282	3.76923	16.3333	0.936	0.754078	1.20302
11	10357216	rs7113115	ALC:VAS/SPB:F/GLM/CD	6.76284	2.31424e-06	1.12667	1.72649e-07	0.531563	11	12	3	0.346154	1.90909	1.08333	6	1.68027	1.20325	3.4641
11	10357216	rs7113115	ALC:VAS/SPB:F/GLM/R	6.18759	1.26814e-06	4.52174	6.49251e-07	1.40089	11	12	3	0.346154	1.90909	1.08333	6	1.68027	1.20325	3.4641
3	143243233	rs961413	ALC:ATF/SPB/GLM:VERS/R	6.75865	3.86407e-07	115.163	1.7432e-07	0.808594	106	73	13	0.257812	89.0889	98.2695	207.631	1.4045	1.39387	1.10965
3	143243233	rs961413	ALC:ATF/SPB/LM:VERS/R	6.41296	3.86407e-07	115.163	1.7432e-07	0.808594	106	73	13	0.257812	89.0889	98.2695	207.631	1.4045	1.39387	1.10965
3	143243233	rs961413	ALC:ATF/SPB:M/GLM:VERS/R	6.30492	9.90119e-07	119.288	4.95547e-07	0.786374	89	65	12	0.268072	93.6755	101.57	219.558	1.42385	1.38684	1.15434
3	143243233	rs961413	ALC:ATF/SPB/GLM:VERS/CD	6.2079	1.59205e-06	36.9097	6.19591e-07	0.339386	106	73	13	0.257812	89.0889	98.2695	207.631	1.4045	1.39387	1.10965
3	143243233	rs961413	ALC:ATF/SPB/LM:VERS/CD	5.79804	1.59205e-06	36.9097	6.19591e-07	0.339386	106	73	13	0.257812	89.0889	98.2695	207.631	1.4045	1.39387	1.10965
3	143243233	rs961413	ALC:ATF/SPB:M/GLM:VERS/CD	5.60779	5.12944e-06	37.2324	2.46726e-06	0.324432	89	65	12	0.268072	93.6755	101.57	219.558	1.42385	1.38684	1.15434
13	114238728	rs79663105	ALC:ATF/SPB:M/GLM:VERS/D	6.75419	1.14784e-06	92.5382	1.7612e-07	0.668377	145	20	1	0.0662651	93.5498	197.659	56	1.48207	1.18915	NA
13	114238728	rs79663105	ALC:ATF/SPB:M/GLM:VERS/CD	6.30477	2.8293e-06	79.2063	4.95716e-07	0.581496	145	20	1	0.0662651	93.5498	197.659	56	1.48207	1.18915	NA
11	92145973	rs72962379	ALC:PACS/SPB/LM/R	6.26715	5.40563e-07	12.7376	8.56264e-05	1.51346	163	25	3	0.0811518	3.58282	3.68	16.3333	0.936	0.724359	1.20302
11	92145973	rs72962379	ALC:PACS/SPB/LM/CD	5.44114	3.62123e-06	2.26253	0.000455153	0.467378	163	25	3	0.0811518	3.58282	3.68	16.3333	0.936	0.724359	1.20302
1	65588320	rs61781283	ALC:ATF/SPB/LM:VERS/R	6.75107	1.77391e-07	413.67	0.000156554	1.49663	137	51	1	0.140212	96.2131	101.629	533	1.29486	1.14451	NA
1	65588320	rs61781283	ALC:ATF/SPB/LM:VERS/CD	5.90549	1.24312e-06	18.2136	0.000815054	0.168639	137	51	1	0.140212	96.2131	101.629	533	1.29486	1.14451	NA
15	77566227	rs11630856	ALC:ATF/SPB:M/GLM:VERS/R	6.74494	7.07623e-07	107.101	1.79912e-07	0.727467	72	75	16	0.328221	95.0764	94.5869	208.398	1.50665	1.4197	1.14985
15	77566227	rs11630856	ALC:ATF/SPB:M/GLM:VERS/CD	5.87703	4.74599e-06	33.2576	1.32731e-06	0.295219	72	75	16	0.328221	95.0764	94.5869	208.398	1.50665	1.4197	1.14985
4	164437286	rs116336997	ALC:VAS/SPB/LM/CD	6.73757	1.82989e-07	1.93429	7.52026e-07	0.875524	173	19	0	0.0494792	1.3815	3.31579	NA	1.06244	1.26278	NA
4	164437286	rs116336997	ALC:VAS/SPB/LM/D	6.73757	1.82989e-07	1.93429	7.52026e-07	0.875524	173	19	0	0.0494792	1.3815	3.31579	NA	1.06244	1.26278	NA
4	164437286	rs116336997	ALC:VAS/SPB/LM/A	6.23742	5.78869e-07	1.8336	6.67591e-06	0.805174	173	19	0	0.0494792	1.3815	3.31579	NA	1.06244	1.26278	NA
4	164437286	rs116336997	ALC:VAS/SPB/GLM/CD	6.12377	1.82989e-07	1.93429	7.52026e-07	0.875524	173	19	0	0.0494792	1.3815	3.31579	NA	1.06244	1.26278	NA
4	164437286	rs116336997	ALC:VAS/SPB/GLM/D	6.12377	1.82989e-07	1.93429	7.52026e-07	0.875524	173	19	0	0.0494792	1.3815	3.31579	NA	1.06244	1.26278	NA
2	174759869	rs1376865	ALC:ATF/SPB/LM:VERS/R	6.73649	1.83445e-07	413.125	0.000158469	1.49207	150	40	1	0.109948	98.7562	93.7965	533	1.19182	1.57858	NA
2	174759869	rs1376865	ALC:ATF/SPB/LM:VERS/CD	5.91213	1.22425e-06	17.2184	0.000763526	0.160359	150	40	1	0.109948	98.7562	93.7965	533	1.19182	1.57858	NA
6	3423700	rs12662630	ALC:ATF/SPB/LM:VERS/R	6.73649	1.83445e-07	413.125	0.000158469	1.49207	174	16	1	0.0471204	98.9413	84.3438	533	1.23239	1.56973	NA
6	3423700	rs12662630	ALC:ATF/SPB/LM:VERS/CD	5.99006	1.02316e-06	32.1128	0.000594541	0.267523	174	16	1	0.0471204	98.9413	84.3438	533	1.23239	1.56973	NA
10	23105947	rs2147941	ALC:OCSD/SPB:F/GLM/CD	6.73405	0.000414809	-18.5113	1.8448e-07	-2.39495	19	7	0	0.134615	20.3684	1.85714	NA	1.73934	0.711684	NA
10	23105947	rs2147941	ALC:OCSD/SPB:F/GLM/D	6.73405	0.000414809	-18.5113	1.8448e-07	-2.39495	19	7	0	0.134615	20.3684	1.85714	NA	1.73934	0.711684	NA
6	89045039	rs855574	ALC:ATF/SPB/LM:VERS/R	6.73341	1.84753e-07	293.977	4.93978e-05	1.24413	140	50	2	0.140625	95.1026	103.519	413	1.26255	1.25744	1.98663
6	89045039	rs855574	ALC:ATF/SPB/LM:VERS/CD	6.01744	9.60636e-07	31.8423	0.000190407	0.28296	140	50	2	0.140625	95.1026	103.519	413	1.26255	1.25744	1.98663
11	6254690	rs79368077	ALC:ATF/SPB/LM:VERS/CD	5.80564	1.56443e-06	172.678	1.31528e-05	0.993281	187	5	0	0.0130208	95.9524	274.64	NA	1.27806	1.37331	NA
11	6254690	rs79368077	ALC:ATF/SPB/LM:VERS/D	5.80564	1.56443e-06	172.678	1.31528e-05	0.993281	187	5	0	0.0130208	95.9524	274.64	NA	1.27806	1.37331	NA
11	6254690	rs79368077	ALC:ATF/SPB/LM:VERS/A	5.61888	2.40503e-06	170.24	3.07201e-05	0.968408	187	5	0	0.0130208	95.9524	274.64	NA	1.27806	1.37331	NA
3	131391588	rs6439293	ALC:TAI/SPB:F/GLM/CD	6.727	5.48253e-05	-16.75	1.87501e-07	-0.418302	22	4	0	0.0769231	49	32.25	NA	7.43547	8.75037	NA
3	131391588	rs6439293	ALC:TAI/SPB:F/GLM/D	6.727	5.48253e-05	-16.75	1.87501e-07	-0.418302	22	4	0	0.0769231	49	32.25	NA	7.43547	8.75037	NA
3	131419464	rs4854896	ALC:TAI/SPB:F/GLM/CD	6.727	5.48253e-05	-16.75	1.87501e-07	-0.418302	22	4	0	0.0769231	49	32.25	NA	7.43547	8.75037	NA
3	131419464	rs4854896	ALC:TAI/SPB:F/GLM/D	6.727	5.48253e-05	-16.75	1.87501e-07	-0.418302	22	4	0	0.0769231	49	32.25	NA	7.43547	8.75037	NA
19	55921837	rs160104	ALC:TAI/SPB:F/GLM/R	6.727	5.48253e-05	-16.75	1.87501e-07	-0.418302	10	12	4	0.384615	47.8	50	32.25	6.95102	7.73192	8.75037
19	55921837	rs160104	ALC:TAI/SPB:F/GLM/CD	5.93905	0.000254732	-5.58537	1.15066e-06	-0.122255	10	12	4	0.384615	47.8	50	32.25	6.95102	7.73192	8.75037
20	47665981	rs2076545	ALC:TAI/SPB:F/GLM/R	6.727	5.48253e-05	-16.75	1.87501e-07	-0.418302	11	11	4	0.365385	50.4545	47.5455	32.25	8.54392	6.61422	8.75037
20	47665981	rs2076545	ALC:TAI/SPB:F/GLM/CD	6.14775	0.000197821	-7.70381	7.1162e-07	-0.170883	11	11	4	0.365385	50.4545	47.5455	32.25	8.54392	6.61422	8.75037
14	49159306	rs75064852	ALC:PACS/SPB/LM/A	6.14315	7.19197e-07	5.43324	1.33495e-05	0.925568	176	15	1	0.0442708	3.34659	8.73333	11	0.893711	1.06642	NA
14	49159306	rs75064852	ALC:PACS/SPB:M/GLM/D	5.94302	2.84054e-07	5.70167	1.14019e-06	1.02846	150	15	1	0.0512048	3.17333	8.73333	11	0.927681	1.06642	NA
14	49159306	rs75064852	ALC:PACS/SPB/LM/D	5.90003	1.25885e-06	5.52841	7.70613e-06	0.975296	176	15	1	0.0442708	3.34659	8.73333	11	0.893711	1.06642	NA
14	49159306	rs75064852	ALC:PACS/SPB:M/GLM/A	5.38394	1.9089e-07	5.5619	4.13107e-06	0.962307	150	15	1	0.0512048	3.17333	8.73333	11	0.927681	1.06642	NA
18	77255709	rs12454015	ALC:TAI/SPB:F/GLM/D	6.71789	2.69717e-05	13.0523	1.91473e-07	0.296014	9	16	1	0.346154	37.8889	50.625	56	6.09755	8.25786	NA
18	77255709	rs12454015	ALC:TAI/SPB:F/GLM/CD	5.91317	0.000128164	11.4592	1.22132e-06	0.248416	9	16	1	0.346154	37.8889	50.625	56	6.09755	8.25786	NA
1	63072379	rs77665570	ALC:PACS/SPB/LM/CD	6.7161	1.92266e-07	10.2599	2.29591e-05	1.36051	187	5	0	0.0130208	3.54011	13.8	NA	0.887948	1.42185	NA
1	63072379	rs77665570	ALC:PACS/SPB/LM/D	6.7161	1.92266e-07	10.2599	2.29591e-05	1.36051	187	5	0	0.0130208	3.54011	13.8	NA	0.887948	1.42185	NA
1	63072379	rs77665570	ALC:PACS/SPB/LM/A	6.45618	3.49799e-07	10.1245	5.81866e-05	1.32299	187	5	0	0.0130208	3.54011	13.8	NA	0.887948	1.42185	NA
15	62473723	rs117845926	ALC:PACS/SPB/LM/CD	6.7161	1.92266e-07	10.2599	2.71268e-05	1.36051	187	5	0	0.0130208	3.54011	13.8	NA	0.87704	1.5861	NA
15	62473723	rs117845926	ALC:PACS/SPB/LM/D	6.7161	1.92266e-07	10.2599	2.71268e-05	1.36051	187	5	0	0.0130208	3.54011	13.8	NA	0.87704	1.5861	NA
15	62473723	rs117845926	ALC:PACS/SPB/LM/A	6.45618	3.49799e-07	10.1245	6.21901e-05	1.32299	187	5	0	0.0130208	3.54011	13.8	NA	0.87704	1.5861	NA
12	51081821	rs77706234	ALC:ATF/SPB:F/GLM:VERS/CD	6.71232	1.31769e-05	-8.97879	1.93947e-07	-0.13488	12	13	1	0.288462	82.825	43.2692	186	2.91352	2.14901	NA
12	51143413	rs2730648	ALC:ATF/SPB:F/GLM:VERS/CD	6.71232	1.31769e-05	-8.97879	1.93947e-07	-0.13488	12	13	1	0.288462	82.825	43.2692	186	2.91352	2.14901	NA
3	162395328	rs4393923	ALC:TAI/SPB:F/GLM/A	6.71197	6.23445e-06	-13.1421	1.94104e-07	-0.314535	19	5	2	0.173077	49.8421	40	30	7.6081	6.44658	10.6066
3	162395328	rs4393923	ALC:TAI/SPB:F/GLM/CD	5.76309	0.000281821	-9.89494	1.72548e-06	-0.240018	19	5	2	0.173077	49.8421	40	30	7.6081	6.44658	10.6066
19	47086638	rs2303108	ALC:ATF/SPB/GLM:VERS/D	6.71068	6.51634e-06	-52.5232	1.94679e-07	-0.512174	81	82	29	0.364583	132.604	77.4382	76.7403	1.19822	1.67841	1.55524
19	47086638	rs2303108	ALC:ATF/SPB:M/GLM:VERS/D	5.99816	2.68685e-05	-54.2134	1.00424e-06	-0.505858	72	66	28	0.36747	139.415	80.9929	78.2311	1.21905	1.66702	1.57791
19	47086638	rs2303108	ALC:ATF/SPB/GLM:VERS/CD	5.85802	3.89332e-05	-31.7018	1.38669e-06	-0.340013	81	82	29	0.364583	132.604	77.4382	76.7403	1.19822	1.67841	1.55524
4	24338888	rs11938023	ALC:ATF/SPB/LM:VERS/R	6.71018	1.94904e-07	148.526	5.89514e-07	0.907397	117	67	8	0.216146	91.9097	97.9919	249.675	1.39595	1.27097	1.24487
4	24338888	rs11938023	ALC:ATF/SPB/LM:VERS/CD	6.24746	5.65634e-07	40.796	9.23753e-07	0.36066	117	67	8	0.216146	91.9097	97.9919	249.675	1.39595	1.27097	1.24487
4	24338888	rs11938023	ALC:ATF/SPB/GLM:VERS/R	6.22951	1.94904e-07	148.526	5.89514e-07	0.907397	117	67	8	0.216146	91.9097	97.9919	249.675	1.39595	1.27097	1.24487
4	24338888	rs11938023	ALC:ATF/SPB/GLM:VERS/CD	6.03444	5.65634e-07	40.796	9.23753e-07	0.36066	117	67	8	0.216146	91.9097	97.9919	249.675	1.39595	1.27097	1.24487
4	24338888	rs11938023	ALC:ATF/SPB:M/GLM:VERS/R	5.88975	2.87e-07	161.582	1.289e-06	0.896278	99	60	7	0.222892	96.8023	101.191	274.143	1.42236	1.25753	1.34828
4	24338888	rs11938023	ALC:ATF/SPB:M/GLM:VERS/CD	5.53601	1.07719e-06	42.2059	2.91068e-06	0.349655	99	60	7	0.222892	96.8023	101.191	274.143	1.42236	1.25753	1.34828
9	84937049	rs12340212	ALC:ATF/SPB/LM:VERS/R	6.70394	1.97723e-07	413.125	0.000164879	1.49207	142	47	1	0.128947	101.983	85.2702	533	1.30184	1.08165	NA
9	84937049	rs12340212	ALC:ATF/SPB/LM:VERS/CD	6.13843	7.27057e-07	5.52049	0.000402664	0.0538712	142	47	1	0.128947	101.983	85.2702	533	1.30184	1.08165	NA
16	74292331	rs11648762	ALC:ATF/SPB/LM:VERS/R	6.30443	4.96099e-07	180.249	3.32782e-06	1.0219	132	55	5	0.169271	99.6386	86.4364	282	1.42501	1.13737	1.16142
16	74292331	rs11648762	ALC:ATF/SPB:M/GLM:VERS/R	5.89444	2.00914e-07	212.947	1.27514e-06	1.11706	118	44	4	0.156627	102.727	95.1159	316.75	1.42786	1.15768	1.19248
16	74292331	rs11648762	ALC:ATF/SPB/LM:VERS/CD	5.66178	2.17882e-06	19.9404	1.21927e-05	0.184865	132	55	5	0.169271	99.6386	86.4364	282	1.42501	1.13737	1.16142
16	74292331	rs11648762	ALC:ATF/SPB/GLM:VERS/R	5.47784	4.96099e-07	180.249	3.32782e-06	1.0219	132	55	5	0.169271	99.6386	86.4364	282	1.42501	1.13737	1.16142
1	18691361	rs2743208	ALC:ATF/SPB/LM:VERS/CD	6.69651	2.01135e-07	46.1035	6.14814e-05	0.393776	149	40	1	0.110526	93.1572	119.909	533	1.33473	1.14455	NA
1	18691361	rs2743208	ALC:ATF/SPB/LM:VERS/R	6.63326	2.32672e-07	411.136	0.000174506	1.47562	149	40	1	0.110526	93.1572	119.909	533	1.33473	1.14455	NA
4	137852573	rs115088286	ALC:ATF/SPB/LM:VERS/R	6.69562	2.0155e-07	412.022	0.000163118	1.48292	177	13	1	0.039267	99.0943	83.0462	533	1.22181	2.77751	NA
4	137852573	rs115088286	ALC:ATF/SPB/LM:VERS/CD	5.88484	1.30365e-06	43.8383	0.000749614	0.352258	177	13	1	0.039267	99.0943	83.0462	533	1.22181	2.77751	NA
10	73388957	rs76362511	ALC:ATF/SPB/LM:VERS/R	6.69562	2.0155e-07	412.022	0.000163118	1.48292	158	32	1	0.0890052	94.1335	117.069	533	1.21714	1.3945	NA
10	73388957	rs76362511	ALC:ATF/SPB/LM:VERS/CD	6.12444	7.5087e-07	39.5845	0.000442401	0.328252	158	32	1	0.0890052	94.1335	117.069	533	1.21714	1.3945	NA
4	64546976	rs17663093	ALC:ATF/SPB:F/GLM:VERS/CD	6.69219	9.16094e-06	15.7365	2.03146e-07	0.221928	15	9	2	0.25	69.1	41.8778	164.5	2.69716	2.04067	5.41019
1	4111726	rs10492944	ALC:ATF/SPB/LM:VERS/R	6.68958	2.04372e-07	412.022	0.000165119	1.48292	156	35	1	0.0963542	97.4442	102.343	533	1.23836	1.28558	NA
1	4111726	rs10492944	ALC:ATF/SPB/LM:VERS/CD	5.8614	1.37593e-06	26.6498	0.000823494	0.235847	156	35	1	0.0963542	97.4442	102.343	533	1.23836	1.28558	NA
1	30513029	rs72650548	ALC:ATF/SPB/LM:VERS/R	6.68958	2.04372e-07	412.022	0.000165119	1.48292	175	16	1	0.046875	100.065	79.4938	533	1.23317	1.98713	NA
1	30513029	rs72650548	ALC:ATF/SPB/LM:VERS/CD	5.99299	1.01627e-06	29.9066	0.000521858	0.254067	175	16	1	0.046875	100.065	79.4938	533	1.23317	1.98713	NA
1	63629371	rs855313	ALC:ATF/SPB/LM:VERS/R	6.68958	2.04372e-07	412.022	0.000165119	1.48292	150	41	1	0.111979	96.9339	103.493	533	1.20569	1.42354	NA
1	63629371	rs855313	ALC:ATF/SPB/LM:VERS/CD	5.89943	1.26058e-06	26.6874	0.000758901	0.24033	150	41	1	0.111979	96.9339	103.493	533	1.20569	1.42354	NA
1	107148070	rs72697660	ALC:ATF/SPB/LM:VERS/R	6.68958	2.04372e-07	412.022	0.000165119	1.48292	183	8	1	0.0260417	97.6174	114.912	533	1.23875	1.45934	NA
1	107148070	rs72697660	ALC:ATF/SPB/LM:VERS/CD	5.91695	1.21073e-06	80.188	0.000717573	0.515923	183	8	1	0.0260417	97.6174	114.912	533	1.23875	1.45934	NA
1	158776888	rs41273541	ALC:ATF/SPB/LM:VERS/R	6.68958	2.04372e-07	412.022	0.000165119	1.48292	175	16	1	0.046875	100.359	76.275	533	1.23278	2.47746	NA
1	158776888	rs41273541	ALC:ATF/SPB/LM:VERS/CD	6.13089	7.39799e-07	24.532	0.000324047	0.209711	175	16	1	0.046875	100.359	76.275	533	1.23278	2.47746	NA
1	158777057	rs16841094	ALC:ATF/SPB/LM:VERS/R	6.68958	2.04372e-07	412.022	0.000165119	1.48292	163	28	1	0.078125	102.905	71.7786	533	1.23343	2.35235	NA
1	158777057	rs16841094	ALC:ATF/SPB/LM:VERS/CD	6.61969	2.40055e-07	2.21749	6.09056e-05	0.0214662	163	28	1	0.078125	102.905	71.7786	533	1.23343	2.35235	NA
1	196022171	rs77742297	ALC:ATF/SPB/LM:VERS/R	6.68958	2.04372e-07	412.022	0.000165119	1.48292	186	5	1	0.0182292	97.7112	121.8	533	1.23245	2.4086	NA
1	196022171	rs77742297	ALC:ATF/SPB/LM:VERS/CD	5.86217	1.37351e-06	98.1439	0.000839904	0.549723	186	5	1	0.0182292	97.7112	121.8	533	1.23245	2.4086	NA
1	220783482	rs57298117	ALC:ATF/SPB/LM:VERS/R	6.68958	2.04372e-07	412.022	0.000165119	1.48292	183	8	1	0.0260417	99.5207	71.375	533	1.24568	2.09077	NA
1	220783482	rs57298117	ALC:ATF/SPB/LM:VERS/CD	6.09845	7.97172e-07	49.7505	0.000375318	0.357649	183	8	1	0.0260417	99.5207	71.375	533	1.24568	2.09077	NA
1	220786175	rs868494	ALC:ATF/SPB/LM:VERS/R	6.68958	2.04372e-07	412.022	0.000165119	1.48292	183	8	1	0.0260417	99.5207	71.375	533	1.24568	2.09077	NA
1	220786175	rs868494	ALC:ATF/SPB/LM:VERS/CD	6.09845	7.97172e-07	49.7505	0.000375318	0.357649	183	8	1	0.0260417	99.5207	71.375	533	1.24568	2.09077	NA
1	232391209	rs12035677	ALC:ATF/SPB/LM:VERS/R	6.68958	2.04372e-07	412.022	0.000165119	1.48292	165	26	1	0.0729167	99.9793	87.95	533	1.2543	1.21652	NA
1	232391209	rs12035677	ALC:ATF/SPB/LM:VERS/CD	6.00355	9.91851e-07	17.3231	0.000560521	0.154422	165	26	1	0.0729167	99.9793	87.95	533	1.2543	1.21652	NA
1	232414325	rs12047962	ALC:ATF/SPB/LM:VERS/R	6.68958	2.04372e-07	412.022	0.000165119	1.48292	184	7	1	0.0234375	98.4619	95.1857	533	1.25814	0.993904	NA
1	232414325	rs12047962	ALC:ATF/SPB/LM:VERS/CD	5.89677	1.26832e-06	66.8401	0.00078685	0.430868	184	7	1	0.0234375	98.4619	95.1857	533	1.25814	0.993904	NA
1	232463443	rs10910527	ALC:ATF/SPB/LM:VERS/R	6.68958	2.04372e-07	412.022	0.000165119	1.48292	172	19	1	0.0546875	97.2238	108.463	533	1.23194	1.39573	NA
1	232463443	rs10910527	ALC:ATF/SPB/LM:VERS/CD	5.86793	1.3554e-06	42.2473	0.000810055	0.331207	172	19	1	0.0546875	97.2238	108.463	533	1.23194	1.39573	NA
1	247794567	rs72777524	ALC:ATF/SPB/LM:VERS/R	6.68958	2.04372e-07	412.022	0.000165119	1.48292	185	6	1	0.0208333	97.6664	119.167	533	1.23753	1.61637	NA
1	247794567	rs72777524	ALC:ATF/SPB/LM:VERS/CD	5.93256	1.16799e-06	95.2305	0.000689664	0.565813	185	6	1	0.0208333	97.6664	119.167	533	1.23753	1.61637	NA
1	247859436	rs59539472	ALC:ATF/SPB/LM:VERS/R	6.68958	2.04372e-07	412.022	0.000165119	1.48292	169	22	1	0.0625	99.4319	89.9682	533	1.23008	1.49129	NA
1	247859436	rs59539472	ALC:ATF/SPB/LM:VERS/CD	5.90332	1.24934e-06	25.9063	0.00071025	0.224119	169	22	1	0.0625	99.4319	89.9682	533	1.23008	1.49129	NA
1	247908000	rs10449729	ALC:ATF/SPB/LM:VERS/R	6.68958	2.04372e-07	412.022	0.000165119	1.48292	185	6	1	0.0208333	98.514	93.0333	533	1.2399	1.74729	NA
1	247908000	rs10449729	ALC:ATF/SPB/LM:VERS/CD	5.85591	1.39345e-06	78.9547	0.000831255	0.495365	185	6	1	0.0208333	98.514	93.0333	533	1.2399	1.74729	NA
2	45820498	rs78867046	ALC:ATF/SPB/LM:VERS/R	6.68958	2.04372e-07	412.022	0.000165119	1.48292	181	10	1	0.03125	98.3441	98.3	533	1.23498	1.58847	NA
2	45820498	rs78867046	ALC:ATF/SPB/LM:VERS/CD	5.84621	1.42493e-06	58.8288	0.000857378	0.417048	181	10	1	0.03125	98.3441	98.3	533	1.23498	1.58847	NA
2	65748797	rs72819505	ALC:ATF/SPB/LM:VERS/R	6.68958	2.04372e-07	412.022	0.000165119	1.48292	183	8	1	0.0260417	98.9601	84.2	533	1.24763	1.30405	NA
2	65748797	rs72819505	ALC:ATF/SPB/LM:VERS/CD	5.92134	1.19856e-06	58.7166	0.000678356	0.407706	183	8	1	0.0260417	98.9601	84.2	533	1.24763	1.30405	NA
2	101502599	rs2310115	ALC:ATF/SPB/LM:VERS/R	6.68958	2.04372e-07	412.022	0.000165119	1.48292	176	15	1	0.0442708	100.006	78.82	533	1.24589	1.43629	NA
2	101502599	rs2310115	ALC:ATF/SPB/LM:VERS/CD	6.15211	7.0452e-07	25.4248	0.000332847	0.210402	176	15	1	0.0442708	100.006	78.82	533	1.24589	1.43629	NA
2	152073627	rs79199481	ALC:ATF/SPB/LM:VERS/R	6.68958	2.04372e-07	412.022	0.000165119	1.48292	184	7	1	0.0234375	97.4092	122.857	533	1.24573	1.31208	NA
2	152073627	rs79199481	ALC:ATF/SPB/LM:VERS/CD	6.12899	7.43042e-07	97.4577	0.000403274	0.600369	184	7	1	0.0234375	97.4092	122.857	533	1.24573	1.31208	NA
2	152349955	rs80206195	ALC:ATF/SPB/LM:VERS/R	6.68958	2.04372e-07	412.022	0.000165119	1.48292	184	7	1	0.0234375	97.4092	122.857	533	1.24573	1.31208	NA
2	152349955	rs80206195	ALC:ATF/SPB/LM:VERS/CD	6.12899	7.43042e-07	97.4577	0.000403274	0.600369	184	7	1	0.0234375	97.4092	122.857	533	1.24573	1.31208	NA
2	174764872	rs16862847	ALC:ATF/SPB/LM:VERS/R	6.68958	2.04372e-07	412.022	0.000165119	1.48292	152	39	1	0.106771	99.5752	93.5349	533	1.20147	1.55446	NA
2	174764872	rs16862847	ALC:ATF/SPB/LM:VERS/CD	5.8845	1.30466e-06	16.1351	0.000751244	0.149279	152	39	1	0.106771	99.5752	93.5349	533	1.20147	1.55446	NA
2	174766522	rs1376869	ALC:ATF/SPB/LM:VERS/R	6.68958	2.04372e-07	412.022	0.000165119	1.48292	151	40	1	0.109375	99.5459	93.7965	533	1.19714	1.57858	NA
2	174766522	rs1376869	ALC:ATF/SPB/LM:VERS/CD	5.8737	1.33752e-06	16.5969	0.000776729	0.154013	151	40	1	0.109375	99.5459	93.7965	533	1.19714	1.57858	NA
2	234826264	rs114583757	ALC:ATF/SPB/LM:VERS/R	6.68958	2.04372e-07	412.022	0.000165119	1.48292	178	13	1	0.0390625	98.278	99.2154	533	1.24636	1.25198	NA
2	234826264	rs114583757	ALC:ATF/SPB/LM:VERS/CD	5.84787	1.41949e-06	47.8981	0.000852904	0.359305	178	13	1	0.0390625	98.278	99.2154	533	1.24636	1.25198	NA
3	59593836	rs6796064	ALC:ATF/SPB/LM:VERS/R	6.68958	2.04372e-07	412.022	0.000165119	1.48292	155	36	1	0.0989583	98.6208	97.1408	533	1.22899	1.33912	NA
3	59593836	rs6796064	ALC:ATF/SPB/LM:VERS/CD	5.85696	1.39009e-06	19.6831	0.000825013	0.177562	155	36	1	0.0989583	98.6208	97.1408	533	1.22899	1.33912	NA
3	59670393	rs1345175	ALC:ATF/SPB/LM:VERS/R	6.68958	2.04372e-07	412.022	0.000165119	1.48292	165	26	1	0.0729167	98.3886	98.045	533	1.2303	1.37531	NA
3	59670393	rs1345175	ALC:ATF/SPB/LM:VERS/CD	5.85817	1.3862e-06	25.7611	0.00082085	0.220785	165	26	1	0.0729167	98.3886	98.045	533	1.2303	1.37531	NA
3	108057799	rs12695175	ALC:ATF/SPB/LM:VERS/R	6.68958	2.04372e-07	412.022	0.000165119	1.48292	146	45	1	0.122396	99.7143	93.8889	533	1.34593	1.01181	NA
3	108057799	rs12695175	ALC:ATF/SPB/LM:VERS/CD	5.96388	1.08672e-06	10.1208	0.000658428	0.0942462	146	45	1	0.122396	99.7143	93.8889	533	1.34593	1.01181	NA
3	108845937	rs76239230	ALC:ATF/SPB/LM:VERS/R	6.68958	2.04372e-07	412.022	0.000165119	1.48292	164	27	1	0.0755208	96.5829	109.026	533	1.24939	1.24861	NA
3	108845937	rs76239230	ALC:ATF/SPB/LM:VERS/CD	5.85107	1.40907e-06	30.7149	0.000849991	0.252112	164	27	1	0.0755208	96.5829	109.026	533	1.24939	1.24861	NA
3	124775013	rs74708445	ALC:ATF/SPB/LM:VERS/R	6.68958	2.04372e-07	412.022	0.000165119	1.48292	177	14	1	0.0416667	98.3412	98.35	533	1.23478	1.45319	NA
3	124775013	rs74708445	ALC:ATF/SPB/LM:VERS/CD	5.8465	1.42396e-06	45.8953	0.0008589	0.351848	177	14	1	0.0416667	98.3412	98.35	533	1.23478	1.45319	NA
3	124796799	rs2291090	ALC:ATF/SPB/LM:VERS/R	6.68958	2.04372e-07	412.022	0.000165119	1.48292	182	9	1	0.0286458	99.5307	74.3	533	1.24052	2.89047	NA
3	124796799	rs2291090	ALC:ATF/SPB/LM:VERS/CD	6.12073	7.573e-07	44.0247	0.000354843	0.323728	182	9	1	0.0286458	99.5307	74.3	533	1.24052	2.89047	NA
3	124816788	rs3772836	ALC:ATF/SPB/LM:VERS/R	6.68958	2.04372e-07	412.022	0.000165119	1.48292	179	12	1	0.0364583	99.9184	74.825	533	1.23619	3.22514	NA
3	124816788	rs3772836	ALC:ATF/SPB/LM:VERS/CD	6.14514	7.15909e-07	32.6668	0.0003192	0.260335	179	12	1	0.0364583	99.9184	74.825	533	1.23619	3.22514	NA
3	126800607	rs116268342	ALC:ATF/SPB/LM:VERS/R	6.68958	2.04372e-07	412.022	0.000165119	1.48292	182	9	1	0.0286458	99.4527	75.8778	533	1.24583	1.61343	NA
3	126800607	rs116268342	ALC:ATF/SPB/LM:VERS/CD	6.09031	8.12252e-07	45.1793	0.000393411	0.330707	182	9	1	0.0286458	99.4527	75.8778	533	1.24583	1.61343	NA
3	160744575	rs9837945	ALC:ATF/SPB/LM:VERS/R	6.68958	2.04372e-07	412.022	0.000165119	1.48292	175	16	1	0.046875	96.4588	118.938	533	1.25268	1.2455	NA
3	160744575	rs9837945	ALC:ATF/SPB/LM:VERS/CD	6.02441	9.45352e-07	57.0972	0.000543182	0.421107	175	16	1	0.046875	96.4588	118.938	533	1.25268	1.2455	NA
3	160763505	rs1378662	ALC:ATF/SPB/LM:VERS/R	6.68958	2.04372e-07	412.022	0.000165119	1.48292	175	16	1	0.046875	96.4588	118.938	533	1.25268	1.2455	NA
3	160763505	rs1378662	ALC:ATF/SPB/LM:VERS/CD	6.02441	9.45352e-07	57.0972	0.000543182	0.421107	175	16	1	0.046875	96.4588	118.938	533	1.25268	1.2455	NA
3	166546352	rs73025382	ALC:ATF/SPB/LM:VERS/R	6.68958	2.04372e-07	412.022	0.000165119	1.48292	179	12	1	0.0364583	98.9374	89.4583	533	1.2238	2.76633	NA
3	166546352	rs73025382	ALC:ATF/SPB/LM:VERS/CD	5.85046	1.41104e-06	50.5884	0.00083916	0.389013	179	12	1	0.0364583	98.9374	89.4583	533	1.2238	2.76633	NA
3	166687071	rs57019431	ALC:ATF/SPB/LM:VERS/R	6.68958	2.04372e-07	412.022	0.000165119	1.48292	180	11	1	0.0338542	99.0933	86.0455	533	1.22885	2.70056	NA
3	166687071	rs57019431	ALC:ATF/SPB/LM:VERS/CD	5.8731	1.33938e-06	50.2159	0.000773578	0.380985	180	11	1	0.0338542	99.0933	86.0455	533	1.22885	2.70056	NA
3	166741058	rs2030623	ALC:ATF/SPB/LM:VERS/R	6.68958	2.04372e-07	412.022	0.000165119	1.48292	178	13	1	0.0390625	97.4033	111.192	533	1.20867	2.48063	NA
3	166741058	rs2030623	ALC:ATF/SPB/LM:VERS/CD	5.98457	1.03617e-06	63.424	0.000612025	0.46389	178	13	1	0.0390625	97.4033	111.192	533	1.20867	2.48063	NA
3	166775382	rs112196984	ALC:ATF/SPB/LM:VERS/R	6.68958	2.04372e-07	412.022	0.000165119	1.48292	182	9	1	0.0286458	97.5225	114.911	533	1.21945	2.59302	NA
3	166775382	rs112196984	ALC:ATF/SPB/LM:VERS/CD	6.10509	7.85075e-07	84.9015	0.000422439	0.568099	182	9	1	0.0286458	97.5225	114.911	533	1.21945	2.59302	NA
3	169470789	rs3851386	ALC:ATF/SPB/LM:VERS/R	6.68958	2.04372e-07	412.022	0.000165119	1.48292	160	31	1	0.0859375	101.186	83.6645	533	1.22018	1.6788	NA
3	169470789	rs3851386	ALC:ATF/SPB/LM:VERS/CD	6.12051	7.57686e-07	10.7312	0.000346363	0.100206	160	31	1	0.0859375	101.186	83.6645	533	1.22018	1.6788	NA
3	185547443	rs76947887	ALC:ATF/SPB/LM:VERS/R	6.68958	2.04372e-07	412.022	0.000165119	1.48292	174	17	1	0.0494792	97.7614	104.282	533	1.33445	0.839741	NA
3	185547443	rs76947887	ALC:ATF/SPB/LM:VERS/CD	5.8684	1.35395e-06	45.8725	0.000772733	0.36009	174	17	1	0.0494792	97.7614	104.282	533	1.33445	0.839741	NA
3	185652365	rs74809279	ALC:ATF/SPB/LM:VERS/R	6.68958	2.04372e-07	412.022	0.000165119	1.48292	179	12	1	0.0364583	100.441	67.0275	533	1.24776	2.23008	NA
3	185652365	rs74809279	ALC:ATF/SPB/LM:VERS/CD	6.25707	5.53262e-07	29.469	0.000212531	0.242731	179	12	1	0.0364583	100.441	67.0275	533	1.24776	2.23008	NA
3	185813873	rs1374910	ALC:ATF/SPB/LM:VERS/R	6.68958	2.04372e-07	412.022	0.000165119	1.48292	172	19	1	0.0546875	96.3475	116.396	533	1.34141	0.922034	NA
3	185813873	rs1374910	ALC:ATF/SPB/LM:VERS/CD	6.16145	6.89532e-07	55.909	0.000307112	0.433154	172	19	1	0.0546875	96.3475	116.396	533	1.34141	0.922034	NA
3	192573149	rs781411	ALC:ATF/SPB/LM:VERS/R	6.68958	2.04372e-07	412.022	0.000165119	1.48292	167	24	1	0.0677083	99.0724	93.2583	533	1.24262	1.29122	NA
3	192573149	rs781411	ALC:ATF/SPB/LM:VERS/CD	5.88915	1.29077e-06	24.716	0.000767082	0.213491	167	24	1	0.0677083	99.0724	93.2583	533	1.24262	1.29122	NA
3	193572336	rs114807764	ALC:ATF/SPB/LM:VERS/R	6.68958	2.04372e-07	412.022	0.000165119	1.48292	182	9	1	0.0286458	97.2955	119.5	533	1.27078	1.01607	NA
3	193572336	rs114807764	ALC:ATF/SPB/LM:VERS/CD	5.90243	1.25191e-06	73.8716	0.000733819	0.479318	182	9	1	0.0286458	97.2955	119.5	533	1.27078	1.01607	NA
4	3399951	rs73193388	ALC:ATF/SPB/LM:VERS/R	6.68958	2.04372e-07	412.022	0.000165119	1.48292	150	41	1	0.111979	97.9935	99.6163	533	1.22068	1.35692	NA
4	3399951	rs73193388	ALC:ATF/SPB/LM:VERS/CD	5.86868	1.35307e-06	24.858	0.000804719	0.227594	150	41	1	0.111979	97.9935	99.6163	533	1.22068	1.35692	NA
4	24491428	rs34850839	ALC:ATF/SPB/LM:VERS/R	6.68958	2.04372e-07	412.022	0.000165119	1.48292	178	13	1	0.0390625	96.2578	126.877	533	1.28911	1.04276	NA
4	24491428	rs34850839	ALC:ATF/SPB/LM:VERS/CD	6.10527	7.84753e-07	68.1989	0.000426267	0.47111	178	13	1	0.0390625	96.2578	126.877	533	1.28911	1.04276	NA
4	30157352	rs17746251	ALC:ATF/SPB/LM:VERS/R	6.68958	2.04372e-07	412.022	0.000165119	1.48292	160	31	1	0.0859375	95.9962	110.448	533	1.30619	1.08361	NA
4	30157352	rs17746251	ALC:ATF/SPB/LM:VERS/CD	6.12147	7.56021e-07	40.6475	0.000370288	0.346885	160	31	1	0.0859375	95.9962	110.448	533	1.30619	1.08361	NA
4	67260707	rs7688257	ALC:ATF/SPB/LM:VERS/R	6.68958	2.04372e-07	412.022	0.000165119	1.48292	174	17	1	0.0494792	100.34	77.8941	533	1.24315	1.53804	NA
4	67260707	rs7688257	ALC:ATF/SPB/LM:VERS/CD	6.30958	4.90256e-07	17.6217	0.000201653	0.149505	174	17	1	0.0494792	100.34	77.8941	533	1.24315	1.53804	NA
4	156614375	rs6811244	ALC:ATF/SPB/LM:VERS/R	6.68958	2.04372e-07	412.022	0.000165119	1.48292	132	59	1	0.158854	105.28	82.8198	533	1.19991	1.64591	NA
4	156614375	rs6811244	ALC:ATF/SPB/LM:VERS/CD	6.45441	3.51231e-07	-2.51859	0.000112704	-0.0250545	132	59	1	0.158854	105.28	82.8198	533	1.19991	1.64591	NA
4	183390978	rs72705524	ALC:ATF/SPB/LM:VERS/R	6.68958	2.04372e-07	412.022	0.000165119	1.48292	153	38	1	0.104167	100.618	89.1763	533	1.23534	1.34137	NA
4	183390978	rs72705524	ALC:ATF/SPB/LM:VERS/CD	6.0459	8.99711e-07	9.67805	0.000464485	0.090277	153	38	1	0.104167	100.618	89.1763	533	1.23534	1.34137	NA
5	76657474	rs76525389	ALC:ATF/SPB/LM:VERS/R	6.68958	2.04372e-07	412.022	0.000165119	1.48292	181	10	1	0.03125	98.1491	101.83	533	1.23061	1.74152	NA
5	76657474	rs76525389	ALC:ATF/SPB/LM:VERS/CD	5.84724	1.42153e-06	58.2919	0.000851907	0.406842	181	10	1	0.03125	98.1491	101.83	533	1.23061	1.74152	NA
5	84372691	rs76297085	ALC:ATF/SPB/LM:VERS/R	6.68958	2.04372e-07	412.022	0.000165119	1.48292	174	17	1	0.0494792	100.274	78.5706	533	1.24303	1.51876	NA
5	84372691	rs76297085	ALC:ATF/SPB/LM:VERS/CD	5.95569	1.10741e-06	30.4413	0.000601881	0.264938	174	17	1	0.0494792	100.274	78.5706	533	1.24303	1.51876	NA
5	84731825	rs79176375	ALC:ATF/SPB/LM:VERS/R	6.68958	2.04372e-07	412.022	0.000165119	1.48292	176	15	1	0.0442708	99.9994	78.8933	533	1.24288	1.53698	NA
5	84731825	rs79176375	ALC:ATF/SPB/LM:VERS/CD	5.96271	1.08965e-06	33.4532	0.000588454	0.28156	176	15	1	0.0442708	99.9994	78.8933	533	1.24288	1.53698	NA
5	126016247	rs409654	ALC:ATF/SPB/LM:VERS/R	6.68958	2.04372e-07	412.022	0.000165119	1.48292	168	23	1	0.0651042	100.993	78.9739	533	1.23474	1.67611	NA
5	126016247	rs409654	ALC:ATF/SPB/LM:VERS/CD	6.16555	6.83051e-07	14.9116	0.000302071	0.135723	168	23	1	0.0651042	100.993	78.9739	533	1.23474	1.67611	NA
6	42046566	rs9369327	ALC:ATF/SPB/LM:VERS/R	6.68958	2.04372e-07	412.022	0.000165119	1.48292	155	36	1	0.0989583	99.9004	91.6314	533	1.24345	1.27821	NA
6	42046566	rs9369327	ALC:ATF/SPB/LM:VERS/CD	5.92623	1.18515e-06	14.9753	0.000670995	0.138052	155	36	1	0.0989583	99.9004	91.6314	533	1.24345	1.27821	NA
6	138114813	rs10214726	ALC:ATF/SPB/LM:VERS/R	6.68958	2.04372e-07	412.022	0.000165119	1.48292	166	25	1	0.0703125	99.397	91.3356	533	1.25074	1.22963	NA
6	138114813	rs10214726	ALC:ATF/SPB/LM:VERS/CD	5.86448	1.36622e-06	26.3497	0.000816421	0.232954	166	25	1	0.0703125	99.397	91.3356	533	1.25074	1.22963	NA
6	163063059	rs76174028	ALC:ATF/SPB/LM:VERS/R	6.68958	2.04372e-07	412.022	0.000165119	1.48292	174	17	1	0.0494792	99.7258	84.1765	533	1.23658	1.55342	NA
6	163063059	rs76174028	ALC:ATF/SPB/LM:VERS/CD	6.04459	9.02433e-07	25.6021	0.00046418	0.213724	174	17	1	0.0494792	99.7258	84.1765	533	1.23658	1.55342	NA
7	73639160	rs77632765	ALC:ATF/SPB/LM:VERS/R	6.68958	2.04372e-07	412.022	0.000165119	1.48292	156	35	1	0.0963542	95.9405	109.045	533	1.20926	1.43868	NA
7	73639160	rs77632765	ALC:ATF/SPB/LM:VERS/CD	6.00184	9.95763e-07	34.0237	0.000588397	0.294801	156	35	1	0.0963542	95.9405	109.045	533	1.20926	1.43868	NA
8	4293093	rs76533076	ALC:ATF/SPB/LM:VERS/R	6.68958	2.04372e-07	412.022	0.000165119	1.48292	170	21	1	0.0598958	97.5688	104.6	533	1.22176	1.50063	NA
8	4293093	rs76533076	ALC:ATF/SPB/LM:VERS/CD	5.87532	1.33254e-06	40.1298	0.000793319	0.326996	170	21	1	0.0598958	97.5688	104.6	533	1.22176	1.50063	NA
8	13969996	rs2410132	ALC:ATF/SPB/LM:VERS/R	6.68958	2.04372e-07	412.022	0.000165119	1.48292	177	14	1	0.0416667	98.6293	94.7071	533	1.24357	1.30366	NA
8	13969996	rs2410132	ALC:ATF/SPB/LM:VERS/CD	5.96116	1.09354e-06	35.1452	0.000648088	0.267463	177	14	1	0.0416667	98.6293	94.7071	533	1.24357	1.30366	NA
8	13991434	rs4831519	ALC:ATF/SPB/LM:VERS/R	6.68958	2.04372e-07	412.022	0.000165119	1.48292	176	15	1	0.0442708	99.042	90.1267	533	1.24839	1.24534	NA
8	13991434	rs4831519	ALC:ATF/SPB/LM:VERS/CD	6.01849	9.5832e-07	30.2117	0.000556791	0.237705	176	15	1	0.0442708	99.042	90.1267	533	1.24839	1.24534	NA
8	13998638	rs1601435	ALC:ATF/SPB/LM:VERS/R	6.68958	2.04372e-07	412.022	0.000165119	1.48292	174	17	1	0.0494792	98.7149	94.5235	533	1.23918	1.35574	NA
8	13998638	rs1601435	ALC:ATF/SPB/LM:VERS/CD	5.93894	1.15096e-06	30.3225	0.000676149	0.241686	174	17	1	0.0494792	98.7149	94.5235	533	1.23918	1.35574	NA
8	15509700	rs60804030	ALC:ATF/SPB/LM:VERS/R	6.68958	2.04372e-07	412.022	0.000165119	1.48292	153	38	1	0.104167	99.7849	92.5316	533	1.26842	1.16452	NA
8	15509700	rs60804030	ALC:ATF/SPB/LM:VERS/CD	5.85924	1.38279e-06	19.0509	0.000840827	0.177532	153	38	1	0.104167	99.7849	92.5316	533	1.26842	1.16452	NA
8	15720345	rs10103432	ALC:ATF/SPB/LM:VERS/R	6.68958	2.04372e-07	412.022	0.000165119	1.48292	182	9	1	0.0286458	97.9175	106.922	533	1.25122	1.17083	NA
8	15720345	rs10103432	ALC:ATF/SPB/LM:VERS/CD	5.87721	1.32674e-06	71.3896	0.000769972	0.483289	182	9	1	0.0286458	97.9175	106.922	533	1.25122	1.17083	NA
8	15795294	rs79276794	ALC:ATF/SPB/LM:VERS/R	6.68958	2.04372e-07	412.022	0.000165119	1.48292	186	5	1	0.0182292	96.9209	151.2	533	1.24607	1.46992	NA
8	15795294	rs79276794	ALC:ATF/SPB/LM:VERS/CD	6.27623	5.29383e-07	119.433	0.000294823	0.640525	186	5	1	0.0182292	96.9209	151.2	533	1.24607	1.46992	NA
8	15795294	rs79276794	ALC:ATF/SPB/LM:VERS/A	6.13809	7.27627e-07	151.581	9.25337e-06	0.875238	186	5	1	0.0182292	96.9209	151.2	533	1.24607	1.46992	NA
8	15817201	rs10103753	ALC:ATF/SPB/LM:VERS/R	6.68958	2.04372e-07	412.022	0.000165119	1.48292	169	22	1	0.0625	101.03	77.6955	533	1.25477	1.29001	NA
8	15817201	rs10103753	ALC:ATF/SPB/LM:VERS/CD	6.15657	6.97323e-07	16.1968	0.000316857	0.14739	169	22	1	0.0625	101.03	77.6955	533	1.25477	1.29001	NA
8	15821966	rs7003942	ALC:ATF/SPB/LM:VERS/R	6.68958	2.04372e-07	412.022	0.000165119	1.48292	169	22	1	0.0625	101.03	77.6955	533	1.25477	1.29001	NA
8	15821966	rs7003942	ALC:ATF/SPB/LM:VERS/CD	6.15657	6.97323e-07	16.1968	0.000316857	0.14739	169	22	1	0.0625	101.03	77.6955	533	1.25477	1.29001	NA
8	17733695	rs17506369	ALC:ATF/SPB/LM:VERS/R	6.68958	2.04372e-07	412.022	0.000165119	1.48292	181	10	1	0.03125	97.1867	119.25	533	1.26158	1.11433	NA
8	17733695	rs17506369	ALC:ATF/SPB/LM:VERS/CD	5.89365	1.27746e-06	68.6092	0.00075895	0.455003	181	10	1	0.03125	97.1867	119.25	533	1.26158	1.11433	NA
8	17808598	rs4406440	ALC:ATF/SPB/LM:VERS/R	6.68958	2.04372e-07	412.022	0.000165119	1.48292	171	20	1	0.0572917	100.796	77.36	533	1.23426	1.87605	NA
8	17808598	rs4406440	ALC:ATF/SPB/LM:VERS/CD	6.12342	7.52625e-07	19.302	0.000337713	0.172891	171	20	1	0.0572917	100.796	77.36	533	1.23426	1.87605	NA
8	18850368	rs17127314	ALC:ATF/SPB/LM:VERS/R	6.68958	2.04372e-07	412.022	0.000165119	1.48292	152	39	1	0.106771	98.7982	96.5633	533	1.23748	1.28903	NA
8	18850368	rs17127314	ALC:ATF/SPB/LM:VERS/CD	5.8585	1.38517e-06	18.242	0.00082501	0.166642	152	39	1	0.106771	98.7982	96.5633	533	1.23748	1.28903	NA
8	18863149	rs62495865	ALC:ATF/SPB/LM:VERS/R	6.68958	2.04372e-07	412.022	0.000165119	1.48292	154	37	1	0.101562	101.989	83.1614	533	1.21128	1.75726	NA
8	18863149	rs62495865	ALC:ATF/SPB/LM:VERS/CD	6.29048	5.12296e-07	4.19878	0.000202304	0.0399718	154	37	1	0.101562	101.989	83.1614	533	1.21128	1.75726	NA
8	23236904	rs4872092	ALC:ATF/SPB/LM:VERS/R	6.68958	2.04372e-07	412.022	0.000165119	1.48292	168	23	1	0.0651042	100.649	81.4926	533	1.25452	1.24971	NA
8	23236904	rs4872092	ALC:ATF/SPB/LM:VERS/CD	6.02963	9.34053e-07	19.337	0.000488687	0.175088	168	23	1	0.0651042	100.649	81.4926	533	1.25452	1.24971	NA
8	26726072	rs7819786	ALC:ATF/SPB/LM:VERS/R	6.68958	2.04372e-07	412.022	0.000165119	1.48292	171	20	1	0.0572917	96.5204	113.915	533	1.23306	1.3834	NA
8	26726072	rs7819786	ALC:ATF/SPB/LM:VERS/CD	6.06679	8.57446e-07	51.1748	0.000491487	0.40231	171	20	1	0.0572917	96.5204	113.915	533	1.23306	1.3834	NA
8	27263058	rs1867887	ALC:ATF/SPB/LM:VERS/R	6.68958	2.04372e-07	412.022	0.000165119	1.48292	159	32	1	0.0885417	97.1697	104.166	533	1.28971	1.10055	NA
8	27263058	rs1867887	ALC:ATF/SPB/LM:VERS/CD	5.91657	1.21179e-06	32.5484	0.000692938	0.284262	159	32	1	0.0885417	97.1697	104.166	533	1.28971	1.10055	NA
8	40874481	rs7823157	ALC:ATF/SPB/LM:VERS/R	6.68958	2.04372e-07	412.022	0.000165119	1.48292	149	42	1	0.114583	96.0872	106.34	533	1.3353	1.06852	NA
8	40874481	rs7823157	ALC:ATF/SPB/LM:VERS/CD	5.93218	1.16903e-06	27.7694	0.000646435	0.247851	149	42	1	0.114583	96.0872	106.34	533	1.3353	1.06852	NA
8	76894607	rs76079222	ALC:ATF/SPB/LM:VERS/R	6.68958	2.04372e-07	412.022	0.000165119	1.48292	160	31	1	0.0859375	98.1131	99.5226	533	1.22493	1.3811	NA
8	76894607	rs76079222	ALC:ATF/SPB/LM:VERS/CD	5.84658	1.42371e-06	24.3999	0.000855724	0.213881	160	31	1	0.0859375	98.1131	99.5226	533	1.22493	1.3811	NA
8	101862553	rs35015010	ALC:ATF/SPB/LM:VERS/R	6.68958	2.04372e-07	412.022	0.000165119	1.48292	170	21	1	0.0598958	99.5335	88.6952	533	1.21629	1.93658	NA
8	101862553	rs35015010	ALC:ATF/SPB/LM:VERS/CD	5.93518	1.16096e-06	25.094	0.000632745	0.215841	170	21	1	0.0598958	99.5335	88.6952	533	1.21629	1.93658	NA
8	102185746	rs7818274	ALC:ATF/SPB/LM:VERS/R	6.68958	2.04372e-07	412.022	0.000165119	1.48292	175	16	1	0.046875	99.1188	89.8438	533	1.24877	1.2426	NA
8	102185746	rs7818274	ALC:ATF/SPB/LM:VERS/CD	5.91001	1.23023e-06	33.9084	0.000709594	0.274895	175	16	1	0.046875	99.1188	89.8438	533	1.24877	1.2426	NA
8	102187808	rs1265138	ALC:ATF/SPB/LM:VERS/R	6.68958	2.04372e-07	412.022	0.000165119	1.48292	176	15	1	0.0442708	99.0704	89.7933	533	1.2517	1.1998	NA
8	102187808	rs1265138	ALC:ATF/SPB/LM:VERS/CD	5.92479	1.18908e-06	34.8799	0.000682779	0.278163	176	15	1	0.0442708	99.0704	89.7933	533	1.2517	1.1998	NA
8	132421240	rs11783475	ALC:ATF/SPB/LM:VERS/R	6.68958	2.04372e-07	412.022	0.000165119	1.48292	151	40	1	0.109375	95.2913	109.858	533	1.33224	1.08237	NA
8	132421240	rs11783475	ALC:ATF/SPB/LM:VERS/CD	5.96625	1.08081e-06	29.989	0.000590237	0.262208	151	40	1	0.109375	95.2913	109.858	533	1.33224	1.08237	NA
8	133855227	rs80091905	ALC:ATF/SPB/LM:VERS/R	6.68958	2.04372e-07	412.022	0.000165119	1.48292	177	14	1	0.0416667	97.2853	111.7	533	1.25545	1.18061	NA
8	133855227	rs80091905	ALC:ATF/SPB/LM:VERS/CD	5.86496	1.36471e-06	52.1456	0.0008189	0.38012	177	14	1	0.0416667	97.2853	111.7	533	1.25545	1.18061	NA
9	31530619	rs13289770	ALC:ATF/SPB/LM:VERS/R	6.68958	2.04372e-07	412.022	0.000165119	1.48292	178	13	1	0.0390625	97.7735	106.123	533	1.22187	1.80035	NA
9	31530619	rs13289770	ALC:ATF/SPB/LM:VERS/CD	5.87851	1.32278e-06	56.3632	0.000801455	0.41644	178	13	1	0.0390625	97.7735	106.123	533	1.22187	1.80035	NA
9	76946688	rs72736937	ALC:ATF/SPB/LM:VERS/R	6.68958	2.04372e-07	412.022	0.000165119	1.48292	184	7	1	0.0234375	97.2755	126.371	533	1.23946	1.49257	NA
9	76946688	rs72736937	ALC:ATF/SPB/LM:VERS/CD	6.32946	4.6832e-07	104.521	0.00019519	0.640949	184	7	1	0.0234375	97.2755	126.371	533	1.23946	1.49257	NA
9	76946688	rs72736937	ALC:ATF/SPB/LM:VERS/A	5.46023	3.46551e-06	125.649	5.1485e-06	0.864816	184	7	1	0.0234375	97.2755	126.371	533	1.23946	1.49257	NA
9	81000494	rs884065	ALC:ATF/SPB/LM:VERS/R	6.68958	2.04372e-07	412.022	0.000165119	1.48292	151	40	1	0.109375	98.9362	96.0982	533	1.21836	1.3896	NA
9	81000494	rs884065	ALC:ATF/SPB/LM:VERS/CD	5.8503	1.41155e-06	23.3894	0.000847695	0.216888	151	40	1	0.109375	98.9362	96.0982	533	1.21836	1.3896	NA
10	30565095	rs75592601	ALC:ATF/SPB/LM:VERS/R	6.68958	2.04372e-07	412.022	0.000165119	1.48292	172	19	1	0.0546875	97.4575	106.347	533	1.25858	1.16803	NA
10	30565095	rs75592601	ALC:ATF/SPB/LM:VERS/CD	5.89193	1.28253e-06	44.4774	0.000756398	0.35412	172	19	1	0.0546875	97.4575	106.347	533	1.25858	1.16803	NA
10	66688645	rs6480203	ALC:ATF/SPB/LM:VERS/R	6.68958	2.04372e-07	412.022	0.000165119	1.48292	146	45	1	0.122396	99.1121	95.8429	533	1.29949	1.10327	NA
10	66688645	rs6480203	ALC:ATF/SPB/LM:VERS/CD	5.84626	1.42477e-06	18.6509	0.000861065	0.174432	146	45	1	0.122396	99.1121	95.8429	533	1.29949	1.10327	NA
10	94312437	rs79509194	ALC:ATF/SPB/LM:VERS/R	6.68958	2.04372e-07	412.022	0.000165119	1.48292	186	5	1	0.0182292	98.7435	83.4	533	1.24249	2.09829	NA
10	94312437	rs79509194	ALC:ATF/SPB/LM:VERS/CD	5.92733	1.18215e-06	80.3915	0.000659572	0.487244	186	5	1	0.0182292	98.7435	83.4	533	1.24249	2.09829	NA
10	112451666	rs7090959	ALC:ATF/SPB/LM:VERS/R	6.68958	2.04372e-07	412.022	0.000165119	1.48292	155	36	1	0.0989583	99.0285	95.3853	533	1.29673	1.07149	NA
10	112451666	rs7090959	ALC:ATF/SPB/LM:VERS/CD	5.84905	1.41562e-06	25.034	0.000841911	0.230283	155	36	1	0.0989583	99.0285	95.3853	533	1.29673	1.07149	NA
10	132258825	rs57777404	ALC:ATF/SPB/LM:VERS/R	6.68958	2.04372e-07	412.022	0.000165119	1.48292	167	24	1	0.0677083	98.4629	97.4996	533	1.2033	1.84284	NA
10	132258825	rs57777404	ALC:ATF/SPB/LM:VERS/CD	5.85472	1.39728e-06	34.6022	0.000849291	0.29798	167	24	1	0.0677083	98.4629	97.4996	533	1.2033	1.84284	NA
11	3901583	rs75197750	ALC:ATF/SPB/LM:VERS/R	6.68958	2.04372e-07	412.022	0.000165119	1.48292	175	16	1	0.046875	99.2611	88.2875	533	1.22634	1.84932	NA
11	3901583	rs75197750	ALC:ATF/SPB/LM:VERS/CD	5.89656	1.26894e-06	35.0314	0.000730646	0.287007	175	16	1	0.046875	99.2611	88.2875	533	1.22634	1.84932	NA
11	8128336	rs4424661	ALC:ATF/SPB/LM:VERS/R	6.68958	2.04372e-07	412.022	0.000165119	1.48292	179	12	1	0.0364583	98.2888	99.1325	533	1.24529	1.27013	NA
11	8128336	rs4424661	ALC:ATF/SPB/LM:VERS/CD	5.84932	1.41476e-06	55.1956	0.000843834	0.409958	179	12	1	0.0364583	98.2888	99.1325	533	1.24529	1.27013	NA
11	22162153	rs74471654	ALC:ATF/SPB/LM:VERS/R	6.68958	2.04372e-07	412.022	0.000165119	1.48292	166	25	1	0.0703125	98.8909	94.696	533	1.21853	1.55696	NA
11	22162153	rs74471654	ALC:ATF/SPB/LM:VERS/CD	5.84612	1.42522e-06	29.6842	0.000855005	0.259279	166	25	1	0.0703125	98.8909	94.696	533	1.21853	1.55696	NA
11	28910910	rs75462447	ALC:ATF/SPB/LM:VERS/R	6.68958	2.04372e-07	412.022	0.000165119	1.48292	183	8	1	0.0260417	98.2524	100.388	533	1.25453	1.08858	NA
11	28910910	rs75462447	ALC:ATF/SPB/LM:VERS/CD	5.85226	1.40521e-06	66.369	0.000843424	0.439441	183	8	1	0.0260417	98.2524	100.388	533	1.25453	1.08858	NA
11	59494923	rs61901623	ALC:ATF/SPB/LM:VERS/R	6.68958	2.04372e-07	412.022	0.000165119	1.48292	167	24	1	0.0677083	95.752	116.362	533	1.29417	1.09806	NA
11	59494923	rs61901623	ALC:ATF/SPB/LM:VERS/CD	6.19261	6.41782e-07	49.2449	0.000318614	0.395853	167	24	1	0.0677083	95.752	116.362	533	1.29417	1.09806	NA
11	70604142	rs76092565	ALC:ATF/SPB/LM:VERS/R	6.68958	2.04372e-07	412.022	0.000165119	1.48292	164	27	1	0.0755208	96.4341	109.93	533	1.24535	1.2717	NA
11	70604142	rs76092565	ALC:ATF/SPB/LM:VERS/CD	6.02974	9.33802e-07	41.2324	0.000524524	0.344795	164	27	1	0.0755208	96.4341	109.93	533	1.24535	1.2717	NA
11	82099520	rs76603440	ALC:ATF/SPB/LM:VERS/R	6.68958	2.04372e-07	412.022	0.000165119	1.48292	185	6	1	0.0208333	97.2918	130.717	533	1.26998	0.976945	NA
11	82099520	rs76603440	ALC:ATF/SPB/LM:VERS/CD	6.06786	8.55346e-07	102.424	0.000468058	0.594894	185	6	1	0.0208333	97.2918	130.717	533	1.26998	0.976945	NA
11	109112934	rs77214830	ALC:ATF/SPB/LM:VERS/R	6.68958	2.04372e-07	412.022	0.000165119	1.48292	181	10	1	0.03125	96.1552	137.92	533	1.24098	1.47474	NA
11	109112934	rs77214830	ALC:ATF/SPB/LM:VERS/CD	6.42408	3.76632e-07	88.8202	0.000213362	0.569363	181	10	1	0.03125	96.1552	137.92	533	1.24098	1.47474	NA
11	134498869	rs117994471	ALC:ATF/SPB/LM:VERS/R	6.68958	2.04372e-07	412.022	0.000165119	1.48292	181	10	1	0.03125	99.4276	78.69	533	1.2494	1.32228	NA
11	134498869	rs117994471	ALC:ATF/SPB/LM:VERS/CD	5.95784	1.10196e-06	47.4083	0.000616836	0.357794	181	10	1	0.03125	99.4276	78.69	533	1.2494	1.32228	NA
11	134548034	rs80312081	ALC:ATF/SPB/LM:VERS/R	6.68958	2.04372e-07	412.022	0.000165119	1.48292	177	14	1	0.0416667	97.8723	104.279	533	1.24481	1.27198	NA
[truncated: 1,756 more rows]

## Sheet: Table S2C
Table S2C. Genome wide association study results for family history (p-values < 5×10-6 and replicated associations)
Chr	Position (hg38)	SNP	Test name	-Log p-value (screening)	P-value	Effect size	Cases_AA	Cases_Aa	Cases_aa	FH_AA	FH_Aa	FH_aa
10	78650353	rs1655627	ALC:FHA/SPB:F/GLM:ATF*VERS/D	6.49624	3.18977e-07	143.1	12	14	0	2	9	0
10	78650353	rs1655627	ALC:FHA/SPB:F/GLM:ATF*VERS/CD	5.67433	2.11674e-06	150.315	12	12	2	2	8	1
5	124084915	rs17491753	ALC:FHA/SPB:F/GLM:ATF*VERS/D	6.49624	3.18977e-07	-144.295	16	10	0	11	0	0
5	124084915	rs17491753	ALC:FHA/SPB:F/GLM:VAS/D	5.70942	1.95245e-06	-25.3181	16	10	0	11	0	0
5	124084915	rs17491753	ALC:FHA/SPB:F/GLM:ATF*VERS/CD	5.67433	2.11674e-06	-142.758	16	8	2	11	0	0
1	244893472	rs74155504	ALC:FHA/SPB:F/GLM:ATF*VERS/D	6.49624	3.18977e-07	-144.075	17	9	0	11	0	0
1	244893472	rs74155504	ALC:FHA/SPB:F/GLM:ATF*VERS/CD	5.67433	2.11674e-06	-143.414	17	8	1	11	0	0
15	97412834	rs12441901	ALC:FHA/SPB:F/GLM:ATF*VERS/D	6.49624	3.18977e-07	-220.52	14	12	0	9	2	0
15	97412834	rs12441901	ALC:FHA/SPB:F/GLM:ATF*VERS/CD	5.67433	2.11674e-06	-218.598	14	10	2	9	2	0
16	6829216	rs12934725	ALC:FHA/SPB:F/GLM:ATF*VERS/D	6.49624	3.18977e-07	220.092	11	15	0	1	10	0
16	6829216	rs12934725	ALC:FHA/SPB:F/GLM:ATF*VERS/CD	5.67433	2.11674e-06	6.55846	11	13	2	1	9	1
3	195588457	rs73212258	ALC:FHA/SPB:F/GLM:ATF*VERS/D	6.49624	3.18977e-07	220.169	10	16	0	1	10	0
3	195588457	rs73212258	ALC:FHA/SPB:F/GLM:ATF*VERS/CD	5.67433	2.11674e-06	26.9332	10	13	3	1	8	2
6	77785047	rs17777705	ALC:FHA/SPB:F/GLM:ATF*VERS/D	6.49624	3.18977e-07	-218.49	14	12	0	9	2	0
6	77785047	rs17777705	ALC:FHA/SPB:F/GLM:ATF*VERS/CD	5.67433	2.11674e-06	-7.13713	14	10	2	9	1	1
17	14962534	rs2215273	ALC:FHA/SPB:F/GLM:ATF*VERS/CD	6.49624	3.18977e-07	-338.884	16	10	0	10	1	0
17	14962534	rs2215273	ALC:FHA/SPB:F/GLM:ATF*VERS/D	6.49624	3.18977e-07	-338.884	16	10	0	10	1	0
4	7512256	rs13128906	ALC:FHA/SPB:F/GLM:ATF*VERS/D	6.49624	3.18977e-07	-336.53	10	16	0	7	4	0
4	7512256	rs13128906	ALC:FHA/SPB:F/GLM:ATF*VERS/CD	5.67433	2.11674e-06	-4.26098	10	14	2	7	3	1
4	90947225	rs7678624	ALC:FHA/SPB:F/GLM:ATF*VERS/D	6.49624	3.18977e-07	-336.179	9	17	0	8	3	0
4	90947225	rs7678624	ALC:FHA/SPB:F/GLM:ATF*VERS/CD	5.67433	2.11674e-06	-331.108	9	15	2	8	3	0
5	124102861	rs6897236	ALC:FHA/SPB:F/GLM:ATF*VERS/D	6.49624	3.18977e-07	-336.722	14	12	0	10	1	0
5	124102861	rs6897236	ALC:FHA/SPB:F/GLM:ATF*VERS/CD	5.67433	2.11674e-06	-333.792	14	10	2	10	1	0
22	23580796	rs140174	ALC:FHA/SPB:F/GLM:ATF*VERS/CD	6.49624	3.18977e-07	336.356	13	13	0	2	9	0
22	23580796	rs140174	ALC:FHA/SPB:F/GLM:ATF*VERS/D	6.49624	3.18977e-07	336.356	13	13	0	2	9	0
10	62310460	rs3864807	ALC:FHA/SPB:F/GLM:ATF*VERS/D	6.49624	3.18977e-07	337.134	17	9	0	4	7	0
10	62310460	rs3864807	ALC:FHA/SPB:F/GLM:ATF*VERS/CD	5.67433	2.11674e-06	334.315	17	7	2	4	5	2
18	61012708	rs12327434	ALC:FHA/SPB:F/GLM:ATF*VERS/D	6.49624	3.18977e-07	-335.454	8	18	0	7	4	0
18	61012708	rs12327434	ALC:FHA/SPB:F/GLM:ATF*VERS/CD	5.67433	2.11674e-06	-3.26735	8	12	6	7	2	2
1	14707012	rs4661514	ALC:FHA/SPB:F/GLM:ATF*VERS/D	6.49624	3.18977e-07	336.679	9	17	0	1	10	0
1	14707012	rs4661514	ALC:FHA/SPB:F/GLM:ATF*VERS/CD	5.67433	2.11674e-06	171.052	9	12	5	1	7	3
1	114125677	rs7546417	ALC:FHA/SPB:F/GLM:ATF*VERS/D	6.49624	3.18977e-07	-334.549	10	16	0	9	2	0
1	114125677	rs7546417	ALC:FHA/SPB:F/GLM:ATF*VERS/CD	5.67433	2.11674e-06	-331.309	10	13	3	9	2	0
5	114214345	rs6893764	ALC:FHA/SPB:F/GLM:ATF*VERS/CD	6.49624	3.18977e-07	334.826	16	10	0	3	8	0
5	114214345	rs6893764	ALC:FHA/SPB:F/GLM:ATF*VERS/D	6.49624	3.18977e-07	334.826	16	10	0	3	8	0
7	97373792	rs2058667	ALC:FHA/SPB:F/GLM:ATF*VERS/D	6.49624	3.18977e-07	1109.88	14	12	0	3	8	0
7	97373792	rs2058667	ALC:FHA/SPB:F/GLM:ATF*VERS/CD	5.67433	2.11674e-06	5.9174	14	9	3	3	7	1
17	32821541	rs7224466	ALC:FHA/SPB:F/GLM:ATF*VERS/D	6.49624	3.18977e-07	-1109.99	10	16	0	7	4	0
17	32821541	rs7224466	ALC:FHA/SPB:F/GLM:ATF*VERS/CD	5.67433	2.11674e-06	-3.96482	10	14	2	7	3	1
8	17311181	rs2073688	ALC:FHA/SPB:F/GLM:ATF*VERS/D	6.49624	3.18977e-07	1099.13	15	11	0	4	7	0
8	17311181	rs2073688	ALC:FHA/SPB:F/GLM:ATF*VERS/CD	5.67433	2.11674e-06	5.98493	15	9	2	4	6	1
21	25495706	rs2829779	ALC:FHA/SPB:F/GLM:ATF*VERS/D	6.49624	3.18977e-07	1097.31	15	11	0	4	7	0
21	25495706	rs2829779	ALC:FHA/SPB:F/GLM:ATF*VERS/CD	5.67433	2.11674e-06	1093	15	9	2	4	5	2
6	34562388	rs4713813	ALC:FHA/SPB:F/GLM:ATF*VERS/D	6.49624	3.18977e-07	-1095.58	9	17	0	8	3	0
6	34562388	rs4713813	ALC:FHA/SPB:F/GLM:ATF*VERS/CD	5.67433	2.11674e-06	-1090.31	9	15	2	8	3	0
2	239345610	rs62182135	ALC:FHA/SPB:F/GLM:ATF*VERS/D	6.49624	3.18977e-07	1092.91	18	8	0	4	7	0
2	239345610	rs62182135	ALC:FHA/SPB:F/GLM:ATF*VERS/CD	5.67433	2.11674e-06	1084.74	18	6	2	4	5	2
10	85445856	rs1912321	ALC:FHA/SPB:F/GLM:ATF*VERS/D	6.49624	3.18977e-07	-1093.43	10	16	0	8	3	0
10	85445856	rs1912321	ALC:FHA/SPB:F/GLM:ATF*VERS/CD	5.67433	2.11674e-06	-1089.25	10	13	3	8	3	0
15	97805579	rs4307929	ALC:FHA/SPB:F/GLM:ATF*VERS/D	6.49624	3.18977e-07	-1091.72	9	17	0	8	3	0
15	97805579	rs4307929	ALC:FHA/SPB:F/GLM:ATF*VERS/CD	5.67433	2.11674e-06	-1078.6	9	12	5	8	3	0
1	241005541	rs658214	ALC:FHA/SPB:M/CAT/CD	6.05088	4.02284e-07	1.28189	73	79	14	30	61	3
1	241005541	rs658214	ALC:FHA/SPB:M/GLM:TAI/CD	6.35759	4.3894e-07	0.391579	73	79	14	30	61	3
1	241005541	rs658214	ALC:FHA/SPB:M/GLM:ATF*VERS/CD	6.29588	5.05968e-07	0.430875	73	79	14	30	61	3
1	241005541	rs658214	ALC:FHA/SPB:M/GLM/CD	6.29457	5.0749e-07	0.403045	73	79	14	30	61	3
1	241005541	rs658214	ALC:FHA/SPB:M/GLM:SAI/CD	6.26489	5.43389e-07	0.397223	73	79	14	30	61	3
1	241005541	rs658214	ALC:FHA/SPB:M/GLM:PACS/CD	6.23124	5.87159e-07	0.396574	73	79	14	30	61	3
1	241005541	rs658214	ALC:FHA/SPB:M/GLM:VAS/CD	6.23095	5.87553e-07	0.396415	73	79	14	30	61	3
1	241005541	rs658214	ALC:FHA/SPB:M/GLM:OCSD/CD	5.94656	1.13094e-06	0.345727	73	79	14	30	61	3
13	96149253	rs2262077	ALC:FHA/SPB:F/GLM:OCSD/D	6.35368	4.42919e-07	25.0699	17	9	0	2	9	0
13	96149253	rs2262077	ALC:FHA/SPB:F/GLM:TAI/D	5.90305	1.25013e-06	21.7646	17	9	0	2	9	0
13	96149253	rs2262077	ALC:FHA/SPB:F/GLM/D	5.81548	1.52941e-06	21.581	17	9	0	2	9	0
13	96149253	rs2262077	ALC:FHA/SPB:F/GLM:SAI/D	5.69658	2.01102e-06	21.8174	17	9	0	2	9	0
13	96149253	rs2262077	ALC:FHA/SPB:F/GLM:VAS/D	5.69354	2.02516e-06	21.5561	17	9	0	2	9	0
13	96149253	rs2262077	ALC:FHA/SPB:F/GLM:OCSD/A	5.53746	2.90093e-06	19.7012	42	10	0	12	10	0
13	96149253	rs2262077	ALC:FHA/SPB:F/GLM:OCSD/CD	5.53675	2.90572e-06	24.2934	17	8	1	2	8	1
13	96149253	rs2262077	ALC:FHA/SPB:F/GLM:PACS/D	5.48812	3.24994e-06	22.9138	17	9	0	2	9	0
13	96149253	rs2262077	ALC:FHA/SPB:F/GLM:TAI/A	5.35926	4.37261e-06	19.556	42	10	0	12	10	0
5	172170121	rs78696329	ALC:FHA/SPB:F/GLM:VAS/CD	6.23684	5.7964e-07	-38.8218	15	11	0	11	0	0
5	172170121	rs78696329	ALC:FHA/SPB:F/GLM:VAS/D	6.23684	5.7964e-07	-38.8218	15	11	0	11	0	0
5	172176524	rs17700365	ALC:FHA/SPB:F/GLM:VAS/D	6.23684	5.7964e-07	-38.8218	15	11	0	11	0	0
5	172176524	rs17700365	ALC:FHA/SPB:F/GLM:VAS/CD	5.42408	3.76636e-06	-38.502	15	10	1	11	0	0
20	10652665	rs6040055	ALC:FHA/SPB/GLM:OCSD/A	6.1261	7.48004e-07	-1.10426	255	129	0	162	48	0
20	10652665	rs6040055	ALC:FHA/SPB/GLM:TAI/A	6.05234	8.86458e-07	-1.08166	255	129	0	162	48	0
20	10652665	rs6040055	ALC:FHA/SPB/GLM:PACS/A	6.03721	9.17895e-07	-1.07949	255	129	0	162	48	0
20	10652665	rs6040055	ALC:FHA/SPB/GLM:VAS/A	6.03114	9.30806e-07	-1.07853	255	129	0	162	48	0
20	10652665	rs6040055	ALC:FHA/SPB/GLM/A	6.03016	9.32907e-07	-1.07824	255	129	0	162	48	0
20	10652665	rs6040055	ALC:FHA/SPB/GLM:SAI/A	6.02912	9.35148e-07	-1.07816	255	129	0	162	48	0
20	10652665	rs6040055	ALC:FHA/SPB/GLM:ATF*VERS/A	5.97971	1.04782e-06	-1.07677	255	129	0	162	48	0
20	10652665	rs6040055	ALC:FHA/SPB/CAT/A	5.76734	1.5064e-06	0.341198	255	129	0	162	48	0
20	10652665	rs6040055	ALC:FHA/SPB:M/GLM:OCSD/A	5.74125	1.81447e-06	-1.16624	220	112	0	144	44	0
20	10652665	rs6040055	ALC:FHA/SPB/GLM:OCSD/D	5.73873	1.82503e-06	-1.47434	84	108	0	62	43	0
20	10652665	rs6040055	ALC:FHA/SPB/GLM:VAS/D	5.72569	1.88068e-06	-1.45286	84	108	0	62	43	0
20	10652665	rs6040055	ALC:FHA/SPB/GLM:PACS/D	5.72117	1.90035e-06	-1.45104	84	108	0	62	43	0
20	10652665	rs6040055	ALC:FHA/SPB/GLM/D	5.7148	1.92843e-06	-1.44928	84	108	0	62	43	0
20	10652665	rs6040055	ALC:FHA/SPB/GLM:SAI/D	5.71326	1.93527e-06	-1.4494	84	108	0	62	43	0
20	10652665	rs6040055	ALC:FHA/SPB/GLM:TAI/D	5.69256	2.02976e-06	-1.44717	84	108	0	62	43	0
20	10652665	rs6040055	ALC:FHA/SPB/GLM:ATF*VERS/D	5.64129	2.28408e-06	-1.44758	84	108	0	62	43	0
20	10652665	rs6040055	ALC:FHA/SPB/GLM:OCSD/CD	5.63779	2.30254e-06	-1.20431	84	87	21	62	38	5
20	10652665	rs6040055	ALC:FHA/SPB/GLM:PACS/CD	5.57158	2.68176e-06	-1.18075	84	87	21	62	38	5
20	10652665	rs6040055	ALC:FHA/SPB/GLM:TAI/CD	5.57141	2.68278e-06	-1.18115	84	87	21	62	38	5
20	10652665	rs6040055	ALC:FHA/SPB/GLM:VAS/CD	5.56542	2.72007e-06	-1.17934	84	87	21	62	38	5
20	10652665	rs6040055	ALC:FHA/SPB/GLM/CD	5.56028	2.75244e-06	-1.17829	84	87	21	62	38	5
20	10652665	rs6040055	ALC:FHA/SPB/GLM:SAI/CD	5.55894	2.76094e-06	-1.17817	84	87	21	62	38	5
20	10652665	rs6040055	ALC:FHA/SPB/GLM:ATF*VERS/CD	5.49454	3.20226e-06	-1.17411	84	87	21	62	38	5
20	10652665	rs6040055	ALC:FHA/SPB/CAT/CD	5.37009	3.21808e-06	0.474974	84	87	21	62	38	5
20	10652665	rs6040055	ALC:FHA/SPB:M/GLM:VAS/A	5.32137	4.7712e-06	-1.08235	220	112	0	144	44	0
20	10652665	rs6040055	ALC:FHA/SPB:M/GLM:TAI/A	5.31328	4.86093e-06	-1.08327	220	112	0	144	44	0
12	53324662	rs17751196	ALC:FHA/SPB:F/GLM:ATF*VERS/A	6.11943	7.59582e-07	6.60875	35	17	0	10	12	0
12	53324662	rs17751196	ALC:FHA/SPB:F/GLM:ATF*VERS/CD	5.67433	2.11674e-06	1356112426092870	14	7	5	3	4	4
11	93536306	rs11601368	ALC:FHA/SPB:F/GLM:ATF*VERS/CD	6.03568	9.21122e-07	144.428	13	12	0	2	8	0
11	93536306	rs11601368	ALC:FHA/SPB:F/GLM:ATF*VERS/D	6.03568	9.21122e-07	144.428	13	12	0	2	8	0
11	92467911	rs689349	ALC:FHA/SPB:F/GLM:ATF*VERS/CD	6.03568	9.21122e-07	-1105.92	9	16	0	6	4	0
11	92467911	rs689349	ALC:FHA/SPB:F/GLM:ATF*VERS/D	6.03568	9.21122e-07	-1105.92	9	16	0	6	4	0
18	51365021	rs6508066	ALC:FHA/SPB:F/GLM:ATF*VERS/D	6.03568	9.21122e-07	1105.08	15	10	0	3	7	0
10	128880626	rs10829512	ALC:FHA/SPB:M/GLM:OCSD/A	6.01409	9.68085e-07	2.36831	299	33	0	158	30	0
10	128880626	rs10829512	ALC:FHA/SPB/GLM:OCSD/A	5.90662	1.23987e-06	2.13325	348	36	0	178	32	0
10	128880626	rs10829512	ALC:FHA/SPB/GLM:ATF*VERS/A	5.77639	1.67343e-06	2.14658	348	36	0	178	32	0
10	128880626	rs10829512	ALC:FHA/SPB:M/GLM:ATF*VERS/A	5.56942	2.69513e-06	2.31565	299	33	0	158	30	0
10	128880626	rs10829512	ALC:FHA/SPB/GLM:SAI/A	5.50145	3.15174e-06	2.04165	348	36	0	178	32	0
10	128880626	rs10829512	ALC:FHA/SPB/GLM:TAI/A	5.49943	3.16645e-06	2.03968	348	36	0	178	32	0
10	128880626	rs10829512	ALC:FHA/SPB/GLM:PACS/A	5.48231	3.29377e-06	2.0377	348	36	0	178	32	0
10	128880626	rs10829512	ALC:FHA/SPB/GLM:VAS/A	5.47323	3.36333e-06	2.03362	348	36	0	178	32	0
10	128880626	rs10829512	ALC:FHA/SPB/GLM/A	5.47264	3.3679e-06	2.03346	348	36	0	178	32	0
10	128880626	rs10829512	ALC:FHA/SPB:M/GLM:PACS/A	5.44487	3.59026e-06	2.22524	299	33	0	158	30	0
10	128880626	rs10829512	ALC:FHA/SPB:M/GLM:OCSD/D	5.43523	3.67091e-06	2.38758	136	30	0	67	27	0
10	128880626	rs10829512	ALC:FHA/SPB/GLM:OCSD/D	5.37334	4.23309e-06	2.14844	159	33	0	76	29	0
10	128880626	rs10829512	ALC:FHA/SPB:M/GLM:SAI/A	5.33991	4.57181e-06	2.20255	299	33	0	158	30	0
10	128880626	rs10829512	ALC:FHA/SPB:M/GLM:TAI/A	5.33188	4.6572e-06	2.20224	299	33	0	158	30	0
21	31995875	rs2070371	ALC:FHA/SPB/GLM:TAI/D	5.94267	1.14111e-06	1.55617	120	72	0	50	55	0
21	31995875	rs2070371	ALC:FHA/SPB/GLM:SAI/D	5.90351	1.24879e-06	1.55844	120	72	0	50	55	0
21	31995875	rs2070371	ALC:FHA/SPB/GLM:VAS/D	5.78425	1.64342e-06	1.52513	120	72	0	50	55	0
21	31995875	rs2070371	ALC:FHA/SPB/GLM:PACS/D	5.73916	1.82322e-06	1.51086	120	72	0	50	55	0
21	31995875	rs2070371	ALC:FHA/SPB/GLM/D	5.73809	1.82771e-06	1.51059	120	72	0	50	55	0
21	31995875	rs2070371	ALC:FHA/SPB/GLM:ATF*VERS/D	5.72502	1.88355e-06	1.52004	120	72	0	50	55	0
8	16721890	rs1719428	ALC:FHA/SPB:F/GLM:VAS/D	5.94066	1.14642e-06	-25.3162	17	9	0	11	0	0
8	16721890	rs1719428	ALC:FHA/SPB:F/GLM:ATF*VERS/D	5.38784	4.09413e-06	-131.439	17	9	0	11	0	0
6	153689889	rs2000371	ALC:FHA/SPB:F/GLM:SAI/D	5.92437	1.19022e-06	-30.8192	6	20	0	6	5	0
11	110852824	rs10789798	ALC:FHA/SPB:F/GLM:VAS/A	5.85032	1.41149e-06	3.95519	32	20	0	7	15	0
11	110852824	rs10789798	ALC:FHA/SPB:F/GLM:PACS/A	5.35026	4.46416e-06	3.55444	32	20	0	7	15	0
6	31179069	rs4713438	ALC:FHA/SPB:F/GLM:ATF*VERS/A	5.76846	1.70428e-06	-22.6021	41	11	0	22	0	0
13	96125174	rs2768777	ALC:FHA/SPB:F/GLM:OCSD/D	5.76211	1.72937e-06	24.1561	18	8	0	3	8	0
3	72061301	rs9810011	ALC:FHA/SPB:F/GLM:ATF*VERS/CD	5.67433	2.11674e-06	0.891171	8	12	6	0	10	1
2	222467201	rs7604173	ALC:FHA/SPB:F/GLM:ATF*VERS/CD	5.67433	2.11674e-06	-1.36673	11	11	4	8	1	2
7	113707144	rs10228266	ALC:FHA/SPB:F/GLM:ATF*VERS/CD	5.67433	2.11674e-06	-1.46657	10	13	3	8	1	2
19	5382461	rs12985637	ALC:FHA/SPB:F/GLM:ATF*VERS/CD	5.67433	2.11674e-06	-0.574155	10	12	4	3	8	0
1	69122510	rs955093	ALC:FHA/SPB:F/GLM:ATF*VERS/CD	5.67433	2.11674e-06	2.13038	13	10	3	2	8	1
17	6003122	rs2157778	ALC:FHA/SPB:F/GLM:ATF*VERS/CD	5.67433	2.11674e-06	2.20105	9	15	2	1	10	0
14	101062976	rs8003403	ALC:FHA/SPB:F/GLM:ATF*VERS/CD	5.67433	2.11674e-06	2.80738	9	15	2	1	9	1
7	157506529	rs11764996	ALC:FHA/SPB:F/GLM:ATF*VERS/CD	5.67433	2.11674e-06	2.80575	8	12	6	0	7	4
1	95991909	rs321269	ALC:FHA/SPB:F/GLM:ATF*VERS/CD	5.67433	2.11674e-06	2.98386	13	11	2	1	9	1
8	60094550	rs2611357	ALC:FHA/SPB:F/GLM:ATF*VERS/CD	5.67433	2.11674e-06	-0.167296	9	12	5	2	8	1
1	205844544	rs11240574	ALC:FHA/SPB:F/GLM:ATF*VERS/CD	5.67433	2.11674e-06	-0.92159	11	12	3	6	3	2
21	44751182	rs635189	ALC:FHA/SPB:F/GLM:ATF*VERS/CD	5.67433	2.11674e-06	2.43205	8	13	5	1	8	2
8	60998511	rs10957177	ALC:FHA/SPB:F/GLM:ATF*VERS/CD	5.67433	2.11674e-06	-0.904864	12	12	2	7	2	2
8	130402666	rs11993741	ALC:FHA/SPB:F/GLM:ATF*VERS/CD	5.67433	2.11674e-06	2.61556	10	10	6	2	8	1
8	135187451	rs7016543	ALC:FHA/SPB:F/GLM:ATF*VERS/CD	5.67433	2.11674e-06	178.534	9	13	4	2	6	3
7	51449280	rs12533007	ALC:FHA/SPB:F/GLM:ATF*VERS/CD	5.67433	2.11674e-06	-0.933809	8	11	7	6	2	3
18	31567005	rs9963820	ALC:FHA/SPB:F/GLM:ATF*VERS/CD	5.67433	2.11674e-06	175.419	12	10	4	2	5	4
4	36054015	rs7676461	ALC:FHA/SPB:F/GLM:ATF*VERS/CD	5.67433	2.11674e-06	-0.356654	14	9	3	6	5	0
18	5246399	rs8576	ALC:FHA/SPB:F/GLM:ATF*VERS/CD	5.67433	2.11674e-06	0.806542	8	13	5	2	9	0
1	12069994	rs4491070	ALC:FHA/SPB:F/GLM:ATF*VERS/CD	5.67433	2.11674e-06	-0.951529	8	13	5	3	8	0
11	113272320	rs2552516	ALC:FHA/SPB:F/GLM:ATF*VERS/CD	5.67433	2.11674e-06	-2.86213	9	14	3	7	3	1
12	102569772	rs10860878	ALC:FHA/SPB:F/GLM:ATF*VERS/CD	5.67433	2.11674e-06	172.678	8	10	8	2	3	6
1	68215246	rs989842	ALC:FHA/SPB:F/GLM:ATF*VERS/CD	5.67433	2.11674e-06	-173.77	7	12	7	7	3	1
1	95933927	rs4376787	ALC:FHA/SPB:F/GLM:ATF*VERS/CD	5.67433	2.11674e-06	2.63798	13	11	2	2	8	1
6	18037850	rs6459587	ALC:FHA/SPB:F/GLM:ATF*VERS/CD	5.67433	2.11674e-06	-0.885635	8	9	9	2	7	2
4	116078416	rs814397	ALC:FHA/SPB:F/GLM:ATF*VERS/CD	5.67433	2.11674e-06	-170.493	13	8	5	8	3	0
6	161640427	rs6455745	ALC:FHA/SPB:F/GLM:ATF*VERS/CD	5.67433	2.11674e-06	-2.00815	11	10	5	8	1	2
20	10772589	rs6040146	ALC:FHA/SPB:F/GLM:ATF*VERS/CD	5.67433	2.11674e-06	2.96562	12	12	2	3	7	1
12	128763769	rs2895117	ALC:FHA/SPB:F/GLM:ATF*VERS/CD	5.67433	2.11674e-06	-1.42498	7	13	6	5	3	3
3	179446764	rs12632246	ALC:FHA/SPB:F/GLM:ATF*VERS/CD	5.67433	2.11674e-06	1.62621	8	15	3	1	9	1
5	123012853	rs1871180	ALC:FHA/SPB:F/GLM:ATF*VERS/CD	5.67433	2.11674e-06	-0.646898	12	9	5	7	0	4
12	92520614	rs1546608	ALC:FHA/SPB:F/GLM:ATF*VERS/CD	5.67433	2.11674e-06	561.851	11	9	6	1	5	5
10	97640457	rs3814557	ALC:FHA/SPB:F/GLM:ATF*VERS/CD	5.67433	2.11674e-06	1708.36	10	14	2	3	7	1
7	82718712	rs7806760	ALC:FHA/SPB:F/GLM:ATF*VERS/CD	5.67433	2.11674e-06	-0.545617	6	16	4	5	4	2
13	105487313	rs947267	ALC:FHA/SPB:F/GLM:ATF*VERS/CD	5.67433	2.11674e-06	-0.905474	7	13	6	4	4	3
3	189873036	rs9840360	ALC:FHA/SPB:F/GLM:ATF*VERS/CD	5.67433	2.11674e-06	0.736811	14	10	2	3	8	0
2	70935956	rs11681642	ALC:FHA/SPB:F/GLM:ATF*VERS/CD	5.67433	2.11674e-06	-6.11198	8	11	7	6	4	1
15	68014109	rs11071974	ALC:FHA/SPB:F/GLM:ATF*VERS/CD	5.67433	2.11674e-06	0.666333	6	14	6	3	4	4
4	125248997	rs9998852	ALC:FHA/SPB:F/GLM:ATF*VERS/CD	5.67433	2.11674e-06	1654183399581220	14	9	3	5	4	2
11	67634891	rs3758938	ALC:FHA/SPB:F/GLM:ATF*VERS/CD	5.67433	2.11674e-06	2.72375	15	8	3	2	7	2
11	67634891	rs3758938	ALC:FHA/SPB:F/GLM:ATF*VERS/D	5.37807	4.18728e-06	1099.7	15	11	0	2	9	0
8	2888229	rs13265251	ALC:FHA/SPB:F/GLM:ATF*VERS/CD	5.67433	2.11674e-06	0.419933	10	10	6	3	6	2
3	176253373	rs12631161	ALC:FHA/SPB:F/GLM:ATF*VERS/CD	5.67433	2.11674e-06	-0.663536	6	12	8	2	8	1
3	176303641	rs28672729	ALC:FHA/SPB:F/GLM:ATF*VERS/CD	5.67433	2.11674e-06	-0.663536	6	12	8	2	8	1
2	3866616	rs2168046	ALC:FHA/SPB:F/GLM:ATF*VERS/CD	5.67433	2.11674e-06	0.543017	12	9	5	3	7	1
1	236966996	rs1252126	ALC:FHA/SPB:F/GLM:ATF*VERS/CD	5.67433	2.11674e-06	1.66569	12	10	4	2	7	2
6	138840913	rs9376376	ALC:FHA/SPB:F/GLM:ATF*VERS/CD	5.67433	2.11674e-06	0.751528	13	10	3	3	8	0
2	50933422	rs13028294	ALC:FHA/SPB:F/GLM:ATF*VERS/CD	5.67433	2.11674e-06	-2.49384	9	13	4	6	3	2
3	112794511	rs10804503	ALC:FHA/SPB:F/GLM:ATF*VERS/CD	5.67433	2.11674e-06	-1083.69	10	9	7	7	4	0
11	19963955	rs7950088	ALC:FHA/SPB:F/GLM:ATF*VERS/CD	5.67433	2.11674e-06	0.789258	7	15	4	3	4	4
10	93977298	rs11187749	ALC:FHA/SPB:F/GLM:ATF*VERS/CD	5.67433	2.11674e-06	-3.29324	8	12	6	6	4	1
7	78016414	rs2428918	ALC:FHA/SPB:F/GLM:ATF*VERS/CD	5.67433	2.11674e-06	2.09596	16	7	3	4	5	2
17	9226155	rs75382388	ALC:FHA/SPB:F/GLM:ATF*VERS/CD	5.67433	2.11674e-06	1.13997	6	14	6	3	3	5
11	62111414	rs368647816	ALC:FHA/SPB:F/GLM:ATF*VERS/CD	5.67433	2.11674e-06	2.0076	12	11	3	2	7	2
16	56951227	rs9989419	ALC:FHA/SPB:F/GLM:ATF*VERS/CD	5.67433	2.11674e-06	-0.344295	10	12	4	6	2	3
4	74756007	rs11734944	ALC:FHA/SPB:F/GLM:ATF*VERS/CD	5.67433	2.11674e-06	0.457114	7	15	4	3	5	3
1	217082438	rs7539648	ALC:FHA/SPB:F/GLM:ATF*VERS/CD	5.67433	2.11674e-06	3.63523	9	11	6	2	4	5
7	147640650	rs7783626	ALC:FHA/SPB:F/GLM:VAS/D	5.67423	2.11722e-06	8.23533	15	11	0	2	9	0
12	51215816	rs6580809	ALC:FHA/SPB:F/GLM:SAI/CD	5.66916	2.1421e-06	27.499	12	11	3	0	8	3
12	51215816	rs6580809	ALC:FHA/SPB:F/GLM:VAS/D	5.4028	3.95552e-06	24.8244	12	14	0	0	11	0
12	51215816	rs6580809	ALC:FHA/SPB:F/GLM:ATF*VERS/D	5.3845	4.1257e-06	81.789	12	14	0	0	11	0
12	51215816	rs6580809	ALC:FHA/SPB:F/GLM:SAI/D	5.37619	4.20538e-06	22.0319	12	14	0	0	11	0
12	51215816	rs6580809	ALC:FHA/SPB:F/GLM/D	5.31017	4.89591e-06	20.8654	12	14	0	0	11	0
9	135450423	rs17040221	ALC:FHA/SPB/GLM:ATF*VERS/CD	5.5725	2.67607e-06	18.028	177	15	0	90	15	0
9	135450423	rs17040221	ALC:FHA/SPB/GLM:ATF*VERS/D	5.5725	2.67607e-06	18.028	177	15	0	90	15	0
5	11336562	rs32136	ALC:FHA/SPB:M/GLM:VAS/R	5.56444	2.7262e-06	-18.0898	154	12	0	94	0	0
5	11336562	rs32136	ALC:FHA/SPB:M/GLM:PACS/R	5.53812	2.89653e-06	-18.0706	154	12	0	94	0	0
5	11336562	rs32136	ALC:FHA/SPB:M/GLM/R	5.40137	3.96857e-06	-18.015	154	12	0	94	0	0
5	11336562	rs32136	ALC:FHA/SPB:M/GLM:TAI/R	5.39477	4.02932e-06	-18.012	154	12	0	94	0	0
5	11336562	rs32136	ALC:FHA/SPB:M/GLM:SAI/R	5.38821	4.09065e-06	-18.011	154	12	0	94	0	0
4	117472456	rs17861959	ALC:FHA/SPB/GLM:TAI/D	5.55929	2.75875e-06	2.16633	158	34	0	75	30	0
4	117472456	rs17861959	ALC:FHA/SPB/GLM:ATF*VERS/D	5.44012	3.6298e-06	2.13447	158	34	0	75	30	0
4	117472456	rs17861959	ALC:FHA/SPB/GLM:SAI/D	5.43924	3.63714e-06	2.13534	158	34	0	75	30	0
4	117472456	rs17861959	ALC:FHA/SPB/GLM:OCSD/D	5.42028	3.7994e-06	2.15481	158	34	0	75	30	0
4	117472456	rs17861959	ALC:FHA/SPB/GLM:VAS/D	5.39357	4.04045e-06	2.11914	158	34	0	75	30	0
4	117472456	rs17861959	ALC:FHA/SPB/GLM/D	5.38754	4.09695e-06	2.11626	158	34	0	75	30	0
4	117472456	rs17861959	ALC:FHA/SPB/GLM:PACS/D	5.38752	4.09711e-06	2.11637	158	34	0	75	30	0
2	45800968	rs10164633	ALC:FHA/SPB:F/GLM:PACS/D	5.52699	2.9717e-06	-23.9873	16	10	0	11	0	0
1	239831606	rs685548	ALC:FHA/SPB:F/GLM:ATF*VERS/A	5.52128	3.01109e-06	-4.54135	29	23	0	19	3	0
6	164640402	rs9459170	ALC:FHA/SPB/GLM:VAS/D	5.42397	3.76731e-06	1.53528	129	63	0	56	49	0
6	164640402	rs9459170	ALC:FHA/SPB/GLM:PACS/D	5.41652	3.83246e-06	1.5337	129	63	0	56	49	0
6	164640402	rs9459170	ALC:FHA/SPB/GLM/D	5.37201	4.24608e-06	1.51787	129	63	0	56	49	0
6	164640402	rs9459170	ALC:FHA/SPB/GLM:SAI/D	5.3709	4.25693e-06	1.51775	129	63	0	56	49	0
6	164640402	rs9459170	ALC:FHA/SPB/GLM:TAI/D	5.31945	4.79232e-06	1.51278	129	63	0	56	49	0
20	20247899	rs6075634	ALC:FHA/SPB:F/GLM:ATF*VERS/D	5.38784	4.09413e-06	-207.872	13	13	0	9	2	0
20	24432851	rs6049679	ALC:FHA/SPB:F/GLM:ATF*VERS/D	5.38784	4.09413e-06	131.761	10	16	0	1	10	0
6	88116718	rs9359765	ALC:FHA/SPB:F/GLM:ATF*VERS/D	5.38784	4.09413e-06	127.828	13	13	0	1	10	0
5	124080372	rs6871469	ALC:FHA/SPB:F/GLM:ATF*VERS/D	5.3845	4.1257e-06	-336.532	14	12	0	9	2	0
1	217082915	rs6604652	ALC:FHA/SPB:F/GLM:ATF*VERS/D	5.3845	4.1257e-06	-1093.85	12	14	0	8	3	0
13	95718039	rs6492817	ALC:FHA/SPB:F/GLM:OCSD/D	5.3793	4.17542e-06	24.9929	19	7	0	4	7	0
10	36810795	rs12571505	ALC:FHA/SPB:F/GLM:ATF*VERS/D	5.37807	4.18728e-06	339.105	14	12	0	2	9	0
17	75963776	rs8065144	ALC:FHA/SPB:F/GLM:ATF*VERS/D	5.37807	4.18728e-06	1098.87	15	11	0	3	8	0
17	32656766	rs2543970	ALC:FHA/SPB:F/GLM:ATF*VERS/D	5.37708	4.19678e-06	-339.503	13	13	0	8	3	0
1	163187336	rs4657252	ALC:FHA/SPB:F/GLM:ATF*VERS/CD	5.37708	4.19678e-06	-336.014	14	12	0	9	2	0
1	163187336	rs4657252	ALC:FHA/SPB:F/GLM:ATF*VERS/D	5.37708	4.19678e-06	-336.014	14	12	0	9	2	0
11	16830404	rs402982	ALC:FHA/SPB:F/GLM:ATF*VERS/CD	5.37708	4.19678e-06	-1106.88	14	12	0	9	2	0
11	16830404	rs402982	ALC:FHA/SPB:F/GLM:ATF*VERS/D	5.37708	4.19678e-06	-1106.88	14	12	0	9	2	0
7	77279587	rs56767501	ALC:FHA/SPB:F/GLM:ATF*VERS/D	5.37708	4.19678e-06	-1089.7	13	13	0	9	2	0
7	77279171	rs11976501	ALC:FHA/SPB:F/GLM:ATF*VERS/D	5.37708	4.19678e-06	-1088.69	12	14	0	9	2	0
7	77279718	rs6958464	ALC:FHA/SPB:F/GLM:ATF*VERS/D	5.37708	4.19678e-06	-1088.69	12	14	0	9	2	0
6	81690194	rs10943829	ALC:FHA/SPB:F/GLM:ATF*VERS/D	5.37708	4.19678e-06	-1085.24	9	17	0	7	4	0
7	11782985	rs7793467	ALC:FHA/SPB/GLM:TAI/A	5.35703	4.39513e-06	0.961184	203	181	0	89	121	0
