# Supplementary material for: A Genome-Wide Association Study Reveals New Genes in a Molecular Network Associated With Alcohol Dependence and Related Clinical Measures
Source: Preprints.org preprint supplement (doi:10.20944/preprints202208.0178.v1), 2022-08-09
Supplement: Supplementary file 2 [file List of Supplementary Tables.docx]

# Supplementary Tables

| **Description** | **Destination file** |
| --- | --- |
| Table S1A. List of SNP-based statistical tests of association and patient counts for AD (411586 SNPs) | Table S1.xlsx |
| Table S1B. List of SNP-based statistical tests of association and patient counts for AD-related phenotypes (381084 SNPs) | Table S1.xlsx |
| Table S1C. List of SNP-based statistical tests of association and patient counts for family history (381084 SNPs) | Table S1.xlsx |
| Table S2A. GWAS results for AD (p-values < 5×10-6 and replicated associations) | Table S2.xlsx |
| Table S2B. GWAS results for AD-related phenotypes (p-values < 5×10-6 and replicated associations) | Table S2.xlsx |
| Table S2C. GWAS results for family history (p-values < 5×10-6 and replicated associations) | Table S2.xlsx |
| Table S3A. Signal localization: top adjusted p-values (< 10-5) and joint regions (localization radius 10 SNPs) | Table S3.xlsx |
| Table S3B. Signal localization: top adjusted p-values (< 10-5) and joint regions (localization radius 20 SNPs) | Table S3.xlsx |
| Table S3C. Signal localization: top adjusted p-values (< 10-5) and joint regions (localization radius 35 SNPs) | Table S3.xlsx |
| Table S3D. Signal localization: top adjusted p-values (< 10-5) and joint regions (localization radius 50 SNPs) | Table S3.xlsx |
| Table S3E. Signal localization: top adjusted p-values (< 10-5) and joint regions (localization radius 100 SNPs) | Table S3.xlsx |
| Table S3F. Signal localization: top adjusted p-values (< 10-5) and joint regions (localization radius 50000 bp) | Table S3.xlsx |
| Table S3G. Signal localization: top adjusted p-values (< 10-5) and joint regions (localization radius 100000 bp) | Table S3.xlsx |
| Table S4. Genomic regions and genes associated with AD and related phenotypes | Table S4.xlsx |
| Table S5. Previously published genes associated with alcohol dependence or consumption | Table S5.xlsx |
