# Supplementary material for: A Genome-Wide Association Study Reveals New Genes in a Molecular Network Associated With Alcohol Dependence and Related Clinical Measures
Source: Preprints.org preprint supplement (doi:10.20944/preprints202208.0178.v1), 2022-08-09
Supplement: Supplementary file 3 [file Table S1A-C.xlsx]

## Sheet: Table S1A
Table S1A. List of SNP-based statistical tests of association and patient counts for alcohol dependence (411586 SNPs)
Test No.	Test code	Phenotype	Genotype model	Test type	Test data/distribution	QAS meaning1	Cases	Controls	Subjects total
1	ALC:INC/SPB/CAT/CD	Alcohol dependence	Codominant	chi-square	categorical/multinomial	ez2-transformed correlation coefficient2	191	1017	1208
2	ALC:INC/SPB/CAT/D	Alcohol dependence	Dominant	chi-square/Fisher's exact	categorical/multinomial	odds ratio	191	1017	1208
3	ALC:INC/SPB/CAT/R	Alcohol dependence	Recessive	chi-square/Fisher's exact	categorical/multinomial	odds ratio	191	1017	1208
4	ALC:INC/SPB/CAT/A	Alcohol dependence	Allelic	chi-square/Fisher's exact	categorical/multinomial	odds ratio	191	1017	1208
5	ALC:INC/SPB:F/CAT/CD	Alcohol dependence	Codominant	chi-square	categorical/multinomial	ez2-transformed correlation coefficient2	26	194	220
6	ALC:INC/SPB:F/CAT/D	Alcohol dependence	Dominant	chi-square/Fisher's exact	categorical/multinomial	odds ratio	26	194	220
7	ALC:INC/SPB:F/CAT/R	Alcohol dependence	Recessive	chi-square/Fisher's exact	categorical/multinomial	odds ratio	26	194	220
8	ALC:INC/SPB:F/CAT/A	Alcohol dependence	Allelic	chi-square/Fisher's exact	categorical/multinomial	odds ratio	26	194	220
9	ALC:INC/SPB:M/CAT/CD	Alcohol dependence	Codominant	chi-square	categorical/multinomial	ez2-transformed correlation coefficient2	165	823	988
10	ALC:INC/SPB:M/CAT/D	Alcohol dependence	Dominant	chi-square/Fisher's exact	categorical/multinomial	odds ratio	165	823	988
11	ALC:INC/SPB:M/CAT/R	Alcohol dependence	Recessive	chi-square/Fisher's exact	categorical/multinomial	odds ratio	165	823	988
12	ALC:INC/SPB:M/CAT/A	Alcohol dependence	Allelic	chi-square/Fisher's exact	categorical/multinomial	odds ratio	165	823	988
1QAS - quantative association statistic
2We designate (1+ρ)/(1-ρ) as ez2-transformation of correlation coefficient

## Sheet: Table S1B
Table S1B. List of SNP-based statistical tests of association and patient counts for AD-related phenotypes (381084 SNPs)
Test No.	Test code	Phenotype	Covariate	Genotype model	Test type	Test data/distribution	QAS meaning1	Cases
1	ALC:ATF/SPB/GLM:VERS/CD	Amount of alcohol consumed	self-reported or physician-rated	Codominant	Likelihood ratio	ordinal/quasipoisson	Exponentiated slope parameter (regression)	192
2	ALC:ATF/SPB/GLM:VERS/D	Amount of alcohol consumed	self-reported or physician-rated	Dominant	Likelihood ratio	ordinal/quasipoisson	Exponentiated main effect (ANOVA)	192
3	ALC:ATF/SPB/GLM:VERS/R	Amount of alcohol consumed	self-reported or physician-rated	Recessive	Likelihood ratio	ordinal/quasipoisson	Exponentiated main effect (ANOVA)	192
4	ALC:ATF/SPB/GLM:VERS/A	Amount of alcohol consumed	self-reported or physician-rated	Allelic	Likelihood ratio	ordinal/quasipoisson	Exponentiated main effect (ANOVA)	192
5	ALC:ATF/SPB:F/GLM:VERS/CD	Amount of alcohol consumed	self-reported or physician-rated	Codominant	Likelihood ratio	ordinal/quasipoisson	Exponentiated slope parameter (regression)	26
6	ALC:ATF/SPB:F/GLM:VERS/D	Amount of alcohol consumed	self-reported or physician-rated	Dominant	Likelihood ratio	ordinal/quasipoisson	Exponentiated main effect (ANOVA)	26
7	ALC:ATF/SPB:F/GLM:VERS/R	Amount of alcohol consumed	self-reported or physician-rated	Recessive	Likelihood ratio	ordinal/quasipoisson	Exponentiated main effect (ANOVA)	26
8	ALC:ATF/SPB:F/GLM:VERS/A	Amount of alcohol consumed	self-reported or physician-rated	Allelic	Likelihood ratio	ordinal/quasipoisson	Exponentiated main effect (ANOVA)	26
9	ALC:ATF/SPB:M/GLM:VERS/CD	Amount of alcohol consumed	self-reported or physician-rated	Codominant	Likelihood ratio	ordinal/quasipoisson	Exponentiated slope parameter (regression)	166
10	ALC:ATF/SPB:M/GLM:VERS/D	Amount of alcohol consumed	self-reported or physician-rated	Dominant	Likelihood ratio	ordinal/quasipoisson	Exponentiated main effect (ANOVA)	166
11	ALC:ATF/SPB:M/GLM:VERS/R	Amount of alcohol consumed	self-reported or physician-rated	Recessive	Likelihood ratio	ordinal/quasipoisson	Exponentiated main effect (ANOVA)	166
12	ALC:ATF/SPB:M/GLM:VERS/A	Amount of alcohol consumed	self-reported or physician-rated	Allelic	Likelihood ratio	ordinal/quasipoisson	Exponentiated main effect (ANOVA)	166
13	ALC:OCSD/SPB/GLM/CD	Obsessive-Compulsive Drinking Scale		Codominant	Likelihood ratio	ordinal/quasipoisson	Exponentiated slope parameter (regression)	192
14	ALC:OCSD/SPB/GLM/D	Obsessive-Compulsive Drinking Scale		Dominant	Likelihood ratio	ordinal/quasipoisson	Exponentiated main effect (ANOVA)	192
15	ALC:OCSD/SPB/GLM/R	Obsessive-Compulsive Drinking Scale		Recessive	Likelihood ratio	ordinal/quasipoisson	Exponentiated main effect (ANOVA)	192
16	ALC:OCSD/SPB/GLM/A	Obsessive-Compulsive Drinking Scale		Allelic	Likelihood ratio	ordinal/quasipoisson	Exponentiated main effect (ANOVA)	192
17	ALC:OCSD/SPB:F/GLM/CD	Obsessive-Compulsive Drinking Scale		Codominant	Likelihood ratio	ordinal/quasipoisson	Exponentiated slope parameter (regression)	26
18	ALC:OCSD/SPB:F/GLM/D	Obsessive-Compulsive Drinking Scale		Dominant	Likelihood ratio	ordinal/quasipoisson	Exponentiated main effect (ANOVA)	26
19	ALC:OCSD/SPB:F/GLM/R	Obsessive-Compulsive Drinking Scale		Recessive	Likelihood ratio	ordinal/quasipoisson	Exponentiated main effect (ANOVA)	26
20	ALC:OCSD/SPB:F/GLM/A	Obsessive-Compulsive Drinking Scale		Allelic	Likelihood ratio	ordinal/quasipoisson	Exponentiated main effect (ANOVA)	26
21	ALC:OCSD/SPB:M/GLM/CD	Obsessive-Compulsive Drinking Scale		Codominant	Likelihood ratio	ordinal/quasipoisson	Exponentiated slope parameter (regression)	166
22	ALC:OCSD/SPB:M/GLM/D	Obsessive-Compulsive Drinking Scale		Dominant	Likelihood ratio	ordinal/quasipoisson	Exponentiated main effect (ANOVA)	166
23	ALC:OCSD/SPB:M/GLM/R	Obsessive-Compulsive Drinking Scale		Recessive	Likelihood ratio	ordinal/quasipoisson	Exponentiated main effect (ANOVA)	166
24	ALC:OCSD/SPB:M/GLM/A	Obsessive-Compulsive Drinking Scale		Allelic	Likelihood ratio	ordinal/quasipoisson	Exponentiated main effect (ANOVA)	166
25	ALC:PACS/SPB/GLM/CD	Penn alcohol craving scale		Codominant	Likelihood ratio	ordinal/quasipoisson	Exponentiated slope parameter (regression)	192
26	ALC:PACS/SPB/GLM/D	Penn alcohol craving scale		Dominant	Likelihood ratio	ordinal/quasipoisson	Exponentiated main effect (ANOVA)	192
27	ALC:PACS/SPB/GLM/R	Penn alcohol craving scale		Recessive	Likelihood ratio	ordinal/quasipoisson	Exponentiated main effect (ANOVA)	192
28	ALC:PACS/SPB/GLM/A	Penn alcohol craving scale		Allelic	Likelihood ratio	ordinal/quasipoisson	Exponentiated main effect (ANOVA)	192
29	ALC:PACS/SPB:F/GLM/CD	Penn alcohol craving scale		Codominant	Likelihood ratio	ordinal/quasipoisson	Exponentiated slope parameter (regression)	26
30	ALC:PACS/SPB:F/GLM/D	Penn alcohol craving scale		Dominant	Likelihood ratio	ordinal/quasipoisson	Exponentiated main effect (ANOVA)	26
31	ALC:PACS/SPB:F/GLM/R	Penn alcohol craving scale		Recessive	Likelihood ratio	ordinal/quasipoisson	Exponentiated main effect (ANOVA)	26
32	ALC:PACS/SPB:F/GLM/A	Penn alcohol craving scale		Allelic	Likelihood ratio	ordinal/quasipoisson	Exponentiated main effect (ANOVA)	26
33	ALC:PACS/SPB:M/GLM/CD	Penn alcohol craving scale		Codominant	Likelihood ratio	ordinal/quasipoisson	Exponentiated slope parameter (regression)	166
34	ALC:PACS/SPB:M/GLM/D	Penn alcohol craving scale		Dominant	Likelihood ratio	ordinal/quasipoisson	Exponentiated main effect (ANOVA)	166
35	ALC:PACS/SPB:M/GLM/R	Penn alcohol craving scale		Recessive	Likelihood ratio	ordinal/quasipoisson	Exponentiated main effect (ANOVA)	166
36	ALC:PACS/SPB:M/GLM/A	Penn alcohol craving scale		Allelic	Likelihood ratio	ordinal/quasipoisson	Exponentiated main effect (ANOVA)	166
37	ALC:SAI/SPB/GLM/CD	Spielberger State Anxiety Inventory		Codominant	Likelihood ratio	ordinal/quasipoisson	Exponentiated slope parameter (regression)	192
38	ALC:SAI/SPB/GLM/D	Spielberger State Anxiety Inventory		Dominant	Likelihood ratio	ordinal/quasipoisson	Exponentiated main effect (ANOVA)	192
39	ALC:SAI/SPB/GLM/R	Spielberger State Anxiety Inventory		Recessive	Likelihood ratio	ordinal/quasipoisson	Exponentiated main effect (ANOVA)	192
40	ALC:SAI/SPB/GLM/A	Spielberger State Anxiety Inventory		Allelic	Likelihood ratio	ordinal/quasipoisson	Exponentiated main effect (ANOVA)	192
41	ALC:SAI/SPB:F/GLM/CD	Spielberger State Anxiety Inventory		Codominant	Likelihood ratio	ordinal/quasipoisson	Exponentiated slope parameter (regression)	26
42	ALC:SAI/SPB:F/GLM/D	Spielberger State Anxiety Inventory		Dominant	Likelihood ratio	ordinal/quasipoisson	Exponentiated main effect (ANOVA)	26
43	ALC:SAI/SPB:F/GLM/R	Spielberger State Anxiety Inventory		Recessive	Likelihood ratio	ordinal/quasipoisson	Exponentiated main effect (ANOVA)	26
44	ALC:SAI/SPB:F/GLM/A	Spielberger State Anxiety Inventory		Allelic	Likelihood ratio	ordinal/quasipoisson	Exponentiated main effect (ANOVA)	26
45	ALC:SAI/SPB:M/GLM/CD	Spielberger State Anxiety Inventory		Codominant	Likelihood ratio	ordinal/quasipoisson	Exponentiated slope parameter (regression)	166
46	ALC:SAI/SPB:M/GLM/D	Spielberger State Anxiety Inventory		Dominant	Likelihood ratio	ordinal/quasipoisson	Exponentiated main effect (ANOVA)	166
47	ALC:SAI/SPB:M/GLM/R	Spielberger State Anxiety Inventory		Recessive	Likelihood ratio	ordinal/quasipoisson	Exponentiated main effect (ANOVA)	166
48	ALC:SAI/SPB:M/GLM/A	Spielberger State Anxiety Inventory		Allelic	Likelihood ratio	ordinal/quasipoisson	Exponentiated main effect (ANOVA)	166
49	ALC:TAI/SPB/GLM/CD	Spielberger Trait Anxiety Inventory		Codominant	Likelihood ratio	ordinal/quasipoisson	Exponentiated slope parameter (regression)	192
50	ALC:TAI/SPB/GLM/D	Spielberger Trait Anxiety Inventory		Dominant	Likelihood ratio	ordinal/quasipoisson	Exponentiated main effect (ANOVA)	192
51	ALC:TAI/SPB/GLM/R	Spielberger Trait Anxiety Inventory		Recessive	Likelihood ratio	ordinal/quasipoisson	Exponentiated main effect (ANOVA)	192
52	ALC:TAI/SPB/GLM/A	Spielberger Trait Anxiety Inventory		Allelic	Likelihood ratio	ordinal/quasipoisson	Exponentiated main effect (ANOVA)	192
53	ALC:TAI/SPB:F/GLM/CD	Spielberger Trait Anxiety Inventory		Codominant	Likelihood ratio	ordinal/quasipoisson	Exponentiated slope parameter (regression)	26
54	ALC:TAI/SPB:F/GLM/D	Spielberger Trait Anxiety Inventory		Dominant	Likelihood ratio	ordinal/quasipoisson	Exponentiated main effect (ANOVA)	26
55	ALC:TAI/SPB:F/GLM/R	Spielberger Trait Anxiety Inventory		Recessive	Likelihood ratio	ordinal/quasipoisson	Exponentiated main effect (ANOVA)	26
56	ALC:TAI/SPB:F/GLM/A	Spielberger Trait Anxiety Inventory		Allelic	Likelihood ratio	ordinal/quasipoisson	Exponentiated main effect (ANOVA)	26
57	ALC:TAI/SPB:M/GLM/CD	Spielberger Trait Anxiety Inventory		Codominant	Likelihood ratio	ordinal/quasipoisson	Exponentiated slope parameter (regression)	166
58	ALC:TAI/SPB:M/GLM/D	Spielberger Trait Anxiety Inventory		Dominant	Likelihood ratio	ordinal/quasipoisson	Exponentiated main effect (ANOVA)	166
59	ALC:TAI/SPB:M/GLM/R	Spielberger Trait Anxiety Inventory		Recessive	Likelihood ratio	ordinal/quasipoisson	Exponentiated main effect (ANOVA)	166
60	ALC:TAI/SPB:M/GLM/A	Spielberger Trait Anxiety Inventory		Allelic	Likelihood ratio	ordinal/quasipoisson	Exponentiated main effect (ANOVA)	166
61	ALC:VAS/SPB/GLM/CD	Visual analog scale		Codominant	Likelihood ratio	ordinal/quasipoisson	Exponentiated slope parameter (regression)	192
62	ALC:VAS/SPB/GLM/D	Visual analog scale		Dominant	Likelihood ratio	ordinal/quasipoisson	Exponentiated main effect (ANOVA)	192
63	ALC:VAS/SPB/GLM/R	Visual analog scale		Recessive	Likelihood ratio	ordinal/quasipoisson	Exponentiated main effect (ANOVA)	192
64	ALC:VAS/SPB/GLM/A	Visual analog scale		Allelic	Likelihood ratio	ordinal/quasipoisson	Exponentiated main effect (ANOVA)	192
65	ALC:VAS/SPB:F/GLM/CD	Visual analog scale		Codominant	Likelihood ratio	ordinal/quasipoisson	Exponentiated slope parameter (regression)	26
66	ALC:VAS/SPB:F/GLM/D	Visual analog scale		Dominant	Likelihood ratio	ordinal/quasipoisson	Exponentiated main effect (ANOVA)	26
67	ALC:VAS/SPB:F/GLM/R	Visual analog scale		Recessive	Likelihood ratio	ordinal/quasipoisson	Exponentiated main effect (ANOVA)	26
68	ALC:VAS/SPB:F/GLM/A	Visual analog scale		Allelic	Likelihood ratio	ordinal/quasipoisson	Exponentiated main effect (ANOVA)	26
69	ALC:VAS/SPB:M/GLM/CD	Visual analog scale		Codominant	Likelihood ratio	ordinal/quasipoisson	Exponentiated slope parameter (regression)	166
70	ALC:VAS/SPB:M/GLM/D	Visual analog scale		Dominant	Likelihood ratio	ordinal/quasipoisson	Exponentiated main effect (ANOVA)	166
71	ALC:VAS/SPB:M/GLM/R	Visual analog scale		Recessive	Likelihood ratio	ordinal/quasipoisson	Exponentiated main effect (ANOVA)	166
72	ALC:VAS/SPB:M/GLM/A	Visual analog scale		Allelic	Likelihood ratio	ordinal/quasipoisson	Exponentiated main effect (ANOVA)	166
73	ALC:ATF/SPB/LM:VERS/CD	Amount of alcohol consumed	self-reported or physician-rated	Codominant	F-test	numeric/normal	Exponentiated slope parameter (linear regression)	192
74	ALC:ATF/SPB/LM:VERS/D	Amount of alcohol consumed	self-reported or physician-rated	Dominant	F-test	numeric/normal	Exponentiated difference in means	192
75	ALC:ATF/SPB/LM:VERS/R	Amount of alcohol consumed	self-reported or physician-rated	Recessive	F-test	numeric/normal	Exponentiated difference in means	192
76	ALC:ATF/SPB/LM:VERS/A	Amount of alcohol consumed	self-reported or physician-rated	Allelic	F-test	numeric/normal	Exponentiated difference in means	192
77	ALC:OCSD/SPB/LM/CD	Obsessive-Compulsive Drinking Scale		Codominant	F-test	numeric/normal	Exponentiated slope parameter (linear regression)	192
78	ALC:OCSD/SPB/LM/D	Obsessive-Compulsive Drinking Scale		Dominant	F-test	numeric/normal	Exponentiated difference in means	192
79	ALC:OCSD/SPB/LM/R	Obsessive-Compulsive Drinking Scale		Recessive	F-test	numeric/normal	Exponentiated difference in means	192
80	ALC:OCSD/SPB/LM/A	Obsessive-Compulsive Drinking Scale		Allelic	F-test	numeric/normal	Exponentiated difference in means	192
81	ALC:PACS/SPB/LM/CD	Penn alcohol craving scale		Codominant	F-test	numeric/normal	Exponentiated slope parameter (linear regression)	192
82	ALC:PACS/SPB/LM/D	Penn alcohol craving scale		Dominant	F-test	numeric/normal	Exponentiated difference in means	192
83	ALC:PACS/SPB/LM/R	Penn alcohol craving scale		Recessive	F-test	numeric/normal	Exponentiated difference in means	192
84	ALC:PACS/SPB/LM/A	Penn alcohol craving scale		Allelic	F-test	numeric/normal	Exponentiated difference in means	192
85	ALC:SAI/SPB/LM/CD	Spielberger State Anxiety Inventory		Codominant	F-test	numeric/normal	Exponentiated slope parameter (linear regression)	192
86	ALC:SAI/SPB/LM/D	Spielberger State Anxiety Inventory		Dominant	F-test	numeric/normal	Exponentiated difference in means	192
87	ALC:SAI/SPB/LM/R	Spielberger State Anxiety Inventory		Recessive	F-test	numeric/normal	Exponentiated difference in means	192
88	ALC:SAI/SPB/LM/A	Spielberger State Anxiety Inventory		Allelic	F-test	numeric/normal	Exponentiated difference in means	192
89	ALC:TAI/SPB/LM/CD	Spielberger Trait Anxiety Inventory		Codominant	F-test	numeric/normal	Exponentiated slope parameter (linear regression)	192
90	ALC:TAI/SPB/LM/D	Spielberger Trait Anxiety Inventory		Dominant	F-test	numeric/normal	Exponentiated difference in means	192
91	ALC:TAI/SPB/LM/R	Spielberger Trait Anxiety Inventory		Recessive	F-test	numeric/normal	Exponentiated difference in means	192
92	ALC:TAI/SPB/LM/A	Spielberger Trait Anxiety Inventory		Allelic	F-test	numeric/normal	Exponentiated difference in means	192
93	ALC:VAS/SPB/LM/CD	Visual analog scale		Codominant	F-test	numeric/normal	Exponentiated slope parameter (linear regression)	192
94	ALC:VAS/SPB/LM/D	Visual analog scale		Dominant	F-test	numeric/normal	Exponentiated difference in means	192
95	ALC:VAS/SPB/LM/R	Visual analog scale		Recessive	F-test	numeric/normal	Exponentiated difference in means	192
96	ALC:VAS/SPB/LM/A	Visual analog scale		Allelic	F-test	numeric/normal	Exponentiated difference in means	192
1QAS - quantative association statistic

## Sheet: Table S1C
Table S1C. List of SNP-based statistical tests of association and patient counts for family history (381084 SNPs)
Test No.	Test code	Phenotype	Covariate	Genotype model	Statistical model	Test type	Test data/distribution	QAS meaning1	Family history	No family history	Cases total
1	ALC:FHA/SPB/GLM:ATF*VERS/CD	Family history of AD	Amount of alcohol consumed : self-reported or physician-rated	Codominant	Logistic regression (GLM)	Likelihood ratio	categorical/binomial	elrs2	105	87	192
2	ALC:FHA/SPB/GLM:ATF*VERS/D	Family history of AD	Amount of alcohol consumed : self-reported or physician-rated	Dominant	Logistic regression (GLM)	Likelihood ratio	categorical/binomial	odds ratio	105	87	192
3	ALC:FHA/SPB/GLM:ATF*VERS/R	Family history of AD	Amount of alcohol consumed : self-reported or physician-rated	Recessive	Logistic regression (GLM)	Likelihood ratio	categorical/binomial	odds ratio	105	87	192
4	ALC:FHA/SPB/GLM:ATF*VERS/A	Family history of AD	Amount of alcohol consumed : self-reported or physician-rated	Allelic	Logistic regression (GLM)	Likelihood ratio	categorical/binomial	odds ratio	105	87	192
5	ALC:FHA/SPB:F/GLM:ATF*VERS/CD	Family history of AD	Amount of alcohol consumed : self-reported or physician-rated	Codominant	Logistic regression (GLM)	Likelihood ratio	categorical/binomial	elrs2	11	15	26
6	ALC:FHA/SPB:F/GLM:ATF*VERS/D	Family history of AD	Amount of alcohol consumed : self-reported or physician-rated	Dominant	Logistic regression (GLM)	Likelihood ratio	categorical/binomial	odds ratio	11	15	26
7	ALC:FHA/SPB:F/GLM:ATF*VERS/R	Family history of AD	Amount of alcohol consumed : self-reported or physician-rated	Recessive	Logistic regression (GLM)	Likelihood ratio	categorical/binomial	odds ratio	11	15	26
8	ALC:FHA/SPB:F/GLM:ATF*VERS/A	Family history of AD	Amount of alcohol consumed : self-reported or physician-rated	Allelic	Logistic regression (GLM)	Likelihood ratio	categorical/binomial	odds ratio	11	15	26
9	ALC:FHA/SPB:M/GLM:ATF*VERS/CD	Family history of AD	Amount of alcohol consumed : self-reported or physician-rated	Codominant	Logistic regression (GLM)	Likelihood ratio	categorical/binomial	elrs2	94	72	166
10	ALC:FHA/SPB:M/GLM:ATF*VERS/D	Family history of AD	Amount of alcohol consumed : self-reported or physician-rated	Dominant	Logistic regression (GLM)	Likelihood ratio	categorical/binomial	odds ratio	94	72	166
11	ALC:FHA/SPB:M/GLM:ATF*VERS/R	Family history of AD	Amount of alcohol consumed : self-reported or physician-rated	Recessive	Logistic regression (GLM)	Likelihood ratio	categorical/binomial	odds ratio	94	72	166
12	ALC:FHA/SPB:M/GLM:ATF*VERS/A	Family history of AD	Amount of alcohol consumed : self-reported or physician-rated	Allelic	Logistic regression (GLM)	Likelihood ratio	categorical/binomial	odds ratio	94	72	166
13	ALC:FHA/SPB/GLM:OCSD/CD	Family history of AD	Obsessive-Compulsive Drinking Scale	Codominant	Logistic regression (GLM)	Likelihood ratio	categorical/binomial	elrs2	105	87	192
14	ALC:FHA/SPB/GLM:OCSD/D	Family history of AD	Obsessive-Compulsive Drinking Scale	Dominant	Logistic regression (GLM)	Likelihood ratio	categorical/binomial	odds ratio	105	87	192
15	ALC:FHA/SPB/GLM:OCSD/R	Family history of AD	Obsessive-Compulsive Drinking Scale	Recessive	Logistic regression (GLM)	Likelihood ratio	categorical/binomial	odds ratio	105	87	192
16	ALC:FHA/SPB/GLM:OCSD/A	Family history of AD	Obsessive-Compulsive Drinking Scale	Allelic	Logistic regression (GLM)	Likelihood ratio	categorical/binomial	odds ratio	105	87	192
17	ALC:FHA/SPB:F/GLM:OCSD/CD	Family history of AD	Obsessive-Compulsive Drinking Scale	Codominant	Logistic regression (GLM)	Likelihood ratio	categorical/binomial	elrs2	11	15	26
18	ALC:FHA/SPB:F/GLM:OCSD/D	Family history of AD	Obsessive-Compulsive Drinking Scale	Dominant	Logistic regression (GLM)	Likelihood ratio	categorical/binomial	odds ratio	11	15	26
19	ALC:FHA/SPB:F/GLM:OCSD/R	Family history of AD	Obsessive-Compulsive Drinking Scale	Recessive	Logistic regression (GLM)	Likelihood ratio	categorical/binomial	odds ratio	11	15	26
20	ALC:FHA/SPB:F/GLM:OCSD/A	Family history of AD	Obsessive-Compulsive Drinking Scale	Allelic	Logistic regression (GLM)	Likelihood ratio	categorical/binomial	odds ratio	11	15	26
21	ALC:FHA/SPB:M/GLM:OCSD/CD	Family history of AD	Obsessive-Compulsive Drinking Scale	Codominant	Logistic regression (GLM)	Likelihood ratio	categorical/binomial	elrs2	94	72	166
22	ALC:FHA/SPB:M/GLM:OCSD/D	Family history of AD	Obsessive-Compulsive Drinking Scale	Dominant	Logistic regression (GLM)	Likelihood ratio	categorical/binomial	odds ratio	94	72	166
23	ALC:FHA/SPB:M/GLM:OCSD/R	Family history of AD	Obsessive-Compulsive Drinking Scale	Recessive	Logistic regression (GLM)	Likelihood ratio	categorical/binomial	odds ratio	94	72	166
24	ALC:FHA/SPB:M/GLM:OCSD/A	Family history of AD	Obsessive-Compulsive Drinking Scale	Allelic	Logistic regression (GLM)	Likelihood ratio	categorical/binomial	odds ratio	94	72	166
25	ALC:FHA/SPB/GLM:PACS/CD	Family history of AD	Penn alcohol craving scale	Codominant	Logistic regression (GLM)	Likelihood ratio	categorical/binomial	elrs2	105	87	192
26	ALC:FHA/SPB/GLM:PACS/D	Family history of AD	Penn alcohol craving scale	Dominant	Logistic regression (GLM)	Likelihood ratio	categorical/binomial	odds ratio	105	87	192
27	ALC:FHA/SPB/GLM:PACS/R	Family history of AD	Penn alcohol craving scale	Recessive	Logistic regression (GLM)	Likelihood ratio	categorical/binomial	odds ratio	105	87	192
28	ALC:FHA/SPB/GLM:PACS/A	Family history of AD	Penn alcohol craving scale	Allelic	Logistic regression (GLM)	Likelihood ratio	categorical/binomial	odds ratio	105	87	192
29	ALC:FHA/SPB:F/GLM:PACS/CD	Family history of AD	Penn alcohol craving scale	Codominant	Logistic regression (GLM)	Likelihood ratio	categorical/binomial	elrs2	11	15	26
30	ALC:FHA/SPB:F/GLM:PACS/D	Family history of AD	Penn alcohol craving scale	Dominant	Logistic regression (GLM)	Likelihood ratio	categorical/binomial	odds ratio	11	15	26
31	ALC:FHA/SPB:F/GLM:PACS/R	Family history of AD	Penn alcohol craving scale	Recessive	Logistic regression (GLM)	Likelihood ratio	categorical/binomial	odds ratio	11	15	26
32	ALC:FHA/SPB:F/GLM:PACS/A	Family history of AD	Penn alcohol craving scale	Allelic	Logistic regression (GLM)	Likelihood ratio	categorical/binomial	odds ratio	11	15	26
33	ALC:FHA/SPB:M/GLM:PACS/CD	Family history of AD	Penn alcohol craving scale	Codominant	Logistic regression (GLM)	Likelihood ratio	categorical/binomial	elrs2	94	72	166
34	ALC:FHA/SPB:M/GLM:PACS/D	Family history of AD	Penn alcohol craving scale	Dominant	Logistic regression (GLM)	Likelihood ratio	categorical/binomial	odds ratio	94	72	166
35	ALC:FHA/SPB:M/GLM:PACS/R	Family history of AD	Penn alcohol craving scale	Recessive	Logistic regression (GLM)	Likelihood ratio	categorical/binomial	odds ratio	94	72	166
36	ALC:FHA/SPB:M/GLM:PACS/A	Family history of AD	Penn alcohol craving scale	Allelic	Logistic regression (GLM)	Likelihood ratio	categorical/binomial	odds ratio	94	72	166
37	ALC:FHA/SPB/GLM:SAI/CD	Family history of AD	Spielberger State Anxiety Inventory	Codominant	Logistic regression (GLM)	Likelihood ratio	categorical/binomial	elrs2	105	87	192
38	ALC:FHA/SPB/GLM:SAI/D	Family history of AD	Spielberger State Anxiety Inventory	Dominant	Logistic regression (GLM)	Likelihood ratio	categorical/binomial	odds ratio	105	87	192
39	ALC:FHA/SPB/GLM:SAI/R	Family history of AD	Spielberger State Anxiety Inventory	Recessive	Logistic regression (GLM)	Likelihood ratio	categorical/binomial	odds ratio	105	87	192
40	ALC:FHA/SPB/GLM:SAI/A	Family history of AD	Spielberger State Anxiety Inventory	Allelic	Logistic regression (GLM)	Likelihood ratio	categorical/binomial	odds ratio	105	87	192
41	ALC:FHA/SPB:F/GLM:SAI/CD	Family history of AD	Spielberger State Anxiety Inventory	Codominant	Logistic regression (GLM)	Likelihood ratio	categorical/binomial	elrs2	11	15	26
42	ALC:FHA/SPB:F/GLM:SAI/D	Family history of AD	Spielberger State Anxiety Inventory	Dominant	Logistic regression (GLM)	Likelihood ratio	categorical/binomial	odds ratio	11	15	26
43	ALC:FHA/SPB:F/GLM:SAI/R	Family history of AD	Spielberger State Anxiety Inventory	Recessive	Logistic regression (GLM)	Likelihood ratio	categorical/binomial	odds ratio	11	15	26
44	ALC:FHA/SPB:F/GLM:SAI/A	Family history of AD	Spielberger State Anxiety Inventory	Allelic	Logistic regression (GLM)	Likelihood ratio	categorical/binomial	odds ratio	11	15	26
45	ALC:FHA/SPB:M/GLM:SAI/CD	Family history of AD	Spielberger State Anxiety Inventory	Codominant	Logistic regression (GLM)	Likelihood ratio	categorical/binomial	elrs2	94	72	166
46	ALC:FHA/SPB:M/GLM:SAI/D	Family history of AD	Spielberger State Anxiety Inventory	Dominant	Logistic regression (GLM)	Likelihood ratio	categorical/binomial	odds ratio	94	72	166
47	ALC:FHA/SPB:M/GLM:SAI/R	Family history of AD	Spielberger State Anxiety Inventory	Recessive	Logistic regression (GLM)	Likelihood ratio	categorical/binomial	odds ratio	94	72	166
48	ALC:FHA/SPB:M/GLM:SAI/A	Family history of AD	Spielberger State Anxiety Inventory	Allelic	Logistic regression (GLM)	Likelihood ratio	categorical/binomial	odds ratio	94	72	166
49	ALC:FHA/SPB/GLM:TAI/CD	Family history of AD	Spielberger Trait Anxiety Inventory	Codominant	Logistic regression (GLM)	Likelihood ratio	categorical/binomial	elrs2	105	87	192
50	ALC:FHA/SPB/GLM:TAI/D	Family history of AD	Spielberger Trait Anxiety Inventory	Dominant	Logistic regression (GLM)	Likelihood ratio	categorical/binomial	odds ratio	105	87	192
51	ALC:FHA/SPB/GLM:TAI/R	Family history of AD	Spielberger Trait Anxiety Inventory	Recessive	Logistic regression (GLM)	Likelihood ratio	categorical/binomial	odds ratio	105	87	192
52	ALC:FHA/SPB/GLM:TAI/A	Family history of AD	Spielberger Trait Anxiety Inventory	Allelic	Logistic regression (GLM)	Likelihood ratio	categorical/binomial	odds ratio	105	87	192
53	ALC:FHA/SPB:F/GLM:TAI/CD	Family history of AD	Spielberger Trait Anxiety Inventory	Codominant	Logistic regression (GLM)	Likelihood ratio	categorical/binomial	elrs2	11	15	26
54	ALC:FHA/SPB:F/GLM:TAI/D	Family history of AD	Spielberger Trait Anxiety Inventory	Dominant	Logistic regression (GLM)	Likelihood ratio	categorical/binomial	odds ratio	11	15	26
55	ALC:FHA/SPB:F/GLM:TAI/R	Family history of AD	Spielberger Trait Anxiety Inventory	Recessive	Logistic regression (GLM)	Likelihood ratio	categorical/binomial	odds ratio	11	15	26
56	ALC:FHA/SPB:F/GLM:TAI/A	Family history of AD	Spielberger Trait Anxiety Inventory	Allelic	Logistic regression (GLM)	Likelihood ratio	categorical/binomial	odds ratio	11	15	26
57	ALC:FHA/SPB:M/GLM:TAI/CD	Family history of AD	Spielberger Trait Anxiety Inventory	Codominant	Logistic regression (GLM)	Likelihood ratio	categorical/binomial	elrs2	94	72	166
58	ALC:FHA/SPB:M/GLM:TAI/D	Family history of AD	Spielberger Trait Anxiety Inventory	Dominant	Logistic regression (GLM)	Likelihood ratio	categorical/binomial	odds ratio	94	72	166
59	ALC:FHA/SPB:M/GLM:TAI/R	Family history of AD	Spielberger Trait Anxiety Inventory	Recessive	Logistic regression (GLM)	Likelihood ratio	categorical/binomial	odds ratio	94	72	166
60	ALC:FHA/SPB:M/GLM:TAI/A	Family history of AD	Spielberger Trait Anxiety Inventory	Allelic	Logistic regression (GLM)	Likelihood ratio	categorical/binomial	odds ratio	94	72	166
61	ALC:FHA/SPB/GLM:VAS/CD	Family history of AD	Visual analog scale	Codominant	Logistic regression (GLM)	Likelihood ratio	categorical/binomial	elrs2	105	87	192
62	ALC:FHA/SPB/GLM:VAS/D	Family history of AD	Visual analog scale	Dominant	Logistic regression (GLM)	Likelihood ratio	categorical/binomial	odds ratio	105	87	192
63	ALC:FHA/SPB/GLM:VAS/R	Family history of AD	Visual analog scale	Recessive	Logistic regression (GLM)	Likelihood ratio	categorical/binomial	odds ratio	105	87	192
64	ALC:FHA/SPB/GLM:VAS/A	Family history of AD	Visual analog scale	Allelic	Logistic regression (GLM)	Likelihood ratio	categorical/binomial	odds ratio	105	87	192
65	ALC:FHA/SPB:F/GLM:VAS/CD	Family history of AD	Visual analog scale	Codominant	Logistic regression (GLM)	Likelihood ratio	categorical/binomial	elrs2	11	15	26
66	ALC:FHA/SPB:F/GLM:VAS/D	Family history of AD	Visual analog scale	Dominant	Logistic regression (GLM)	Likelihood ratio	categorical/binomial	odds ratio	11	15	26
67	ALC:FHA/SPB:F/GLM:VAS/R	Family history of AD	Visual analog scale	Recessive	Logistic regression (GLM)	Likelihood ratio	categorical/binomial	odds ratio	11	15	26
68	ALC:FHA/SPB:F/GLM:VAS/A	Family history of AD	Visual analog scale	Allelic	Logistic regression (GLM)	Likelihood ratio	categorical/binomial	odds ratio	11	15	26
69	ALC:FHA/SPB:M/GLM:VAS/CD	Family history of AD	Visual analog scale	Codominant	Logistic regression (GLM)	Likelihood ratio	categorical/binomial	elrs2	94	72	166
70	ALC:FHA/SPB:M/GLM:VAS/D	Family history of AD	Visual analog scale	Dominant	Logistic regression (GLM)	Likelihood ratio	categorical/binomial	odds ratio	94	72	166
71	ALC:FHA/SPB:M/GLM:VAS/R	Family history of AD	Visual analog scale	Recessive	Logistic regression (GLM)	Likelihood ratio	categorical/binomial	odds ratio	94	72	166
72	ALC:FHA/SPB:M/GLM:VAS/A	Family history of AD	Visual analog scale	Allelic	Logistic regression (GLM)	Likelihood ratio	categorical/binomial	odds ratio	94	72	166
73	ALC:FHA/SPB/CAT/CD	Family history of AD		Codominant	Contingency table	chi-square	categorical/multinomial	ez2-transformed correlation coefficient3	105	87	192
74	ALC:FHA/SPB/CAT/D	Family history of AD		Dominant	Contingency table	chi-square	categorical/multinomial	odds ratio	105	87	192
75	ALC:FHA/SPB/CAT/R	Family history of AD		Recessive	Contingency table	chi-square	categorical/multinomial	odds ratio	105	87	192
76	ALC:FHA/SPB/CAT/A	Family history of AD		Allelic	Contingency table	chi-square	categorical/multinomial	odds ratio	105	87	192
77	ALC:FHA/SPB:F/CAT/CD	Family history of AD		Codominant	Contingency table	chi-square	categorical/multinomial	ez2-transformed correlation coefficient3	11	15	26
78	ALC:FHA/SPB:F/CAT/D	Family history of AD		Dominant	Contingency table	chi-square	categorical/multinomial	odds ratio	11	15	26
79	ALC:FHA/SPB:F/CAT/R	Family history of AD		Recessive	Contingency table	chi-square	categorical/multinomial	odds ratio	11	15	26
80	ALC:FHA/SPB:F/CAT/A	Family history of AD		Allelic	Contingency table	chi-square	categorical/multinomial	odds ratio	11	15	26
81	ALC:FHA/SPB:M/CAT/CD	Family history of AD		Codominant	Contingency table	chi-square	categorical/multinomial	ez2-transformed correlation coefficient3	94	72	166
82	ALC:FHA/SPB:M/CAT/D	Family history of AD		Dominant	Contingency table	chi-square	categorical/multinomial	odds ratio	94	72	166
83	ALC:FHA/SPB:M/CAT/R	Family history of AD		Recessive	Contingency table	chi-square	categorical/multinomial	odds ratio	94	72	166
84	ALC:FHA/SPB:M/CAT/A	Family history of AD		Allelic	Contingency table	chi-square	categorical/multinomial	odds ratio	94	72	166
85	ALC:FHM/SPB/GLM:ATF*VERS/CD	Family history of mental disorders	Amount of alcohol consumed : self-reported or physician-rated	Codominant	Logistic regression (GLM)	Likelihood ratio	categorical/binomial	elrs2	105	87	192
86	ALC:FHM/SPB/GLM:ATF*VERS/D	Family history of mental disorders	Amount of alcohol consumed : self-reported or physician-rated	Dominant	Logistic regression (GLM)	Likelihood ratio	categorical/binomial	odds ratio	105	87	192
87	ALC:FHM/SPB/GLM:ATF*VERS/R	Family history of mental disorders	Amount of alcohol consumed : self-reported or physician-rated	Recessive	Logistic regression (GLM)	Likelihood ratio	categorical/binomial	odds ratio	105	87	192
88	ALC:FHM/SPB/GLM:ATF*VERS/A	Family history of mental disorders	Amount of alcohol consumed : self-reported or physician-rated	Allelic	Logistic regression (GLM)	Likelihood ratio	categorical/binomial	odds ratio	105	87	192
89	ALC:FHM/SPB:F/GLM:ATF*VERS/CD	Family history of mental disorders	Amount of alcohol consumed : self-reported or physician-rated	Codominant	Logistic regression (GLM)	Likelihood ratio	categorical/binomial	elrs2	11	15	26
90	ALC:FHM/SPB:F/GLM:ATF*VERS/D	Family history of mental disorders	Amount of alcohol consumed : self-reported or physician-rated	Dominant	Logistic regression (GLM)	Likelihood ratio	categorical/binomial	odds ratio	11	15	26
91	ALC:FHM/SPB:F/GLM:ATF*VERS/R	Family history of mental disorders	Amount of alcohol consumed : self-reported or physician-rated	Recessive	Logistic regression (GLM)	Likelihood ratio	categorical/binomial	odds ratio	11	15	26
92	ALC:FHM/SPB:F/GLM:ATF*VERS/A	Family history of mental disorders	Amount of alcohol consumed : self-reported or physician-rated	Allelic	Logistic regression (GLM)	Likelihood ratio	categorical/binomial	odds ratio	11	15	26
93	ALC:FHM/SPB:M/GLM:ATF*VERS/CD	Family history of mental disorders	Amount of alcohol consumed : self-reported or physician-rated	Codominant	Logistic regression (GLM)	Likelihood ratio	categorical/binomial	elrs2	94	72	166
94	ALC:FHM/SPB:M/GLM:ATF*VERS/D	Family history of mental disorders	Amount of alcohol consumed : self-reported or physician-rated	Dominant	Logistic regression (GLM)	Likelihood ratio	categorical/binomial	odds ratio	94	72	166
95	ALC:FHM/SPB:M/GLM:ATF*VERS/R	Family history of mental disorders	Amount of alcohol consumed : self-reported or physician-rated	Recessive	Logistic regression (GLM)	Likelihood ratio	categorical/binomial	odds ratio	94	72	166
96	ALC:FHM/SPB:M/GLM:ATF*VERS/A	Family history of mental disorders	Amount of alcohol consumed : self-reported or physician-rated	Allelic	Logistic regression (GLM)	Likelihood ratio	categorical/binomial	odds ratio	94	72	166
97	ALC:FHM/SPB/GLM:OCSD/CD	Family history of mental disorders	Obsessive-Compulsive Drinking Scale	Codominant	Logistic regression (GLM)	Likelihood ratio	categorical/binomial	elrs2	105	87	192
98	ALC:FHM/SPB/GLM:OCSD/D	Family history of mental disorders	Obsessive-Compulsive Drinking Scale	Dominant	Logistic regression (GLM)	Likelihood ratio	categorical/binomial	odds ratio	105	87	192
99	ALC:FHM/SPB/GLM:OCSD/R	Family history of mental disorders	Obsessive-Compulsive Drinking Scale	Recessive	Logistic regression (GLM)	Likelihood ratio	categorical/binomial	odds ratio	105	87	192
100	ALC:FHM/SPB/GLM:OCSD/A	Family history of mental disorders	Obsessive-Compulsive Drinking Scale	Allelic	Logistic regression (GLM)	Likelihood ratio	categorical/binomial	odds ratio	105	87	192
101	ALC:FHM/SPB:F/GLM:OCSD/CD	Family history of mental disorders	Obsessive-Compulsive Drinking Scale	Codominant	Logistic regression (GLM)	Likelihood ratio	categorical/binomial	elrs2	11	15	26
102	ALC:FHM/SPB:F/GLM:OCSD/D	Family history of mental disorders	Obsessive-Compulsive Drinking Scale	Dominant	Logistic regression (GLM)	Likelihood ratio	categorical/binomial	odds ratio	11	15	26
103	ALC:FHM/SPB:F/GLM:OCSD/R	Family history of mental disorders	Obsessive-Compulsive Drinking Scale	Recessive	Logistic regression (GLM)	Likelihood ratio	categorical/binomial	odds ratio	11	15	26
104	ALC:FHM/SPB:F/GLM:OCSD/A	Family history of mental disorders	Obsessive-Compulsive Drinking Scale	Allelic	Logistic regression (GLM)	Likelihood ratio	categorical/binomial	odds ratio	11	15	26
105	ALC:FHM/SPB:M/GLM:OCSD/CD	Family history of mental disorders	Obsessive-Compulsive Drinking Scale	Codominant	Logistic regression (GLM)	Likelihood ratio	categorical/binomial	elrs2	94	72	166
106	ALC:FHM/SPB:M/GLM:OCSD/D	Family history of mental disorders	Obsessive-Compulsive Drinking Scale	Dominant	Logistic regression (GLM)	Likelihood ratio	categorical/binomial	odds ratio	94	72	166
107	ALC:FHM/SPB:M/GLM:OCSD/R	Family history of mental disorders	Obsessive-Compulsive Drinking Scale	Recessive	Logistic regression (GLM)	Likelihood ratio	categorical/binomial	odds ratio	94	72	166
108	ALC:FHM/SPB:M/GLM:OCSD/A	Family history of mental disorders	Obsessive-Compulsive Drinking Scale	Allelic	Logistic regression (GLM)	Likelihood ratio	categorical/binomial	odds ratio	94	72	166
109	ALC:FHM/SPB/GLM:PACS/CD	Family history of mental disorders	Penn alcohol craving scale	Codominant	Logistic regression (GLM)	Likelihood ratio	categorical/binomial	elrs2	105	87	192
110	ALC:FHM/SPB/GLM:PACS/D	Family history of mental disorders	Penn alcohol craving scale	Dominant	Logistic regression (GLM)	Likelihood ratio	categorical/binomial	odds ratio	105	87	192
111	ALC:FHM/SPB/GLM:PACS/R	Family history of mental disorders	Penn alcohol craving scale	Recessive	Logistic regression (GLM)	Likelihood ratio	categorical/binomial	odds ratio	105	87	192
112	ALC:FHM/SPB/GLM:PACS/A	Family history of mental disorders	Penn alcohol craving scale	Allelic	Logistic regression (GLM)	Likelihood ratio	categorical/binomial	odds ratio	105	87	192
113	ALC:FHM/SPB:F/GLM:PACS/CD	Family history of mental disorders	Penn alcohol craving scale	Codominant	Logistic regression (GLM)	Likelihood ratio	categorical/binomial	elrs2	11	15	26
114	ALC:FHM/SPB:F/GLM:PACS/D	Family history of mental disorders	Penn alcohol craving scale	Dominant	Logistic regression (GLM)	Likelihood ratio	categorical/binomial	odds ratio	11	15	26
115	ALC:FHM/SPB:F/GLM:PACS/R	Family history of mental disorders	Penn alcohol craving scale	Recessive	Logistic regression (GLM)	Likelihood ratio	categorical/binomial	odds ratio	11	15	26
116	ALC:FHM/SPB:F/GLM:PACS/A	Family history of mental disorders	Penn alcohol craving scale	Allelic	Logistic regression (GLM)	Likelihood ratio	categorical/binomial	odds ratio	11	15	26
117	ALC:FHM/SPB:M/GLM:PACS/CD	Family history of mental disorders	Penn alcohol craving scale	Codominant	Logistic regression (GLM)	Likelihood ratio	categorical/binomial	elrs2	94	72	166
118	ALC:FHM/SPB:M/GLM:PACS/D	Family history of mental disorders	Penn alcohol craving scale	Dominant	Logistic regression (GLM)	Likelihood ratio	categorical/binomial	odds ratio	94	72	166
119	ALC:FHM/SPB:M/GLM:PACS/R	Family history of mental disorders	Penn alcohol craving scale	Recessive	Logistic regression (GLM)	Likelihood ratio	categorical/binomial	odds ratio	94	72	166
120	ALC:FHM/SPB:M/GLM:PACS/A	Family history of mental disorders	Penn alcohol craving scale	Allelic	Logistic regression (GLM)	Likelihood ratio	categorical/binomial	odds ratio	94	72	166
121	ALC:FHM/SPB/GLM:SAI/CD	Family history of mental disorders	Spielberger State Anxiety Inventory	Codominant	Logistic regression (GLM)	Likelihood ratio	categorical/binomial	elrs2	105	87	192
122	ALC:FHM/SPB/GLM:SAI/D	Family history of mental disorders	Spielberger State Anxiety Inventory	Dominant	Logistic regression (GLM)	Likelihood ratio	categorical/binomial	odds ratio	105	87	192
123	ALC:FHM/SPB/GLM:SAI/R	Family history of mental disorders	Spielberger State Anxiety Inventory	Recessive	Logistic regression (GLM)	Likelihood ratio	categorical/binomial	odds ratio	105	87	192
124	ALC:FHM/SPB/GLM:SAI/A	Family history of mental disorders	Spielberger State Anxiety Inventory	Allelic	Logistic regression (GLM)	Likelihood ratio	categorical/binomial	odds ratio	105	87	192
125	ALC:FHM/SPB:F/GLM:SAI/CD	Family history of mental disorders	Spielberger State Anxiety Inventory	Codominant	Logistic regression (GLM)	Likelihood ratio	categorical/binomial	elrs2	11	15	26
126	ALC:FHM/SPB:F/GLM:SAI/D	Family history of mental disorders	Spielberger State Anxiety Inventory	Dominant	Logistic regression (GLM)	Likelihood ratio	categorical/binomial	odds ratio	11	15	26
127	ALC:FHM/SPB:F/GLM:SAI/R	Family history of mental disorders	Spielberger State Anxiety Inventory	Recessive	Logistic regression (GLM)	Likelihood ratio	categorical/binomial	odds ratio	11	15	26
128	ALC:FHM/SPB:F/GLM:SAI/A	Family history of mental disorders	Spielberger State Anxiety Inventory	Allelic	Logistic regression (GLM)	Likelihood ratio	categorical/binomial	odds ratio	11	15	26
129	ALC:FHM/SPB:M/GLM:SAI/CD	Family history of mental disorders	Spielberger State Anxiety Inventory	Codominant	Logistic regression (GLM)	Likelihood ratio	categorical/binomial	elrs2	94	72	166
130	ALC:FHM/SPB:M/GLM:SAI/D	Family history of mental disorders	Spielberger State Anxiety Inventory	Dominant	Logistic regression (GLM)	Likelihood ratio	categorical/binomial	odds ratio	94	72	166
131	ALC:FHM/SPB:M/GLM:SAI/R	Family history of mental disorders	Spielberger State Anxiety Inventory	Recessive	Logistic regression (GLM)	Likelihood ratio	categorical/binomial	odds ratio	94	72	166
132	ALC:FHM/SPB:M/GLM:SAI/A	Family history of mental disorders	Spielberger State Anxiety Inventory	Allelic	Logistic regression (GLM)	Likelihood ratio	categorical/binomial	odds ratio	94	72	166
133	ALC:FHM/SPB/GLM:TAI/CD	Family history of mental disorders	Spielberger Trait Anxiety Inventory	Codominant	Logistic regression (GLM)	Likelihood ratio	categorical/binomial	elrs2	105	87	192
134	ALC:FHM/SPB/GLM:TAI/D	Family history of mental disorders	Spielberger Trait Anxiety Inventory	Dominant	Logistic regression (GLM)	Likelihood ratio	categorical/binomial	odds ratio	105	87	192
135	ALC:FHM/SPB/GLM:TAI/R	Family history of mental disorders	Spielberger Trait Anxiety Inventory	Recessive	Logistic regression (GLM)	Likelihood ratio	categorical/binomial	odds ratio	105	87	192
136	ALC:FHM/SPB/GLM:TAI/A	Family history of mental disorders	Spielberger Trait Anxiety Inventory	Allelic	Logistic regression (GLM)	Likelihood ratio	categorical/binomial	odds ratio	105	87	192
137	ALC:FHM/SPB:F/GLM:TAI/CD	Family history of mental disorders	Spielberger Trait Anxiety Inventory	Codominant	Logistic regression (GLM)	Likelihood ratio	categorical/binomial	elrs2	11	15	26
138	ALC:FHM/SPB:F/GLM:TAI/D	Family history of mental disorders	Spielberger Trait Anxiety Inventory	Dominant	Logistic regression (GLM)	Likelihood ratio	categorical/binomial	odds ratio	11	15	26
139	ALC:FHM/SPB:F/GLM:TAI/R	Family history of mental disorders	Spielberger Trait Anxiety Inventory	Recessive	Logistic regression (GLM)	Likelihood ratio	categorical/binomial	odds ratio	11	15	26
140	ALC:FHM/SPB:F/GLM:TAI/A	Family history of mental disorders	Spielberger Trait Anxiety Inventory	Allelic	Logistic regression (GLM)	Likelihood ratio	categorical/binomial	odds ratio	11	15	26
141	ALC:FHM/SPB:M/GLM:TAI/CD	Family history of mental disorders	Spielberger Trait Anxiety Inventory	Codominant	Logistic regression (GLM)	Likelihood ratio	categorical/binomial	elrs2	94	72	166
142	ALC:FHM/SPB:M/GLM:TAI/D	Family history of mental disorders	Spielberger Trait Anxiety Inventory	Dominant	Logistic regression (GLM)	Likelihood ratio	categorical/binomial	odds ratio	94	72	166
143	ALC:FHM/SPB:M/GLM:TAI/R	Family history of mental disorders	Spielberger Trait Anxiety Inventory	Recessive	Logistic regression (GLM)	Likelihood ratio	categorical/binomial	odds ratio	94	72	166
144	ALC:FHM/SPB:M/GLM:TAI/A	Family history of mental disorders	Spielberger Trait Anxiety Inventory	Allelic	Logistic regression (GLM)	Likelihood ratio	categorical/binomial	odds ratio	94	72	166
145	ALC:FHM/SPB/GLM:VAS/CD	Family history of mental disorders	Visual analog scale	Codominant	Logistic regression (GLM)	Likelihood ratio	categorical/binomial	elrs2	105	87	192
146	ALC:FHM/SPB/GLM:VAS/D	Family history of mental disorders	Visual analog scale	Dominant	Logistic regression (GLM)	Likelihood ratio	categorical/binomial	odds ratio	105	87	192
147	ALC:FHM/SPB/GLM:VAS/R	Family history of mental disorders	Visual analog scale	Recessive	Logistic regression (GLM)	Likelihood ratio	categorical/binomial	odds ratio	105	87	192
148	ALC:FHM/SPB/GLM:VAS/A	Family history of mental disorders	Visual analog scale	Allelic	Logistic regression (GLM)	Likelihood ratio	categorical/binomial	odds ratio	105	87	192
149	ALC:FHM/SPB:F/GLM:VAS/CD	Family history of mental disorders	Visual analog scale	Codominant	Logistic regression (GLM)	Likelihood ratio	categorical/binomial	elrs2	11	15	26
150	ALC:FHM/SPB:F/GLM:VAS/D	Family history of mental disorders	Visual analog scale	Dominant	Logistic regression (GLM)	Likelihood ratio	categorical/binomial	odds ratio	11	15	26
151	ALC:FHM/SPB:F/GLM:VAS/R	Family history of mental disorders	Visual analog scale	Recessive	Logistic regression (GLM)	Likelihood ratio	categorical/binomial	odds ratio	11	15	26
152	ALC:FHM/SPB:F/GLM:VAS/A	Family history of mental disorders	Visual analog scale	Allelic	Logistic regression (GLM)	Likelihood ratio	categorical/binomial	odds ratio	11	15	26
153	ALC:FHM/SPB:M/GLM:VAS/CD	Family history of mental disorders	Visual analog scale	Codominant	Logistic regression (GLM)	Likelihood ratio	categorical/binomial	elrs2	94	72	166
154	ALC:FHM/SPB:M/GLM:VAS/D	Family history of mental disorders	Visual analog scale	Dominant	Logistic regression (GLM)	Likelihood ratio	categorical/binomial	odds ratio	94	72	166
155	ALC:FHM/SPB:M/GLM:VAS/R	Family history of mental disorders	Visual analog scale	Recessive	Logistic regression (GLM)	Likelihood ratio	categorical/binomial	odds ratio	94	72	166
156	ALC:FHM/SPB:M/GLM:VAS/A	Family history of mental disorders	Visual analog scale	Allelic	Logistic regression (GLM)	Likelihood ratio	categorical/binomial	odds ratio	94	72	166
157	ALC:FHM/SPB/CAT/CD	Family history of mental disorders		Codominant	Contingency table	chi-square	categorical/multinomial	ez2-transformed correlation coefficient3	105	87	192
158	ALC:FHM/SPB/CAT/D	Family history of mental disorders		Dominant	Contingency table	chi-square	categorical/multinomial	odds ratio	105	87	192
159	ALC:FHM/SPB/CAT/R	Family history of mental disorders		Recessive	Contingency table	chi-square	categorical/multinomial	odds ratio	105	87	192
160	ALC:FHM/SPB/CAT/A	Family history of mental disorders		Allelic	Contingency table	chi-square	categorical/multinomial	odds ratio	105	87	192
161	ALC:FHM/SPB:F/CAT/CD	Family history of mental disorders		Codominant	Contingency table	chi-square	categorical/multinomial	ez2-transformed correlation coefficient3	11	15	26
162	ALC:FHM/SPB:F/CAT/D	Family history of mental disorders		Dominant	Contingency table	chi-square	categorical/multinomial	odds ratio	11	15	26
163	ALC:FHM/SPB:F/CAT/R	Family history of mental disorders		Recessive	Contingency table	chi-square	categorical/multinomial	odds ratio	11	15	26
164	ALC:FHM/SPB:F/CAT/A	Family history of mental disorders		Allelic	Contingency table	chi-square	categorical/multinomial	odds ratio	11	15	26
165	ALC:FHM/SPB:M/CAT/CD	Family history of mental disorders		Codominant	Contingency table	chi-square	categorical/multinomial	ez2-transformed correlation coefficient3	94	72	166
166	ALC:FHM/SPB:M/CAT/D	Family history of mental disorders		Dominant	Contingency table	chi-square	categorical/multinomial	odds ratio	94	72	166
167	ALC:FHM/SPB:M/CAT/R	Family history of mental disorders		Recessive	Contingency table	chi-square	categorical/multinomial	odds ratio	94	72	166
168	ALC:FHM/SPB:M/CAT/A	Family history of mental disorders		Allelic	Contingency table	chi-square	categorical/multinomial	odds ratio	94	72	166
1QAS - quantative association statistic
2Exponentiated logistic regression slope
3We designate (1+ρ)/(1-ρ) as ez2-transformation of correlation coefficient
