# Supplementary material for: A Genome-Wide Association Study Reveals New Genes in a Molecular Network Associated With Alcohol Dependence and Related Clinical Measures
Source: Preprints.org preprint supplement (doi:10.20944/preprints202208.0178.v1), 2022-08-09
Supplement: Supplementary file 5 [file Table S3A-G.xlsx]

## Sheet: Table S3A
Table S3A. Signal localization: top adjusted p-values (< 10-5) and joint regions (localization radius 10 SNPs)
Window	Count	Test	Chr	Left position	Position (hg38)	Right position	Density	Naive p-value	Adjusted p-value	Min. adjusted p-value	Region	Reglw_pos	Regup_pos
nrow:10	21	INC:F:Dominant	6	46717549	46799908	46879764	1.46662	9.34437e-13	3.25034e-07	3.25034e-07	1	46714342	46975651
nrow:10	21	INC:F:Allelic	6	46717549	46799908	46879764	1.41089	6.47091e-12	1.38973e-06	3.25034e-07	1	46714342	46975651
nrow:10	21	INC:F:Codominant	6	46717549	46799908	46879764	1.32879	1.05917e-10	2.61225e-06	3.25034e-07	1	46714342	46975651
nrow:10	21	INC:F:Dominant	6	46815661	46903448	46957248	1.79584	6.12576e-18	4.50278e-07	4.50278e-07	1	46714342	46975651
nrow:10	21	INC:F:Allelic	6	46815661	46903448	46957248	1.63966	1.9436e-15	9.31669e-06	4.50278e-07	1	46714342	46975651
nrow:10	21	INC:F:Dominant	6	46716485	46789539	46874069	1.45993	1.18088e-12	4.50507e-07	4.50507e-07	1	46714342	46975651
nrow:10	21	INC:F:Allelic	6	46716485	46789539	46874069	1.43768	2.56207e-12	1.83226e-06	4.50507e-07	1	46714342	46975651
nrow:10	21	INC:F:Codominant	6	46716485	46789539	46874069	1.286	4.41888e-10	4.95403e-06	4.50507e-07	1	46714342	46975651
nrow:10	21	INC:F:Dominant	6	46789539	46874069	46944011	1.61222	5.2572e-15	4.65944e-07	4.65944e-07	1	46714342	46975651
nrow:10	21	INC:F:Dominant	6	46799908	46879764	46946442	1.66079	9.00277e-16	5.3617e-07	5.3617e-07	1	46714342	46975651
nrow:10	21	INC:F:Allelic	6	46799908	46879764	46946442	1.51268	1.84919e-13	9.56214e-06	5.3617e-07	1	46714342	46975651
nrow:10	21	INC:F:Codominant	6	46799908	46879764	46946442	1.48434	5.02193e-13	9.84868e-06	5.3617e-07	1	46714342	46975651
nrow:10	21	INC:F:Dominant	6	46801891	46895223	46950281	1.66403	7.99974e-16	1.07882e-06	1.07882e-06	1	46714342	46975651
nrow:10	21	INC:F:Dominant	6	46746068	46815661	46903448	1.4282	3.55799e-12	1.50341e-06	1.50341e-06	1	46714342	46975651
nrow:10	21	INC:F:Allelic	6	46746068	46815661	46903448	1.36732	2.87617e-11	3.64032e-06	1.50341e-06	1	46714342	46975651
nrow:10	21	INC:F:Allelic	6	46726179	46801891	46895223	1.41971	4.77248e-12	1.60945e-06	1.60945e-06	1	46714342	46975651
nrow:10	21	INC:F:Dominant	6	46726179	46801891	46895223	1.47602	6.72379e-13	1.62002e-06	1.60945e-06	1	46714342	46975651
nrow:10	21	INC:F:Codominant	6	46726179	46801891	46895223	1.34392	6.35897e-11	6.01193e-06	1.60945e-06	1	46714342	46975651
nrow:10	21	INC:F:Dominant	6	46767421	46872709	46927673	1.45002	1.66798e-12	1.93485e-06	1.93485e-06	1	46714342	46975651
nrow:10	21	INC:F:Dominant	6	46823879	46908506	46970827	1.77271	1.45188e-17	2.45893e-06	2.45893e-06	1	46714342	46975651
nrow:10	21	INC:F:Dominant	6	46747924	46821990	46906000	1.33527	8.5144e-11	2.47796e-06	2.47796e-06	1	46714342	46975651
nrow:10	21	INC:F:Allelic	6	46747924	46821990	46906000	1.26699	8.28118e-10	6.56257e-06	2.47796e-06	1	46714342	46975651
nrow:10	21	INC:F:Dominant	6	46821990	46906000	46967144	1.795	6.31991e-18	2.66135e-06	2.66135e-06	1	46714342	46975651
nrow:10	21	INC:F:Dominant	6	46833482	46910709	46971734	1.78441	9.38655e-18	4.77784e-06	4.77784e-06	1	46714342	46975651
nrow:10	21	INC:F:Dominant	6	46765366	46867760	46921840	1.43901	2.4465e-12	5.06981e-06	5.06981e-06	1	46714342	46975651
nrow:10	21	INC:F:Dominant	6	46765332	46861891	46916551	1.41688	5.26159e-12	5.66981e-06	5.66981e-06	1	46714342	46975651
nrow:10	21	INC:F:Dominant	6	46760530	46850194	46910709	1.32021	1.41271e-10	5.94256e-06	5.94256e-06	1	46714342	46975651
nrow:10	21	INC:F:Dominant	6	46861891	46916551	46975159	1.77566	1.30079e-17	6.36449e-06	6.36449e-06	1	46714342	46975651
nrow:10	21	INC:F:Dominant	6	46864336	46921840	46975651	1.77617	1.2763e-17	6.74996e-06	6.74996e-06	1	46714342	46975651
nrow:10	21	INC:F:Dominant	6	46714342	46767421	46872709	1.20978	5.34086e-09	9.89485e-06	9.89485e-06	1	46714342	46975651
nrow:10	21	INC:M:Dominant	11	83805638	83849843	83867661	1.35617	4.20066e-11	1.12945e-06	1.12945e-06	2	83787756	83875887
nrow:10	21	INC:M:Allelic	11	83805638	83849843	83867661	1.46794	8.92322e-13	1.74059e-06	1.12945e-06	2	83787756	83875887
nrow:10	21	INC:M:Codominant	11	83805638	83849843	83867661	1.2936	3.43398e-10	3.75177e-06	1.12945e-06	2	83787756	83875887
nrow:10	21	INC:M:Allelic	11	83815083	83849998	83868148	1.46528	9.79583e-13	1.28578e-06	1.28578e-06	2	83787756	83875887
nrow:10	21	INC:M:Dominant	11	83815083	83849998	83868148	1.34793	5.55406e-11	1.35824e-06	1.28578e-06	2	83787756	83875887
nrow:10	21	INC:M:Codominant	11	83815083	83849998	83868148	1.29094	3.75089e-10	2.52058e-06	1.28578e-06	2	83787756	83875887
nrow:10	21	INC:M:Allelic	11	83792361	83847901	83865969	1.46392	1.02707e-12	1.67437e-06	1.67437e-06	2	83787756	83875887
nrow:10	21	INC:M:Dominant	11	83792361	83847901	83865969	1.32725	1.11534e-10	2.73007e-06	1.67437e-06	2	83787756	83875887
nrow:10	21	INC:M:Allelic	11	83827480	83851253	83868864	1.4566	1.32632e-12	1.81487e-06	1.81487e-06	2	83787756	83875887
nrow:10	21	INC:M:Dominant	11	83827480	83851253	83868864	1.33874	7.57522e-11	2.46646e-06	1.81487e-06	2	83787756	83875887
nrow:10	21	INC:M:Codominant	11	83827480	83851253	83868864	1.27199	7.02305e-10	6.43615e-06	1.81487e-06	2	83787756	83875887
nrow:10	21	INC:M:Codominant	11	83787756	83847372	83864684	1.28257	4.95181e-10	3.06182e-06	3.06182e-06	2	83787756	83875887
nrow:10	21	INC:M:Allelic	11	83787756	83847372	83864684	1.41353	5.90756e-12	3.67682e-06	3.06182e-06	2	83787756	83875887
nrow:10	21	INC:M:Dominant	11	83787756	83847372	83864684	1.28117	5.18609e-10	3.98995e-06	3.06182e-06	2	83787756	83875887
nrow:10	21	INC:M:Allelic	11	83832704	83855072	83875887	1.31074	1.9396e-10	7.49749e-06	7.49749e-06	2	83787756	83875887
nrow:10	21	INC:M:Allelic	11	83830100	83852393	83870197	1.32728	1.11416e-10	8.45498e-06	8.45498e-06	2	83787756	83875887
nrow:10	21	INC:Dominant	1	89311458	89433366	89546534	1.39384	1.1625e-11	1.69323e-06	1.69323e-06	3	89202489	89546534
nrow:10	21	INC:Allelic	1	89311458	89433366	89546534	1.32508	1.1996e-10	6.67744e-06	1.69323e-06	3	89202489	89546534
nrow:10	21	INC:Dominant	1	89264230	89392631	89532389	1.3702	2.60775e-11	1.73606e-06	1.73606e-06	3	89202489	89546534
nrow:10	21	INC:Allelic	1	89264230	89392631	89532389	1.28533	4.51928e-10	9.92856e-06	1.73606e-06	3	89202489	89546534
nrow:10	21	INC:Dominant	1	89310550	89427579	89536707	1.36617	2.99139e-11	1.90614e-06	1.90614e-06	3	89202489	89546534
nrow:10	21	INC:Dominant	1	89255766	89381852	89514592	1.21948	3.90452e-09	3.76091e-06	3.76091e-06	3	89202489	89546534
nrow:10	21	INC:Dominant	1	89263700	89384015	89517160	1.26545	8.71317e-10	4.08601e-06	4.08601e-06	3	89202489	89546534
nrow:10	21	INC:Dominant	1	89248128	89370637	89502811	1.20238	6.77697e-09	5.21099e-06	5.21099e-06	3	89202489	89546534
nrow:10	21	INC:Dominant	1	89207513	89369650	89456034	1.14953	3.63307e-08	7.86558e-06	7.86558e-06	3	89202489	89546534
nrow:10	21	INC:Dominant	1	89202489	89356533	89454519	1.16268	2.40117e-08	8.11963e-06	8.11963e-06	3	89202489	89546534

## Sheet: Table S3B
Table S3B. Signal localization: top adjusted p-values (< 10-5) and joint regions (localization radius 20 SNPs)
Window	Count	Test	Chr	Left position	Position (hg38)	Right position	Density	Naive p-value	Adjusted p-value	Min. adjusted p-value	Region	Reglw_pos	Regup_pos
nrow:20	41	INC:F:Dominant	6	46716485	46874069	46986801	1.29485	4.54893e-18	2.73631e-07	2.73631e-07	1	46638591	47018219
nrow:20	41	INC:F:Allelic	6	46716485	46874069	46986801	1.2319	2.41841e-16	4.91487e-06	2.73631e-07	1	46638591	47018219
nrow:20	41	INC:F:Dominant	6	46717549	46879764	46987101	1.279	1.24802e-17	3.97601e-07	3.97601e-07	1	46638591	47018219
nrow:20	41	INC:F:Allelic	6	46717549	46879764	46987101	1.21358	7.54737e-16	4.51327e-06	3.97601e-07	1	46638591	47018219
nrow:20	41	INC:F:Dominant	6	46714342	46872709	46983928	1.29029	6.08418e-18	4.61293e-07	4.61293e-07	1	46638591	47018219
nrow:20	41	INC:F:Dominant	6	46726179	46895223	46989183	1.28189	1.03911e-17	4.84403e-07	4.84403e-07	1	46638591	47018219
nrow:20	41	INC:F:Allelic	6	46726179	46895223	46989183	1.21875	5.48e-16	8.59693e-06	4.84403e-07	1	46638591	47018219
nrow:20	41	INC:F:Dominant	6	46711566	46867760	46975651	1.28256	9.95892e-18	6.31393e-07	6.31393e-07	1	46638591	47018219
nrow:20	41	INC:F:Allelic	6	46711566	46867760	46975651	1.21771	5.84326e-16	8.50976e-06	6.31393e-07	1	46638591	47018219
nrow:20	41	INC:F:Dominant	6	46705206	46861891	46975159	1.30072	3.12559e-18	6.88693e-07	6.88693e-07	1	46638591	47018219
nrow:20	41	INC:F:Dominant	6	46703085	46850194	46971734	1.31522	1.23225e-18	7.3815e-07	7.3815e-07	1	46638591	47018219
nrow:20	41	INC:F:Allelic	6	46703085	46850194	46971734	1.22465	3.79797e-16	8.59029e-06	7.3815e-07	1	46638591	47018219
nrow:20	41	INC:F:Dominant	6	46746068	46903448	46994049	1.25882	4.47412e-17	8.47704e-07	8.47704e-07	1	46638591	47018219
nrow:20	41	INC:F:Allelic	6	46746068	46903448	46994049	1.19598	2.23314e-15	8.81779e-06	8.47704e-07	1	46638591	47018219
nrow:20	41	INC:F:Dominant	6	46657898	46815661	46957248	1.32662	5.90915e-19	1.0489e-06	1.0489e-06	1	46638591	47018219
nrow:20	41	INC:F:Allelic	6	46657898	46815661	46957248	1.22996	2.73045e-16	7.9222e-06	1.0489e-06	1	46638591	47018219
nrow:20	41	INC:F:Dominant	6	46677138	46821990	46967144	1.31423	1.31373e-18	1.16504e-06	1.16504e-06	1	46638591	47018219
nrow:20	41	INC:F:Dominant	6	46688820	46823879	46970827	1.31736	1.07361e-18	1.39352e-06	1.39352e-06	1	46638591	47018219
nrow:20	41	INC:F:Dominant	6	46747924	46906000	46998537	1.22759	3.16474e-16	1.90187e-06	1.90187e-06	1	46638591	47018219
nrow:20	41	INC:F:Dominant	6	46765366	46921840	47018219	1.25163	7.03446e-17	3.92963e-06	3.92963e-06	1	46638591	47018219
nrow:20	41	INC:F:Dominant	6	46760530	46910709	47010047	1.21808	5.71053e-16	4.9122e-06	4.9122e-06	1	46638591	47018219
nrow:20	41	INC:F:Dominant	6	46642168	46799908	46946442	1.26261	3.52446e-17	6.08436e-06	6.08436e-06	1	46638591	47018219
nrow:20	41	INC:F:Dominant	6	46655961	46801891	46950281	1.26598	2.84811e-17	6.5639e-06	6.5639e-06	1	46638591	47018219
nrow:20	41	INC:F:Dominant	6	46749717	46908506	47009076	1.18967	3.28761e-15	8.60464e-06	8.60464e-06	1	46638591	47018219
nrow:20	41	INC:F:Dominant	6	46765332	46916551	47012622	1.24053	1.41121e-16	9.76859e-06	9.76859e-06	1	46638591	47018219
nrow:20	41	INC:F:Dominant	6	46638591	46789539	46944011	1.21043	9.17111e-16	9.79395e-06	9.79395e-06	1	46638591	47018219
nrow:20	41	INC:Dominant	1	89310550	89536707	89679693	1.06422	5.65643e-12	1.90247e-06	1.90247e-06	2	89264230	89693160
nrow:20	41	INC:Dominant	1	89311458	89546534	89693160	1.04467	1.72651e-11	3.11309e-06	3.11309e-06	2	89264230	89693160
nrow:20	41	INC:Dominant	1	89264230	89532389	89674627	1.05486	9.66962e-12	3.37152e-06	3.37152e-06	2	89264230	89693160
nrow:20	41	INC:M:Dominant	8	26472000	26614521	26727632	1.15256	3.12884e-14	8.0265e-06	8.0265e-06	3	26470206	26727632
nrow:20	41	INC:M:Dominant	8	26470206	26614448	26726072	1.15285	3.0747e-14	9.70945e-06	9.70945e-06	3	26470206	26727632

## Sheet: Table S3C
Table S3C. Signal localization: top adjusted p-values (< 10-5) and joint regions (localization radius 35 SNPs)
Window	Count	Test	Chr	Left position	Position (hg38)	Right position	Density	Naive p-value	Adjusted p-value	Min. adjusted p-value	Region	Reglw_pos	Regup_pos
nrow:35	71	INC:F:Dominant	6	46657898	46921840	47152121	1.03223	5.89244e-18	4.71217e-06	4.71217e-06	1	46558701	47169999
nrow:35	71	INC:F:Dominant	6	46688820	46944011	47157536	1.02428	1.26588e-17	5.05727e-06	5.05727e-06	1	46558701	47169999
nrow:35	71	INC:F:Dominant	6	46575096	46872709	47114294	1.04057	2.63504e-18	5.063e-06	5.063e-06	1	46558701	47169999
nrow:35	71	INC:F:Dominant	6	46677138	46927673	47153539	1.03039	7.03832e-18	5.76063e-06	5.76063e-06	1	46558701	47169999
nrow:35	71	INC:F:Dominant	6	46571515	46850194	47060431	0.998748	1.43018e-16	7.41238e-06	7.41238e-06	1	46558701	47169999
nrow:35	71	INC:F:Dominant	6	46655961	46916551	47146673	1.03798	3.38486e-18	8.34752e-06	8.34752e-06	1	46558701	47169999
nrow:35	71	INC:F:Dominant	6	46642168	46910709	47141887	1.02972	7.50557e-18	8.45712e-06	8.45712e-06	1	46558701	47169999
nrow:35	71	INC:F:Dominant	6	46558701	46823879	47049504	0.983116	6.17564e-16	8.82695e-06	8.82695e-06	1	46558701	47169999
nrow:35	71	INC:F:Dominant	6	46571998	46861891	47083602	1.03087	6.72293e-18	9.10464e-06	9.10464e-06	1	46558701	47169999
nrow:35	71	INC:F:Dominant	6	46705206	46950281	47169999	0.996431	1.77836e-16	9.27362e-06	9.27362e-06	1	46558701	47169999
nrow:35	71	INC:F:Allelic	1	247089534	247344606	247449260	1.00239	1.01447e-16	9.83409e-06	9.83409e-06	2	247089534	247449260

## Sheet: Table S3D
Table S3D. Signal localization: top adjusted p-values (< 10-5) and joint regions (localization radius 50 SNPs)
Window	Count	Test	Chr	Left position	Position (hg38)	Right position	Density	Naive p-value	Adjusted p-value	Min. adjusted p-value	Region	Reglw_pos	Regup_pos
nrow:50	101	INC:F:Allelic	1	246830110	247204036	247444865	1.02559	2.69214e-24	4.84732e-06	4.84732e-06	1	246797944	247451594
nrow:50	101	INC:F:Allelic	1	246874715	247225848	247451594	1.02406	3.31532e-24	5.14388e-06	5.14388e-06	1	246797944	247451594
nrow:50	101	INC:F:Allelic	1	246842167	247214973	247449260	1.03037	1.40599e-24	6.64387e-06	6.64387e-06	1	246797944	247451594
nrow:50	101	INC:F:Allelic	1	246829540	247203133	247442297	1.02562	2.68184e-24	6.82703e-06	6.82703e-06	1	246797944	247451594
nrow:50	101	INC:F:Allelic	1	246797944	247159958	247432548	0.978998	1.35418e-21	7.45474e-06	7.45474e-06	1	246797944	247451594
nrow:50	101	INC:F:Allelic	1	246821478	247189319	247440603	1.0086	2.66841e-23	8.12128e-06	8.12128e-06	1	246797944	247451594
nrow:50	101	INC:F:Allelic	1	246817182	247185284	247439666	1.01007	2.19081e-23	9.23651e-06	9.23651e-06	1	246797944	247451594
nrow:50	101	INC:F:Allelic	1	246808303	247177454	247436999	0.987634	4.34541e-22	9.87502e-06	9.87502e-06	1	246797944	247451594
nrow:50	101	INC:F:Dominant	6	46746068	47098818	47453452	0.90098	2.71941e-17	8.32466e-06	8.32466e-06	2	46746068	47453452

## Sheet: Table S3E
Table S3E. Signal localization: top adjusted p-values (< 10-5) and joint regions (localization radius 100 SNPs)
Window	Count	Test	Chr	Left position	Position (hg38)	Right position	Density	Naive p-value	Adjusted p-value	Min. adjusted p-value	Region	Reglw_pos	Regup_pos
nrow:100	201	INC:F:Allelic	1	246553826	247294468	247853076	0.803906	9.40789e-23	1.18285e-06	1.18285e-06	1	246049968	247896154
nrow:100	201	INC:F:Allelic	1	246624975	247326336	247876149	0.792232	1.13938e-21	1.6321e-06	1.6321e-06	1	246049968	247896154
nrow:100	201	INC:F:Allelic	1	246573018	247299399	247862930	0.801676	1.52e-22	1.71142e-06	1.71142e-06	1	246049968	247896154
nrow:100	201	INC:F:Allelic	1	246591822	247313935	247868866	0.796329	4.77128e-22	1.81259e-06	1.81259e-06	1	246049968	247896154
nrow:100	201	INC:F:Allelic	1	246553302	247287263	247848601	0.800813	1.82898e-22	1.86072e-06	1.86072e-06	1	246049968	247896154
nrow:100	201	INC:F:Allelic	1	246533884	247249782	247828307	0.797015	4.12228e-22	1.94384e-06	1.94384e-06	1	246049968	247896154
nrow:100	201	INC:F:Allelic	1	246570568	247295401	247859436	0.802622	1.24021e-22	2.03915e-06	2.03915e-06	1	246049968	247896154
nrow:100	201	INC:F:Allelic	1	246467537	247214973	247777890	0.783429	7.26676e-21	2.1046e-06	2.1046e-06	1	246049968	247896154
nrow:100	201	INC:F:Allelic	1	246531461	247238343	247822827	0.79279	1.01241e-21	2.25398e-06	2.25398e-06	1	246049968	247896154
nrow:100	201	INC:F:Allelic	1	246531178	247236957	247789598	0.786533	3.79164e-21	2.28488e-06	2.28488e-06	1	246049968	247896154
nrow:100	201	INC:F:Allelic	1	246617317	247323226	247875992	0.795128	6.16191e-22	2.57961e-06	2.57961e-06	1	246049968	247896154
nrow:100	201	INC:F:Allelic	1	246455305	247203133	247762071	0.782282	9.23394e-21	2.63026e-06	2.63026e-06	1	246049968	247896154
nrow:100	201	INC:F:Allelic	1	246552345	247257119	247834311	0.801072	1.73027e-22	2.70169e-06	2.70169e-06	1	246049968	247896154
nrow:100	201	INC:F:Allelic	1	246573784	247312230	247863850	0.796608	4.49553e-22	2.71079e-06	2.71079e-06	1	246049968	247896154
nrow:100	201	INC:F:Allelic	1	246371150	247142571	247680437	0.76512	3.1626e-19	2.92277e-06	2.92277e-06	1	246049968	247896154
nrow:100	201	INC:F:Allelic	1	246538517	247256362	247829886	0.796917	4.2093e-22	2.95763e-06	2.95763e-06	1	246049968	247896154
nrow:100	201	INC:F:Allelic	1	246396550	247151993	247711249	0.770714	1.01023e-19	3.01208e-06	3.01208e-06	1	246049968	247896154
nrow:100	201	INC:F:Allelic	1	246128149	246945994	247472713	0.77621	3.25945e-20	3.16031e-06	3.16031e-06	1	246049968	247896154
nrow:100	201	INC:F:Allelic	1	246460285	247204036	247770197	0.782827	8.23981e-21	3.24073e-06	3.24073e-06	1	246049968	247896154
nrow:100	201	INC:F:Allelic	1	246637687	247344606	247876411	0.779353	1.69901e-20	3.42484e-06	3.42484e-06	1	246049968	247896154
nrow:100	201	INC:F:Allelic	1	246498375	247225848	247786317	0.786286	3.99337e-21	3.4844e-06	3.4844e-06	1	246049968	247896154
nrow:100	201	INC:F:Allelic	1	246403976	247156187	247712113	0.770324	1.09431e-19	3.4879e-06	3.4879e-06	1	246049968	247896154
nrow:100	201	INC:F:Allelic	1	246394482	247150286	247704772	0.76891	1.46139e-19	3.56713e-06	3.56713e-06	1	246049968	247896154
nrow:100	201	INC:F:Allelic	1	246193509	246999326	247532871	0.77705	2.73924e-20	3.91056e-06	3.91056e-06	1	246049968	247896154
nrow:100	201	INC:F:Allelic	1	246135547	246960263	247484424	0.774168	4.96773e-20	4.04209e-06	4.04209e-06	1	246049968	247896154
nrow:100	201	INC:F:Allelic	1	246637703	247345275	247878845	0.778712	1.94118e-20	4.06205e-06	4.06205e-06	1	246049968	247896154
nrow:100	201	INC:F:Codominant	1	246128149	246935285	247457352	0.767749	1.85203e-19	4.38032e-06	4.38032e-06	1	246049968	247896154
nrow:100	201	INC:F:Allelic	1	246293089	247071452	247599026	0.773068	6.22974e-20	4.43584e-06	4.43584e-06	1	246049968	247896154
nrow:100	201	INC:F:Allelic	1	246641963	247358545	247882970	0.771635	8.36282e-20	4.59855e-06	4.59855e-06	1	246049968	247896154
nrow:100	201	INC:F:Allelic	1	246093697	246905930	247457731	0.784725	5.53967e-21	4.62331e-06	4.62331e-06	1	246049968	247896154
nrow:100	201	INC:F:Allelic	1	246183851	246987733	247526230	0.781419	1.10535e-20	4.66565e-06	4.66565e-06	1	246049968	247896154
nrow:100	201	INC:F:Allelic	1	246421114	247173424	247723191	0.769844	1.20708e-19	4.70764e-06	4.70764e-06	1	246049968	247896154
nrow:100	201	INC:F:Allelic	1	246193725	246999356	247534028	0.778101	2.20341e-20	4.75494e-06	4.75494e-06	1	246049968	247896154
nrow:100	201	INC:F:Allelic	1	246322911	247113729	247672050	0.762376	5.51385e-19	4.78384e-06	4.78384e-06	1	246049968	247896154
nrow:100	201	INC:F:Allelic	1	246436519	247182887	247755455	0.766297	2.4894e-19	4.79611e-06	4.79611e-06	1	246049968	247896154
nrow:100	201	INC:F:Allelic	1	246178787	246976938	247520165	0.7823	9.1988e-21	4.8158e-06	4.8158e-06	1	246049968	247896154
nrow:100	201	INC:F:Allelic	1	246189449	246988255	247527115	0.781035	1.19753e-20	4.83271e-06	4.83271e-06	1	246049968	247896154
nrow:100	201	INC:F:Allelic	1	246147446	246975452	247491800	0.775081	4.11488e-20	4.85943e-06	4.85943e-06	1	246049968	247896154
nrow:100	201	INC:F:Allelic	1	246420532	247159958	247719238	0.770178	1.12741e-19	5.01929e-06	5.01929e-06	1	246049968	247896154
nrow:100	201	INC:F:Dominant	1	246573018	247299399	247859436	0.727257	5.39015e-16	5.16101e-06	5.16101e-06	1	246049968	247896154
nrow:100	201	INC:F:Codominant	1	246093697	246903111	247449260	0.77191	7.90421e-20	5.20286e-06	5.20286e-06	1	246049968	247896154
nrow:100	201	INC:F:Codominant	1	246624975	247313935	247862930	0.750185	6.3204e-18	5.24191e-06	5.24191e-06	1	246049968	247896154
nrow:100	201	INC:F:Allelic	1	246231173	247062424	247590032	0.773392	5.82789e-20	5.38074e-06	5.38074e-06	1	246049968	247896154
nrow:100	201	INC:F:Codominant	1	246134901	246945866	247457731	0.765511	2.92099e-19	5.39798e-06	5.39798e-06	1	246049968	247896154
nrow:100	201	INC:F:Allelic	1	246426700	247180692	247741825	0.768121	1.71654e-19	5.44622e-06	5.44622e-06	1	246049968	247896154
nrow:100	201	INC:F:Allelic	1	246193448	246999200	247532745	0.781803	1.02036e-20	5.47037e-06	5.47037e-06	1	246049968	247896154
nrow:100	201	INC:F:Allelic	1	246104829	246935285	247459638	0.780877	1.23748e-20	5.59411e-06	5.59411e-06	1	246049968	247896154
nrow:100	201	INC:F:Allelic	1	246079553	246903111	247452482	0.783972	6.48625e-21	5.73041e-06	5.73041e-06	1	246049968	247896154
nrow:100	201	INC:F:Allelic	1	246441287	247185284	247755704	0.76885	1.47922e-19	5.75232e-06	5.75232e-06	1	246049968	247896154
nrow:100	201	INC:F:Codominant	1	246193725	246999326	247520165	0.747965	9.80117e-18	5.877e-06	5.877e-06	1	246049968	247896154
nrow:100	201	INC:F:Codominant	1	246553302	247256362	247822827	0.75048	5.96187e-18	6.12005e-06	6.12005e-06	1	246049968	247896154
nrow:100	201	INC:F:Codominant	1	246121129	246921651	247452482	0.768111	1.72008e-19	6.24009e-06	6.24009e-06	1	246049968	247896154
nrow:100	201	INC:F:Allelic	1	246639455	247348479	247880344	0.771541	8.52671e-20	6.25897e-06	6.25897e-06	1	246049968	247896154
nrow:100	201	INC:F:Allelic	1	246121129	246945866	247462477	0.778901	1.86631e-20	6.31185e-06	6.31185e-06	1	246049968	247896154
nrow:100	201	INC:F:Allelic	1	246199036	247033237	247547322	0.773107	6.18063e-20	6.42244e-06	6.42244e-06	1	246049968	247896154
nrow:100	201	INC:F:Allelic	1	246229981	247051576	247586668	0.772997	6.32177e-20	6.52758e-06	6.52758e-06	1	246049968	247896154
nrow:100	201	INC:F:Allelic	1	246452870	247189319	247757226	0.770429	1.07088e-19	6.62998e-06	6.62998e-06	1	246049968	247896154
nrow:100	201	INC:F:Allelic	1	246311692	247096382	247636304	0.761175	7.02787e-19	6.63274e-06	6.63274e-06	1	246049968	247896154
nrow:100	201	INC:F:Allelic	1	246134901	246954580	247474447	0.772527	6.96344e-20	6.72727e-06	6.72727e-06	1	246049968	247896154
nrow:100	201	INC:F:Allelic	1	246063264	246881390	247452038	0.783766	6.77209e-21	6.73889e-06	6.73889e-06	1	246049968	247896154
nrow:100	201	INC:F:Codominant	1	246591822	247299399	247853076	0.754252	2.81732e-18	6.75512e-06	6.75512e-06	1	246049968	247896154
nrow:100	201	INC:F:Allelic	1	246299194	247082629	247618267	0.769026	1.42697e-19	6.77081e-06	6.77081e-06	1	246049968	247896154
nrow:100	201	INC:F:Allelic	1	246314940	247099323	247640135	0.760283	8.41274e-19	7.0068e-06	7.0068e-06	1	246049968	247896154
nrow:100	201	INC:F:Allelic	1	246201509	247037337	247550359	0.768595	1.55844e-19	7.15885e-06	7.15885e-06	1	246049968	247896154
nrow:100	201	INC:F:Allelic	1	246103191	246921651	247458977	0.784481	5.82998e-21	7.19132e-06	7.19132e-06	1	246049968	247896154
nrow:100	201	INC:F:Allelic	1	246213130	247040304	247582011	0.769024	1.42748e-19	7.20126e-06	7.20126e-06	1	246049968	247896154
nrow:100	201	INC:F:Allelic	1	246193987	247026893	247538305	0.777058	2.73449e-20	7.30391e-06	7.30391e-06	1	246049968	247896154
nrow:100	201	INC:F:Codominant	1	246533884	247236957	247777890	0.745845	1.48752e-17	7.31501e-06	7.31501e-06	1	246049968	247896154
nrow:100	201	INC:F:Codominant	1	246063264	246869776	247440603	0.766307	2.48467e-19	7.39177e-06	7.39177e-06	1	246049968	247896154
nrow:100	201	INC:F:Codominant	1	246570568	247287263	247829886	0.751338	5.02967e-18	7.64986e-06	7.64986e-06	1	246049968	247896154
nrow:100	201	INC:F:Codominant	1	246135547	246945994	247458977	0.757481	1.47714e-18	7.73442e-06	7.73442e-06	1	246049968	247896154
nrow:100	201	INC:F:Allelic	1	246059632	246874715	247451594	0.784135	6.26901e-21	7.85865e-06	7.85865e-06	1	246049968	247896154
nrow:100	201	INC:F:Codominant	1	246059632	246831604	247439666	0.76409	3.89725e-19	7.86576e-06	7.86576e-06	1	246049968	247896154
nrow:100	201	INC:F:Dominant	1	246570568	247295401	247853076	0.728045	4.6407e-16	7.868e-06	7.868e-06	1	246049968	247896154
nrow:100	201	INC:F:Allelic	1	246307139	247090817	247627861	0.764778	3.39004e-19	7.89138e-06	7.89138e-06	1	246049968	247896154
nrow:100	201	INC:F:Allelic	1	246079606	246904274	247457352	0.78485	5.3972e-21	8.16364e-06	8.16364e-06	1	246049968	247896154
nrow:100	201	INC:F:Codominant	1	246193509	246999200	247502863	0.740517	4.21609e-17	8.31857e-06	8.31857e-06	1	246049968	247896154
nrow:100	201	INC:F:Allelic	1	246138409	246964411	247489709	0.773997	5.14521e-20	8.32061e-06	8.32061e-06	1	246049968	247896154
nrow:100	201	INC:F:Allelic	1	246177929	246975453	247502863	0.774868	4.2997e-20	8.53309e-06	8.53309e-06	1	246049968	247896154
nrow:100	201	INC:F:Dominant	1	246178787	246987733	247520165	0.719678	2.24684e-15	8.58436e-06	8.58436e-06	1	246049968	247896154
nrow:100	201	INC:F:Allelic	1	246394264	247143531	247681954	0.768029	1.74927e-19	8.61241e-06	8.61241e-06	1	246049968	247896154
nrow:100	201	INC:F:Dominant	1	246553826	247294468	247848601	0.727908	4.76341e-16	8.62496e-06	8.62496e-06	1	246049968	247896154
nrow:100	201	INC:F:Codominant	1	246190235	246987733	247491691	0.752058	4.35924e-18	8.68459e-06	8.68459e-06	1	246049968	247896154
nrow:100	201	INC:F:Allelic	1	246147258	246967275	247491691	0.774465	4.67251e-20	8.72135e-06	8.72135e-06	1	246049968	247896154
nrow:100	201	INC:F:Codominant	1	246573784	247295401	247848601	0.751559	4.81405e-18	8.72581e-06	8.72581e-06	1	246049968	247896154
nrow:100	201	INC:F:Dominant	1	246538517	247256362	247828307	0.721515	1.59267e-15	8.74249e-06	8.74249e-06	1	246049968	247896154
nrow:100	201	INC:F:Codominant	1	246138409	246954580	247459638	0.757265	1.54252e-18	8.87255e-06	8.87255e-06	1	246049968	247896154
nrow:100	201	INC:F:Dominant	1	246573784	247312230	247862930	0.721763	1.5202e-15	8.94176e-06	8.94176e-06	1	246049968	247896154
nrow:100	201	INC:F:Codominant	1	246617317	247312230	247859436	0.752843	3.73e-18	8.94521e-06	8.94521e-06	1	246049968	247896154
nrow:100	201	INC:F:Codominant	1	246553826	247257119	247828307	0.753349	3.37248e-18	9.00829e-06	9.00829e-06	1	246049968	247896154
nrow:100	201	INC:F:Allelic	1	246657208	247359754	247894963	0.763395	4.48715e-19	9.09044e-06	9.09044e-06	1	246049968	247896154
nrow:100	201	INC:F:Allelic	1	246049968	246869776	247449260	0.784212	6.16766e-21	9.12811e-06	9.12811e-06	1	246049968	247896154
nrow:100	201	INC:F:Dominant	1	246533884	247249782	247822827	0.717972	3.08897e-15	9.26581e-06	9.26581e-06	1	246049968	247896154
nrow:100	201	INC:F:Allelic	1	246660555	247370998	247896121	0.762305	5.59382e-19	9.47821e-06	9.47821e-06	1	246049968	247896154
nrow:100	201	INC:F:Dominant	1	246531178	247236957	247786317	0.712686	8.22511e-15	9.58391e-06	9.58391e-06	1	246049968	247896154
nrow:100	201	INC:F:Allelic	1	246675514	247372781	247896154	0.756089	1.95224e-18	9.85471e-06	9.85471e-06	1	246049968	247896154
nrow:100	201	INC:F:Codominant	1	246103191	246904274	247451594	0.770861	9.80115e-20	9.89976e-06	9.89976e-06	1	246049968	247896154
nrow:100	201	INC:F:Dominant	6	46711566	47417725	48996428	0.724556	8.98683e-16	9.77894e-06	9.77894e-06	2	46711566	48996428

## Sheet: Table S3F
Table S3F. Signal localization: top adjusted p-values (< 10-5) and joint regions (localization radius 50000 bp)
Window	Count	Test	Chr	Left position	Position (hg38)	Right position	Density	Naive p-value	Adjusted p-value	Min. adjusted p-value	Region	Reglw_pos	Regup_pos	Calibrated pv
pos:50000	14	INC:F:Dominant	6	46821990	46867760	46916551	1.91962	5.26586e-14	7.87407e-08	7.87407e-08	1	46801891	46971734	8.89e-08
pos:50000	14	INC:F:Allelic	6	46821990	46867760	46916551	1.74135	4.76797e-12	2.7072e-06	7.87407e-08	1	46801891	46971734	3.3139e-06
pos:50000	14	INC:F:Codominant	6	46821990	46867760	46916551	1.76612	2.56777e-12	4.03805e-06	7.87407e-08	1	46801891	46971734	2.7282e-06
pos:50000	15	INC:F:Dominant	6	46850194	46895223	46944011	1.97538	1.59234e-15	6.2348e-07	6.2348e-07	1	46801891	46971734
pos:50000	17	INC:F:Dominant	6	46861891	46916551	46957248	2.0462	2.79892e-18	6.49247e-07	6.49247e-07	1	46801891	46971734
pos:50000	17	INC:F:Dominant	6	46861891	46910709	46957248	2.0462	2.79892e-18	7.55581e-07	7.55581e-07	1	46801891	46971734
pos:50000	17	INC:F:Dominant	6	46861891	46908506	46957248	2.0462	2.79892e-18	8.54551e-07	8.54551e-07	1	46801891	46971734
pos:50000	14	INC:F:Dominant	6	46823879	46872709	46921840	1.88499	1.27525e-13	1.27531e-06	1.27531e-06	1	46801891	46971734
pos:50000	14	INC:F:Dominant	6	46815661	46861891	46910709	1.77016	2.32084e-12	1.33912e-06	1.33912e-06	1	46801891	46971734
pos:50000	14	INC:F:Allelic	6	46815661	46861891	46910709	1.62951	7.54914e-11	2.65731e-06	1.33912e-06	1	46801891	46971734
pos:50000	16	INC:F:Dominant	6	46861891	46903448	46950281	1.96904	2.43462e-16	1.6047e-06	1.6047e-06	1	46801891	46971734
pos:50000	16	INC:F:Dominant	6	46861891	46906000	46950281	1.96904	2.43462e-16	1.64192e-06	1.64192e-06	1	46801891	46971734
pos:50000	14	INC:F:Dominant	6	46823879	46874069	46921840	1.88499	1.27525e-13	2.14015e-06	2.14015e-06	1	46801891	46971734
pos:50000	11	INC:F:Dominant	6	46801891	46850194	46895223	2.01705	2.67968e-12	2.54372e-06	2.54372e-06	1	46801891	46971734
pos:50000	11	INC:F:Codominant	6	46801891	46850194	46895223	1.86775	5.55226e-11	8.21346e-06	2.54372e-06	1	46801891	46971734
pos:50000	11	INC:F:Allelic	6	46801891	46850194	46895223	1.85816	6.7321e-11	9.27867e-06	2.54372e-06	1	46801891	46971734
pos:50000	14	INC:F:Dominant	6	46833482	46879764	46927673	1.84762	3.29548e-13	4.40129e-06	4.40129e-06	1	46801891	46971734
pos:50000	18	INC:F:Dominant	6	46872709	46921840	46971734	1.92243	1.86379e-17	4.55598e-06	4.55598e-06	1	46801891	46971734
pos:50000	11	INC:Dominant	1	89304530	89369650	89392631	1.77875	3.28768e-10	5.7853e-07	5.7853e-07	2	89263700	89427579
pos:50000	11	INC:Allelic	1	89304530	89369650	89392631	1.62329	6.93368e-09	4.06077e-06	5.7853e-07	2	89263700	89427579
pos:50000	11	INC:Codominant	1	89304530	89369650	89392631	1.53835	3.54049e-08	5.90156e-06	5.7853e-07	2	89263700	89427579
pos:50000	11	INC:Dominant	1	89304530	89352881	89392631	1.77875	3.28768e-10	5.83925e-07	5.83925e-07	2	89263700	89427579
pos:50000	11	INC:Allelic	1	89304530	89352881	89392631	1.62329	6.93368e-09	4.76409e-06	5.83925e-07	2	89263700	89427579
pos:50000	11	INC:Dominant	1	89304530	89370637	89392631	1.77875	3.28768e-10	1.07541e-06	1.07541e-06	2	89263700	89427579
pos:50000	11	INC:Codominant	1	89304530	89370637	89392631	1.53835	3.54049e-08	4.65607e-06	1.07541e-06	2	89263700	89427579
pos:50000	11	INC:Allelic	1	89304530	89370637	89392631	1.62329	6.93368e-09	4.99673e-06	1.07541e-06	2	89263700	89427579
pos:50000	11	INC:Dominant	1	89304530	89356533	89392631	1.77875	3.28768e-10	1.44726e-06	1.44726e-06	2	89263700	89427579
pos:50000	11	INC:Allelic	1	89304530	89356533	89392631	1.62329	6.93368e-09	4.79482e-06	1.44726e-06	2	89263700	89427579
pos:50000	11	INC:Codominant	1	89304530	89356533	89392631	1.53835	3.54049e-08	4.83325e-06	1.44726e-06	2	89263700	89427579
pos:50000	8	INC:Dominant	1	89304530	89323618	89370637	2.07752	6.95384e-10	1.72582e-06	1.72582e-06	2	89263700	89427579
pos:50000	8	INC:Allelic	1	89304530	89323618	89370637	1.93777	5.68946e-09	3.3508e-06	1.72582e-06	2	89263700	89427579
pos:50000	8	INC:Codominant	1	89304530	89323618	89370637	1.81681	3.41465e-08	9.92538e-06	1.72582e-06	2	89263700	89427579
pos:50000	7	INC:Dominant	1	89263700	89310550	89356533	1.67298	1.32021e-06	4.98467e-06	4.98467e-06	2	89263700	89427579
pos:50000	8	INC:Dominant	1	89352881	89381852	89427579	1.76084	7.75035e-08	5.17002e-06	5.17002e-06	2	89263700	89427579
pos:50000	28	INC:M:Dominant	11	83815083	83862356	83909744	1.18737	5.86024e-11	2.22061e-06	2.22061e-06	3	83787756	83922693
pos:50000	28	INC:M:Allelic	11	83815083	83862356	83909744	1.23088	9.20091e-12	7.17602e-06	2.22061e-06	3	83787756	83922693
pos:50000	28	INC:M:Codominant	11	83815083	83862356	83909744	1.1248	7.90215e-10	7.86586e-06	2.22061e-06	3	83787756	83922693
pos:50000	28	INC:M:Dominant	11	83815083	83868864	83909744	1.18737	5.86024e-11	2.25045e-06	2.25045e-06	3	83787756	83922693
pos:50000	28	INC:M:Allelic	11	83815083	83868864	83909744	1.23088	9.20091e-12	5.45905e-06	2.25045e-06	3	83787756	83922693
pos:50000	28	INC:M:Dominant	11	83815083	83861183	83909744	1.18737	5.86024e-11	2.34221e-06	2.34221e-06	3	83787756	83922693
pos:50000	28	INC:M:Allelic	11	83815083	83861183	83909744	1.23088	9.20091e-12	7.30734e-06	2.34221e-06	3	83787756	83922693
pos:50000	28	INC:M:Dominant	11	83805638	83858213	83902656	1.17635	9.31662e-11	2.57665e-06	2.57665e-06	3	83787756	83922693
pos:50000	28	INC:M:Allelic	11	83805638	83858213	83902656	1.23196	8.78407e-12	5.92674e-06	2.57665e-06	3	83787756	83922693
pos:50000	28	INC:M:Codominant	11	83805638	83858213	83902656	1.1076	1.59373e-09	6.69435e-06	2.57665e-06	3	83787756	83922693
pos:50000	28	INC:M:Dominant	11	83815083	83865969	83909744	1.18737	5.86024e-11	2.65447e-06	2.65447e-06	3	83787756	83922693
pos:50000	28	INC:M:Allelic	11	83815083	83865969	83909744	1.23088	9.20091e-12	7.3641e-06	2.65447e-06	3	83787756	83922693
pos:50000	28	INC:M:Codominant	11	83815083	83865969	83909744	1.1248	7.90215e-10	7.55655e-06	2.65447e-06	3	83787756	83922693
pos:50000	28	INC:M:Dominant	11	83815083	83870197	83909744	1.18737	5.86024e-11	2.73575e-06	2.73575e-06	3	83787756	83922693
pos:50000	28	INC:M:Allelic	11	83815083	83870197	83909744	1.23088	9.20091e-12	4.37406e-06	2.73575e-06	3	83787756	83922693
pos:50000	28	INC:M:Dominant	11	83815083	83867661	83909744	1.18737	5.86024e-11	3.40918e-06	3.40918e-06	3	83787756	83922693
pos:50000	28	INC:M:Allelic	11	83815083	83867661	83909744	1.23088	9.20091e-12	4.26347e-06	3.40918e-06	3	83787756	83922693
pos:50000	28	INC:M:Codominant	11	83815083	83867661	83909744	1.1248	7.90215e-10	5.007e-06	3.40918e-06	3	83787756	83922693
pos:50000	28	INC:M:Dominant	11	83805638	83855072	83902656	1.17635	9.31662e-11	3.91614e-06	3.91614e-06	3	83787756	83922693
pos:50000	28	INC:M:Allelic	11	83805638	83855072	83902656	1.23196	8.78407e-12	4.3334e-06	3.91614e-06	3	83787756	83922693
pos:50000	28	INC:M:Codominant	11	83805638	83855072	83902656	1.1076	1.59373e-09	7.08184e-06	3.91614e-06	3	83787756	83922693
pos:50000	28	INC:M:Dominant	11	83815083	83864684	83909744	1.18737	5.86024e-11	4.26072e-06	4.26072e-06	3	83787756	83922693
pos:50000	28	INC:M:Allelic	11	83815083	83864684	83909744	1.23088	9.20091e-12	4.88108e-06	4.26072e-06	3	83787756	83922693
pos:50000	28	INC:M:Codominant	11	83815083	83864684	83909744	1.1248	7.90215e-10	8.06216e-06	4.26072e-06	3	83787756	83922693
pos:50000	29	INC:M:Dominant	11	83827480	83875887	83922693	1.172	5.43108e-11	5.04765e-06	5.04765e-06	3	83787756	83922693
pos:50000	29	INC:M:Dominant	11	83827480	83880200	83922693	1.172	5.43108e-11	5.43264e-06	5.43264e-06	3	83787756	83922693
pos:50000	28	INC:M:Allelic	11	83815083	83868148	83909744	1.23088	9.20091e-12	5.45759e-06	5.45759e-06	3	83787756	83922693
pos:50000	28	INC:M:Dominant	11	83815083	83868148	83909744	1.18737	5.86024e-11	5.70121e-06	5.45759e-06	3	83787756	83922693
pos:50000	27	INC:M:Dominant	11	83805638	83852393	83902308	1.16369	3.22155e-10	6.11769e-06	6.11769e-06	3	83787756	83922693
pos:50000	28	INC:M:Codominant	11	83787756	83851253	83880200	1.07601	5.68859e-09	7.92914e-06	7.92914e-06	3	83787756	83922693
pos:50000	28	INC:M:Allelic	11	83787756	83847901	83880200	1.17601	9.44955e-11	8.51246e-06	8.51246e-06	3	83787756	83922693
pos:50000	28	INC:M:Dominant	11	83787756	83847901	83880200	1.10939	1.48163e-09	9.49745e-06	8.51246e-06	3	83787756	83922693
pos:50000	28	INC:M:Dominant	11	83787756	83842929	83880200	1.10939	1.48163e-09	9.08139e-06	9.08139e-06	3	83787756	83922693
pos:50000	28	INC:M:Allelic	11	83787756	83842929	83880200	1.17601	9.44955e-11	9.11134e-06	9.08139e-06	3	83787756	83922693
pos:50000	16	INC:F:Codominant	17	49839055	49884516	49933213	1.56559	2.38086e-11	8.86023e-06	8.86023e-06	4	49839055	49933213
pos:50000	16	INC:F:Allelic	17	49839055	49884516	49933213	1.58251	1.49445e-11	9.98982e-06	8.86023e-06	4	49839055	49933213
pos:50000	16	INC:F:Allelic	17	49839055	49883443	49933213	1.58251	1.49445e-11	9.29909e-06	9.29909e-06	4	49839055	49933213

## Sheet: Table S3G
Table S3G. Signal localization: top adjusted p-values (< 10-5) and joint regions (localization radius 100000 bp)
Window	Count	Test	Chr	Left position	Position (hg38)	Right position	Density	Naive p-value	Adjusted p-value	Min. adjusted p-value	Region	Reglw_pos	Regup_pos	Calibrated pv
pos:100000	27	INC:F:Dominant	6	46726179	46823879	46921840	1.37574	4.35312e-14	1.49147e-07	1.49147e-07	1	46703085	47062243	2.751e-07
pos:100000	27	INC:F:Allelic	6	46726179	46823879	46921840	1.29963	1.15276e-12	2.17364e-06	1.49147e-07	1	46703085	47062243	2.5266e-06
pos:100000	27	INC:F:Codominant	6	46726179	46823879	46921840	1.23778	1.55291e-11	6.63817e-06	1.49147e-07	1	46703085	47062243	5.3944e-06
pos:100000	27	INC:F:Dominant	6	46726179	46821990	46921840	1.37574	4.35312e-14	1.97014e-07	1.97014e-07	1	46703085	47062243
pos:100000	27	INC:F:Allelic	6	46726179	46821990	46921840	1.29963	1.15276e-12	2.32969e-06	1.97014e-07	1	46703085	47062243
pos:100000	27	INC:F:Codominant	6	46726179	46821990	46921840	1.23778	1.55291e-11	6.53013e-06	1.97014e-07	1	46703085	47062243
pos:100000	27	INC:F:Dominant	6	46716485	46815661	46910709	1.31599	5.73999e-13	6.69644e-07	6.69644e-07	1	46703085	47062243
pos:100000	27	INC:F:Allelic	6	46716485	46815661	46910709	1.26384	5.22976e-12	1.85736e-06	6.69644e-07	1	46703085	47062243
pos:100000	26	INC:F:Dominant	6	46760530	46850194	46946442	1.43201	1.12834e-14	1.31468e-06	1.31468e-06	1	46703085	47062243
pos:100000	27	INC:F:Dominant	6	46765332	46861891	46957248	1.49752	1.96726e-16	1.35508e-06	1.35508e-06	1	46703085	47062243
pos:100000	27	INC:F:Allelic	6	46765332	46861891	46957248	1.38007	3.60384e-14	9.11547e-06	1.35508e-06	1	46703085	47062243
pos:100000	32	INC:F:Dominant	6	46815661	46903448	46998537	1.39151	1.11386e-16	1.91572e-06	1.91572e-06	1	46703085	47062243
pos:100000	32	INC:F:Dominant	6	46815661	46906000	46998537	1.39151	1.11386e-16	1.93137e-06	1.93137e-06	1	46703085	47062243
pos:100000	34	INC:F:Dominant	6	46821990	46916551	47015236	1.41123	4.57033e-18	2.30332e-06	2.30332e-06	1	46703085	47062243
pos:100000	25	INC:F:Dominant	6	46789539	46867760	46967144	1.58885	4.8505e-17	2.62703e-06	2.62703e-06	1	46703085	47062243
pos:100000	35	INC:F:Dominant	6	46821990	46921840	47018219	1.39319	4.28948e-18	2.65425e-06	2.65425e-06	1	46703085	47062243
pos:100000	35	INC:F:Dominant	6	46821990	46927673	47018219	1.39319	4.28948e-18	2.86455e-06	2.86455e-06	1	46703085	47062243
pos:100000	34	INC:F:Dominant	6	46815661	46910709	47010047	1.38233	2.23709e-17	3.18237e-06	3.18237e-06	1	46703085	47062243
pos:100000	32	INC:F:Dominant	6	46815661	46908506	46998537	1.39151	1.11386e-16	3.41786e-06	3.41786e-06	1	46703085	47062243
pos:100000	27	INC:F:Dominant	6	46789539	46874069	46973251	1.54439	2.35297e-17	3.90212e-06	3.90212e-06	1	46703085	47062243
pos:100000	27	INC:F:Dominant	6	46789539	46872709	46971734	1.54439	2.35297e-17	3.95798e-06	3.95798e-06	1	46703085	47062243
pos:100000	27	INC:F:Dominant	6	46703085	46799908	46895223	1.32472	3.95009e-13	4.05314e-06	4.05314e-06	1	46703085	47062243
pos:100000	33	INC:F:Dominant	6	46799908	46895223	46994049	1.3346	7.84443e-16	4.85735e-06	4.85735e-06	1	46703085	47062243
pos:100000	29	INC:F:Dominant	6	46789539	46879764	46975651	1.46532	7.96105e-17	4.8614e-06	4.8614e-06	1	46703085	47062243
pos:100000	27	INC:F:Dominant	6	46703085	46801891	46895223	1.32472	3.95009e-13	5.57689e-06	5.57689e-06	1	46703085	47062243
pos:100000	34	INC:F:Dominant	6	46867760	46971734	47062243	1.39586	1.06532e-17	9.09303e-06	9.09303e-06	1	46703085	47062243
pos:100000	15	INC:Dominant	1	89207513	89304530	89392631	1.35693	1.76493e-08	2.6531e-06	2.6531e-06	2	89207513	89456034
pos:100000	18	INC:Dominant	1	89263700	89369650	89456034	1.30707	3.58666e-09	2.68109e-06	2.68109e-06	2	89207513	89456034
pos:100000	18	INC:Dominant	1	89263700	89370637	89456034	1.30707	3.58666e-09	3.31705e-06	3.31705e-06	2	89207513	89456034
pos:100000	17	INC:Dominant	1	89255766	89352881	89434663	1.33892	3.81772e-09	4.02461e-06	4.02461e-06	2	89207513	89456034
pos:100000	15	INC:Dominant	1	89207513	89310550	89392631	1.35693	1.76493e-08	4.0905e-06	4.0905e-06	2	89207513	89456034
pos:100000	15	INC:Dominant	1	89207513	89323618	89392631	1.35693	1.76493e-08	4.78752e-06	4.78752e-06	2	89207513	89456034
pos:100000	18	INC:Dominant	1	89263700	89392631	89456034	1.30707	3.58666e-09	4.7897e-06	4.7897e-06	2	89207513	89456034
pos:100000	18	INC:Dominant	1	89263700	89356533	89456034	1.30707	3.58666e-09	4.8115e-06	4.8115e-06	2	89207513	89456034
pos:100000	15	INC:Dominant	1	89207513	89311458	89392631	1.35693	1.76493e-08	5.18064e-06	5.18064e-06	2	89207513	89456034
pos:100000	18	INC:Dominant	1	89263700	89381852	89456034	1.30707	3.58666e-09	6.22514e-06	6.22514e-06	2	89207513	89456034
pos:100000	19	INC:Recessive	6	42347668	42441084	42527540	1.37891	1.56077e-10	8.90388e-06	8.90388e-06	3	42347668	42527540
