# Supplementary material for: A Genome-Wide Association Study Reveals New Genes in a Molecular Network Associated With Alcohol Dependence and Related Clinical Measures
Source: Preprints.org preprint supplement (doi:10.20944/preprints202208.0178.v1), 2022-08-09
Supplement: Supplementary file 6 [file Table S4.xlsx]

## Sheet: Table S4
Table S4. Genomic regions and genes associated with AD and related phenotypes
Phenotypes	Genotyped SNPs in LD block	Coordinates (hg38)	Regulatory elements active in brain, RNA genes, and coding exons in LD block	Regulated genes			PEC network modules	Selected top GO categories for modules	Common gene network7
				Gene symbol	Ensembl ID	Full name
Alcohol dependence, female cohort	rs79905498 - rs2206771 - rs220673 - rs2273265	chr6:46867760-46879764	1 Elite GeneHancer2, 5 PEC eQTLs3 (including 1 GTEx eQTL in basal ganglia), 13 isoQTLs4, ADGRF5	ADGRF5	ENSG00000069122	adhesion G protein-coupled receptor F5
				ADGRF5-AS1	ENSG00000225730	lncRNA6
				ADGRF4	ENSG00000153294	adhesion G protein-coupled receptor F4
				ADGRF1	ENSG00000153292	adhesion G protein-coupled receptor F1
				SLC25A275	ENSG00000153291	solute carrier family 25 member 27	geneM1	Synapse
				TDRD6	ENSG00000180113	tudor domain containing 6
Alcohol craving (PACS), female cohort | Brain region volumes (right vessel)8	rs9842222-rs62275413-rs6787296-rs118077175-rs114677115	chr3:146650400-146710316	1 PEC eQTL, 2 isoQTLs	N/A	ENSG00000244358	lncRNA
				PLSCR1	ENSG00000188313	phospholipid scramblase 1	geneM5	Inflammatory response
				PLSCR2	ENSG00000163746	phospholipid scramblase 2
				N/A	ENSG00000241358	phospholipid scramblase 2 (PLSCR2) pseudogene
Alcohol craving (PACS), female cohort | Neuroticism	rs593531-rs597113-rs117599361-rs645184-rs612040-rs35957017-rs76617396	chr11:74406417-74439966	1 Elite GeneHancer, 1 GTEx eQTL (rs593531) in brain cortex, basal ganglia, hippocampus, and hypothalamus, 62 PEC eQTLs, 10 isoQTLs, ENSG00000254631, ENSG00000255440	PLEKHB1	ENSG00000021300	pleckstrin homology domain containing B1	geneM2	Axon ensheathment
				PGM2L1	ENSG00000165434	phosphoglucomutase 2 like 1, glucose 1,6-bisphosphate synthase	geneM16	Neuron development, neuronal cell body, ion channel activity, axon guidance
				XRRA1	ENSG00000166435	X-ray radiation resistance associated 1
				KCNE3	ENSG00000175538	potassium voltage-gated channel subfamily E regulatory subunit 3	geneM6	Leukocyte activation, signaling receptor activity, cell surface
				UCP3	ENSG00000175564	uncoupling protein 3
				UCP2	ENSG00000175567	uncoupling protein 2
				N/A	ENSG00000254963	lncRNA
				N/A	ENSG00000256098	cytochrome c oxidase subunit VIc (COX6C) pseudogene
				RPL31P46	ENSG00000241170	ribosomal protein L31 (RPL31) pseudogene
				OR2AT1P	ENSG00000254475	olfactory receptor family 2 subfamily AT member 1 pseudogene
				CYCSP27	ENSG00000255444	CYCS pseudogene 27
				PAAF1	ENSG00000175575	proteasomal ATPase associated factor 1	geneM2	Axon ensheathment
				POLD3	ENSG00000077514	DNA polymerase delta 3, accessory subunit
				C2CD3	ENSG00000168014	C2 domain containing 3 centriole elongation regulator
				N/A	ENSG00000254631	novel transcript, antisense to PGM2L1
				N/A	ENSG00000255440	lncRNA
Trait anxiety (STAI), female cohort | Proneness to anger	rs9384805-rs2148709-rs2148710-rs7761230-rs17072912-rs1022650	chr6:111780522-111805552	3 Elite Gene-Hancers, 10 PEC Enhancers, 1 GTEx eQTL (rs2148710) in frontal cortex, basal ganglia, and hippocampus, 7 PEC eQTLs, 10 isoQTLs	FYN	ENSG00000010810	FYN proto-oncogene, Src family tyrosine kinase	geneM3	Signaling receptor activity, cell surface
				CCN6	ENSG00000112761	cellular communication network factor 6	geneM1	Synapse
				REV3L	ENSG00000009413	REV3 like, DNA directed polymerase zeta catalytic subunit	geneM28	Fanconi anemia pathway
				SLC16A10	ENSG00000112394	solute carrier family 16 member 10
				CDK19	ENSG00000155111	cyclin dependent kinase 19	geneM2	Axon ensheathment
				LINC02527	ENSG00000227012	long intergenic non-protein coding RNA 2527
				N/A	ENSG00000255389	chromosome 6 open reading frame 3, a lncRNA gene
				LAMA4-AS1	ENSG00000226440	LAMA4 Antisense RNA 1, a lncRNA gene
Alcohol dependence, male and mixed cohorts | Schizophrenia	rs72808724-rs11750192-rs116277705-rs11746889-rs72791516-rs6868545	chr5:153084049-153115323	5 isoQTLs	LINC01470	ENSG00000249484	long intergenic non-protein coding RNA 1470
				GRIA1	ENSG00000155511	glutamate ionotropic receptor AMPA type subunit 1	geneM16	Neuron development, neuronal cell body, ion channel activity, axon guidance
Alcohol craving (PACS), mixed cohort | Smoking behavior phenotypes; General risk tolerance	rs117738866-rs78063634-rs76023508-rs117571072-rs10767654-rs117145980-rs4923460-rs113829044-rs925946-rs77189853-rs10501087-rs7124442-rs41282916-rs6265-rs11030104-rs7103411-rs66866077-rs988748-rs2030324-rs11030119-rs2030323-rs7934165	chr11:27583087-27710436	1 Elite GeneHancer, 1 GTEx eQTL (rs6265) in frontal cortex, basal ganglia, anterior cingulate cortex, hippocampus, substantia nigra, and hypothalamus, 129 PEC eQTLs, 93 isoQTLs, BDNF, BDNF-AS, LINC00678, ENSG00000255496	BDNF	ENSG00000176697	brain derived neurotrophic factor	geneM21	Anterograde trans-synaptic signaling
				LINC00678	ENSG00000254934	long intergenic non-protein coding RNA 678
				N/A	ENSG00000255496	novel transcript, sense overlapping BDNF
				LIN7C	ENSG00000148943	lin-7 homolog C, crumbs cell polarity complex component	geneM34	N/A
				N/A	ENSG00000242527	ribosomal protein L37a (RPL37A) pseudogene
Alcohol craving (PACS), mixed cohort | Schizophrenia	rs2958183-rs9960767-rs2958187-rs2060886-rs76786109	chr18:55482845-55508724	2 Elite Gene-Hancers, 2 PEC Enhancers, 1 isoQTL, TCF4-AS1, TCF4-AS2	TCF4-AS1	ENSG00000267028	TCF4 antisense RNA 1
				TCF4-AS2	ENSG00000267402	TCF4 antisense RNA 2
				TCF4	ENSG00000196628	transcription factor 4	geneM3	Signaling receptor activity, cell surface
				STARD6	ENSG00000174448	StAR related lipid transfer domain containing 6	geneM4	Folate biosynthesis
				C18orf54	ENSG00000166845	chromosome 18 open reading frame 54	geneM2	Axon ensheathment
				RAB27B	ENSG00000041353	RAB27B, member RAS oncogene family	geneM16	Neuron development, neuronal cell body, ion channel activity, axon guidance
				CCDC68	ENSG00000166510	coiled-coil domain containing 68	geneM1	Synapse
Amount of alcohol consumed per day, male and mixed cohorts | Ever smoked regularly	rs73059368-rs3810291-rs141514527-rs62136856-rs62136857-rs2303108-rs113125564-rs117976926-rs117436727-rs411560-rs76006549	chr19:47061334-47122571	4 Elite GeneHancers, 17 PEC Enhancers, 1 GTEx eQTL (rs3810291) in brain cortex, basal ganglia, and hypothalamus, 3 PEC eQTLs, 20 isoQTLs, ZC3H4	N/A	ENSG00000268746	lncRNA
				AP2S1	ENSG00000042753	adaptor related protein complex 2 subunit sigma 1	geneM1	Synapse
				ARHGAP35	ENSG00000160007	Rho GTPase activating protein 35
				BBC3	ENSG00000105327	BCL2 binding component 3	geneM28	Fanconi anemia pathway
				BICRA	ENSG00000063169	BRD4 interacting chromatin remodeling complex associated protein
				CALM3	ENSG00000160014	calmodulin 3	geneM1	Synapse
				CCDC61	ENSG00000104983	coiled-coil domain containing 61
				CCDC8	ENSG00000169515	coiled-coil domain containing 8	geneM3	Signaling receptor activity, cell surface
				CCDC9	ENSG00000105321	coiled-coil domain containing 9
				DACT3	ENSG00000197380	dishevelled binding antagonist of beta catenin 3
				DMPK	ENSG00000104936	DM1 protein kinase
				DMWD	ENSG00000185800	DM1 locus, WD repeat containing
				FKRP	ENSG00000181027	fukutin related protein
				FOSB	ENSG00000125740	FosB proto-oncogene, AP-1 transcription factor subunit
				FOXA3	ENSG00000170608	forkhead box A3
				GIPR	ENSG00000010310	gastric inhibitory polypeptide receptor	geneM2	Axon ensheathment
				GNG8	ENSG00000167414	G protein subunit gamma 8
				GPR4	ENSG00000177464	G protein-coupled receptor 4	geneM4	Folate biosynthesis
				HIF3A	ENSG00000124440	hypoxia inducible factor 3 subunit alpha	geneM3	Signaling receptor activity, cell surface
				IGFL2	ENSG00000204866	IGF like family member 2	geneM4	Folate biosynthesis
				IGFL2-AS1	ENSG00000268621	IGFL2 antisense RNA 1
				IGFL3	ENSG00000188624	IGF like family member 3
				IGFL4	ENSG00000204869	IGF like family member 4
				IRF2BP1	ENSG00000170604	interferon regulatory factor 2 binding protein 1	geneM14	Nuclear speck
				EML2	ENSG00000125746	EMAP like 2	geneM2	Axon ensheathment
				ERCC1	ENSG00000012061	ERCC excision repair 1, endonuclease non-catalytic subunit
				FBXO46	ENSG00000177051	F-box protein 46
				MYPOP	ENSG00000176182	Myb related transcription factor, partner of profilin
				NANOS2	ENSG00000188425	nanos C2HC-type zinc finger 2
				NOP53	ENSG00000105373	NOP53 ribosome biogenesis factor
				NOVA2	ENSG00000104967	NOVA alternative splicing regulator 2	geneM7	Synaptic vesicle cycle
				NPAS1	ENSG00000130751	neuronal PAS domain protein 1
				OPA3	ENSG00000125741	outer mitochondrial membrane lipid metabolism regulator OPA3
				PGLYRP1	ENSG00000008438	peptidoglycan recognition protein 1
				PNMA8B	ENSG00000204851	PNMA family member 8B	geneM9	Proteasome
				PPM1N	ENSG00000213889	protein phosphatase, Mg2+/Mn2+ dependent 1N
				PPP5C	ENSG00000011485	protein phosphatase 5 catalytic subunit
				PPP5D1	ENSG00000230510	PPP5 tetratricopeptide repeat domain containing 1
				PRKD2	ENSG00000105287	protein kinase D2	geneM3	Signaling receptor activity, cell surface
				PTGIR	ENSG00000160013	prostaglandin I2 receptor	geneM5	Inflammatory response
				QPCTL	ENSG00000011478	glutaminyl-peptide cyclotransferase like	geneM8	Cilium organization, microtubule
				RSPH6A	ENSG00000104941	radial spoke head 6 homolog A
				SAE1	ENSG00000142230	SUMO1 activating enzyme subunit 1	geneM9	Proteasome
				SIX5	ENSG00000177045	SIX homeobox 5	geneM3	Signaling receptor activity, cell surface
				SLC1A5	ENSG00000105281	solute carrier family 1 member 5	geneM6	Leukocyte activation, signaling receptor activity, cell surface
				SNRPD2	ENSG00000125743	small nuclear ribonucleoprotein D2 polypeptide	geneM33	Mitochondrial membrane, oxidative phosphorylation
				RTN2	ENSG00000125744	reticulon 2	geneM24	no GO categories
				STRN4	ENSG00000090372	striatin 4
				SYMPK	ENSG00000125755	symplekin
				TMEM160	ENSG00000130748	transmembrane protein 160
				VASP	ENSG00000125753	vasodilator stimulated phosphoprotein	geneM6	Leukocyte activation, signaling receptor activity, cell surface
				ZC3H4	ENSG00000130749	zinc finger CCCH-type containing 4	geneM3	Signaling receptor activity, cell surface
				ZNF541	ENSG00000118156	zinc finger protein 541
1 Associated SNPs are in bold
2 Elite GeneHancers: top enhancers and promoters from the GeneCards Suite
3 PEC eQTLs: expression quantitative trait loci identified by the PsychENCODE Consortium
4 isoQTLs: isoform percentage quantitative trait loci identified by the PsychENCODE Consortium
5 Best functional candidate genes
6 lncRNA: long non-coding ribonucleic acid
7 Participation in the common gene network is indicated by a color-filled cell
8 Replicated associations
