# Supplementary material for: A Genome-Wide Association Study Reveals New Genes in a Molecular Network Associated With Alcohol Dependence and Related Clinical Measures
Source: Preprints.org preprint supplement (doi:10.20944/preprints202208.0178.v1), 2022-08-09
Supplement: Supplementary file 7 [file Table S5.xlsx]

## Sheet: Table S5
Table S5. Previously published genes associated with alcohol dependence or consumption
Gene symbol	Ensembl gene ID	Full name	References	Common gene network1
AADAT	ENSG00000109576	aminoadipate aminotransferase	Evangelou, 2019
ACSS3	ENSG00000111058	acyl-CoA synthetase short chain family member 3	Evangelou, 2019
ACTR10	ENSG00000131966	actin related protein 10	Evangelou, 2019
ADH1B	ENSG00000196616	alcohol dehydrogenase 1B (class I), beta polypeptide	Edenberg, 2019; Gelernter, 2019; Johnson, 2020; Lai, 2019; Lopez-Leon, 2021; Sanchez-Roige, 2020; Thompson, 2020; Zhou, 2020
ADH1C	ENSG00000248144	alcohol dehydrogenase 1C (class I), gamma polypeptide	Edenberg, 2019; Johnson, 2020; Sanchez-Roige, 2020; Zhou, 2020
ADH4	ENSG00000198099	alcohol dehydrogenase 4 (class II), pi polypeptide	Johnson, 2020; Thompson, 2020
ADH5	ENSG00000197894	alcohol dehydrogenase 5 (class III), chi polypeptide	Thompson, 2020; Sanchez-Roige, 2020
ADH7	ENSG00000196344	alcohol dehydrogenase 7 (class IV), mu or sigma polypeptide	Edenberg, 2019
ADRA2A	ENSG00000150594	adrenoceptor alpha 2A	Lopez-Leon, 2021
AJAP1	ENSG00000196581	adherens junctions associated protein 1	Evangelou, 2019
ALDH2	ENSG00000111275	aldehyde dehydrogenase 2 family member	Edenberg, 2019; Johnson, 2020; Lai, 2019; Sanchez-Roige, 2020
ANKRD36	ENSG00000135976	ankyrin repeat domain 36	Evangelou, 2019
ARHGAP15	ENSG00000075884	Rho GTPase activating protein 15	Evangelou, 2019
ARID4A	ENSG00000032219	AT-rich interaction domain 4A	Sanchez-Roige, 2020; Zhou, 2020
ARL15	ENSG00000185305	ADP ribosylation factor like GTPase 15	Edenberg, 2019
ARPC1B	ENSG00000130429	actin related protein 2/3 complex subunit 1B	Evangelou, 2019
ASB3	ENSG00000115239	ankyrin repeat and SOCS box containing 3	Evangelou, 2019; Lopez-Leon, 2021
ATP5MJ	ENSG00000156411	ATP synthase membrane subunit 6.8PL	Zhou, 2020
AUTS2	ENSG00000158321	activator of transcription and developmental regulator AUTS2	Edenberg, 2019; Lopez-Leon, 2021; Sanchez-Roige, 2020
BDNF	ENSG00000176697	brain derived neurotrophic factor	Evangelou, 2019
BEND4	ENSG00000188848	BEN domain containing 4	Evangelou, 2019
BHLHE22	ENSG00000180828	basic helix-loop-helix family member e22	Evangelou, 2019
CADM2	ENSG00000175161	cell adhesion molecule 2	Edenberg, 2019; Johnson, 2020; Sanchez-Roige, 2020; Zhou, 2020
CBX5	ENSG00000094916	chromobox 5	Evangelou, 2019
CCDC63	ENSG00000173093	coiled-coil domain containing 63	Sanchez-Roige, 2020
CDH13	ENSG00000140945	cadherin 13	Sanchez-Roige, 2020
CDIN1	ENSG00000186073	CDAN1 interacting nuclease 1	Lai, 2019
CNTNAP3	ENSG00000106714	contactin associated protein family member 3	Lopez-Leon, 2021
COL6A3	ENSG00000163359	collagen type VI alpha 3 chain	Edenberg, 2019
CRHR1	ENSG00000120088	corticotropin releasing hormone receptor 1	Edenberg, 2019; Gelernter, 2019; Johnson, 2020; Sanchez-Roige, 2020; Thompson, 2020
CSMD1	ENSG00000183117	CUB and Sushi multiple domains 1	Lopez-Leon, 2021
CTNNA2	ENSG00000066032	catenin alpha 2	Sanchez-Roige, 2020
DPP6	ENSG00000130226	dipeptidyl peptidase like 6	Evangelou, 2019; Zhou, 2020
DRD2	ENSG00000149295	dopamine receptor D2	Evangelou, 2019; Johnson, 2020; Lopez-Leon, 2021; Thompson, 2020; Zhou, 2020
EFNB3	ENSG00000108947	ephrin B3	Evangelou, 2019
EIF4E	ENSG00000151247	eukaryotic translation initiation factor 4E	Sanchez-Roige, 2020; Thompson, 2020
ELAVL4	ENSG00000162374	ELAV like RNA binding protein 4	Evangelou, 2019
FGF14	ENSG00000102466	fibroblast growth factor 14	Gelernter, 2019; Johnson, 2020
FGF21	ENSG00000105550	fibroblast growth factor 21	Evangelou, 2019; Lopez-Leon, 2021; Sanchez-Roige, 2020
FNBP4	ENSG00000109920	formin binding protein 4	Sanchez-Roige, 2020
FTO	ENSG00000140718	FTO alpha-ketoglutarate dependent dioxygenase	Evangelou, 2019; Johnson, 2020; Sanchez-Roige, 2020; Zhou, 2020
FUT2	ENSG00000176920	fucosyltransferase 2	Sanchez-Roige, 2020; Zhou, 2020
GCKR	ENSG00000084734	glucokinase regulator	Edenberg, 2019; Johnson, 2020; Lopez-Leon, 2021; Sanchez-Roige, 2020; Thompson, 2020
GGT2	ENSG00000133475	gamma-glutamyltransferase 2	Lopez-Leon, 2021
GPR139	ENSG00000180269	G protein-coupled receptor 139	Sanchez-Roige, 2020
GPRC5B	ENSG00000167191	G protein-coupled receptor class C group 5 member B	Sanchez-Roige, 2020
HECTD4	ENSG00000173064	HECT domain E3 ubiquitin protein ligase 4	Sanchez-Roige, 2020
HLA-DRB1	ENSG00000196126	major histocompatibility complex, class II, DR beta 1	Lopez-Leon, 2021
HLA-DRB5	ENSG00000198502	major histocompatibility complex, class II, DR beta 5	Lopez-Leon, 2021
IGF2BP1	ENSG00000159217	insulin like growth factor 2 mRNA binding protein 1	Evangelou, 2019
IGSF9B	ENSG00000080854	immunoglobulin superfamily member 9B	Evangelou, 2019; Lopez-Leon, 2021
IPO11	ENSG00000086200	importin 11	Lopez-Leon, 2021
IRS1	ENSG00000169047	insulin receptor substrate 1	Zhou, 2020
IZUMO1	ENSG00000182264	izumo sperm-egg fusion 1	Evangelou, 2019
JCAD	ENSG00000165757	junctional cadherin 5 associated	Edenberg, 2019
KIAA0040	ENSG00000235750	uncharacterized protein KIAA0040	Lopez-Leon, 2021
KLB	ENSG00000134962	klotho beta	Edenberg, 2019; Evangelou, 2019; Johnson, 2020; Lopez-Leon, 2021; Sanchez-Roige, 2020; Thompson, 2020; Zhou, 2020
LINGO2	ENSG00000174482	leucine rich repeat and Ig domain containing 2	Lopez-Leon, 2021
MAPT	ENSG00000186868	microtubule associated protein tau	Evangelou, 2019; Sanchez-Roige, 2020
MEF2C	ENSG00000081189	myocyte enhancer factor 2C	Evangelou, 2019
METAP1	ENSG00000164024	methionyl aminopeptidase 1	Edenberg, 2019; Sanchez-Roige, 2020
MIPOL1	ENSG00000151338	mirror-image polydactyly 1	Lopez-Leon, 2021
MLXIPL	ENSG00000009950	MLX interacting protein like	Evangelou, 2019
MREG	ENSG00000118242	melanoregulin	Sanchez-Roige, 2020
MSANTD1	ENSG00000188981	Myb/SANT DNA binding domain containing 1	Evangelou, 2019
MTIF2	ENSG00000085760	mitochondrial translational initiation factor 2	Sanchez-Roige, 2020
MYBPC3	ENSG00000134571	myosin binding protein C3	Evangelou, 2019
NFKB1	ENSG00000109320	nuclear factor kappa B subunit 1	Thompson, 2020
NPIPB6	ENSG00000198156	nuclear pore complex interacting protein family member B6	Evangelou, 2019
NRM	ENSG00000137404	nurim	Sanchez-Roige, 2020
OAS3	ENSG00000111331	2'-5'-oligoadenylate synthetase 3	Sanchez-Roige, 2020
OTX2	ENSG00000165588	orthodenticle homeobox 2	Evangelou, 2019
PDE4B	ENSG00000184588	phosphodiesterase 4B	Evangelou, 2019; Sanchez-Roige, 2020; Zhou, 2020
PDLIM5	ENSG00000163110	PDZ and LIM domain 5	Edenberg, 2019
PECR	ENSG00000115425	peroxisomal trans-2-enoyl-CoA reductase	Edenberg, 2019; Sanchez-Roige, 2020
PENK	ENSG00000181195	proenkephalin	Zhou, 2020
PHF3	ENSG00000118482	PHD finger protein 3	Lopez-Leon, 2021
PMFBP1	ENSG00000118557	polyamine modulated factor 1 binding protein 1	Evangelou, 2019
PODXL	ENSG00000128567	podocalyxin like	Sanchez-Roige, 2020
PRB1	ENSG00000251655	proline rich protein BstNI subfamily 1	Lopez-Leon, 2021
PRB2	ENSG00000121335	proline rich protein BstNI subfamily 2	Lopez-Leon, 2021
PRB3	ENSG00000197870	proline rich protein BstNI subfamily 3	Lopez-Leon, 2021
PRB4	ENSG00000230657	proline rich protein BstNI subfamily 4	Lopez-Leon, 2021
PRKG1	ENSG00000185532	protein kinase cGMP-dependent 1	Sanchez-Roige, 2020
PSMD7	ENSG00000103035	proteasome 26S subunit, non-ATPase 7	Evangelou, 2019
PTP4A1	ENSG00000112245	protein tyrosine phosphatase 4A1	Lopez-Leon, 2021
RABGAP1L	ENSG00000152061	RAB GTPase activating protein 1 like	Lai, 2019
SCLT1	ENSG00000151466	sodium channel and clathrin linker 1	Edenberg, 2019
SCN8A	ENSG00000196876	sodium voltage-gated channel alpha subunit 8	Evangelou, 2019
SERINC2	ENSG00000168528	serine incorporator 2	Lopez-Leon, 2021; Sanchez-Roige, 2020
SERPINA1	ENSG00000197249	serpin family A member 1	Evangelou, 2019
SEZ6L2	ENSG00000174938	seizure related 6 homolog like 2	Evangelou, 2019
SH2B3	ENSG00000111252	SH2B adaptor protein 3	Edenberg, 2019
SIX3	ENSG00000138083	SIX homeobox 3	Evangelou, 2019; Johnson, 2020; Zhou, 2020
SLC39A13	ENSG00000165915	solute carrier family 39 member 13	Edenberg, 2019; Sanchez-Roige, 2020; Zhou, 2020
SLC39A8	ENSG00000138821	solute carrier family 39 member 8	Edenberg, 2019; Evangelou, 2019; Johnson, 2020; ; Lopez-Leon, 2021; Sanchez-Roige, 2020; Thompson, 2020; Zhou, 2020
SLC4A8	ENSG00000050438	solute carrier family 4 member 8	Zhou, 2020
SLC6A1	ENSG00000157103	solute carrier family 6 member 1	Lopez-Leon, 2021
SLF2	ENSG00000119906	SMC5-SMC6 complex localization factor 2	Evangelou, 2019
SORL1	ENSG00000137642	sortilin related receptor 1	Evangelou, 2019; Zhou, 2020
STAT6	ENSG00000166888	signal transducer and activator of transcription 6	Evangelou, 2019
STH	ENSG00000256762	saitohin	Evangelou, 2019
STK40	ENSG00000196182	serine/threonine kinase 40	Lopez-Leon, 2021
SYT14	ENSG00000143469	synaptotagmin 14	Evangelou, 2019
TANK	ENSG00000136560	TRAF family member associated NFKB activator	Lopez-Leon, 2021
TCAP	ENSG00000173991	titin-cap	Evangelou, 2019
TENM2	ENSG00000145934	teneurin transmembrane protein 2	Evangelou, 2019
THSD7B	ENSG00000144229	thrombospondin type 1 domain containing 7B	Zhou, 2020
TMX2	ENSG00000213593	thioredoxin related transmembrane protein 2	Zhou, 2020
TNRC6A	ENSG00000090905	trinucleotide repeat containing adaptor 6A	Evangelou, 2019; Zhou, 2020
TP53TG3D	ENSG00000205456	TP53 target 3D	Lopez-Leon, 2021
TSN	ENSG00000211460	translin	Lai, 2019
TSPAN5	ENSG00000168785	tetraspanin 5	Thompson, 2020
UNC5B	ENSG00000107731	unc-5 netrin receptor B	Zhou, 2020
UTP20	ENSG00000120800	UTP20 small subunit processome component	Edenberg, 2019
VRK2	ENSG00000028116	VRK serine/threonine kinase 2	Evangelou, 2019; Zhou, 2020
XPO7	ENSG00000130227	exportin 7	Gelernter, 2019
ZNF462	ENSG00000148143	zinc finger protein 462	Evangelou, 2019
ZNF578	ENSG00000258405	zinc finger protein 578	Lopez-Leon, 2021
ZRANB2	ENSG00000132485	zinc finger RANBP2-type containing 2	Evangelou, 2019
1 Participation in the common gene network is indicated by a color-filled cell
